# Supplementary material for: Impact of the m.13513G>A Variant on the Functions of the OXPHOS System and Cell Retrograde Signaling
Source: MDPI journal article supplement (doi:10.3390/cimb45030115), 2023-02-22
Supplement: s1 [file s1]

**Table S1. The primer used for Selfie-Digital PCR**

| <b>Gene</b>   | <b>Amplicon size (bp)</b> | <b>Forward primer sequence 5'-3'</b> | <b>Reverse primer sequence 5'-3'</b> |
|---------------|---------------------------|--------------------------------------|--------------------------------------|
| <i>GAPDH</i>  | 74                        | GATGGCCCCTCCGGGAAACT                 | GCGCCAGTAGAGGCAGGGAT                 |
| <i>PPIA</i>   | 70                        | ACCGCCGAGGAAAACCGTGT                 | CGTCGACGGCAATGTCGAAGAA               |
| <i>RPL30</i>  | 92                        | GTGGGAAGTACGTCCTGGGGT                | AGCTGGGCAGTTGTTAGCGA                 |
| <i>DYDC2</i>  | 61                        | GCTTTGGAAATTGCCTGGCCC                | GGGTCACTGGGCCGAACCTT                 |
| <i>TCEA3</i>  | 96                        | AGGAAGAAGAAAGAGGAAGCGCTGA            | ACCATCCCACTCAGACAGAGTTCA             |
| <i>GRID1</i>  | 91                        | CTCTCGGCCCTGGAGATGGG                 | AGGTGCTGACCGAGAGCTGG                 |
| <i>HKDC1</i>  | 100                       | TGGGGGAGATTGTGCGGCAG                 | TCGAAGATGCCCCTGGTCCG                 |
| <i>SEL1L3</i> | 87                        | GCTGTTCTGGGGGCAGCAAG                 | GGATCCTCCGTCTCCAGGGC                 |
| <i>DHRS2</i>  | 85                        | GGGCTGGTTTCATCCCTGTGC                | TACCCGGTTAGCCAGGACGC                 |
| <i>FABP3</i>  | 74                        | CCTTGACGCCTGCTCTCTT                  | GTGCCCAGGAAAGCGTCCAC                 |
| <i>RYS3</i>   | 65                        | CGACCAGGTGGACCCCTTCC                 | AAGAAGAGGCCCCAGCCCACC                |
| <i>GRM2</i>   | 82                        | GGCCATGGGATCGCTGCTTG                 | CAGCACCTTCTTGGCTGGGC                 |
| <i>DPYSL4</i> | 74                        | TGGTCCTTCCTGGTGGCGTT                 | GTCGTCAGCCGGTGTCTATGC                |
| <i>ABCG1</i>  | 80                        | ATGACGGAGCCCAAGTCGGT                 | AGCAGGTCCGTCTCAGTGGC                 |
