# Supplementary material for: Impact of the m.13513G>A Variant on the Functions of the OXPHOS System and Cell Retrograde Signaling
Source: MDPI journal article supplement (doi:10.3390/cimb45030115), 2023-02-22
Supplement: s1 [file s1]

Supplementary Table S1. The primer used for Selfie-digital PCR.

Supplementary Table S2. List of differentially expressed genes (DEGs). Selected genes that correspond to chosen criteria ( $p_{adj} < 0.05$  and absolute logFold change  $> 2$ ) are shown in green. Negative log2FoldChange are shown in red.

Supplementary Table S3. Gene Ontology terms determined for the selected 31 DEGs differing significantly in cybrid cell lines harboring 50% and 70% of the m.13513G>A variant in the MT-ND5 gene compared with WT cells, ranked by statistical significance ( $p < 0.05$  and absolute logFold change  $> 2$ ).

Supplementary Table S4. Gene Ontology terms determined for the selected 437 DEGs that differed significantly between cybrid cell lines harboring 50% and 70% of the m.13513G>A variant in MT-ND5 gene, ranked by statistical significance ( $p < 0.05$  and absolute logFold change  $> 2$ ).

Figure S1. The dynamics in transcription level of selected genes evaluated by Selfie-digital PCR in cybrid cells bearing m.13513G>A mtDNA variant. Graph shows representative experiment.
