# Supplementary material for: Impact of the m.13513G>A Variant on the Functions of the OXPHOS System and Cell Retrograde Signaling
Source: Curr Issues Mol Biol. 2023 Feb 22;45(3):1794–809. doi: 10.3390/cimb45030115 (PMC10047405; doi:10.3390/cimb45030115)
Supplement: Supplementary file 1 [file cimb-45-00115-s001.zip]

Archive with 6 entries (6 files):
- cimb-2149402-Table S1.pdf
- cimb-2149402-title.pdf
- Kidere et al_2022_Figure S1.pdf
- Supplementary Table S2_new.xlsx
- Supplementary Table S3_new.xlsx
- Supplementary Table S4_new.xlsx
