# Supplementary material for: Impact of the m.13513G>A Variant on the Functions of the OXPHOS System and Cell Retrograde Signaling
Source: Curr Issues Mol Biol. 2023 Feb 22;45(3):1794–809. doi: 10.3390/cimb45030115 (PMC10047405; doi:10.3390/cimb45030115)
Supplement: Supplementary file 1 [file cimb-45-00115-s001.zip › Supplementary Table S2_new.xlsx]

## Sheet: Mut70andMut50_vs_WT
EnsemblId	Gene	baseMean	log2FoldChange	pvalue	padj	DEGs	description	aliases	designations	nomenclaturename	atlas	ensembl	ncbi	pubmed	pubmed10
ENSG00000276547	PCDHGB5	38.8388	-4.27508	3.23932e-11	5.2328e-07	Y	protocadherin gamma subfamily B, 5	PCDH-GAMMA-B5	protocadherin gamma-B5	protocadherin gamma subfamily B, 5	https://www.ensembl.org/Homo_sapiens/Gene/ExpressionAtlas?g=ENSG00000276547	http://www.ensembl.org/id/ENSG00000276547	https://www.ncbi.nlm.nih.gov/gene?term=(PCDHGB5[Gene Name]) AND Homo sapiens[Organism]
ENSG00000078098	FAP	23.3765	-5.31415	1.77481e-09	1.43352e-05	Y	fibroblast activation protein alpha	DPPIV, FAPA, FAPalpha, SIMP	prolyl endopeptidase FAP|170 kDa melanoma membrane-bound gelatinase|dipeptidyl peptidase FAP|gelatine degradation protease FAP|integral membrane serine protease|post-proline cleaving enzyme|seprase|surface-expressed protease	fibroblast activation protein alpha	https://www.ensembl.org/Homo_sapiens/Gene/ExpressionAtlas?g=ENSG00000078098	http://www.ensembl.org/id/ENSG00000078098	https://www.ncbi.nlm.nih.gov/gene?term=(FAP[Gene Name]) AND Homo sapiens[Organism]	https://pubmed.ncbi.nlm.nih.gov/34533130 https://pubmed.ncbi.nlm.nih.gov/34528906 https://pubmed.ncbi.nlm.nih.gov/34500535 https://pubmed.ncbi.nlm.nih.gov/34487537 https://pubmed.ncbi.nlm.nih.gov/34361120 https://pubmed.ncbi.nlm.nih.gov/34335962 https://pubmed.ncbi.nlm.nih.gov/34321159 https://pubmed.ncbi.nlm.nih.gov/34298868 https://pubmed.ncbi.nlm.nih.gov/34224960 https://pubmed.ncbi.nlm.nih.go…	https://pubmed.ncbi.nlm.nih.gov/34533130 https://pubmed.ncbi.nlm.nih.gov/34528906 https://pubmed.ncbi.nlm.nih.gov/34500535 https://pubmed.ncbi.nlm.nih.gov/34487537 https://pubmed.ncbi.nlm.nih.gov/34361120 https://pubmed.ncbi.nlm.nih.gov/34335962 https://pubmed.ncbi.nlm.nih.gov/34321159 https://pubmed.ncbi.nlm.nih.gov/34298868 https://pubmed.ncbi.nlm.nih.gov/34224960 https://pubmed.ncbi.nlm.nih.go…	https://pubmed.ncbi.nlm.nih.gov/34560729 https://pubmed.ncbi.nlm.nih.gov/34560095 https://pubmed.ncbi.nlm.nih.gov/34556528 https://pubmed.ncbi.nlm.nih.gov/34551961 https://pubmed.ncbi.nlm.nih.gov/34546508 https://pubmed.ncbi.nlm.nih.gov/34537893 https://pubmed.ncbi.nlm.nih.gov/34537192 https://pubmed.ncbi.nlm.nih.gov/34533130 https://pubmed.ncbi.nlm.nih.gov/34531265 https://pubmed.ncbi.nlm.nih.go…
ENSG00000133665	DYDC2	13.3226	-7.12119	1.51876e-08	8.178e-05	Y	DPY30 domain containing 2		DPY30 domain-containing protein 2	DPY30 domain containing 2	https://www.ensembl.org/Homo_sapiens/Gene/ExpressionAtlas?g=ENSG00000133665	http://www.ensembl.org/id/ENSG00000133665	https://www.ncbi.nlm.nih.gov/gene?term=(DYDC2[Gene Name]) AND Homo sapiens[Organism]	https://pubmed.ncbi.nlm.nih.gov/32686114 https://pubmed.ncbi.nlm.nih.gov/18197198	https://pubmed.ncbi.nlm.nih.gov/32686114 https://pubmed.ncbi.nlm.nih.gov/18197198	https://pubmed.ncbi.nlm.nih.gov/33680915 https://pubmed.ncbi.nlm.nih.gov/32686114 https://pubmed.ncbi.nlm.nih.gov/18197198
ENSG00000204219	TCEA3	81.1722	3.96755	2.93282e-08	0.000105348	Y	transcription elongation factor A3	TFIIS, TFIIS.H	transcription elongation factor A protein 3|rhabdomyosarcoma antigen MU-RMS-40.22|transcription elongation factor A (SII), 3|transcription elongation factor S-II protein 3|transcription elongation factor TFIIS.h	transcription elongation factor A3	https://www.ensembl.org/Homo_sapiens/Gene/ExpressionAtlas?g=ENSG00000204219	http://www.ensembl.org/id/ENSG00000204219	https://www.ncbi.nlm.nih.gov/gene?term=(TCEA3[Gene Name]) AND Homo sapiens[Organism]	https://pubmed.ncbi.nlm.nih.gov/31988307 https://pubmed.ncbi.nlm.nih.gov/31158246 https://pubmed.ncbi.nlm.nih.gov/26498664 https://pubmed.ncbi.nlm.nih.gov/23357533 https://pubmed.ncbi.nlm.nih.gov/19658189 https://pubmed.ncbi.nlm.nih.gov/9790746	https://pubmed.ncbi.nlm.nih.gov/31988307 https://pubmed.ncbi.nlm.nih.gov/31158246 https://pubmed.ncbi.nlm.nih.gov/26498664 https://pubmed.ncbi.nlm.nih.gov/23357533 https://pubmed.ncbi.nlm.nih.gov/19658189 https://pubmed.ncbi.nlm.nih.gov/9790746	https://pubmed.ncbi.nlm.nih.gov/34430676 https://pubmed.ncbi.nlm.nih.gov/33670246 https://pubmed.ncbi.nlm.nih.gov/32411183 https://pubmed.ncbi.nlm.nih.gov/31988307 https://pubmed.ncbi.nlm.nih.gov/31158246 https://pubmed.ncbi.nlm.nih.gov/30623413 https://pubmed.ncbi.nlm.nih.gov/28161635 https://pubmed.ncbi.nlm.nih.gov/26498664 https://pubmed.ncbi.nlm.nih.gov/24397209 https://pubmed.ncbi.nlm.nih.go…
ENSG00000164161	HHIP	200.639	-1.64845	3.36129e-08	0.000105348
ENSG00000270885	RASL10B	66.3813	-2.27438	3.9129e-08	0.000105348	Y	RAS like family 10 member B	RRP17, VTS58635	ras-like protein family member 10B|Ras-related protein 17|alternative protein RASL10B|ras-like protein VTS58635	RAS like family 10 member B	https://www.ensembl.org/Homo_sapiens/Gene/ExpressionAtlas?g=ENSG00000270885	http://www.ensembl.org/id/ENSG00000270885	https://www.ncbi.nlm.nih.gov/gene?term=(RASL10B[Gene Name]) AND Homo sapiens[Organism]	https://pubmed.ncbi.nlm.nih.gov/30016783 https://pubmed.ncbi.nlm.nih.gov/25314065 https://pubmed.ncbi.nlm.nih.gov/22681909 https://pubmed.ncbi.nlm.nih.gov/17028781	https://pubmed.ncbi.nlm.nih.gov/30016783 https://pubmed.ncbi.nlm.nih.gov/25314065 https://pubmed.ncbi.nlm.nih.gov/22681909 https://pubmed.ncbi.nlm.nih.gov/17028781	https://pubmed.ncbi.nlm.nih.gov/30016783 https://pubmed.ncbi.nlm.nih.gov/25314065 https://pubmed.ncbi.nlm.nih.gov/22681909 https://pubmed.ncbi.nlm.nih.gov/18188004 https://pubmed.ncbi.nlm.nih.gov/17028781
ENSG00000163762	TM4SF18	68.2463	-2.76621	7.60404e-08	0.000175479	Y	transmembrane 4 L six family member 18	L6D	transmembrane 4 L6 family member 18	transmembrane 4 L six family member 18	https://www.ensembl.org/Homo_sapiens/Gene/ExpressionAtlas?g=ENSG00000163762	http://www.ensembl.org/id/ENSG00000163762	https://www.ncbi.nlm.nih.gov/gene?term=(TM4SF18[Gene Name]) AND Homo sapiens[Organism]	https://pubmed.ncbi.nlm.nih.gov/31671693 https://pubmed.ncbi.nlm.nih.gov/31189101 https://pubmed.ncbi.nlm.nih.gov/30897168	https://pubmed.ncbi.nlm.nih.gov/31671693 https://pubmed.ncbi.nlm.nih.gov/31189101 https://pubmed.ncbi.nlm.nih.gov/30897168	https://pubmed.ncbi.nlm.nih.gov/31671693 https://pubmed.ncbi.nlm.nih.gov/31189101 https://pubmed.ncbi.nlm.nih.gov/30897168
ENSG00000166396	SERPINB7	25.6851	-4.23534	2.36781e-07	0.000473997	Y	serpin family B member 7	MEGSIN, PPKN, TP55	serpin B7|mesangium predominant gene, megsin|serine (or cysteine) proteinase inhibitor, clade B (ovalbumin), member 7|serpin peptidase inhibitor, clade B (ovalbumin), member 7	serpin family B member 7	https://www.ensembl.org/Homo_sapiens/Gene/ExpressionAtlas?g=ENSG00000166396	http://www.ensembl.org/id/ENSG00000166396	https://www.ncbi.nlm.nih.gov/gene?term=(SERPINB7[Gene Name]) AND Homo sapiens[Organism]	https://pubmed.ncbi.nlm.nih.gov/33914963 https://pubmed.ncbi.nlm.nih.gov/33902244 https://pubmed.ncbi.nlm.nih.gov/33575348 https://pubmed.ncbi.nlm.nih.gov/33012634 https://pubmed.ncbi.nlm.nih.gov/32892407 https://pubmed.ncbi.nlm.nih.gov/32406097 https://pubmed.ncbi.nlm.nih.gov/31706940 https://pubmed.ncbi.nlm.nih.gov/31573665 https://pubmed.ncbi.nlm.nih.gov/30592269 https://pubmed.ncbi.nlm.nih.go…	https://pubmed.ncbi.nlm.nih.gov/33914963 https://pubmed.ncbi.nlm.nih.gov/33902244 https://pubmed.ncbi.nlm.nih.gov/33575348 https://pubmed.ncbi.nlm.nih.gov/33012634 https://pubmed.ncbi.nlm.nih.gov/32892407 https://pubmed.ncbi.nlm.nih.gov/32406097 https://pubmed.ncbi.nlm.nih.gov/31706940 https://pubmed.ncbi.nlm.nih.gov/31573665 https://pubmed.ncbi.nlm.nih.gov/30592269 https://pubmed.ncbi.nlm.nih.go…	https://pubmed.ncbi.nlm.nih.gov/34454985 https://pubmed.ncbi.nlm.nih.gov/34379845 https://pubmed.ncbi.nlm.nih.gov/34334259 https://pubmed.ncbi.nlm.nih.gov/33914963 https://pubmed.ncbi.nlm.nih.gov/33902244 https://pubmed.ncbi.nlm.nih.gov/33588889 https://pubmed.ncbi.nlm.nih.gov/33575348 https://pubmed.ncbi.nlm.nih.gov/33362511 https://pubmed.ncbi.nlm.nih.gov/33012634 https://pubmed.ncbi.nlm.nih.go…
ENSG00000120278	PLEKHG1	160.547	2.05173	2.92891e-07	0.000473997	Y	pleckstrin homology and RhoGEF domain containing G1	ARHGEF41	pleckstrin homology domain-containing family G member 1|pleckstrin homology domain containing, family G (with RhoGef domain) member 1	pleckstrin homology and RhoGEF domain containing G1	https://www.ensembl.org/Homo_sapiens/Gene/ExpressionAtlas?g=ENSG00000120278	http://www.ensembl.org/id/ENSG00000120278	https://www.ncbi.nlm.nih.gov/gene?term=(PLEKHG1[Gene Name]) AND Homo sapiens[Organism]	https://pubmed.ncbi.nlm.nih.gov/30659137 https://pubmed.ncbi.nlm.nih.gov/29967039 https://pubmed.ncbi.nlm.nih.gov/25795300 https://pubmed.ncbi.nlm.nih.gov/24366360 https://pubmed.ncbi.nlm.nih.gov/23972371 https://pubmed.ncbi.nlm.nih.gov/19165232	https://pubmed.ncbi.nlm.nih.gov/30659137 https://pubmed.ncbi.nlm.nih.gov/29967039 https://pubmed.ncbi.nlm.nih.gov/25795300 https://pubmed.ncbi.nlm.nih.gov/24366360 https://pubmed.ncbi.nlm.nih.gov/23972371 https://pubmed.ncbi.nlm.nih.gov/19165232	https://pubmed.ncbi.nlm.nih.gov/34552612 https://pubmed.ncbi.nlm.nih.gov/33415023 https://pubmed.ncbi.nlm.nih.gov/33145279 https://pubmed.ncbi.nlm.nih.gov/31551276 https://pubmed.ncbi.nlm.nih.gov/31469028 https://pubmed.ncbi.nlm.nih.gov/31249732 https://pubmed.ncbi.nlm.nih.gov/30659137 https://pubmed.ncbi.nlm.nih.gov/29967039 https://pubmed.ncbi.nlm.nih.gov/29485996 https://pubmed.ncbi.nlm.nih.go…
ENSG00000188042	ARL4C	2486.98	1.77012	2.93424e-07	0.000473997
ENSG00000182771	GRID1	47.8025	-2.46241	3.7734e-07	0.000554142	Y	glutamate ionotropic receptor delta type subunit 1	GluD1, GluD1-b	glutamate receptor ionotropic, delta-1|gluR delta-1 subunit|glutamate receptor delta-1 subunit	glutamate ionotropic receptor delta type subunit 1	https://www.ensembl.org/Homo_sapiens/Gene/ExpressionAtlas?g=ENSG00000182771	http://www.ensembl.org/id/ENSG00000182771	https://www.ncbi.nlm.nih.gov/gene?term=(GRID1[Gene Name]) AND Homo sapiens[Organism]	https://pubmed.ncbi.nlm.nih.gov/34365621 https://pubmed.ncbi.nlm.nih.gov/32417679 https://pubmed.ncbi.nlm.nih.gov/32193444 https://pubmed.ncbi.nlm.nih.gov/32109663 https://pubmed.ncbi.nlm.nih.gov/31925409 https://pubmed.ncbi.nlm.nih.gov/31738830 https://pubmed.ncbi.nlm.nih.gov/29914355 https://pubmed.ncbi.nlm.nih.gov/29248581 https://pubmed.ncbi.nlm.nih.gov/28696429 https://pubmed.ncbi.nlm.nih.go…	https://pubmed.ncbi.nlm.nih.gov/34365621 https://pubmed.ncbi.nlm.nih.gov/32417679 https://pubmed.ncbi.nlm.nih.gov/32193444 https://pubmed.ncbi.nlm.nih.gov/32109663 https://pubmed.ncbi.nlm.nih.gov/31925409 https://pubmed.ncbi.nlm.nih.gov/31738830 https://pubmed.ncbi.nlm.nih.gov/29914355 https://pubmed.ncbi.nlm.nih.gov/29248581 https://pubmed.ncbi.nlm.nih.gov/28696429 https://pubmed.ncbi.nlm.nih.go…	https://pubmed.ncbi.nlm.nih.gov/34365621 https://pubmed.ncbi.nlm.nih.gov/34173171 https://pubmed.ncbi.nlm.nih.gov/33992669 https://pubmed.ncbi.nlm.nih.gov/33717649 https://pubmed.ncbi.nlm.nih.gov/32684843 https://pubmed.ncbi.nlm.nih.gov/32417679 https://pubmed.ncbi.nlm.nih.gov/32193444 https://pubmed.ncbi.nlm.nih.gov/32109663 https://pubmed.ncbi.nlm.nih.gov/32090358 https://pubmed.ncbi.nlm.nih.go…
ENSG00000156510	HKDC1	43.9154	-2.28501	1.51956e-06	0.00203915	Y	hexokinase domain containing 1		hexokinase HKDC1|hexokinase domain-containing protein 1|putative hexokinase HKDC1	hexokinase domain containing 1	https://www.ensembl.org/Homo_sapiens/Gene/ExpressionAtlas?g=ENSG00000156510	http://www.ensembl.org/id/ENSG00000156510	https://www.ncbi.nlm.nih.gov/gene?term=(HKDC1[Gene Name]) AND Homo sapiens[Organism]	https://pubmed.ncbi.nlm.nih.gov/34232412 https://pubmed.ncbi.nlm.nih.gov/33309778 https://pubmed.ncbi.nlm.nih.gov/33165656 https://pubmed.ncbi.nlm.nih.gov/32503434 https://pubmed.ncbi.nlm.nih.gov/32203147 https://pubmed.ncbi.nlm.nih.gov/31996147 https://pubmed.ncbi.nlm.nih.gov/30945019 https://pubmed.ncbi.nlm.nih.gov/30543855 https://pubmed.ncbi.nlm.nih.gov/30517626 https://pubmed.ncbi.nlm.nih.go…	https://pubmed.ncbi.nlm.nih.gov/34232412 https://pubmed.ncbi.nlm.nih.gov/33309778 https://pubmed.ncbi.nlm.nih.gov/33165656 https://pubmed.ncbi.nlm.nih.gov/32503434 https://pubmed.ncbi.nlm.nih.gov/32203147 https://pubmed.ncbi.nlm.nih.gov/31996147 https://pubmed.ncbi.nlm.nih.gov/30945019 https://pubmed.ncbi.nlm.nih.gov/30543855 https://pubmed.ncbi.nlm.nih.gov/30517626 https://pubmed.ncbi.nlm.nih.go…	https://pubmed.ncbi.nlm.nih.gov/34232412 https://pubmed.ncbi.nlm.nih.gov/34044809 https://pubmed.ncbi.nlm.nih.gov/33991070 https://pubmed.ncbi.nlm.nih.gov/33953693 https://pubmed.ncbi.nlm.nih.gov/33505433 https://pubmed.ncbi.nlm.nih.gov/33423158 https://pubmed.ncbi.nlm.nih.gov/33309778 https://pubmed.ncbi.nlm.nih.gov/33165656 https://pubmed.ncbi.nlm.nih.gov/32943998 https://pubmed.ncbi.nlm.nih.go…
ENSG00000134698	AGO4	142.884	1.84286	1.64102e-06	0.00203915
ENSG00000117602	RCAN3	351.371	1.43036	2.66763e-06	0.00307806
ENSG00000187231	SESTD1	378.378	1.34808	4.11625e-06	0.00443292
ENSG00000092068	SLC7A8	1199.3	1.89739	5.50452e-06	0.0055575
ENSG00000137965	IFI44	293.969	-1.60913	5.89372e-06	0.00560042
ENSG00000091490	SEL1L3	1490.5	2.22882	8.62601e-06	0.00774136	Y	SEL1L family member 3	Sel-1L3	protein sel-1 homolog 3|sel-1 suppressor of lin-12-like 3|suppressor of lin-12-like protein 3	SEL1L family member 3	https://www.ensembl.org/Homo_sapiens/Gene/ExpressionAtlas?g=ENSG00000091490	http://www.ensembl.org/id/ENSG00000091490	https://www.ncbi.nlm.nih.gov/gene?term=(SEL1L3[Gene Name]) AND Homo sapiens[Organism]	https://pubmed.ncbi.nlm.nih.gov/34284982 https://pubmed.ncbi.nlm.nih.gov/33753855 https://pubmed.ncbi.nlm.nih.gov/32417679 https://pubmed.ncbi.nlm.nih.gov/31019967 https://pubmed.ncbi.nlm.nih.gov/28234671 https://pubmed.ncbi.nlm.nih.gov/27073865	https://pubmed.ncbi.nlm.nih.gov/34284982 https://pubmed.ncbi.nlm.nih.gov/33753855 https://pubmed.ncbi.nlm.nih.gov/32417679 https://pubmed.ncbi.nlm.nih.gov/31019967 https://pubmed.ncbi.nlm.nih.gov/28234671 https://pubmed.ncbi.nlm.nih.gov/27073865	https://pubmed.ncbi.nlm.nih.gov/34540825 https://pubmed.ncbi.nlm.nih.gov/34284982 https://pubmed.ncbi.nlm.nih.gov/33753855 https://pubmed.ncbi.nlm.nih.gov/32417679 https://pubmed.ncbi.nlm.nih.gov/32274496 https://pubmed.ncbi.nlm.nih.gov/31262251 https://pubmed.ncbi.nlm.nih.gov/31019967 https://pubmed.ncbi.nlm.nih.gov/28234671 https://pubmed.ncbi.nlm.nih.gov/27073865 https://pubmed.ncbi.nlm.nih.go…
ENSG00000158747	NBL1	917.126	1.35898	9.13093e-06	0.00776321
ENSG00000100867	DHRS2	116.302	-2.52477	9.78908e-06	0.00790664	Y	dehydrogenase/reductase 2	HEP27, SDR25C1	dehydrogenase/reductase SDR family member 2, mitochondrial|dehydrogenase/reductase (SDR family) member 2|dehydrogenase/reductase member 2|dicarbonyl reductase HEP27|protein D|short chain dehydrogenase/reductase family 25C member 1|short-chain alcohol dehydrogenase family member	dehydrogenase/reductase 2	https://www.ensembl.org/Homo_sapiens/Gene/ExpressionAtlas?g=ENSG00000100867	http://www.ensembl.org/id/ENSG00000100867	https://www.ncbi.nlm.nih.gov/gene?term=(DHRS2[Gene Name]) AND Homo sapiens[Organism]	https://pubmed.ncbi.nlm.nih.gov/33652058 https://pubmed.ncbi.nlm.nih.gov/33473097 https://pubmed.ncbi.nlm.nih.gov/32586085 https://pubmed.ncbi.nlm.nih.gov/32537878 https://pubmed.ncbi.nlm.nih.gov/32342269 https://pubmed.ncbi.nlm.nih.gov/32058041 https://pubmed.ncbi.nlm.nih.gov/31436301 https://pubmed.ncbi.nlm.nih.gov/31423895 https://pubmed.ncbi.nlm.nih.gov/31291971 https://pubmed.ncbi.nlm.nih.go…	https://pubmed.ncbi.nlm.nih.gov/33652058 https://pubmed.ncbi.nlm.nih.gov/33473097 https://pubmed.ncbi.nlm.nih.gov/32586085 https://pubmed.ncbi.nlm.nih.gov/32537878 https://pubmed.ncbi.nlm.nih.gov/32342269 https://pubmed.ncbi.nlm.nih.gov/32058041 https://pubmed.ncbi.nlm.nih.gov/31436301 https://pubmed.ncbi.nlm.nih.gov/31423895 https://pubmed.ncbi.nlm.nih.gov/31291971 https://pubmed.ncbi.nlm.nih.go…	https://pubmed.ncbi.nlm.nih.gov/33667649 https://pubmed.ncbi.nlm.nih.gov/33652058 https://pubmed.ncbi.nlm.nih.gov/33473097 https://pubmed.ncbi.nlm.nih.gov/32586085 https://pubmed.ncbi.nlm.nih.gov/32537878 https://pubmed.ncbi.nlm.nih.gov/32342269 https://pubmed.ncbi.nlm.nih.gov/32058041 https://pubmed.ncbi.nlm.nih.gov/31528309 https://pubmed.ncbi.nlm.nih.gov/31436301 https://pubmed.ncbi.nlm.nih.go…
ENSG00000165097	KDM1B	499.498	1.13958	1.10789e-05	0.00796904
ENSG00000188158	NHS	97.3548	2.50412	1.15332e-05	0.00796904	Y	NHS actin remodeling regulator	CTRCT40, CXN, SCML1	Nance-Horan syndrome protein|Nance-Horan syndrome (congenital cataracts and dental anomalies)|congenital cataracts and dental anomalies protein	NHS actin remodeling regulator	https://www.ensembl.org/Homo_sapiens/Gene/ExpressionAtlas?g=ENSG00000188158	http://www.ensembl.org/id/ENSG00000188158	https://www.ncbi.nlm.nih.gov/gene?term=(NHS[Gene Name]) AND Homo sapiens[Organism]	https://pubmed.ncbi.nlm.nih.gov/34557847 https://pubmed.ncbi.nlm.nih.gov/34551912 https://pubmed.ncbi.nlm.nih.gov/34551910 https://pubmed.ncbi.nlm.nih.gov/34551745 https://pubmed.ncbi.nlm.nih.gov/34548301 https://pubmed.ncbi.nlm.nih.gov/34548296 https://pubmed.ncbi.nlm.nih.gov/34548067 https://pubmed.ncbi.nlm.nih.gov/34548065 https://pubmed.ncbi.nlm.nih.gov/34547087 https://pubmed.ncbi.nlm.nih.go…	https://pubmed.ncbi.nlm.nih.gov/34557847 https://pubmed.ncbi.nlm.nih.gov/34551912 https://pubmed.ncbi.nlm.nih.gov/34551910 https://pubmed.ncbi.nlm.nih.gov/34551745 https://pubmed.ncbi.nlm.nih.gov/34548301 https://pubmed.ncbi.nlm.nih.gov/34548296 https://pubmed.ncbi.nlm.nih.gov/34548067 https://pubmed.ncbi.nlm.nih.gov/34548065 https://pubmed.ncbi.nlm.nih.gov/34547087 https://pubmed.ncbi.nlm.nih.go…	https://pubmed.ncbi.nlm.nih.gov/34562842 https://pubmed.ncbi.nlm.nih.gov/34562809 https://pubmed.ncbi.nlm.nih.gov/34562808 https://pubmed.ncbi.nlm.nih.gov/34562779 https://pubmed.ncbi.nlm.nih.gov/34562750 https://pubmed.ncbi.nlm.nih.gov/34562741 https://pubmed.ncbi.nlm.nih.gov/34562667 https://pubmed.ncbi.nlm.nih.gov/34562589 https://pubmed.ncbi.nlm.nih.gov/34562545 https://pubmed.ncbi.nlm.nih.go…
ENSG00000172548	NIPAL4	91.2111	-2.16576	1.16925e-05	0.00796904	Y	NIPA like domain containing 4	ARCI6, ICHTHYIN, ICHYN, SLC57A6	magnesium transporter NIPA4|NIPA-like protein 4|non-imprinted in Prader-Willi/Angelman syndrome region protein 4	NIPA like domain containing 4	https://www.ensembl.org/Homo_sapiens/Gene/ExpressionAtlas?g=ENSG00000172548	http://www.ensembl.org/id/ENSG00000172548	https://www.ncbi.nlm.nih.gov/gene?term=(NIPAL4[Gene Name]) AND Homo sapiens[Organism]	https://pubmed.ncbi.nlm.nih.gov/33435499 https://pubmed.ncbi.nlm.nih.gov/31883158 https://pubmed.ncbi.nlm.nih.gov/31876100 https://pubmed.ncbi.nlm.nih.gov/31836270 https://pubmed.ncbi.nlm.nih.gov/31532840 https://pubmed.ncbi.nlm.nih.gov/31347739 https://pubmed.ncbi.nlm.nih.gov/31168818 https://pubmed.ncbi.nlm.nih.gov/30600594 https://pubmed.ncbi.nlm.nih.gov/30011118 https://pubmed.ncbi.nlm.nih.go…	https://pubmed.ncbi.nlm.nih.gov/33435499 https://pubmed.ncbi.nlm.nih.gov/31883158 https://pubmed.ncbi.nlm.nih.gov/31876100 https://pubmed.ncbi.nlm.nih.gov/31836270 https://pubmed.ncbi.nlm.nih.gov/31532840 https://pubmed.ncbi.nlm.nih.gov/31347739 https://pubmed.ncbi.nlm.nih.gov/31168818 https://pubmed.ncbi.nlm.nih.gov/30600594 https://pubmed.ncbi.nlm.nih.gov/30011118 https://pubmed.ncbi.nlm.nih.go…	https://pubmed.ncbi.nlm.nih.gov/33786896 https://pubmed.ncbi.nlm.nih.gov/33435499 https://pubmed.ncbi.nlm.nih.gov/32851342 https://pubmed.ncbi.nlm.nih.gov/31883158 https://pubmed.ncbi.nlm.nih.gov/31876100 https://pubmed.ncbi.nlm.nih.gov/31836270 https://pubmed.ncbi.nlm.nih.gov/31532840 https://pubmed.ncbi.nlm.nih.gov/31347739 https://pubmed.ncbi.nlm.nih.gov/31168818 https://pubmed.ncbi.nlm.nih.go…
ENSG00000004487	KDM1A	2005.52	1.05671	1.22019e-05	0.00796904
ENSG00000140090	SLC24A4	21.5363	-3.48643	1.23329e-05	0.00796904	Y	solute carrier family 24 member 4	AI2A5, NCKX4, SHEP6, SLC24A2	sodium/potassium/calcium exchanger 4|Na(+)/K(+)/Ca(2+)-exchange protein 4|solute carrier family 24 (sodium/potassium/calcium exchanger), member 4	solute carrier family 24 member 4	https://www.ensembl.org/Homo_sapiens/Gene/ExpressionAtlas?g=ENSG00000140090	http://www.ensembl.org/id/ENSG00000140090	https://www.ncbi.nlm.nih.gov/gene?term=(SLC24A4[Gene Name]) AND Homo sapiens[Organism]	https://pubmed.ncbi.nlm.nih.gov/34092785 https://pubmed.ncbi.nlm.nih.gov/33419465 https://pubmed.ncbi.nlm.nih.gov/33199372 https://pubmed.ncbi.nlm.nih.gov/32915910 https://pubmed.ncbi.nlm.nih.gov/32541515 https://pubmed.ncbi.nlm.nih.gov/32380970 https://pubmed.ncbi.nlm.nih.gov/32034543 https://pubmed.ncbi.nlm.nih.gov/31417139 https://pubmed.ncbi.nlm.nih.gov/30877375 https://pubmed.ncbi.nlm.nih.go…	https://pubmed.ncbi.nlm.nih.gov/34092785 https://pubmed.ncbi.nlm.nih.gov/33419465 https://pubmed.ncbi.nlm.nih.gov/33199372 https://pubmed.ncbi.nlm.nih.gov/32915910 https://pubmed.ncbi.nlm.nih.gov/32541515 https://pubmed.ncbi.nlm.nih.gov/32380970 https://pubmed.ncbi.nlm.nih.gov/32034543 https://pubmed.ncbi.nlm.nih.gov/31417139 https://pubmed.ncbi.nlm.nih.gov/30877375 https://pubmed.ncbi.nlm.nih.go…	https://pubmed.ncbi.nlm.nih.gov/34544080 https://pubmed.ncbi.nlm.nih.gov/34448475 https://pubmed.ncbi.nlm.nih.gov/34364289 https://pubmed.ncbi.nlm.nih.gov/34092785 https://pubmed.ncbi.nlm.nih.gov/33806889 https://pubmed.ncbi.nlm.nih.gov/33772937 https://pubmed.ncbi.nlm.nih.gov/33584805 https://pubmed.ncbi.nlm.nih.gov/33552145 https://pubmed.ncbi.nlm.nih.gov/33419465 https://pubmed.ncbi.nlm.nih.go…
ENSG00000253910	PCDHGB2	17.6952	-3.98317	2.06845e-05	0.01211	Y	protocadherin gamma subfamily B, 2	PCDH-GAMMA-B2	protocadherin gamma-B2	protocadherin gamma subfamily B, 2	https://www.ensembl.org/Homo_sapiens/Gene/ExpressionAtlas?g=ENSG00000253910	http://www.ensembl.org/id/ENSG00000253910	https://www.ncbi.nlm.nih.gov/gene?term=(PCDHGB2[Gene Name]) AND Homo sapiens[Organism]
ENSG00000171224	FAM241B	136.467	-1.56501	2.07787e-05	0.01211
ENSG00000138356	AOX1	35.1152	-2.64687	2.17093e-05	0.01211	Y	aldehyde oxidase 1	AO, AOH1	aldehyde oxidase|azaheterocycle hydroxylase	aldehyde oxidase 1	https://www.ensembl.org/Homo_sapiens/Gene/ExpressionAtlas?g=ENSG00000138356	http://www.ensembl.org/id/ENSG00000138356	https://www.ncbi.nlm.nih.gov/gene?term=(AOX1[Gene Name]) AND Homo sapiens[Organism]	https://pubmed.ncbi.nlm.nih.gov/34337056 https://pubmed.ncbi.nlm.nih.gov/33450964 https://pubmed.ncbi.nlm.nih.gov/33434089 https://pubmed.ncbi.nlm.nih.gov/33407762 https://pubmed.ncbi.nlm.nih.gov/33135729 https://pubmed.ncbi.nlm.nih.gov/33020066 https://pubmed.ncbi.nlm.nih.gov/32991011 https://pubmed.ncbi.nlm.nih.gov/32911062 https://pubmed.ncbi.nlm.nih.gov/32813064 https://pubmed.ncbi.nlm.nih.go…	https://pubmed.ncbi.nlm.nih.gov/34337056 https://pubmed.ncbi.nlm.nih.gov/33450964 https://pubmed.ncbi.nlm.nih.gov/33434089 https://pubmed.ncbi.nlm.nih.gov/33407762 https://pubmed.ncbi.nlm.nih.gov/33135729 https://pubmed.ncbi.nlm.nih.gov/33020066 https://pubmed.ncbi.nlm.nih.gov/32991011 https://pubmed.ncbi.nlm.nih.gov/32911062 https://pubmed.ncbi.nlm.nih.gov/32813064 https://pubmed.ncbi.nlm.nih.go…	https://pubmed.ncbi.nlm.nih.gov/34545296 https://pubmed.ncbi.nlm.nih.gov/34484299 https://pubmed.ncbi.nlm.nih.gov/34464454 https://pubmed.ncbi.nlm.nih.gov/34462231 https://pubmed.ncbi.nlm.nih.gov/34445186 https://pubmed.ncbi.nlm.nih.gov/34430406 https://pubmed.ncbi.nlm.nih.gov/34337056 https://pubmed.ncbi.nlm.nih.gov/34290740 https://pubmed.ncbi.nlm.nih.gov/34113360 https://pubmed.ncbi.nlm.nih.go…
ENSG00000090686	USP48	613.539	1.19082	2.17402e-05	0.01211
ENSG00000136859	ANGPTL2	14.3529	-4.47069	2.41304e-05	0.0129934	Y	angiopoietin like 2	ARP2, HARP	angiopoietin-related protein 2|angiopoietin-like protein 2	angiopoietin like 2	https://www.ensembl.org/Homo_sapiens/Gene/ExpressionAtlas?g=ENSG00000136859	http://www.ensembl.org/id/ENSG00000136859	https://www.ncbi.nlm.nih.gov/gene?term=(ANGPTL2[Gene Name]) AND Homo sapiens[Organism]	https://pubmed.ncbi.nlm.nih.gov/34000514 https://pubmed.ncbi.nlm.nih.gov/33652646 https://pubmed.ncbi.nlm.nih.gov/33578584 https://pubmed.ncbi.nlm.nih.gov/33508120 https://pubmed.ncbi.nlm.nih.gov/33336720 https://pubmed.ncbi.nlm.nih.gov/33197890 https://pubmed.ncbi.nlm.nih.gov/33197687 https://pubmed.ncbi.nlm.nih.gov/32993399 https://pubmed.ncbi.nlm.nih.gov/32813109 https://pubmed.ncbi.nlm.nih.go…	https://pubmed.ncbi.nlm.nih.gov/34000514 https://pubmed.ncbi.nlm.nih.gov/33652646 https://pubmed.ncbi.nlm.nih.gov/33578584 https://pubmed.ncbi.nlm.nih.gov/33508120 https://pubmed.ncbi.nlm.nih.gov/33336720 https://pubmed.ncbi.nlm.nih.gov/33197890 https://pubmed.ncbi.nlm.nih.gov/33197687 https://pubmed.ncbi.nlm.nih.gov/32993399 https://pubmed.ncbi.nlm.nih.gov/32813109 https://pubmed.ncbi.nlm.nih.go…	https://pubmed.ncbi.nlm.nih.gov/34544978 https://pubmed.ncbi.nlm.nih.gov/34431038 https://pubmed.ncbi.nlm.nih.gov/34422408 https://pubmed.ncbi.nlm.nih.gov/34000514 https://pubmed.ncbi.nlm.nih.gov/33987955 https://pubmed.ncbi.nlm.nih.gov/33987838 https://pubmed.ncbi.nlm.nih.gov/33747748 https://pubmed.ncbi.nlm.nih.gov/33652646 https://pubmed.ncbi.nlm.nih.gov/33615956 https://pubmed.ncbi.nlm.nih.go…
ENSG00000177675	CD163L1	12.0708	-3.8809	2.51939e-05	0.0131285	Y	CD163 molecule like 1	CD163B, M160, SCARI2, WC1	scavenger receptor cysteine-rich type 1 protein M160|CD163 antigen B|CD163 antigen-like 1	CD163 molecule like 1	https://www.ensembl.org/Homo_sapiens/Gene/ExpressionAtlas?g=ENSG00000177675	http://www.ensembl.org/id/ENSG00000177675	https://www.ncbi.nlm.nih.gov/gene?term=(CD163L1[Gene Name]) AND Homo sapiens[Organism]	https://pubmed.ncbi.nlm.nih.gov/32696992 https://pubmed.ncbi.nlm.nih.gov/30670762 https://pubmed.ncbi.nlm.nih.gov/29516011 https://pubmed.ncbi.nlm.nih.gov/28639912 https://pubmed.ncbi.nlm.nih.gov/27401919 https://pubmed.ncbi.nlm.nih.gov/26838040 https://pubmed.ncbi.nlm.nih.gov/26429776 https://pubmed.ncbi.nlm.nih.gov/25877931 https://pubmed.ncbi.nlm.nih.gov/21159337 https://pubmed.ncbi.nlm.nih.go…	https://pubmed.ncbi.nlm.nih.gov/32696992 https://pubmed.ncbi.nlm.nih.gov/30670762 https://pubmed.ncbi.nlm.nih.gov/29516011 https://pubmed.ncbi.nlm.nih.gov/28639912 https://pubmed.ncbi.nlm.nih.gov/27401919 https://pubmed.ncbi.nlm.nih.gov/26838040 https://pubmed.ncbi.nlm.nih.gov/26429776 https://pubmed.ncbi.nlm.nih.gov/25877931 https://pubmed.ncbi.nlm.nih.gov/21159337 https://pubmed.ncbi.nlm.nih.go…	https://pubmed.ncbi.nlm.nih.gov/34256195 https://pubmed.ncbi.nlm.nih.gov/33357046 https://pubmed.ncbi.nlm.nih.gov/32696992 https://pubmed.ncbi.nlm.nih.gov/30823506 https://pubmed.ncbi.nlm.nih.gov/30670762 https://pubmed.ncbi.nlm.nih.gov/29516011 https://pubmed.ncbi.nlm.nih.gov/29177109 https://pubmed.ncbi.nlm.nih.gov/28639912 https://pubmed.ncbi.nlm.nih.gov/27401919 https://pubmed.ncbi.nlm.nih.go…
ENSG00000008513	ST3GAL1	757.28	1.4877	3.10674e-05	0.0153594
ENSG00000169504	CLIC4	1920.62	1.3782	3.13768e-05	0.0153594
ENSG00000121769	FABP3	7.85708	-5.62404	3.3752e-05	0.0154728	Y	fatty acid binding protein 3	FABP11, H-FABP, M-FABP, MDGI, O-FABP	fatty acid-binding protein, heart|epididymis secretory sperm binding protein|fatty acid binding protein 11|fatty acid binding protein 3, muscle and heart|heart-type fatty acid-binding protein|mammary-derived growth inhibitor|muscle fatty acid-binding protein	fatty acid binding protein 3	https://www.ensembl.org/Homo_sapiens/Gene/ExpressionAtlas?g=ENSG00000121769	http://www.ensembl.org/id/ENSG00000121769	https://www.ncbi.nlm.nih.gov/gene?term=(FABP3[Gene Name]) AND Homo sapiens[Organism]	https://pubmed.ncbi.nlm.nih.gov/34383982 https://pubmed.ncbi.nlm.nih.gov/33862084 https://pubmed.ncbi.nlm.nih.gov/33804804 https://pubmed.ncbi.nlm.nih.gov/33793060 https://pubmed.ncbi.nlm.nih.gov/33604770 https://pubmed.ncbi.nlm.nih.gov/33578613 https://pubmed.ncbi.nlm.nih.gov/33524391 https://pubmed.ncbi.nlm.nih.gov/33418576 https://pubmed.ncbi.nlm.nih.gov/33326461 https://pubmed.ncbi.nlm.nih.go…	https://pubmed.ncbi.nlm.nih.gov/34383982 https://pubmed.ncbi.nlm.nih.gov/33862084 https://pubmed.ncbi.nlm.nih.gov/33804804 https://pubmed.ncbi.nlm.nih.gov/33793060 https://pubmed.ncbi.nlm.nih.gov/33604770 https://pubmed.ncbi.nlm.nih.gov/33578613 https://pubmed.ncbi.nlm.nih.gov/33524391 https://pubmed.ncbi.nlm.nih.gov/33418576 https://pubmed.ncbi.nlm.nih.gov/33326461 https://pubmed.ncbi.nlm.nih.go…	https://pubmed.ncbi.nlm.nih.gov/34557544 https://pubmed.ncbi.nlm.nih.gov/34458345 https://pubmed.ncbi.nlm.nih.gov/34456633 https://pubmed.ncbi.nlm.nih.gov/34455150 https://pubmed.ncbi.nlm.nih.gov/34421998 https://pubmed.ncbi.nlm.nih.gov/34383982 https://pubmed.ncbi.nlm.nih.gov/34370993 https://pubmed.ncbi.nlm.nih.gov/34332399 https://pubmed.ncbi.nlm.nih.gov/34302998 https://pubmed.ncbi.nlm.nih.go…
ENSG00000133703	KRAS	10428.7	1.35148	3.43429e-05	0.0154728
ENSG00000198838	RYR3	9.03307	-4.42119	3.44819e-05	0.0154728	Y	ryanodine receptor 3	RYR-3	ryanodine receptor 3|brain ryanodine receptor-calcium release channel|brain-type ryanodine receptor|type 3 ryanodine receptor	ryanodine receptor 3	https://www.ensembl.org/Homo_sapiens/Gene/ExpressionAtlas?g=ENSG00000198838	http://www.ensembl.org/id/ENSG00000198838	https://www.ncbi.nlm.nih.gov/gene?term=(RYR3[Gene Name]) AND Homo sapiens[Organism]	https://pubmed.ncbi.nlm.nih.gov/34530606 https://pubmed.ncbi.nlm.nih.gov/34472451 https://pubmed.ncbi.nlm.nih.gov/34414986 https://pubmed.ncbi.nlm.nih.gov/34127251 https://pubmed.ncbi.nlm.nih.gov/34125209 https://pubmed.ncbi.nlm.nih.gov/34072954 https://pubmed.ncbi.nlm.nih.gov/34062866 https://pubmed.ncbi.nlm.nih.gov/34022226 https://pubmed.ncbi.nlm.nih.gov/33881608 https://pubmed.ncbi.nlm.nih.go…	https://pubmed.ncbi.nlm.nih.gov/34530606 https://pubmed.ncbi.nlm.nih.gov/34472451 https://pubmed.ncbi.nlm.nih.gov/34414986 https://pubmed.ncbi.nlm.nih.gov/34127251 https://pubmed.ncbi.nlm.nih.gov/34125209 https://pubmed.ncbi.nlm.nih.gov/34072954 https://pubmed.ncbi.nlm.nih.gov/34062866 https://pubmed.ncbi.nlm.nih.gov/34022226 https://pubmed.ncbi.nlm.nih.gov/33881608 https://pubmed.ncbi.nlm.nih.go…	https://pubmed.ncbi.nlm.nih.gov/34557192 https://pubmed.ncbi.nlm.nih.gov/34533024 https://pubmed.ncbi.nlm.nih.gov/34530606 https://pubmed.ncbi.nlm.nih.gov/34472451 https://pubmed.ncbi.nlm.nih.gov/34469755 https://pubmed.ncbi.nlm.nih.gov/34455637 https://pubmed.ncbi.nlm.nih.gov/34446197 https://pubmed.ncbi.nlm.nih.gov/34434232 https://pubmed.ncbi.nlm.nih.gov/34419737 https://pubmed.ncbi.nlm.nih.go…
ENSG00000159023	EPB41	531.56	1.06231	3.62939e-05	0.0158457
ENSG00000118523	CCN2	709.642	-1.5672	3.89119e-05	0.0165416
ENSG00000091844	RGS17	471.344	1.90574	4.50088e-05	0.0186429
ENSG00000111186	WNT5B	270.512	-1.765	4.67075e-05	0.0187594
ENSG00000164082	GRM2	10.572	-3.42396	4.81256e-05	0.0187594	Y	glutamate metabotropic receptor 2	GLUR2, GPRC1B, MGLUR2, mGlu2	metabotropic glutamate receptor 2|glutamate receptor homolog|glutamate receptor, metabotropic 2	glutamate metabotropic receptor 2	https://www.ensembl.org/Homo_sapiens/Gene/ExpressionAtlas?g=ENSG00000164082	http://www.ensembl.org/id/ENSG00000164082	https://www.ncbi.nlm.nih.gov/gene?term=(GRM2[Gene Name]) AND Homo sapiens[Organism]	https://pubmed.ncbi.nlm.nih.gov/34321217 https://pubmed.ncbi.nlm.nih.gov/34079054 https://pubmed.ncbi.nlm.nih.gov/31743624 https://pubmed.ncbi.nlm.nih.gov/30326345 https://pubmed.ncbi.nlm.nih.gov/30124166 https://pubmed.ncbi.nlm.nih.gov/29662945 https://pubmed.ncbi.nlm.nih.gov/29069363 https://pubmed.ncbi.nlm.nih.gov/28841467 https://pubmed.ncbi.nlm.nih.gov/30695556 https://pubmed.ncbi.nlm.nih.go…	https://pubmed.ncbi.nlm.nih.gov/34321217 https://pubmed.ncbi.nlm.nih.gov/34079054 https://pubmed.ncbi.nlm.nih.gov/31743624 https://pubmed.ncbi.nlm.nih.gov/30326345 https://pubmed.ncbi.nlm.nih.gov/30124166 https://pubmed.ncbi.nlm.nih.gov/29662945 https://pubmed.ncbi.nlm.nih.gov/29069363 https://pubmed.ncbi.nlm.nih.gov/28841467 https://pubmed.ncbi.nlm.nih.gov/30695556 https://pubmed.ncbi.nlm.nih.go…	https://pubmed.ncbi.nlm.nih.gov/34387961 https://pubmed.ncbi.nlm.nih.gov/34321217 https://pubmed.ncbi.nlm.nih.gov/34079054 https://pubmed.ncbi.nlm.nih.gov/33763934 https://pubmed.ncbi.nlm.nih.gov/33659799 https://pubmed.ncbi.nlm.nih.gov/33627638 https://pubmed.ncbi.nlm.nih.gov/33503881 https://pubmed.ncbi.nlm.nih.gov/33412755 https://pubmed.ncbi.nlm.nih.gov/33178313 https://pubmed.ncbi.nlm.nih.go…
ENSG00000233117	LINC00702	104.572	-1.88314	5.06651e-05	0.0187594
ENSG00000235750	KIAA0040	1203.89	1.65561	5.08596e-05	0.0187594
ENSG00000135519	KCNH3	49.3466	-1.69171	5.10965e-05	0.0187594
ENSG00000197429	IPP	204.567	1.35389	5.46813e-05	0.0196294
ENSG00000134874	DZIP1	602.639	1.07554	5.74357e-05	0.0201699
ENSG00000116285	ERRFI1	5717.52	1.94333	6.00132e-05	0.0202238
ENSG00000120279	MYCT1	5.24772	-6.52112	6.03062e-05	0.0202238	Y	MYC target 1	MTLC	myc target protein 1|myc target in myeloid cells 1|myc target in myeloid cells protein 1	MYC target 1	https://www.ensembl.org/Homo_sapiens/Gene/ExpressionAtlas?g=ENSG00000120279	http://www.ensembl.org/id/ENSG00000120279	https://www.ncbi.nlm.nih.gov/gene?term=(MYCT1[Gene Name]) AND Homo sapiens[Organism]	https://pubmed.ncbi.nlm.nih.gov/33658356 https://pubmed.ncbi.nlm.nih.gov/32778238 https://pubmed.ncbi.nlm.nih.gov/31152622 https://pubmed.ncbi.nlm.nih.gov/30982352 https://pubmed.ncbi.nlm.nih.gov/29764119 https://pubmed.ncbi.nlm.nih.gov/29322514 https://pubmed.ncbi.nlm.nih.gov/28485541 https://pubmed.ncbi.nlm.nih.gov/27072211 https://pubmed.ncbi.nlm.nih.gov/26710964 https://pubmed.ncbi.nlm.nih.go…	https://pubmed.ncbi.nlm.nih.gov/33658356 https://pubmed.ncbi.nlm.nih.gov/32778238 https://pubmed.ncbi.nlm.nih.gov/31152622 https://pubmed.ncbi.nlm.nih.gov/30982352 https://pubmed.ncbi.nlm.nih.gov/29764119 https://pubmed.ncbi.nlm.nih.gov/29322514 https://pubmed.ncbi.nlm.nih.gov/28485541 https://pubmed.ncbi.nlm.nih.gov/27072211 https://pubmed.ncbi.nlm.nih.gov/26710964 https://pubmed.ncbi.nlm.nih.go…	https://pubmed.ncbi.nlm.nih.gov/33680912 https://pubmed.ncbi.nlm.nih.gov/33658356 https://pubmed.ncbi.nlm.nih.gov/33377576 https://pubmed.ncbi.nlm.nih.gov/33069162 https://pubmed.ncbi.nlm.nih.gov/32778238 https://pubmed.ncbi.nlm.nih.gov/32659265 https://pubmed.ncbi.nlm.nih.gov/32615048 https://pubmed.ncbi.nlm.nih.gov/31152622 https://pubmed.ncbi.nlm.nih.gov/30982352 https://pubmed.ncbi.nlm.nih.go…
ENSG00000117632	STMN1	2706.52	1.03467	6.25412e-05	0.0202238
ENSG00000151790	TDO2	42.3566	-2.31245	6.2597e-05	0.0202238	Y	tryptophan 2,3-dioxygenase	HYPTRP, TDO, TO, TPH2, TRPO	tryptophan 2,3-dioxygenase|tryptamin 2,3-dioxygenase|tryptophan oxygenase|tryptophan pyrrolase|tryptophanase	tryptophan 2,3-dioxygenase	https://www.ensembl.org/Homo_sapiens/Gene/ExpressionAtlas?g=ENSG00000151790	http://www.ensembl.org/id/ENSG00000151790	https://www.ncbi.nlm.nih.gov/gene?term=(TDO2[Gene Name]) AND Homo sapiens[Organism]	https://pubmed.ncbi.nlm.nih.gov/34372858 https://pubmed.ncbi.nlm.nih.gov/34245611 https://pubmed.ncbi.nlm.nih.gov/34051337 https://pubmed.ncbi.nlm.nih.gov/33261077 https://pubmed.ncbi.nlm.nih.gov/33045014 https://pubmed.ncbi.nlm.nih.gov/32951108 https://pubmed.ncbi.nlm.nih.gov/32843490 https://pubmed.ncbi.nlm.nih.gov/32818467 https://pubmed.ncbi.nlm.nih.gov/32674273 https://pubmed.ncbi.nlm.nih.go…	https://pubmed.ncbi.nlm.nih.gov/34372858 https://pubmed.ncbi.nlm.nih.gov/34245611 https://pubmed.ncbi.nlm.nih.gov/34051337 https://pubmed.ncbi.nlm.nih.gov/33261077 https://pubmed.ncbi.nlm.nih.gov/33045014 https://pubmed.ncbi.nlm.nih.gov/32951108 https://pubmed.ncbi.nlm.nih.gov/32843490 https://pubmed.ncbi.nlm.nih.gov/32818467 https://pubmed.ncbi.nlm.nih.gov/32674273 https://pubmed.ncbi.nlm.nih.go…	https://pubmed.ncbi.nlm.nih.gov/34562469 https://pubmed.ncbi.nlm.nih.gov/34557456 https://pubmed.ncbi.nlm.nih.gov/34529208 https://pubmed.ncbi.nlm.nih.gov/34518517 https://pubmed.ncbi.nlm.nih.gov/34423034 https://pubmed.ncbi.nlm.nih.gov/34372858 https://pubmed.ncbi.nlm.nih.gov/34367262 https://pubmed.ncbi.nlm.nih.gov/34338527 https://pubmed.ncbi.nlm.nih.gov/34259140 https://pubmed.ncbi.nlm.nih.go…
ENSG00000130821	SLC6A8	371.053	-1.51706	6.38862e-05	0.0202356
ENSG00000001460	STPG1	78.4227	1.5735	6.66625e-05	0.0207089
ENSG00000146674	IGFBP3	466.369	1.45395	7.34755e-05	0.0223948
ENSG00000026751	SLAMF7	7.6115	-4.53536	8.32385e-05	0.0249006	Y	SLAM family member 7	19A, CD319, CRACC, CS1	SLAM family member 7|19A24 protein|CD2 subset 1|CD2-like receptor activating cytotoxic cells|membrane protein FOAP-12|novel LY9 (lymphocyte antigen 9) like protein|protein 19A	SLAM family member 7	https://www.ensembl.org/Homo_sapiens/Gene/ExpressionAtlas?g=ENSG00000026751	http://www.ensembl.org/id/ENSG00000026751	https://www.ncbi.nlm.nih.gov/gene?term=(SLAMF7[Gene Name]) AND Homo sapiens[Organism]	https://pubmed.ncbi.nlm.nih.gov/34497204 https://pubmed.ncbi.nlm.nih.gov/34357379 https://pubmed.ncbi.nlm.nih.gov/34282004 https://pubmed.ncbi.nlm.nih.gov/34108322 https://pubmed.ncbi.nlm.nih.gov/34048683 https://pubmed.ncbi.nlm.nih.gov/33828555 https://pubmed.ncbi.nlm.nih.gov/33746969 https://pubmed.ncbi.nlm.nih.gov/33739965 https://pubmed.ncbi.nlm.nih.gov/33575947 https://pubmed.ncbi.nlm.nih.go…	https://pubmed.ncbi.nlm.nih.gov/34497204 https://pubmed.ncbi.nlm.nih.gov/34357379 https://pubmed.ncbi.nlm.nih.gov/34282004 https://pubmed.ncbi.nlm.nih.gov/34108322 https://pubmed.ncbi.nlm.nih.gov/34048683 https://pubmed.ncbi.nlm.nih.gov/33828555 https://pubmed.ncbi.nlm.nih.gov/33746969 https://pubmed.ncbi.nlm.nih.gov/33739965 https://pubmed.ncbi.nlm.nih.gov/33575947 https://pubmed.ncbi.nlm.nih.go…	https://pubmed.ncbi.nlm.nih.gov/34527606 https://pubmed.ncbi.nlm.nih.gov/34510493 https://pubmed.ncbi.nlm.nih.gov/34497204 https://pubmed.ncbi.nlm.nih.gov/34488679 https://pubmed.ncbi.nlm.nih.gov/34461858 https://pubmed.ncbi.nlm.nih.gov/34357379 https://pubmed.ncbi.nlm.nih.gov/34322356 https://pubmed.ncbi.nlm.nih.gov/34321081 https://pubmed.ncbi.nlm.nih.gov/34307150 https://pubmed.ncbi.nlm.nih.go…
ENSG00000185112	FAM43A	552.726	-1.03879	9.04118e-05	0.0260694
ENSG00000142794	NBPF3	173.265	1.35596	9.09728e-05	0.0260694
ENSG00000120656	TAF12	202.754	1.418	9.22314e-05	0.0260694
ENSG00000079263	SP140	125.773	-1.78112	9.36005e-05	0.0260694
ENSG00000151640	DPYSL4	8.37908	-4.36413	9.67916e-05	0.0265012	Y	dihydropyrimidinase like 4	CRMP3, DRP-4, ULIP4	dihydropyrimidinase-related protein 4|CRMP-3|ULIP-4|UNC33-like phosphoprotein 4|collapsin response mediator protein 3	dihydropyrimidinase like 4	https://www.ensembl.org/Homo_sapiens/Gene/ExpressionAtlas?g=ENSG00000151640	http://www.ensembl.org/id/ENSG00000151640	https://www.ncbi.nlm.nih.gov/gene?term=(DPYSL4[Gene Name]) AND Homo sapiens[Organism]	https://pubmed.ncbi.nlm.nih.gov/32388501 https://pubmed.ncbi.nlm.nih.gov/31790363 https://pubmed.ncbi.nlm.nih.gov/30061407 https://pubmed.ncbi.nlm.nih.gov/26522113 https://pubmed.ncbi.nlm.nih.gov/26293908 https://pubmed.ncbi.nlm.nih.gov/24681432 https://pubmed.ncbi.nlm.nih.gov/23443259 https://pubmed.ncbi.nlm.nih.gov/21791222 https://pubmed.ncbi.nlm.nih.gov/20499313 https://pubmed.ncbi.nlm.nih.go…	https://pubmed.ncbi.nlm.nih.gov/32388501 https://pubmed.ncbi.nlm.nih.gov/31790363 https://pubmed.ncbi.nlm.nih.gov/30061407 https://pubmed.ncbi.nlm.nih.gov/26522113 https://pubmed.ncbi.nlm.nih.gov/26293908 https://pubmed.ncbi.nlm.nih.gov/24681432 https://pubmed.ncbi.nlm.nih.gov/23443259 https://pubmed.ncbi.nlm.nih.gov/21791222 https://pubmed.ncbi.nlm.nih.gov/20499313 https://pubmed.ncbi.nlm.nih.go…	https://pubmed.ncbi.nlm.nih.gov/33624645 https://pubmed.ncbi.nlm.nih.gov/33226471 https://pubmed.ncbi.nlm.nih.gov/33150595 https://pubmed.ncbi.nlm.nih.gov/32388501 https://pubmed.ncbi.nlm.nih.gov/31790363 https://pubmed.ncbi.nlm.nih.gov/30061407 https://pubmed.ncbi.nlm.nih.gov/26522113 https://pubmed.ncbi.nlm.nih.gov/26293908 https://pubmed.ncbi.nlm.nih.gov/24681432 https://pubmed.ncbi.nlm.nih.go…
ENSG00000256235	SMIM3	615.122	1.7159	0.000109443	0.0294657
ENSG00000184588	PDE4B	902.778	1.12571	0.000111364	0.0294913
ENSG00000101335	MYL9	302.838	-1.61502	0.000119095	0.0307888
ENSG00000139973	SYT16	82.2176	-2.41226	0.00012074	0.0307888	Y	synaptotagmin 16	CHR14SYT, SYT14L, Strep14, syt14r	synaptotagmin-16|chr14 synaptotagmin|synaptotagmin 14-like protein|synaptotagmin XIV-related protein|synaptotagmin XVI	synaptotagmin 16	https://www.ensembl.org/Homo_sapiens/Gene/ExpressionAtlas?g=ENSG00000139973	http://www.ensembl.org/id/ENSG00000139973	https://www.ncbi.nlm.nih.gov/gene?term=(SYT16[Gene Name]) AND Homo sapiens[Organism]	https://pubmed.ncbi.nlm.nih.gov/32894758 https://pubmed.ncbi.nlm.nih.gov/32289666 https://pubmed.ncbi.nlm.nih.gov/31003110 https://pubmed.ncbi.nlm.nih.gov/28005267	https://pubmed.ncbi.nlm.nih.gov/32894758 https://pubmed.ncbi.nlm.nih.gov/32289666 https://pubmed.ncbi.nlm.nih.gov/31003110 https://pubmed.ncbi.nlm.nih.gov/28005267	https://pubmed.ncbi.nlm.nih.gov/32894758 https://pubmed.ncbi.nlm.nih.gov/32289666 https://pubmed.ncbi.nlm.nih.gov/31003110 https://pubmed.ncbi.nlm.nih.gov/28005267
ENSG00000160179	ABCG1	108.985	2.46607	0.000121981	0.0307888	Y	ATP binding cassette subfamily G member 1	ABC8, WHITE1	ATP-binding cassette sub-family G member 1|ABC transporter 8|ATP-binding cassette transporter 8|ATP-binding cassette transporter member 1 of subfamily G|ATP-binding cassette, sub-family G (WHITE), member 1|homolog of Drosophila white|white protein homolog (ATP-binding cassette transporter 8)	ATP binding cassette subfamily G member 1	https://www.ensembl.org/Homo_sapiens/Gene/ExpressionAtlas?g=ENSG00000160179	http://www.ensembl.org/id/ENSG00000160179	https://www.ncbi.nlm.nih.gov/gene?term=(ABCG1[Gene Name]) AND Homo sapiens[Organism]	https://pubmed.ncbi.nlm.nih.gov/34445501 https://pubmed.ncbi.nlm.nih.gov/34313419 https://pubmed.ncbi.nlm.nih.gov/34281263 https://pubmed.ncbi.nlm.nih.gov/34244494 https://pubmed.ncbi.nlm.nih.gov/34212313 https://pubmed.ncbi.nlm.nih.gov/34080258 https://pubmed.ncbi.nlm.nih.gov/33959213 https://pubmed.ncbi.nlm.nih.gov/33836456 https://pubmed.ncbi.nlm.nih.gov/33802600 https://pubmed.ncbi.nlm.nih.go…	https://pubmed.ncbi.nlm.nih.gov/34445501 https://pubmed.ncbi.nlm.nih.gov/34313419 https://pubmed.ncbi.nlm.nih.gov/34281263 https://pubmed.ncbi.nlm.nih.gov/34244494 https://pubmed.ncbi.nlm.nih.gov/34212313 https://pubmed.ncbi.nlm.nih.gov/34080258 https://pubmed.ncbi.nlm.nih.gov/33959213 https://pubmed.ncbi.nlm.nih.gov/33836456 https://pubmed.ncbi.nlm.nih.gov/33802600 https://pubmed.ncbi.nlm.nih.go…	https://pubmed.ncbi.nlm.nih.gov/34539880 https://pubmed.ncbi.nlm.nih.gov/34505223 https://pubmed.ncbi.nlm.nih.gov/34485530 https://pubmed.ncbi.nlm.nih.gov/34468868 https://pubmed.ncbi.nlm.nih.gov/34461069 https://pubmed.ncbi.nlm.nih.gov/34445501 https://pubmed.ncbi.nlm.nih.gov/34404721 https://pubmed.ncbi.nlm.nih.gov/34400307 https://pubmed.ncbi.nlm.nih.gov/34394055 https://pubmed.ncbi.nlm.nih.go…
ENSG00000248719	AC021127.1	20.828	3.18776	0.000127689	0.0317337	Y					https://www.ensembl.org/Homo_sapiens/Gene/ExpressionAtlas?g=ENSG00000248719	http://www.ensembl.org/id/ENSG00000248719	https://www.ncbi.nlm.nih.gov/gene?term=(AC021127.1[Gene Name]) AND Homo sapiens[Organism]
ENSG00000254092	AC021613.1	5.37812	-5.76632	0.000132949	0.0325404	Y					https://www.ensembl.org/Homo_sapiens/Gene/ExpressionAtlas?g=ENSG00000254092	http://www.ensembl.org/id/ENSG00000254092	https://www.ncbi.nlm.nih.gov/gene?term=(AC021613.1[Gene Name]) AND Homo sapiens[Organism]
ENSG00000125945	ZNF436	184.265	1.33363	0.000145216	0.034561
ENSG00000034152	MAP2K3	148.556	-1.258	0.000145484	0.034561
ENSG00000058668	ATP2B4	1621.18	1.32405	0.000149697	0.034854
ENSG00000163683	SMIM14	103.305	1.48893	0.000151033	0.034854
ENSG00000104321	TRPA1	2526.31	1.33856	0.000155109	0.0352906
ENSG00000180340	FZD2	201.934	-1.33523	0.000159595	0.035807
ENSG00000162512	SDC3	540.871	1.04031	0.000164327	0.0363253
ENSG00000156453	PCDH1	96.439	-1.63667	0.000166403	0.0363253
ENSG00000151136	BTBD11	1288.2	1.13142	0.000177608	0.0375613
ENSG00000077420	APBB1IP	40.1257	-1.66189	0.00017874	0.0375613
ENSG00000166068	SPRED1	4025.48	1.25016	0.00018187	0.0375613
ENSG00000177108	ZDHHC22	86.7587	-1.63678	0.000182891	0.0375613
ENSG00000116514	RNF19B	314.588	1.53835	0.000183691	0.0375613
ENSG00000177181	RIMKLA	235.266	1.50559	0.000196056	0.0395886
ENSG00000196092	PAX5	24.5602	-2.66253	0.00020081	0.0400479	Y	paired box 5	ALL3, BSAP	paired box protein Pax-5|B-cell lineage specific activator|paired box homeotic gene 5|paired domain gene 5|transcription factor PAX 5	paired box 5	https://www.ensembl.org/Homo_sapiens/Gene/ExpressionAtlas?g=ENSG00000196092	http://www.ensembl.org/id/ENSG00000196092	https://www.ncbi.nlm.nih.gov/gene?term=(PAX5[Gene Name]) AND Homo sapiens[Organism]	https://pubmed.ncbi.nlm.nih.gov/34347801 https://pubmed.ncbi.nlm.nih.gov/34288263 https://pubmed.ncbi.nlm.nih.gov/34066151 https://pubmed.ncbi.nlm.nih.gov/34041745 https://pubmed.ncbi.nlm.nih.gov/33853962 https://pubmed.ncbi.nlm.nih.gov/33789373 https://pubmed.ncbi.nlm.nih.gov/33774278 https://pubmed.ncbi.nlm.nih.gov/33750258 https://pubmed.ncbi.nlm.nih.gov/33716241 https://pubmed.ncbi.nlm.nih.go…	https://pubmed.ncbi.nlm.nih.gov/34347801 https://pubmed.ncbi.nlm.nih.gov/34288263 https://pubmed.ncbi.nlm.nih.gov/34066151 https://pubmed.ncbi.nlm.nih.gov/34041745 https://pubmed.ncbi.nlm.nih.gov/33853962 https://pubmed.ncbi.nlm.nih.gov/33789373 https://pubmed.ncbi.nlm.nih.gov/33774278 https://pubmed.ncbi.nlm.nih.gov/33750258 https://pubmed.ncbi.nlm.nih.gov/33716241 https://pubmed.ncbi.nlm.nih.go…	https://pubmed.ncbi.nlm.nih.gov/34560683 https://pubmed.ncbi.nlm.nih.gov/34547766 https://pubmed.ncbi.nlm.nih.gov/34539733 https://pubmed.ncbi.nlm.nih.gov/34535769 https://pubmed.ncbi.nlm.nih.gov/34530906 https://pubmed.ncbi.nlm.nih.gov/34520518 https://pubmed.ncbi.nlm.nih.gov/34513684 https://pubmed.ncbi.nlm.nih.gov/34511545 https://pubmed.ncbi.nlm.nih.gov/34503197 https://pubmed.ncbi.nlm.nih.go…
ENSG00000178031	ADAMTSL1	82.1623	-1.93349	0.000225756	0.0444739
ENSG00000088280	ASAP3	324.963	1.24395	0.000248936	0.0484495
ENSG00000142687	KIAA0319L	807.164	0.905467	0.000255587	0.0491519
ENSG00000152217	SETBP1	529.352	1.16495	0.00027778	0.0513734
ENSG00000184524	CEND1	29.4873	-1.93494	0.000280963	0.0513734
ENSG00000130023	ERMARD	173.638	1.08672	0.000282592	0.0513734
ENSG00000185070	FLRT2	251.298	-1.31741	0.000283653	0.0513734
ENSG00000023892	DEF6	38.6967	2.04713	0.000285326	0.0513734
ENSG00000116171	SCP2	835.822	1.12639	0.000286221	0.0513734
ENSG00000146197	SCUBE3	487.628	1.57546	0.000290492	0.0515672
ENSG00000107815	TWNK	700.387	-1.02214	0.00030443	0.053454
ENSG00000172061	LRRC15	9.7592	-3.38817	0.00030866	0.053614
ENSG00000130695	CEP85	695.737	0.895694	0.000349336	0.0600338
ENSG00000006459	KDM7A	200.02	1.64119	0.000358975	0.0610408
ENSG00000161011	SQSTM1	3657.11	-0.833839	0.000367292	0.0613331
ENSG00000233016	SNHG7	538.743	-0.92102	0.000368287	0.0613331
ENSG00000100626	GALNT16	276.267	-1.32736	0.000391059	0.0642878
ENSG00000111860	CEP85L	244.508	1.17398	0.000393988	0.0642878
ENSG00000144583	MARCH4	455.45	-1.64218	0.000398256	0.0643343
ENSG00000197712	FAM114A1	91.3206	1.28968	0.000413762	0.066051
ENSG00000116497	S100PBP	414.252	1.08098	0.000417649	0.066051
ENSG00000080166	DCT	4.5094	-5.52647	0.000425293	0.066051
ENSG00000136997	MYC	171.916	-1.27241	0.000428732	0.066051
ENSG00000100314	CABP7	111.264	1.25934	0.000435526	0.066051
ENSG00000117758	STX12	191.027	1.17884	0.000436418	0.066051
ENSG00000171992	SYNPO	371.639	-1.1845	0.000438581	0.066051
ENSG00000240891	PLCXD2	203.565	-1.20534	0.000441594	0.066051
ENSG00000107521	HPS1	304.055	-1.30194	0.000483641	0.0716764
ENSG00000162415	ZSWIM5	78.5608	1.50933	0.000506502	0.0743821
ENSG00000106688	SLC1A1	226.645	1.3724	0.000513179	0.0746838
ENSG00000259959	AC107068.1	43.7772	2.021	0.00052938	0.0758093
ENSG00000079691	CARMIL1	231.502	1.0559	0.000534474	0.0758093
ENSG00000249550	LINC01234	9.6528	-3.79721	0.000534992	0.0758093
ENSG00000184005	ST6GALNAC3	36.0243	2.29438	0.000547464	0.076902
ENSG00000119714	GPR68	48.6182	2.97191	0.000556592	0.0775102
ENSG00000125848	FLRT3	130.317	2.46467	0.000568082	0.0784341
ENSG00000142784	WDTC1	341.341	1.20719	0.000575949	0.0788058
ENSG00000127483	HP1BP3	1754.22	0.83952	0.000580531	0.0788058
ENSG00000092853	CLSPN	977.573	1.13523	0.000586445	0.0789453
ENSG00000139220	PPFIA2	20.2586	-1.98764	0.000601443	0.0802951
ENSG00000162600	OMA1	138.166	1.27012	0.000610326	0.0808131
ENSG00000120875	DUSP4	1481.39	1.08076	0.000624015	0.0819539
ENSG00000162521	RBBP4	1680.02	0.785275	0.000638674	0.0832028
ENSG00000117859	OSBPL9	1539.07	0.877176	0.000664221	0.0852521
ENSG00000130203	APOE	42.1671	-2.18518	0.00066496	0.0852521
ENSG00000185904	LINC00839	396.923	-0.910722	0.000687694	0.0874725
ENSG00000178462	TUBAL3	32.6683	-1.69156	0.000701561	0.0885391
ENSG00000130477	UNC13A	464.557	-1.16611	0.00070891	0.0887731
ENSG00000171873	ADRA1D	12.985	-2.60647	0.00078248	0.0972321
ENSG00000116198	CEP104	434.122	0.904549	0.000788852	0.0972757
ENSG00000168209	DDIT4	445.179	1.36096	0.000808027	0.0987566
ENSG00000189042	ZNF567	3.52094	-5.94283	0.000811689
ENSG00000137414	FAM8A1	171.854	1.027	0.000813088	0.0987566
ENSG00000048707	VPS13D	1345.65	0.92755	0.000830214	0.100084
ENSG00000266524	GDF10	10.5481	-3.05118	0.000845378	0.100434
ENSG00000065060	UHRF1BP1	615.316	0.892304	0.000845549	0.100434
ENSG00000234444	ZNF736	26.1344	2.92229	0.000861729	0.101461
ENSG00000167123	CERCAM	924.874	-0.951679	0.000866756	0.101461
ENSG00000069482	GAL	113.656	-1.36445	0.000873691	0.101537
ENSG00000020577	SAMD4A	394.825	-0.917658	0.000887212	0.102372
ENSG00000178150	ZNF114	87.4759	-1.91129	0.000903601	0.103523
ENSG00000169914	OTUD3	200.171	1.03039	0.000913771	0.103951
ENSG00000075151	EIF4G3	1644.34	0.775186	0.000926872	0.104704
ENSG00000187800	PEAR1	144.668	-1.41362	0.000944571	0.105639
ENSG00000138207	RBP4	26.8154	-2.23179	0.000948222	0.105639
ENSG00000196353	CPNE4	6.0053	-4.3996	0.000970185	0.107345
ENSG00000204084	INPP5B	401.807	1.17936	0.000998729	0.109752
ENSG00000071991	CDH19	3.30054	-5.83376	0.00100586
ENSG00000117676	RPS6KA1	588.809	1.08468	0.00101256	0.11052
ENSG00000180730	SHISA2	183.973	2.0372	0.00102926	0.111589
ENSG00000249484	LINC01470	6.17941	-3.83168	0.00104456	0.112492
ENSG00000170345	FOS	935.225	1.41442	0.00108953	0.116558
ENSG00000196535	MYO18A	523.142	1.2787	0.0011046	0.117188
ENSG00000180626	ZNF594	53.5934	-1.3306	0.00112325	0.117188
ENSG00000125772	GPCPD1	210.664	1.30848	0.00113045	0.117188
ENSG00000117054	ACADM	460.69	0.959182	0.00113048	0.117188
ENSG00000187678	SPRY4	1663.5	0.873678	0.00113169	0.117188
ENSG00000160050	CCDC28B	72.5048	1.61536	0.00114299	0.117264
ENSG00000125249	RAP2A	591.719	1.01333	0.00116229	0.117264
ENSG00000173614	NMNAT1	130.584	1.09698	0.00116466	0.117264
ENSG00000158296	SLC13A3	290.191	-0.964907	0.00116653	0.117264
ENSG00000137171	KLC4	125.735	1.08988	0.00116872	0.117264
ENSG00000148688	RPP30	528.717	-0.870243	0.00120254	0.119512
ENSG00000107807	TLX1	27.2949	-1.84335	0.00120592	0.119512
ENSG00000060656	PTPRU	559.364	1.18076	0.00122598	0.120759
ENSG00000197355	UAP1L1	357.711	-1.20998	0.00124084	0.120825
ENSG00000220635	KRASP1	654.469	0.921609	0.00124161	0.120825
ENSG00000256546	AC156455.1	150.147	-1.02881	0.00127038	0.122884
ENSG00000121903	ZSCAN20	120.902	1.38786	0.00128041	0.123117
ENSG00000107821	KAZALD1	285.834	-1.24568	0.00128932	0.123241
ENSG00000087245	MMP2	1213.87	-1.02076	0.00129743	0.123287
ENSG00000157168	NRG1	286.512	-1.15648	0.00131001	0.123754
ENSG00000108179	PPIF	1414.21	-1.03565	0.00132906	0.124824
ENSG00000123094	RASSF8	1350.16	1.26019	0.0013595	0.126841
ENSG00000164761	TNFRSF11B	1233.2	3.46925	0.00136624	0.126841
ENSG00000185189	NRBP2	132.02	1.58477	0.00142777	0.131796
ENSG00000142798	HSPG2	3174.48	3.11629	0.00145269	0.133334
ENSG00000140853	NLRC5	254.71	-0.923865	0.00147834	0.134091
ENSG00000188191	PRKAR1B	183.587	-1.1353	0.00148587	0.134091
ENSG00000164751	PEX2	280.389	0.940149	0.00148666	0.134091
ENSG00000087085	ACHE	14.3872	-2.24879	0.00149722	0.134091
ENSG00000243701	DUBR	140.788	-1.14215	0.00150244	0.134091
ENSG00000198363	ASPH	3904.64	0.985623	0.00151134	0.134119
ENSG00000116017	ARID3A	330.096	0.966723	0.00152025	0.134119
ENSG00000170390	DCLK2	44.7375	-1.39777	0.00152766	0.134119
ENSG00000168032	ENTPD3	34.9027	1.904	0.00154138	0.134148
ENSG00000008324	SS18L2	199.212	-1.13	0.0015446	0.134148
ENSG00000121310	ECHDC2	203.578	1.10679	0.00156537	0.135224
ENSG00000173715	C11orf80	173.461	1.14878	0.00158826	0.136445
ENSG00000121743	GJA3	120.887	1.10581	0.00159639	0.136445
ENSG00000156521	TYSND1	327.786	-0.943202	0.00162575	0.138146
ENSG00000158161	EYA3	730.28	1.17015	0.00163339	0.138146
ENSG00000184007	PTP4A2	2100.88	0.860722	0.00166182	0.138798
ENSG00000276850	AC245041.2	7.67152	-2.97911	0.0016698	0.138798
ENSG00000181541	MAB21L2	43.1524	-1.62769	0.00167434	0.138798
ENSG00000182871	COL18A1	680.971	1.03014	0.00167548	0.138798
ENSG00000183484	GPR132	61.3886	1.2994	0.00169022	0.139306
ENSG00000124783	SSR1	1293.4	0.934344	0.00174615	0.142714
ENSG00000108176	DNAJC12	15.4595	-2.15419	0.00174925	0.142714
ENSG00000184185	KCNJ12	8.52784	-3.62481	0.00181623	0.147434
ENSG00000137038	DMAC1	477.627	-0.873906	0.00189543	0.152554
ENSG00000212464	SNORA12	210.296	-1.14318	0.00189819	0.152554
ENSG00000183798	EMILIN3	75.2082	-1.634	0.00192123	0.153428
ENSG00000134744	TUT4	745.138	0.890613	0.00192806	0.153428
ENSG00000140416	TPM1	3301.82	-0.846759	0.00194662	0.15374
ENSG00000185442	FAM174B	56.6354	1.37074	0.00195101	0.15374
ENSG00000074800	ENO1	48595.1	0.785146	0.00196161	0.153824
ENSG00000201302	SNORA65	61.6607	-1.32893	0.00197978	0.154499
ENSG00000258791	LINC00520	5.04133	-4.47205	0.00200991	0.156097
ENSG00000116205	TCEANC2	190.786	0.988735	0.00207861	0.16066
ENSG00000001617	SEMA3F	104.192	-1.56925	0.00209314	0.161012
ENSG00000160801	PTH1R	11.2326	-3.36827	0.00212497	0.162686
ENSG00000139289	PHLDA1	5096.67	1.16259	0.00214543	0.163477
ENSG00000236256	DIAPH2-AS1	4.34234	-4.63603	0.00214784
ENSG00000153832	FBXO36	72.6662	1.58308	0.00216318	0.164056
ENSG00000082126	MPP4	150.222	-1.59765	0.00218056	0.164602
ENSG00000158195	WASF2	2087.78	0.88466	0.00224974	0.168083
ENSG00000104447	TRPS1	766.392	0.930754	0.00225439	0.168083
ENSG00000117000	RLF	577.238	0.816957	0.0022579	0.168083
ENSG00000174059	CD34	7.21707	-3.27987	0.00229514	0.170072
ENSG00000261534	AL596244.1	84.19	-1.07587	0.00231654	0.170874
ENSG00000173915	ATP5MD	492.868	-0.921428	0.00236161	0.173407
ENSG00000162378	ZYG11B	541.236	0.862256	0.00238411	0.174267
ENSG00000205213	LGR4	255.185	1.0086	0.00239993	0.174633
ENSG00000146094	DOK3	44.0849	-1.43905	0.0024297	0.176006
ENSG00000005020	SKAP2	357.565	0.871215	0.0024643	0.177103
ENSG00000229771	AL035665.1	15.7719	2.89139	0.00246677	0.177103
ENSG00000119986	AVPI1	47.2317	-1.28719	0.00249529	0.17735
ENSG00000137819	PAQR5	190.128	1.82874	0.00249955	0.17735
ENSG00000146463	ZMYM4	1177.3	0.825175	0.00250824	0.17735
ENSG00000157110	RBPMS	125.212	1.27919	0.00251412	0.17735
ENSG00000105497	ZNF175	112.528	1.96623	0.00254106	0.178471
ENSG00000085382	HACE1	196.471	1.04206	0.00258511	0.179417
ENSG00000234912	SNHG20	33.9086	-1.45116	0.00258517	0.179417
ENSG00000126070	AGO3	377.309	0.959168	0.00260717	0.179417
ENSG00000183287	CCBE1	83.6782	-1.5502	0.00260857	0.179417
ENSG00000282988	AL031777.3	27.6514	-1.8152	0.0026188	0.179417
ENSG00000183098	GPC6	276.684	0.954774	0.00262117	0.179417
ENSG00000158769	F11R	72.0997	1.43858	0.00264243	0.180109
ENSG00000099337	KCNK6	315.839	1.7236	0.00266412	0.180684
ENSG00000244038	DDOST	4286.56	0.860241	0.00267684	0.180684
ENSG00000099812	MISP	18.7704	-1.99729	0.00268901	0.180684
ENSG00000231312	MAP4K3-DT	46.0511	1.61193	0.00269561	0.180684
ENSG00000149177	PTPRJ	1410.95	1.0148	0.00270987	0.18089
ENSG00000148719	DNAJB12	995.495	-0.838772	0.00272658	0.181256
ENSG00000204138	PHACTR4	494.189	0.856902	0.0028305	0.186532
ENSG00000198846	TOX	82.5693	1.9178	0.00283308	0.186532
ENSG00000120798	NR2C1	176.614	0.928684	0.00285036	0.186532
ENSG00000109475	RPL34	2748.54	-0.827997	0.00285228	0.186532
ENSG00000189068	VSTM1	8.52212	-3.22784	0.00286559	0.186532
ENSG00000174370	C11orf45	60.3481	-1.33114	0.00287523	0.186532
ENSG00000176697	BDNF	195.638	-1.25038	0.00291395	0.188287
ENSG00000134684	YARS	2756.23	1.12072	0.00297394	0.191399
ENSG00000139318	DUSP6	3987.55	0.897273	0.00300542	0.192216
ENSG00000116791	CRYZ	205.6	0.955256	0.00301044	0.192216
ENSG00000157184	CPT2	367.623	0.85711	0.00302391	0.192316
ENSG00000150477	KIAA1328	111.727	1.04806	0.00305994	0.193844
ENSG00000170961	HAS2	20.3147	2.08674	0.00307529	0.194055
ENSG00000164687	FABP5	273.881	-1.01744	0.00311154	0.195579
ENSG00000120885	CLU	257.641	-1.41842	0.00314986	0.197221
ENSG00000085788	DDHD2	594.334	0.817458	0.00321775	0.200693
ENSG00000168273	SMIM4	138.918	-0.99837	0.0032412	0.201015
ENSG00000112679	DUSP22	268.831	0.889577	0.00324779	0.201015
ENSG00000189266	PNRC2	710.529	0.742705	0.00326127	0.201078
ENSG00000128965	CHAC1	256.927	1.15007	0.00330983	0.203297
ENSG00000198169	ZNF251	198.968	0.937772	0.00333379	0.203993
ENSG00000157227	MMP14	4330.8	1.08599	0.00335557	0.20455
ENSG00000132849	PATJ	142.304	0.944996	0.00340873	0.206306
ENSG00000272325	NUDT3	473.022	1.04872	0.00342599	0.206306
ENSG00000186300	ZNF555	74.5982	1.13887	0.00342667	0.206306
ENSG00000160097	FNDC5	39.1912	1.7901	0.00343545	0.206306
ENSG00000188818	ZDHHC11	26.8456	-2.03848	0.00345075	0.206457
ENSG00000188916	INSYN2A	27.2209	-1.62397	0.00346804	0.206726
ENSG00000254343	AC091563.1	7.05554	5.73789	0.00349316	0.207458
ENSG00000253485	PCDHGA5	2.69125	-5.54187	0.00353349
ENSG00000108984	MAP2K6	112.452	1.98292	0.00353421	0.20894
ENSG00000225968	ELFN1	56.9062	-1.41908	0.00354398	0.20894
ENSG00000172380	GNG12	3086.94	0.692859	0.00357579	0.210049
ENSG00000167178	ISLR2	12.1786	-2.57293	0.00360553	0.211028
ENSG00000221978	CCNL2	1704.12	0.896966	0.00366354	0.213649
ENSG00000140465	CYP1A1	42.6877	-1.4924	0.00376149	0.218452
ENSG00000214022	REPIN1	880.824	-0.752755	0.00377294	0.218452
ENSG00000149212	SESN3	167.223	1.9626	0.00381206	0.219756
ENSG00000186350	RXRA	356.238	-0.891411	0.00382267	0.219756
ENSG00000176692	FOXC2	165.747	-1.08064	0.00386653	0.221407
ENSG00000106714	CNTNAP3	98.5803	1.39739	0.0038788	0.221407
ENSG00000135596	MICAL1	995.042	1.0218	0.00394454	0.221912
ENSG00000162409	PRKAA2	351.405	1.01235	0.00395544	0.221912
ENSG00000162493	PDPN	258.933	1.62558	0.00396536	0.221912
ENSG00000136205	TNS3	5232.95	0.947097	0.00396596	0.221912
ENSG00000054356	PTPRN	473.781	-1.42889	0.00397132	0.221912
ENSG00000130208	APOC1	53.2089	-1.47604	0.00398178	0.221912
ENSG00000178105	DDX10	872.304	0.905215	0.00398381	0.221912
ENSG00000103042	SLC38A7	564.766	-0.863512	0.00400315	0.222223
ENSG00000105928	GSDME	1013.86	0.762364	0.00402029	0.22241
ENSG00000171824	EXOSC10	1900.51	0.793867	0.00406663	0.224206
ENSG00000059915	PSD	32.3171	-1.59981	0.00409173	0.224822
ENSG00000282057	AC092807.3	27.3349	-1.6565	0.00410827	0.224966
ENSG00000180263	FGD6	295.179	1.29545	0.00414793	0.22583
ENSG00000149591	TAGLN	72.9977	-1.76644	0.00415556	0.22583
ENSG00000054523	KIF1B	1110.41	0.757516	0.00416599	0.22583
ENSG00000116701	NCF2	99.861	2.14739	0.00418312	0.226
ENSG00000132549	VPS13B	798.731	0.811264	0.00423341	0.226017
ENSG00000102390	PBDC1	115.272	-0.978518	0.00423498	0.226017
ENSG00000163584	RPL22L1	349.26	-1.03442	0.00423517	0.226017
ENSG00000085832	EPS15	975.884	0.723563	0.00424829	0.226017
ENSG00000113504	SLC12A7	53.8343	-1.82197	0.00426773	0.226017
ENSG00000101782	RIOK3	1036.58	0.884814	0.00427917	0.226017
ENSG00000116478	HDAC1	1751.51	0.767714	0.00430073	0.226017
ENSG00000122863	CHST3	496.928	-0.813612	0.00430642	0.226017
ENSG00000114019	AMOTL2	1667.09	-1.06117	0.00430936	0.226017
ENSG00000122862	SRGN	236.226	-1.38228	0.0043464	0.226057
ENSG00000138642	HERC6	141.223	-1.08454	0.00434674	0.226057
ENSG00000139211	AMIGO2	1167.85	-1.08748	0.0043643	0.226057
ENSG00000047056	WDR37	415.405	-0.801326	0.0043661	0.226057
ENSG00000170323	FABP4	106.73	-3.83379	0.0043951	0.226832
ENSG00000160051	IQCC	82.8885	1.23183	0.00447105	0.230017
ENSG00000155254	MARVELD1	1273.85	-0.732256	0.00454099	0.232874
ENSG00000151014	NOCT	179.095	-1.06036	0.0045971	0.235005
ENSG00000143603	KCNN3	35.4872	2.21644	0.00461639	0.235247
ENSG00000148842	CNNM2	320.184	-0.875775	0.0046943	0.236688
ENSG00000168874	ATOH8	11.1417	-2.26989	0.00472295	0.236688
ENSG00000140463	BBS4	439.388	0.799319	0.00472629	0.236688
ENSG00000164713	BRI3	119.739	-0.970813	0.00474747	0.236688
ENSG00000159753	CARMIL2	198.638	-1.47919	0.00475119	0.236688
ENSG00000119686	FLVCR2	45.199	-1.25867	0.00475721	0.236688
ENSG00000178695	KCTD12	659.006	0.852116	0.00476422	0.236688
ENSG00000066056	TIE1	3089.55	1.15592	0.00476899	0.236688
ENSG00000082212	ME2	681.273	0.771991	0.00477655	0.236688
ENSG00000140931	CMTM3	856.467	-0.679743	0.00487992	0.240391
ENSG00000153721	CNKSR3	185.78	0.963234	0.0048832	0.240391
ENSG00000162636	FAM102B	448.364	0.785316	0.00489592	0.240391
ENSG00000092847	AGO1	993.808	0.81692	0.00491697	0.24041
ENSG00000188785	ZNF548	54.6611	1.30797	0.00492607	0.24041
ENSG00000117308	GALE	1436.05	0.9096	0.00497841	0.241338
ENSG00000071054	MAP4K4	5380.29	0.810565	0.00500091	0.241338
ENSG00000248309	MEF2C-AS1	12.5398	2.49745	0.00500433	0.241338
ENSG00000218510	LINC00339	90.7234	1.35214	0.00502549	0.241338
ENSG00000114391	RPL24	4588.72	-0.84025	0.00503679	0.241338
ENSG00000042493	CAPG	2538.05	0.758499	0.00504048	0.241338
ENSG00000164142	FAM160A1	228.651	0.87809	0.00504967	0.241338
ENSG00000071205	ARHGAP10	438.703	-0.713228	0.00509224	0.242655
ENSG00000283199	C13orf46	51.9902	-1.24122	0.00511624	0.243081
ENSG00000149257	SERPINH1	1446.64	-0.771545	0.00514669	0.243811
ENSG00000004455	AK2	1621.7	0.734055	0.00516411	0.243921
ENSG00000140280	LYSMD2	176.965	-0.795925	0.00518044	0.243979
ENSG00000140199	SLC12A6	662.79	0.841737	0.00523474	0.24564
ENSG00000157150	TIMP4	17.8195	-2.60879	0.00524612	0.24564
ENSG00000126550	HTN1	2.56876	-5.4878	0.00527031
ENSG00000248890	HHIP-AS1	24.4991	-1.57065	0.00528139	0.246018
ENSG00000164742	ADCY1	771.203	0.829842	0.00528465	0.246018
ENSG00000170608	FOXA3	16.8569	-2.01969	0.00530268	0.246148
ENSG00000116729	WLS	2544.82	0.659831	0.00532267	0.246278
ENSG00000182670	TTC3	1626.35	0.874992	0.00533596	0.246278
ENSG00000156787	TBC1D31	231.781	0.836917	0.00544259	0.250483
ENSG00000128872	TMOD2	334.839	0.889185	0.00549239	0.252057
ENSG00000145198	VWA5B2	16.033	-2.0601	0.0055341	0.25224
ENSG00000099365	STX1B	16.4779	-1.92627	0.00556813	0.25224
ENSG00000147041	SYTL5	64.0841	-1.23998	0.00560647	0.25224
ENSG00000070831	CDC42	2572.48	0.941648	0.00563407	0.25224
ENSG00000133103	COG6	181.587	0.937465	0.00563643	0.25224
ENSG00000116641	DOCK7	476.212	0.898249	0.00564097	0.25224
ENSG00000172197	MBOAT1	147.103	0.964261	0.00564265	0.25224
ENSG00000164300	SERINC5	240.607	0.987589	0.00565476	0.25224
ENSG00000133835	HSD17B4	541.181	0.895739	0.00566411	0.25224
ENSG00000166394	CYB5R2	153.126	-0.911129	0.00571534	0.25224
ENSG00000187522	HSPA14	357.285	-0.825005	0.00572904	0.25224
ENSG00000244005	NFS1	370.537	0.873198	0.00573151	0.25224
ENSG00000162601	MYSM1	758.096	0.791156	0.00574676	0.25224
ENSG00000140563	MCTP2	70.3832	1.17266	0.00574932	0.25224
ENSG00000103485	QPRT	21.6481	-2.11812	0.00575277	0.25224
ENSG00000180884	ZNF792	323.436	1.21525	0.00575565	0.25224
ENSG00000148840	PPRC1	1710.59	-0.806695	0.00576182	0.25224
ENSG00000148154	UGCG	651.016	-0.715492	0.00579874	0.25317
ENSG00000171346	KRT15	111.349	1.66221	0.00582085	0.253181
ENSG00000126790	L3HYPDH	191.83	-0.840336	0.00584491	0.253181
ENSG00000158023	WDR66	20.9289	-1.8568	0.00584602	0.253181
ENSG00000155158	TTC39B	131.407	0.93429	0.00586287	0.253232
ENSG00000049130	KITLG	149.407	-0.885195	0.00590323	0.253698
ENSG00000259932	AC051619.7	46.1641	-1.45057	0.00590634	0.253698
ENSG00000142920	AZIN2	42.5457	1.41505	0.00592089	0.253698
ENSG00000116991	SIPA1L2	610.609	1.31161	0.00593648	0.253698
ENSG00000108001	EBF3	126.189	-0.84565	0.00596287	0.254123
ENSG00000096696	DSP	695.654	0.89281	0.00598499	0.254123
ENSG00000168615	ADAM9	1666.67	0.937561	0.00599596	0.254123
ENSG00000196363	WDR5	697.442	-0.802381	0.00601303	0.254123
ENSG00000166900	STX3	647.42	-0.784319	0.00602507	0.254123
ENSG00000138675	FGF5	512.77	-1.08484	0.00607373	0.255508
ENSG00000044090	CUL7	1162.77	0.954973	0.0061408	0.257659
ENSG00000175087	PDIK1L	73.1429	1.15243	0.00618568	0.258869
ENSG00000147526	TACC1	2841.1	0.756783	0.00621106	0.258915
ENSG00000163131	CTSS	64.8551	-1.32522	0.00622916	0.258915
ENSG00000179163	FUCA1	159.7	1.00704	0.00625433	0.258915
ENSG00000180616	SSTR2	27.1189	-1.58709	0.00626795	0.258915
ENSG00000126062	TMEM115	434.243	-0.969061	0.00627792	0.258915
ENSG00000147852	VLDLR	653.607	1.24177	0.00628855	0.258915
ENSG00000079739	PGM1	679.083	1.0372	0.00629897	0.258915
ENSG00000066557	LRRC40	259.57	0.849445	0.00632572	0.25892
ENSG00000134215	VAV3	112.473	2.05248	0.00634691	0.25892
ENSG00000134996	OSTF1	333.602	0.923688	0.00634717	0.25892
ENSG00000104936	DMPK	126.112	-0.853094	0.00636921	0.259164
ENSG00000135164	DMTF1	461.701	0.745653	0.00639801	0.259682
ENSG00000033867	SLC4A7	1528.73	1.16218	0.00642702	0.260053
ENSG00000138685	FGF2	278.545	-0.954097	0.00643934	0.260053
ENSG00000067992	PDK3	250.97	0.985862	0.00646489	0.260433
ENSG00000116754	SRSF11	972.607	0.699832	0.0064907	0.260823
ENSG00000152749	GPR180	281.107	0.855508	0.0065278	0.260897
ENSG00000232233	LINC02043	11.961	-2.02066	0.00654078	0.260897
ENSG00000186469	GNG2	336.232	1.19372	0.00654399	0.260897
ENSG00000169641	LUZP1	1815.2	0.749442	0.00656738	0.260897
ENSG00000019186	CYP24A1	8.87733	-3.06805	0.00658498	0.260897
ENSG00000186951	PPARA	189.35	0.824028	0.00658944	0.260897
ENSG00000253729	PRKDC	12448.2	0.762777	0.00663461	0.261825
ENSG00000138271	GPR87	10.3259	-2.72676	0.0066453	0.261825
ENSG00000124766	SOX4	1852.45	1.00205	0.00666627	0.262012
ENSG00000096092	TMEM14A	360.257	-0.756939	0.00672643	0.263735
ENSG00000104517	UBR5	2909.27	0.743673	0.00680162	0.265968
ENSG00000200959	SNORA74A	247.228	-1.25127	0.00683186	0.265968
ENSG00000165804	ZNF219	146.023	-0.804909	0.00683278	0.265968
ENSG00000138944	SHISAL1	176.872	-0.903458	0.00685529	0.266203
ENSG00000125355	TMEM255A	16.4565	-2.34794	0.00689387	0.266427
ENSG00000186918	ZNF395	417.815	0.84202	0.00690413	0.266427
ENSG00000168214	RBPJ	1055.99	0.710938	0.00691053	0.266427
ENSG00000255737	AGAP2-AS1	266.039	-0.965553	0.00694331	0.267053
ENSG00000158623	COPG2	522.388	0.866139	0.00698892	0.267085
ENSG00000005700	IBTK	458.521	0.730354	0.0070264	0.267085
ENSG00000262003	AC087392.1	35.3295	-1.46827	0.00703156	0.267085
ENSG00000135338	LCA5	42.9825	1.41698	0.00704468	0.267085
ENSG00000203995	ZYG11A	308.79	1.0319	0.00704597	0.267085
ENSG00000154529	CNTNAP3B	68.7809	1.44054	0.0070509	0.267085
ENSG00000112541	PDE10A	355.639	1.02701	0.00708454	0.267085
ENSG00000132613	MTSS2	404.252	-0.68356	0.00709276	0.267085
ENSG00000125798	FOXA2	563.997	0.888352	0.00709294	0.267085
ENSG00000083454	P2RX5	169.067	-0.860495	0.00721324	0.270983
ENSG00000112685	EXOC2	1445.11	0.690858	0.00723338	0.271109
ENSG00000180098	TRNAU1AP	168.866	0.99019	0.00725737	0.271379
ENSG00000124615	MOCS1	389.707	0.762711	0.00729931	0.272316
ENSG00000115008	IL1A	79.343	1.55276	0.00734076	0.273232
ENSG00000109390	NDUFC1	124.59	-1.01526	0.0073675	0.273239
ENSG00000142945	KIF2C	2365.4	0.711919	0.00737479	0.273239
ENSG00000150551	LYPD1	202.726	-1.60683	0.00743268	0.273436
ENSG00000205268	PDE7A	218.932	0.874913	0.00743648	0.273436
ENSG00000103249	CLCN7	1163.96	-0.846225	0.00744453	0.273436
ENSG00000159788	RGS12	595.577	0.807145	0.00744781	0.273436
ENSG00000102287	GABRE	127.559	1.25341	0.0074778	0.273915
ENSG00000148296	SURF6	372.569	-0.684152	0.00755721	0.276197
ENSG00000070785	EIF2B3	438.141	0.888689	0.00763132	0.278276
ENSG00000016391	CHDH	171.327	-0.881123	0.00774627	0.28038
ENSG00000134686	PHC2	2093.72	0.673052	0.00774693	0.28038
ENSG00000108684	ASIC2	5.36464	5.34611	0.00775877	0.28038
ENSG00000104953	TLE6	40.8344	1.3987	0.00776047	0.28038
ENSG00000109066	TMEM104	395.587	-0.935918	0.00777581	0.28038
ENSG00000116663	FBXO6	25.8637	1.65055	0.00782526	0.281535
ENSG00000137142	IGFBPL1	52.5949	-1.49481	0.00786261	0.281896
ENSG00000085719	CPNE3	860.518	0.819702	0.00787762	0.281896
ENSG00000110031	LPXN	466.954	1.64951	0.00789207	0.281896
ENSG00000184619	KRBA2	31.4222	1.57908	0.00790509	0.281896
ENSG00000141994	DUS3L	344.593	-0.89807	0.00793622	0.282383
ENSG00000168672	LRATD2	158.709	1.73829	0.00812781	0.288564
ENSG00000125703	ATG4C	157.95	0.876744	0.00820774	0.290566
ENSG00000104774	MAN2B1	398.416	0.896507	0.0082467	0.290566
ENSG00000162734	PEA15	1453.42	-0.856602	0.00826211	0.290566
ENSG00000198960	ARMCX6	152.702	-0.88055	0.00828082	0.290566
ENSG00000183023	SLC8A1	174.476	-0.836041	0.00828815	0.290566
ENSG00000205562	AL049775.1	8.28671	-2.31957	0.00829211	0.290566
ENSG00000031081	ARHGAP31	288.709	1.14726	0.00832678	0.290737
ENSG00000167114	SLC27A4	761.269	-0.665955	0.00834978	0.290737
ENSG00000196284	SUPT3H	165.51	0.92144	0.00835099	0.290737
ENSG00000102580	DNAJC3	1174.38	0.694132	0.00837723	0.291023
ENSG00000131069	ACSS2	669.523	1.07475	0.00842578	0.291825
ENSG00000129493	HEATR5A	127.584	0.947903	0.00847187	0.291825
ENSG00000143028	SYPL2	99.1999	-0.904976	0.00847474	0.291825
ENSG00000267279	AC090409.1	32.7617	-1.3899	0.00847597	0.291825
ENSG00000287281	AC012101.2	3.58219	-4.27649	0.00851165
ENSG00000072778	ACADVL	5746.4	0.752397	0.00851657	0.291825
ENSG00000143367	TUFT1	227.188	-1.00043	0.00852552	0.291825
ENSG00000138172	CALHM2	198.891	-0.921167	0.00854106	0.291825
ENSG00000188322	SBK1	44.904	1.25466	0.0085631	0.291825
ENSG00000127423	AUNIP	160.466	0.874054	0.00857484	0.291825
ENSG00000229656	ITGB1-DT	31.8753	-1.57868	0.00858096	0.291825
ENSG00000079308	TNS1	530.821	-0.687	0.00864317	0.293323
ENSG00000090273	NUDC	2100.26	0.932808	0.00867533	0.293431
ENSG00000162396	PARS2	200.934	0.791755	0.00868269	0.293431
ENSG00000110721	CHKA	339.857	-0.889304	0.00874124	0.294793
ENSG00000073060	SCARB1	583.251	-0.831526	0.00880058	0.296176
ENSG00000095397	WHRN	53.1678	-1.20515	0.00888757	0.298482
ENSG00000092607	TBX15	6528.43	0.702314	0.00896148	0.300127
ENSG00000163945	UVSSA	264.622	0.723798	0.00897373	0.300127
ENSG00000113638	TTC33	151.152	0.861723	0.00903088	0.30094
ENSG00000104765	BNIP3L	553.754	0.789526	0.00904549	0.30094
ENSG00000148331	ASB6	388.747	-0.738247	0.00905392	0.30094
ENSG00000088356	PDRG1	570.856	-0.733775	0.0090846	0.30134
ENSG00000162368	CMPK1	857.399	0.847677	0.00916655	0.303435
ENSG00000188177	ZC3H6	30.792	1.74699	0.00919439	0.303735
ENSG00000206585	RNVU1-7	36.3346	-1.6721	0.00924007	0.304621
ENSG00000122877	EGR2	11.1244	-2.2011	0.00928813	0.305581
ENSG00000127824	TUBA4A	618.62	-0.94556	0.00933596	0.306531
ENSG00000172336	POP7	337.884	-0.766633	0.00949034	0.310968
ENSG00000105856	HBP1	262.815	0.753334	0.00952652	0.311521
ENSG00000155256	ZFYVE27	398.68	-0.710614	0.00955428	0.311798
ENSG00000185000	DGAT1	289.648	0.724282	0.00958772	0.312258
ENSG00000171357	LURAP1	29.4889	1.4651	0.00963041	0.313017
ENSG00000178977	LINC00324	65.6047	-1.05896	0.00968236	0.314074
ENSG00000228793	AL033523.1	9.70492	-2.15063	0.00975245	0.314527
ENSG00000185104	FAF1	1627.43	0.618732	0.00975268	0.314527
ENSG00000185619	PCGF3	589.011	0.729954	0.00976654	0.314527
ENSG00000198113	TOR4A	614.627	-0.758933	0.00977421	0.314527
ENSG00000157796	WDR19	109.903	1.07607	0.00980878	0.315012
ENSG00000119699	TGFB3	26.5861	-1.40953	0.0098518	0.315766
ENSG00000116731	PRDM2	849.364	0.762156	0.00990713	0.31691
ENSG00000133401	PDZD2	281.741	1.15677	0.00993256	0.317096
ENSG00000153253	SCN3A	19.7194	-1.90756	0.0100236	0.319371
ENSG00000137710	RDX	1475.69	0.744884	0.0100627	0.319677
ENSG00000183431	SF3A3	3256.87	0.663526	0.0100728	0.319677
ENSG00000013297	CLDN11	1028.31	-1.04985	0.0100981	0.319853
ENSG00000146350	TBC1D32	86.4721	1.1415	0.0101561	0.32106
ENSG00000160058	BSDC1	500.25	0.869296	0.0101806	0.321204
ENSG00000260103	AC012435.1	6.46322	-2.54031	0.0102467	0.322138
ENSG00000175697	GPR156	12.5568	-2.07727	0.0102516	0.322138
ENSG00000136014	USP44	17.1086	2.07473	0.0102787	0.322138
ENSG00000110881	ASIC1	268.488	0.958323	0.0102899	0.322138
ENSG00000241985	WWTR1-IT1	4.01735	4.87162	0.0103014
ENSG00000028137	TNFRSF1B	5.27635	5.31112	0.0103247	0.322601
ENSG00000162241	SLC25A45	76.231	-1.02548	0.0103572	0.322994
ENSG00000089723	OTUB2	1079.6	0.694033	0.0104258	0.324506
ENSG00000166275	BORCS7	44.968	-1.24188	0.0105208	0.326252
ENSG00000112769	LAMA4	10.3128	-2.28014	0.0105276	0.326252
ENSG00000214491	SEC14L6	17.0135	2.10323	0.0105425	0.326252
ENSG00000152256	PDK1	316.636	0.903115	0.0106209	0.326593
ENSG00000105329	TGFB1	514.781	-1.08185	0.0106231	0.326593
ENSG00000117461	PIK3R3	123.445	1.00383	0.0106335	0.326593
ENSG00000156140	ADAMTS3	337.141	-0.755138	0.0106344	0.326593
ENSG00000207233	SNORA37	272.955	-1.10099	0.0106964	0.327874
ENSG00000128714	HOXD13	101.301	-0.915213	0.0107824	0.329446
ENSG00000198001	IRAK4	115.464	0.88846	0.0107885	0.329446
ENSG00000260944	FOXC2-AS1	56.092	-1.51435	0.010847	0.330006
ENSG00000263235	AC006111.2	19.088	-1.52357	0.0108477	0.330006
ENSG00000232956	SNHG15	407.324	-0.78005	0.0109213	0.331621
ENSG00000167920	TMEM99	74.8126	-1.08764	0.0109635	0.332279
ENSG00000112319	EYA4	339.792	0.913239	0.011012	0.33283
ENSG00000125505	MBOAT7	1200.8	-0.688658	0.0110334	0.33283
ENSG00000086991	NOX4	51.2972	-1.40148	0.0110466	0.33283
ENSG00000135480	KRT7	56.3526	-1.25312	0.0110685	0.33283
ENSG00000130684	ZNF337	212.807	0.767234	0.0111099	0.33283
ENSG00000155816	FMN2	51.5169	-1.60222	0.0111581	0.33283
ENSG00000148426	PROSER2	115.044	-0.964351	0.0111803	0.33283
ENSG00000154319	FAM167A	55.7898	-1.18032	0.011202	0.33283
ENSG00000197568	HHLA3	24.093	1.55983	0.0112149	0.33283
ENSG00000101457	DNTTIP1	917.931	0.642693	0.0112175	0.33283
ENSG00000078618	NRDC	2505.95	0.62301	0.0112215	0.33283
ENSG00000054118	THRAP3	3119.66	0.5981	0.0112289	0.33283
ENSG00000160404	TOR2A	94.2774	-0.949983	0.0112647	0.333278
ENSG00000272482	AC254633.1	14.8547	1.98181	0.0113099	0.333566
ENSG00000120327	PCDHB14	10.6515	-2.14862	0.0113157	0.333566
ENSG00000145945	FAM50B	134.291	-1.06587	0.0113873	0.335064
ENSG00000069424	KCNAB2	105.251	1.10644	0.0114308	0.335211
ENSG00000152661	GJA1	2346.42	0.944756	0.0114338	0.335211
ENSG00000162402	USP24	2066.16	0.673113	0.0115792	0.33886
ENSG00000134697	GNL2	978.374	0.771157	0.0116224	0.339508
ENSG00000131236	CAP1	6638.47	0.808396	0.0116886	0.340404
ENSG00000128606	LRRC17	54.1907	-0.997725	0.0116952	0.340404
ENSG00000103544	VPS35L	7.28603	-2.36098	0.0117196	0.340501
ENSG00000161671	EMC10	240.41	-0.867173	0.0117769	0.341151
ENSG00000197238	HIST1H4J	824.048	-1.29983	0.0118151	0.341151
ENSG00000198961	PJA2	1326.58	0.640914	0.0118191	0.341151
ENSG00000160712	IL6R	196.965	0.925584	0.0118265	0.341151
ENSG00000122417	ODF2L	272.327	0.79009	0.0118643	0.341632
ENSG00000130066	SAT1	861.628	1.07219	0.0120013	0.344952
ENSG00000136942	RPL35	2712.36	-1.05314	0.012044	0.344952
ENSG00000243742	RPLP0P2	75.8987	-1.36844	0.0120576	0.344952
ENSG00000163359	COL6A3	7553.56	0.837912	0.012065	0.344952
ENSG00000101752	MIB1	1864.5	0.688622	0.0121107	0.345648
ENSG00000107263	RAPGEF1	972.649	-0.851131	0.0121573	0.346045
ENSG00000142856	ITGB3BP	197.582	0.871711	0.012172	0.346045
ENSG00000197594	ENPP1	647.27	1.28952	0.0121889	0.346045
ENSG00000186020	ZNF529	2.53622	-4.68481	0.0122354
ENSG00000075213	SEMA3A	459.416	0.953456	0.0122631	0.34754
ENSG00000107816	LZTS2	574.55	-0.75293	0.0123794	0.348473
ENSG00000142733	MAP3K6	343.584	1.02239	0.0123835	0.348473
ENSG00000079215	SLC1A3	79.0822	-1.1861	0.0123936	0.348473
ENSG00000170989	S1PR1	19.0622	-1.97984	0.0124016	0.348473
ENSG00000143473	KCNH1	13.6879	-1.89453	0.0124039	0.348473
ENSG00000066855	MTFR1	623.178	0.718088	0.0124572	0.349022
ENSG00000130303	BST2	19.3024	3.13275	0.0124666	0.349022
ENSG00000177098	SCN4B	47.8007	-1.3924	0.0125328	0.349808
ENSG00000157077	ZFYVE9	660.722	0.83765	0.012538	0.349808
ENSG00000124785	NRN1	271.71	0.781604	0.0125806	0.350391
ENSG00000242125	SNHG3	736.462	0.735655	0.0126644	0.351699
ENSG00000284976	BX255925.3	128.331	-0.802889	0.0126711	0.351699
ENSG00000165684	SNAPC4	474.014	-0.638646	0.0127174	0.352194
ENSG00000179673	RPRML	7.53545	-2.56379	0.0127325	0.352194
ENSG00000150403	TMCO3	557.368	0.850358	0.0128213	0.353676
ENSG00000172260	NEGR1	58.7883	-1.14914	0.0128965	0.353676
ENSG00000162244	RPL29	5291.48	-0.80065	0.0128965	0.353676
ENSG00000009780	FAM76A	132.393	0.96425	0.012943	0.353676
ENSG00000128011	LRFN1	45.4263	-1.14059	0.0129438	0.353676
ENSG00000253276	CCDC71L	157.29	-1.06721	0.0129609	0.353676
ENSG00000205861	PCOTH	12.5748	-2.05493	0.0129687	0.353676
ENSG00000185818	NAT8L	233.307	-0.98574	0.0129797	0.353676
ENSG00000111802	TDP2	233.682	0.767054	0.0129831	0.353676
ENSG00000141034	GID4	299.186	0.73233	0.0131159	0.35669
ENSG00000070540	WIPI1	140.197	0.988001	0.0131414	0.356785
ENSG00000198797	BRINP2	44.954	1.66705	0.0131812	0.357179
ENSG00000182899	RPL35A	5735.67	-0.984117	0.0132002	0.357179
ENSG00000212232	SNORD17	3874.63	-1.04044	0.0132597	0.35819
ENSG00000091592	NLRP1	325.967	0.960231	0.0133823	0.360899
ENSG00000177225	GATD1	608.805	-0.756706	0.0136509	0.367528
ENSG00000131759	RARA	285.138	-0.744068	0.0137042	0.368348
ENSG00000222041	CYTOR	260.579	-0.807185	0.0137387	0.368663
ENSG00000127463	EMC1	1447.56	0.732327	0.0137984	0.36965
ENSG00000122550	KLHL7	291.032	0.704858	0.0138776	0.371157
ENSG00000137955	RABGGTB	1290.29	0.665251	0.0139409	0.372234
ENSG00000175197	DDIT3	115.617	-0.921692	0.0140013	0.373229
ENSG00000184584	TMEM173	496.15	-1.05128	0.0140872	0.373336
ENSG00000154065	ANKRD29	130.503	1.0898	0.0140985	0.373336
ENSG00000107833	NPM3	1536.89	-0.785604	0.0141267	0.373336
ENSG00000151465	CDC123	1803.1	-0.566044	0.0141346	0.373336
ENSG00000197056	ZMYM1	367.317	0.879741	0.0141442	0.373336
ENSG00000261342	AC006538.2	31.1926	-1.30123	0.0141664	0.373336
ENSG00000172731	LRRC20	1376.94	-0.772331	0.0141703	0.373336
ENSG00000163875	MEAF6	438.553	0.765057	0.0142027	0.373336
ENSG00000167740	CYB5D2	210.314	-0.736953	0.0142133	0.373336
ENSG00000070182	SPTB	493.649	-1.29626	0.0142588	0.373728
ENSG00000260852	FBXL19-AS1	40.8479	-1.10746	0.0142745	0.373728
ENSG00000005483	KMT2E	312.028	0.736599	0.0143232	0.374396
ENSG00000165886	UBTD1	391.359	-0.679281	0.014518	0.378875
ENSG00000071575	TRIB2	740.906	0.905172	0.0145661	0.378963
ENSG00000134809	TIMM10	332.627	-0.662204	0.014575	0.378963
ENSG00000109814	UGDH	627.2	0.742125	0.0145918	0.378963
ENSG00000136010	ALDH1L2	499.844	1.28745	0.0146167	0.379002
ENSG00000196139	AKR1C3	119.894	-1.01834	0.0146455	0.379139
ENSG00000263934	SNORD3A	377399	-1.0292	0.0148148	0.382281
ENSG00000159592	GPBP1L1	1796.54	0.6211	0.014834	0.382281
ENSG00000100055	CYTH4	144.84	0.755975	0.0148605	0.382281
ENSG00000153140	CETN3	166.68	0.773728	0.0148856	0.382281
ENSG00000253540	FAM86HP	24.1274	-1.61391	0.0148976	0.382281
ENSG00000175283	DOLK	190.487	-0.90656	0.0149088	0.382281
ENSG00000152527	PLEKHH2	357.034	1.18444	0.0149602	0.382669
ENSG00000153310	FAM49B	913.559	0.659618	0.014974	0.382669
ENSG00000265354	TIMM23	1064.61	-0.785264	0.014995	0.382669
ENSG00000198380	GFPT1	1057.27	0.643093	0.0150465	0.383376
ENSG00000177105	RHOG	525.727	-0.673086	0.0151004	0.383475
ENSG00000145979	TBC1D7	96.1396	0.871831	0.0151034	0.383475
ENSG00000272142	AL359643.3	21.8293	1.91298	0.0151216	0.383475
ENSG00000139323	POC1B	242.886	0.745612	0.0151768	0.384272
ENSG00000277443	MARCKS	868.646	1.00941	0.0152393	0.384633
ENSG00000100350	FOXRED2	400.94	0.768533	0.0152665	0.384633
ENSG00000142611	PRDM16	12.0462	-1.81091	0.0153202	0.384633
ENSG00000104689	TNFRSF10A	653.627	0.674306	0.0153368	0.384633
ENSG00000076685	NT5C2	926.655	-0.677148	0.0153794	0.384633
ENSG00000140854	KATNB1	1104.84	-0.738266	0.0153809	0.384633
ENSG00000226887	ERVMER34-1	159.431	-0.94667	0.0153822	0.384633
ENSG00000167720	SRR	40.0215	1.30549	0.0153932	0.384633
ENSG00000104219	ZDHHC2	469.447	0.674541	0.0154113	0.384633
ENSG00000115594	IL1R1	52.2663	1.55229	0.0154291	0.384633
ENSG00000183726	TMEM50A	604.858	0.695548	0.0154748	0.385178
ENSG00000117640	MTFR1L	324.128	0.790934	0.0156165	0.387864
ENSG00000128564	VGF	858.775	-1.12758	0.0156308	0.387864
ENSG00000142634	EFHD2	2025.02	0.729771	0.0157209	0.389503
ENSG00000058453	CROCC	57.6021	1.08931	0.0158182	0.391312
ENSG00000067606	PRKCZ	422.624	0.814542	0.0158686	0.391799
ENSG00000127603	MACF1	6889.13	0.580635	0.0158864	0.391799
ENSG00000104419	NDRG1	754.387	0.840244	0.0159673	0.393194
ENSG00000133466	C1QTNF6	307.53	-0.782549	0.016082	0.395417
ENSG00000165115	KIF27	41.6353	1.2636	0.0161926	0.397531
ENSG00000164078	MST1R	3.44594	-3.73291	0.0161974
ENSG00000157193	LRP8	1164.13	0.796803	0.0162254	0.397732
ENSG00000234233	KCNH1-IT1	2.33722	-4.55321	0.0162994
ENSG00000232533	AC093673.1	88.9222	-0.85182	0.0163532	0.400258
ENSG00000196072	BLOC1S2	339.754	-0.687597	0.0164066	0.400957
ENSG00000117118	SDHB	1131.96	0.600868	0.0164852	0.402268
ENSG00000119917	IFIT3	576.036	-0.984744	0.0165141	0.402365
ENSG00000148297	MED22	581.545	-0.683215	0.0165987	0.403295
ENSG00000069812	HES2	28.147	1.35609	0.0166021	0.403295
ENSG00000126698	DNAJC8	1120.84	0.589228	0.0166516	0.403537
ENSG00000132819	RBM38	662.013	-0.741575	0.0166632	0.403537
ENSG00000154217	PITPNC1	241.924	1.056	0.0167118	0.403537
ENSG00000155313	USP25	478.6	0.813524	0.0167121	0.403537
ENSG00000078369	GNB1	5387.05	0.679171	0.0167402	0.403613
ENSG00000173436	MICOS10	111.699	0.872269	0.0167776	0.403913
ENSG00000169418	NPR1	3.7563	-3.46661	0.0167956
ENSG00000153944	MSI2	964.491	0.607612	0.0168861	0.40592
ENSG00000198160	MIER1	693.031	0.754572	0.0169536	0.406936
ENSG00000196557	CACNA1H	6.24628	-2.92379	0.0169842	0.407067
ENSG00000146729	NIPSNAP2	635.526	0.681554	0.01706	0.408278
ENSG00000119669	IRF2BPL	2158.84	0.697134	0.0172193	0.409802
ENSG00000264940	SNORD3C	452.892	-0.971319	0.0172367	0.409802
ENSG00000121350	PYROXD1	91.0379	1.03798	0.0172561	0.409802
ENSG00000104626	ERI1	522.228	0.681381	0.017282	0.409802
ENSG00000200394	SNORA38B	217.73	-1.25036	0.0172971	0.409802
ENSG00000128567	PODXL	283.778	-0.7153	0.0172989	0.409802
ENSG00000172428	COPS9	390.21	-0.979907	0.0173164	0.409802
ENSG00000117616	RSRP1	281.964	0.748644	0.0173266	0.409802
ENSG00000167632	TRAPPC9	312.446	0.743609	0.017384	0.410556
ENSG00000117305	HMGCL	268.654	0.847929	0.0174876	0.412401
ENSG00000287528	AL121749.2	6.72904	-2.48131	0.0175255	0.412693
ENSG00000244486	SCARF2	220.185	-0.801092	0.0175743	0.41324
ENSG00000227081	AC005912.1	57.0157	-1.51541	0.017602	0.413288
ENSG00000220785	MTMR9LP	48.6177	1.24736	0.017768	0.416526
ENSG00000008083	JARID2	356.087	0.801271	0.0177914	0.416526
ENSG00000100852	ARHGAP5	1552.32	0.805418	0.0178497	0.416896
ENSG00000239713	APOBEC3G	166.929	0.978718	0.0178589	0.416896
ENSG00000159658	EFCAB14	1014.71	0.642172	0.0179738	0.417768
ENSG00000198768	APCDD1L	22.0981	2.79207	0.0179763	0.417768
ENSG00000136628	EPRS	2753.39	0.625173	0.0179935	0.417768
ENSG00000142621	FHAD1	19.5932	2.23178	0.0179997	0.417768
ENSG00000141837	CACNA1A	9.00378	-2.13933	0.0180262	0.417785
ENSG00000010626	LRRC23	50.2729	1.15778	0.0181335	0.419289
ENSG00000184838	PRR16	37.3975	-1.47789	0.0181431	0.419289
ENSG00000133812	SBF2	883.184	0.712121	0.018221	0.420489
ENSG00000178814	OPLAH	224.635	1.23004	0.0182558	0.42069
ENSG00000137809	ITGA11	626.229	0.906269	0.0183259	0.421704
ENSG00000122507	BBS9	114.086	0.85443	0.0183937	0.422663
ENSG00000055950	MRPL43	546.777	-0.64088	0.0184295	0.422884
ENSG00000005156	LIG3	423.963	0.611332	0.0184624	0.423037
ENSG00000137177	KIF13A	856.828	0.677077	0.018519	0.423734
ENSG00000007944	MYLIP	141.494	0.772831	0.0186798	0.426809
ENSG00000107984	DKK1	402.811	-2.28993	0.0187579	0.427602
ENSG00000205133	TRIQK	199.201	0.732901	0.0188397	0.427602
ENSG00000173376	NDNF	18.9656	2.00481	0.0188522	0.427602
ENSG00000196776	CD47	651.591	-0.700228	0.0188579	0.427602
ENSG00000229659	RPL26P6	30.4257	-1.5496	0.0188715	0.427602
ENSG00000140022	STON2	343.586	-0.782247	0.0188734	0.427602
ENSG00000112787	FBRSL1	263.68	-0.769755	0.019169	0.433511
ENSG00000238835	SCARNA18	115.258	-1.19714	0.0191878	0.433511
ENSG00000164941	INTS8	677.406	0.71176	0.0192244	0.433676
ENSG00000223784	LINP1	44.2649	-1.52561	0.0192488	0.433676
ENSG00000168743	NPNT	14.5744	-1.83237	0.0193002	0.434227
ENSG00000084070	SMAP2	1423.34	1.17248	0.0193378	0.434468
ENSG00000039319	ZFYVE16	571.732	0.676113	0.0194	0.434724
ENSG00000198815	FOXJ3	1286.76	0.758818	0.019403	0.434724
ENSG00000105855	ITGB8	25.6879	1.45798	0.0194539	0.43526
ENSG00000107719	PALD1	499.906	-0.647429	0.0197775	0.441888
ENSG00000152818	UTRN	499.287	0.930692	0.0198403	0.442159
ENSG00000110492	MDK	232.841	-0.93674	0.0198443	0.442159
ENSG00000205464	ATP6AP1L	42.9362	1.09579	0.0199387	0.442393
ENSG00000275714	HIST1H3A	279.46	-0.895712	0.0199461	0.442393
ENSG00000201457	SNORA55	64.2984	-1.21983	0.0199736	0.442393
ENSG00000177189	RPS6KA3	650.848	0.68604	0.0199862	0.442393
ENSG00000132763	MMACHC	308.354	0.663793	0.0199918	0.442393
ENSG00000197603	CPLANE1	291.821	0.73106	0.0200489	0.442484
ENSG00000138623	SEMA7A	1751.93	1.1992	0.0200769	0.442484
ENSG00000252577	SCARNA20	235.215	-0.925049	0.020078	0.442484
ENSG00000105289	TJP3	31.892	1.39064	0.0201749	0.44339
ENSG00000122034	GTF3A	307.876	0.866695	0.0202489	0.44339
ENSG00000174547	MRPL11	1102.89	-0.558229	0.0202619	0.44339
ENSG00000102007	PLP2	865.417	-0.737666	0.02027	0.44339
ENSG00000126458	RRAS	244.756	1.05629	0.0202727	0.44339
ENSG00000138326	RPS24	10360	-0.976361	0.0202839	0.44339
ENSG00000144036	EXOC6B	695.911	0.616979	0.0203947	0.444731
ENSG00000175305	CCNE2	239.01	0.745514	0.0204003	0.444731
ENSG00000234498	RPL13AP20	21.4549	-1.42991	0.020475	0.445535
ENSG00000137364	TPMT	285.255	0.677466	0.0205144	0.445535
ENSG00000122420	PTGFR	5.3011	-2.68769	0.0205199	0.445535
ENSG00000179912	R3HDM2	153.735	0.835735	0.0205557	0.445714
ENSG00000188167	TMPPE	155.574	-0.801986	0.0205919	0.445899
ENSG00000273760	AC245041.1	5.21772	-3.22381	0.02064	0.446344
ENSG00000166128	RAB8B	620.111	0.626364	0.0207364	0.447732
ENSG00000179981	TSHZ1	619.742	0.75932	0.0207732	0.447732
ENSG00000197808	ZNF461	1.88296	-5.02099	0.0208074
ENSG00000054277	OPN3	64.4129	1.13021	0.020808	0.447732
ENSG00000234771	SLC25A25-AS1	35.6536	-1.15183	0.0208263	0.447732
ENSG00000075223	SEMA3C	58.1934	-1.23145	0.020873	0.447732
ENSG00000078246	TULP3	249.413	0.645618	0.0208795	0.447732
ENSG00000167130	DOLPP1	247.535	-0.859039	0.0209153	0.447732
ENSG00000138347	MYPN	2.6827	-4.01716	0.0209251
ENSG00000130204	TOMM40	1341.73	-0.68294	0.0209259	0.447732
ENSG00000198648	STK39	515.072	0.841803	0.0209759	0.448057
ENSG00000136908	DPM2	299.725	-0.788831	0.0209966	0.448057
ENSG00000116525	TRIM62	193.786	0.741382	0.0211274	0.450254
ENSG00000259357	AL590133.2	2.98045	4.48554	0.0212102
ENSG00000204677	FAM153CP	12.7485	-1.77724	0.021214	0.451502
ENSG00000159363	ATP13A2	674.304	0.718979	0.0212525	0.451728
ENSG00000177700	POLR2L	849.998	-0.712204	0.0212831	0.451783
ENSG00000231185	SPRY4-AS1	19.1509	1.49157	0.021472	0.455196
ENSG00000237945	LINC00649	82.3177	0.823503	0.0215699	0.456672
ENSG00000141449	GREB1L	219.378	0.710096	0.0216297	0.456775
ENSG00000167799	NUDT8	63.8357	-1.08042	0.021634	0.456775
ENSG00000148834	GSTO1	1217.92	-0.606282	0.0216596	0.456775
ENSG00000231721	LINC-PINT	53.2996	1.10358	0.0217501	0.457113
ENSG00000184897	H1FX	623.126	-0.766014	0.0217974	0.457113
ENSG00000197444	OGDHL	899.2	-0.959475	0.0218323	0.457113
ENSG00000127774	EMC6	356.324	-0.832524	0.0218464	0.457113
ENSG00000166619	BLCAP	864.81	-0.72048	0.0218484	0.457113
ENSG00000196739	COL27A1	761.215	-0.721241	0.0218514	0.457113
ENSG00000224635	AL391095.1	20.4455	-1.40527	0.0218874	0.457113
ENSG00000116678	LEPR	153.624	1.48007	0.021902	0.457113
ENSG00000166037	CEP57	825.279	0.582832	0.0219627	0.457382
ENSG00000171476	HOPX	7.4243	-2.18223	0.0219773	0.457382
ENSG00000241544	LINC02029	13.3795	1.93635	0.0220144	0.457382
ENSG00000106333	PCOLCE	1396.82	-1.08153	0.0220507	0.457382
ENSG00000162490	DRAXIN	99.2037	0.873438	0.0220565	0.457382
ENSG00000245522	AC026250.1	68.401	-1.02646	0.0221574	0.458448
ENSG00000156795	WDYHV1	200.563	0.689037	0.0221647	0.458448
ENSG00000025800	KPNA6	1286.02	0.630431	0.0222291	0.459193
ENSG00000134352	IL6ST	2723.12	0.769383	0.0222797	0.459651
ENSG00000079332	SAR1A	2549.06	-0.59208	0.0224456	0.461563
ENSG00000197837	HIST4H4	988.359	-0.830866	0.0224456	0.461563
ENSG00000142892	PIGK	439.481	0.635506	0.0224752	0.461563
ENSG00000102786	INTS6	585.745	0.685814	0.0224986	0.461563
ENSG00000186106	ANKRD46	130.6	0.808924	0.0225153	0.461563
ENSG00000261634	AC026992.2	3.50387	4.65423	0.0225859
ENSG00000254685	FPGT	59.3546	0.963185	0.0229964	0.470828
ENSG00000144821	MYH15	119.984	-1.16748	0.023078	0.471341
ENSG00000152784	PRDM8	662.742	0.773802	0.023084	0.471341
ENSG00000278709	NKILA	148.094	0.818164	0.0231264	0.471341
ENSG00000099785	MARCH2	123.376	0.839984	0.0231381	0.471341
ENSG00000258927	AL133467.2	2.17334	-4.40735	0.0231462
ENSG00000117614	SYF2	338.947	0.602816	0.0232517	0.471986
ENSG00000122042	UBL3	178.528	0.797242	0.023267	0.471986
ENSG00000213762	ZNF134	102.472	-0.931592	0.0232864	0.471986
ENSG00000104133	SPG11	1061.28	0.664489	0.0232902	0.471986
ENSG00000179832	MROH1	329.068	0.811355	0.0233159	0.471986
ENSG00000140941	MAP1LC3B	244.647	-0.82352	0.023494	0.474005
ENSG00000248734	AC008906.1	3.10626	4.52317	0.0235175
ENSG00000185924	RTN4RL1	14.0475	-1.54693	0.0235291	0.474005
ENSG00000221676	RNU6ATAC	291.49	-1.30854	0.0235293	0.474005
ENSG00000007541	PIGQ	190.636	-0.877054	0.023533	0.474005
ENSG00000138074	SLC5A6	1507.4	-0.663945	0.0236126	0.474774
ENSG00000133958	UNC79	9.86017	-1.80072	0.02363	0.474774
ENSG00000126067	PSMB2	1227.72	0.650382	0.0237436	0.476001
ENSG00000003436	TFPI	708.736	0.7083	0.0237522	0.476001
ENSG00000189195	BTBD8	56.0017	1.34937	0.0237794	0.476001
ENSG00000226950	DANCR	788.762	-0.710011	0.0238465	0.476752
ENSG00000205611	LINC01597	4.20374	-2.76517	0.0238741
ENSG00000136167	LCP1	85.413	-1.14047	0.0239304	0.477058
ENSG00000178467	P4HTM	111.432	-0.805862	0.0239456	0.477058
ENSG00000138448	ITGAV	2146.27	0.594363	0.0239504	0.477058
ENSG00000117682	DHDDS	538.788	0.880597	0.0240493	0.477952
ENSG00000128311	TST	235.909	-0.800888	0.0240544	0.477952
ENSG00000196756	SNHG17	1453.19	-0.60635	0.0240906	0.478083
ENSG00000055147	FAM114A2	148.09	0.808353	0.0241407	0.47849
ENSG00000156802	ATAD2	1549.2	0.582212	0.0241914	0.47874
ENSG00000187801	ZFP69B	151.249	1.09697	0.0242564	0.47874
ENSG00000283160	MIR4521	25.0108	-1.38828	0.0243086	0.47874
ENSG00000175093	SPSB4	15.1475	-1.97028	0.0243498	0.47874
ENSG00000112312	GMNN	241.859	0.681993	0.0243539	0.47874
ENSG00000114125	RNF7	388.992	-0.711631	0.0243539	0.47874
ENSG00000197380	DACT3	24.3214	-1.38193	0.0243608	0.47874
ENSG00000197128	ZNF772	4.20833	-3.09093	0.0243623
ENSG00000072682	P4HA2	424.492	0.760072	0.0244249	0.479417
ENSG00000123358	NR4A1	178.193	-0.869051	0.0245347	0.480986
ENSG00000109618	SEPSECS	195.132	0.666228	0.0246595	0.482662
ENSG00000187796	CARD9	6.57784	-2.17799	0.0247081	0.482662
ENSG00000112234	FBXL4	145.346	0.755143	0.0247394	0.482662
ENSG00000115902	SLC1A4	514.767	0.750716	0.0247801	0.482662
ENSG00000099256	PRTFDC1	400.031	-0.613122	0.0247864	0.482662
ENSG00000115145	STAM2	397.985	0.635895	0.0248315	0.482662
ENSG00000198535	C2CD4A	36.6247	2.24917	0.0248321	0.482662
ENSG00000121774	KHDRBS1	2174.5	0.527084	0.0249039	0.482662
ENSG00000112294	ALDH5A1	142.34	0.958189	0.0249743	0.482662
ENSG00000224877	NDUFAF8	163.172	-0.797785	0.0249982	0.482662
ENSG00000128590	DNAJB9	89.0528	1.10958	0.0250043	0.482662
ENSG00000139219	COL2A1	8.55204	-2.42193	0.0250173	0.482662
ENSG00000130939	UBE4B	1254.27	0.637291	0.0250381	0.482662
ENSG00000198862	LTN1	825.217	0.731572	0.0250384	0.482662
ENSG00000178935	ZNF552	40.8725	1.0968	0.0251592	0.484301
ENSG00000111450	STX2	350.753	0.604162	0.0252095	0.484301
ENSG00000224078	SNHG14	689.378	0.923031	0.0252508	0.484301
ENSG00000181873	IBA57	141.836	-0.748743	0.0253187	0.484301
ENSG00000164008	C1orf50	32.1769	1.17873	0.0253295	0.484301
ENSG00000152455	SUV39H2	411.398	-0.622198	0.0253486	0.484301
ENSG00000215908	CROCCP2	204.282	0.729615	0.0253594	0.484301
ENSG00000171940	ZNF217	2205.66	0.913453	0.0253633	0.484301
ENSG00000102898	NUTF2	1082.47	-0.589257	0.025499	0.486065
ENSG00000106123	EPHB6	216.102	-0.938365	0.0255158	0.486065
ENSG00000235385	LINC02154	2.33431	-4.48933	0.0256269
ENSG00000178726	THBD	259.67	2.57387	0.0256465	0.487405
ENSG00000160785	SLC25A44	180.42	-0.648242	0.0256466	0.487405
ENSG00000176261	ZBTB8OS	185.287	0.832788	0.0258213	0.490149
ENSG00000231948	HS1BP3-IT1	2.72884	4.35668	0.0259742
ENSG00000163485	ADORA1	177.355	-1.04594	0.0260491	0.493716
ENSG00000265763	ZNF488	190.301	-0.771728	0.0260703	0.493716
ENSG00000160867	FGFR4	282.994	-0.893578	0.0261582	0.494735
ENSG00000198598	MMP17	131.791	-0.844283	0.0261983	0.494735
ENSG00000077097	TOP2B	1850.46	0.598553	0.026216	0.494735
ENSG00000002822	MAD1L1	49.6108	-1.16664	0.0262741	0.494879
ENSG00000160716	CHRNB2	7.22336	-2.19476	0.0262849	0.494879
ENSG00000170558	CDH2	1542.08	-0.614057	0.0263801	0.496093
ENSG00000178163	ZNF518B	333.515	0.812253	0.0264837	0.497462
ENSG00000188428	BLOC1S5	74.8351	0.825629	0.0265524	0.498173
ENSG00000188554	NBR1	1469.29	0.603404	0.0266755	0.499903
ENSG00000134470	IL15RA	132.787	-0.897872	0.0267368	0.500472
ENSG00000150779	TIMM8B	240.41	-0.650872	0.026783	0.500754
ENSG00000185640	KRT79	17.4081	1.88945	0.0268141	0.500757
ENSG00000107554	DNMBP	3962.27	-0.685862	0.0268493	0.500836
ENSG00000228705	LINC00659	12.1403	2.24048	0.0269246	0.500892
ENSG00000197948	FCHSD1	93.2873	0.797025	0.026984	0.500892
ENSG00000185345	PRKN	3.74738	4.8289	0.026991
ENSG00000174721	FGFBP3	15.8606	-1.68558	0.0269947	0.500892
ENSG00000196460	RFX8	78.8206	1.16368	0.0270301	0.500892
ENSG00000054116	TRAPPC3	456.329	0.778135	0.0270324	0.500892
ENSG00000170162	VGLL2	3.53611	-3.51659	0.0270503
ENSG00000178184	PARD6G	74.6574	0.847384	0.0270592	0.500892
ENSG00000165288	BRWD3	721.604	0.647121	0.0270694	0.500892
ENSG00000117298	ECE1	1509.58	0.716645	0.0271199	0.501253
ENSG00000158402	CDC25C	332.183	0.662024	0.0271747	0.501691
ENSG00000145425	RPS3A	5066.2	-0.710597	0.0272342	0.502217
ENSG00000172346	CSDC2	2.13268	-4.35832	0.0273087
ENSG00000146834	MEPCE	734.515	-0.730518	0.0275664	0.507763
ENSG00000237943	PRKCQ-AS1	127.385	-0.678221	0.0276406	0.507973
ENSG00000166263	STXBP4	204.496	0.803637	0.0276407	0.507973
ENSG00000212802	RPL15P3	70.5796	-1.22462	0.0278136	0.509267
ENSG00000147475	ERLIN2	599.975	0.629503	0.0278259	0.509267
ENSG00000206609	SNORD116-11	84.2615	1.17864	0.0278935	0.509267
ENSG00000133138	TBC1D8B	92.7765	0.828888	0.0278939	0.509267
ENSG00000111452	ADGRD1	4.58923	-2.83106	0.0278991	0.509267
ENSG00000181904	C5orf24	530.527	0.653108	0.0279003	0.509267
ENSG00000083544	TDRD3	116.515	1.00749	0.0280223	0.510917
ENSG00000176058	TPRN	152.418	-0.682671	0.0281578	0.512471
ENSG00000273230	AC102953.2	29.8226	-1.1514	0.0281793	0.512471
ENSG00000025039	RRAGD	157.81	0.955236	0.0282027	0.512471
ENSG00000160062	ZBTB8A	57.5921	1.0749	0.0282889	0.512738
ENSG00000121211	MND1	111.939	-0.755216	0.028323	0.512738
ENSG00000198780	FAM169A	337.882	0.688252	0.0283394	0.512738
ENSG00000226532	AL022718.1	22.3782	-1.85461	0.0283444	0.512738
ENSG00000106868	SUSD1	171.366	-0.791478	0.0284754	0.514532
ENSG00000142871	CCN1	488.385	-1.00802	0.0286351	0.515699
ENSG00000237940	LINC01238	2.65238	4.3057	0.0286458
ENSG00000235109	ZSCAN31	76.1686	1.37733	0.0286477	0.515699
ENSG00000026652	AGPAT4	226.148	0.611824	0.0286742	0.515699
ENSG00000102804	TSC22D1	1385.74	0.784484	0.0286756	0.515699
ENSG00000006125	AP2B1	2752.84	0.513235	0.0286996	0.515699
ENSG00000181418	DDN	58.8255	-1.15846	0.0287947	0.516781
ENSG00000184227	ACOT1	38.4438	-1.46087	0.028826	0.516781
ENSG00000168952	STXBP6	28.4493	-1.94316	0.0288558	0.516781
ENSG00000221818	EBF2	25.7593	4.05608	0.0289652	0.518166
ENSG00000130363	RSPH3	92.5652	0.918159	0.0290522	0.519147
ENSG00000065609	SNAP91	23.7199	1.42039	0.0291402	0.519994
ENSG00000154079	SDHAF4	37.2256	1.12677	0.0291639	0.519994
ENSG00000118707	TGIF2	634.936	-0.572077	0.0292359	0.520701
ENSG00000148288	GBGT1	21.2484	-1.51138	0.0293707	0.522013
ENSG00000160813	PPP1R35	339.846	0.670855	0.0293899	0.522013
ENSG00000144455	SUMF1	364.798	-0.732991	0.0294065	0.522013
ENSG00000153815	CMIP	648.822	-0.852243	0.0294576	0.522348
ENSG00000131697	NPHP4	313.846	0.618921	0.0295217	0.52291
ENSG00000157216	SSBP3	501.337	0.758098	0.0295976	0.523401
ENSG00000125676	THOC2	905.124	0.618103	0.0296143	0.523401
ENSG00000118454	ANKRD13C	291.744	0.662068	0.0297358	0.524715
ENSG00000135968	GCC2	367.114	0.663969	0.0297536	0.524715
ENSG00000116157	GPX7	305.674	0.663918	0.0299723	0.527995
ENSG00000086730	LAT2	146.71	-0.678277	0.0301057	0.529616
ENSG00000163710	PCOLCE2	179.699	-0.745253	0.0301784	0.529616
ENSG00000254141	AC103853.2	3.06245	4.45656	0.0301808
ENSG00000102763	VWA8	405.195	0.966242	0.0301861	0.529616
ENSG00000239559	RPL37P2	44.9193	-1.28906	0.0302405	0.529616
ENSG00000019485	PRDM11	265.127	-0.640837	0.0303046	0.529616
ENSG00000162517	PEF1	897.967	0.617721	0.0303415	0.529616
ENSG00000011295	TTC19	498.208	0.800368	0.0303883	0.529616
ENSG00000147509	RGS20	120.564	0.834845	0.0304146	0.529616
ENSG00000113369	ARRDC3	236.806	1.15605	0.0304507	0.529616
ENSG00000162496	DHRS3	1021.49	1.26974	0.0304697	0.529616
ENSG00000052749	RRP12	1481.05	-0.687893	0.0304761	0.529616
ENSG00000095587	TLL2	13.8037	-1.69609	0.0305308	0.529616
ENSG00000149654	CDH22	14.9463	-1.57534	0.0305753	0.529616
ENSG00000162426	SLC45A1	19.1452	1.82145	0.0305814	0.529616
ENSG00000153914	SREK1	899.74	0.606383	0.030586	0.529616
ENSG00000104290	FZD3	188.23	0.795918	0.0305888	0.529616
ENSG00000083097	DOP1A	123.148	0.874449	0.0307049	0.531057
ENSG00000071242	RPS6KA2	687.928	0.738951	0.0308721	0.532811
ENSG00000166135	HIF1AN	1476.68	-0.524829	0.0308723	0.532811
ENSG00000067208	EVI5	336.365	0.662615	0.0309774	0.533684
ENSG00000112249	ASCC3	874.662	0.693857	0.0309889	0.533684
ENSG00000067167	TRAM1	1374.28	0.638172	0.0311092	0.535012
ENSG00000257702	LBX2-AS1	117.36	-0.861502	0.0311485	0.535012
ENSG00000090776	EFNB1	906.383	1.27757	0.0311783	0.535012
ENSG00000170745	KCNS3	260	0.759646	0.0311985	0.535012
ENSG00000110076	NRXN2	11.9927	-1.88696	0.0313167	0.535154
ENSG00000110318	CEP126	73.9505	0.971998	0.03132	0.535154
ENSG00000130766	SESN2	219.486	0.906877	0.0313566	0.535154
ENSG00000170734	POLH	188.699	0.705715	0.0313835	0.535154
ENSG00000001461	NIPAL3	314.147	0.727664	0.0314046	0.535154
ENSG00000184990	SIVA1	820.329	-0.606133	0.0314056	0.535154
ENSG00000013392	RWDD2A	27.0741	1.23598	0.0314514	0.53537
ENSG00000116560	SFPQ	3613.35	0.608792	0.031518	0.535712
ENSG00000116906	GNPAT	480.072	0.591761	0.0315936	0.535712
ENSG00000165996	HACD1	52.8361	-0.903109	0.0315948	0.535712
ENSG00000038210	PI4K2B	281.304	0.660054	0.0316224	0.535712
ENSG00000053371	AKR7A2	437.652	0.678095	0.0316373	0.535712
ENSG00000164983	TMEM65	287.702	0.988278	0.0317157	0.535991
ENSG00000140750	ARHGAP17	573.807	-0.667959	0.0317495	0.535991
ENSG00000205758	CRYZL1	115.622	0.699216	0.0317533	0.535991
ENSG00000146833	TRIM4	273.116	0.646731	0.0317886	0.536027
ENSG00000149564	ESAM	30.508	-1.16778	0.0318311	0.536183
ENSG00000251898	SCARNA11	28.0535	-1.19189	0.0319243	0.536326
ENSG00000251011	TMEM108-AS1	2.01019	-4.28883	0.0319277
ENSG00000102595	UGGT2	363.632	0.683228	0.0319728	0.536326
ENSG00000165195	PIGA	109.934	0.725914	0.0319966	0.536326
ENSG00000198682	PAPSS2	390.377	-0.665863	0.0320201	0.536326
ENSG00000165272	AQP3	10.5078	-1.91757	0.0320421	0.536326
ENSG00000147862	NFIB	691.048	0.69456	0.0320789	0.536326
ENSG00000185624	P4HB	7946.66	0.626655	0.032085	0.536326
ENSG00000179630	LACC1	22.8311	1.42906	0.0321052	0.536326
ENSG00000079337	RAPGEF3	104.298	0.841895	0.0322504	0.537377
ENSG00000148700	ADD3	3796	0.832342	0.03228	0.537377
ENSG00000167118	URM1	773.664	-0.821927	0.0322804	0.537377
ENSG00000110651	CD81	1379.38	-0.631184	0.0323012	0.537377
ENSG00000147251	DOCK11	298.629	0.744559	0.0324152	0.538633
ENSG00000126858	RHOT1	210.779	0.675147	0.0324434	0.538633
ENSG00000164808	SPIDR	734.703	0.66852	0.0325452	0.539769
ENSG00000135049	AGTPBP1	316.166	0.825692	0.0326919	0.541646
ENSG00000144426	NBEAL1	322.821	0.677931	0.0327686	0.542361
ENSG00000074964	ARHGEF10L	139.459	0.781963	0.0328748	0.542629
ENSG00000147065	MSN	13929.4	0.692418	0.0328777	0.542629
ENSG00000198746	GPATCH3	175.721	0.877598	0.0328856	0.542629
ENSG00000120868	APAF1	846.728	0.81187	0.0329346	0.542883
ENSG00000148300	REXO4	484.173	-0.538972	0.0330083	0.543271
ENSG00000013375	PGM3	409.963	0.723121	0.0330513	0.543271
ENSG00000100219	XBP1	1401.03	0.779123	0.0330707	0.543271
ENSG00000204178	MACO1	371.451	0.710678	0.0330926	0.543271
ENSG00000100206	DMC1	48.3212	1.02081	0.0331835	0.543744
ENSG00000155034	FBXL18	1191.1	-0.580558	0.0332105	0.543744
ENSG00000068383	INPP5A	891.901	-0.723755	0.0332224	0.543744
ENSG00000285646	AL021155.2	114.406	1.17613	0.0332906	0.544308
ENSG00000162419	GMEB1	232.128	0.748662	0.0333936	0.54544
ENSG00000128591	FLNC	5069.27	-0.622175	0.0334355	0.545465
ENSG00000029993	HMGB3	2399.6	0.813995	0.0334627	0.545465
ENSG00000246273	SBF2-AS1	122.546	-0.825838	0.0335493	0.546327
ENSG00000153404	PLEKHG4B	702.298	0.932562	0.0336438	0.547314
ENSG00000183486	MX2	21.7746	-1.40452	0.0336983	0.547628
ENSG00000228672	PROB1	316.038	-0.771668	0.0337551	0.547628
ENSG00000178531	CTXN1	14.5005	-1.56691	0.0337833	0.547628
ENSG00000011007	ELOA	2342.8	0.620845	0.0337988	0.547628
ENSG00000129116	PALLD	316.588	-0.834285	0.0340507	0.551157
ENSG00000058091	CDK14	420.181	0.625106	0.0340977	0.551365
ENSG00000275734	AC010538.1	6.94328	-1.95929	0.0341902	0.552286
ENSG00000234699	AL139339.1	8.85595	-1.7664	0.034223	0.552286
ENSG00000142864	SERBP1	5808.04	0.544287	0.0343339	0.552399
ENSG00000118160	SLC8A2	15.0291	-1.66444	0.0343463	0.552399
ENSG00000176994	SMCR8	1864.26	-0.559868	0.0343577	0.552399
ENSG00000014824	SLC30A9	613.519	0.724064	0.0343668	0.552399
ENSG00000133706	LARS	2267.52	0.591165	0.0344413	0.553046
ENSG00000135862	LAMC1	4333.75	0.732304	0.0345222	0.553796
ENSG00000173557	C2orf70	22.758	-1.27931	0.0345798	0.554169
ENSG00000116667	C1orf21	458.206	0.846678	0.0346756	0.555153
ENSG00000168701	TMEM208	374.74	-0.801273	0.0347156	0.555243
ENSG00000181690	PLAG1	171.335	0.788194	0.0348151	0.555354
ENSG00000148926	ADM	855.459	-0.777817	0.0348484	0.555354
ENSG00000112584	FAM120B	481.779	0.604302	0.0348496	0.555354
ENSG00000088836	SLC4A11	227.773	-0.826021	0.03486	0.555354
ENSG00000163349	HIPK1	3124.63	0.552603	0.0349988	0.557016
ENSG00000279631	AL158211.5	5.19161	-2.36517	0.0350747	0.557675
ENSG00000214160	ALG3	647.991	-0.849408	0.0351123	0.557723
ENSG00000168702	LRP1B	21.5261	1.71376	0.03523	0.559042
ENSG00000145681	HAPLN1	2.5051	-3.92084	0.0352478
ENSG00000140279	DUOX2	9.06375	-1.69438	0.0353083	0.559208
ENSG00000187605	TET3	737.435	-0.572431	0.0353097	0.559208
ENSG00000180488	MIGA1	221.644	0.701556	0.0353544	0.559368
ENSG00000219902	RPL35P3	2.84596	4.35075	0.0354119
ENSG00000288007	AC092803.5	1.94064	-4.23528	0.0354605
ENSG00000133101	CCNA1	130.844	0.721419	0.0354729	0.560373
ENSG00000198624	CCDC69	82.2201	0.822524	0.035522	0.560373
ENSG00000203943	SAMD13	10.5324	1.96908	0.035522	0.560373
ENSG00000253230	LINC00599	4.76359	-2.75071	0.0356019	0.560882
ENSG00000184254	ALDH1A3	2119.01	2.22057	0.0356302	0.560882
ENSG00000139239	RPL14P1	56.2348	-1.03128	0.0356729	0.560882
ENSG00000163947	ARHGEF3	261.189	1.08582	0.0357207	0.560882
ENSG00000074855	ANO8	106.902	0.94988	0.035762	0.560882
ENSG00000141441	GAREM1	192.1	0.685114	0.0357626	0.560882
ENSG00000278493	AC039056.2	14.6688	1.80411	0.0358585	0.561842
ENSG00000213625	LEPROT	597.485	0.600292	0.0359186	0.562238
ENSG00000069702	TGFBR3	247.065	0.763465	0.0360912	0.564158
ENSG00000107262	BAG1	946.254	-0.512326	0.0361112	0.564158
ENSG00000162434	JAK1	1994.11	0.650413	0.0361967	0.564846
ENSG00000117016	RIMS3	276.495	0.754696	0.0362362	0.564846
ENSG00000236144	TMEM147-AS1	178.57	-0.670182	0.0362601	0.564846
ENSG00000127947	PTPN12	1055.53	0.826647	0.0363358	0.56548
ENSG00000188566	NDOR1	275.073	-0.612555	0.0363933	0.56583
ENSG00000164330	EBF1	30.8059	1.10399	0.036596	0.56819
ENSG00000178718	RPP25	1620.45	-0.620025	0.0366635	0.56819
ENSG00000151208	DLG5	1833.33	-0.569397	0.0366884	0.56819
ENSG00000113594	LIFR	404.462	0.777791	0.0367126	0.56819
ENSG00000080546	SESN1	88.7944	0.867505	0.0367346	0.56819
ENSG00000129292	PHF20L1	689.763	0.610998	0.0367778	0.56819
ENSG00000080573	COL5A3	6.31735	-2.27087	0.0368212	0.56819
ENSG00000143061	IGSF3	1705.19	0.564163	0.03683	0.56819
ENSG00000120992	LYPLA1	771.712	0.528532	0.0369019	0.56819
ENSG00000253190	AC084082.1	60.0693	-1.04132	0.0369058	0.56819
ENSG00000226900	AL451069.1	6.64861	-2.87598	0.036932	0.56819
ENSG00000137486	ARRB1	284.183	0.62497	0.037026	0.568571
ENSG00000014123	UFL1	229.3	0.622852	0.0370271	0.568571
ENSG00000235106	BRD3OS	328.771	-0.578358	0.0370744	0.568756
ENSG00000151320	AKAP6	52.8896	1.53499	0.0371542	0.569169
ENSG00000139197	PEX5	538.884	-0.541235	0.0371718	0.569169
ENSG00000187325	TAF9B	409.375	0.625734	0.0372706	0.56978
ENSG00000178445	GLDC	50.9824	-0.92476	0.0373617	0.56978
ENSG00000114107	CEP70	147.579	0.632766	0.0373713	0.56978
ENSG00000107201	DDX58	569.432	-0.516064	0.0373819	0.56978
ENSG00000176623	RMDN1	451.779	0.531775	0.0373936	0.56978
ENSG00000115363	EVA1A	737.337	0.666117	0.0374233	0.56978
ENSG00000169398	PTK2	2027.55	0.508266	0.0374624	0.569838
ENSG00000039560	RAI14	4137.92	0.639481	0.0375245	0.570181
ENSG00000227308	AC009502.1	17.6862	-1.23106	0.0375556	0.570181
ENSG00000196205	EEF1A1P5	336.194	0.936402	0.0376203	0.570436
ENSG00000175785	PRIMA1	26.6898	-1.65967	0.0376599	0.570436
ENSG00000152061	RABGAP1L	363.961	0.658327	0.0376783	0.570436
ENSG00000157895	C12orf43	291.856	-0.598467	0.0377318	0.570711
ENSG00000265735	RN7SL5P	96.6338	-1.42727	0.0378428	0.571854
ENSG00000163840	DTX3L	616.92	-0.582727	0.0380197	0.573991
ENSG00000244509	APOBEC3C	686.387	0.653458	0.0381885	0.576001
ENSG00000271361	HTATSF1P2	68.1577	0.949653	0.0382604	0.576069
ENSG00000214530	STARD10	112.369	0.950832	0.0382643	0.576069
ENSG00000113645	WWC1	673.445	-0.565111	0.0383827	0.576883
ENSG00000287445	AC092803.4	2.43787	4.15815	0.0383869
ENSG00000279821	AC145098.2	20.9151	-1.22039	0.0383898	0.576883
ENSG00000184985	SORCS2	36.6784	1.27548	0.0384847	0.577649
ENSG00000146670	CDCA5	1147.31	-0.568735	0.0385123	0.577649
ENSG00000140600	SH3GL3	46.1577	-0.998674	0.0386766	0.579575
ENSG00000070882	OSBPL3	761.521	0.656411	0.038719	0.579672
ENSG00000124217	MOCS3	379.826	-0.5606	0.0387832	0.580096
ENSG00000198053	SIRPA	364.931	-0.619545	0.0388954	0.581236
ENSG00000136888	ATP6V1G1	585.961	-0.649107	0.0390253	0.582639
ENSG00000249784	SCARNA22	291.495	0.928854	0.0390943	0.58313
ENSG00000163877	SNIP1	182.525	0.798236	0.0392766	0.584398
ENSG00000074181	NOTCH3	48.2028	-1.13811	0.0393002	0.584398
ENSG00000205871	RPS3AP47	46.5557	-1.06542	0.0393133	0.584398
ENSG00000178860	MSC	71.2876	-0.895285	0.039324	0.584398
ENSG00000047230	CTPS2	160.321	0.781436	0.0394298	0.585175
ENSG00000237523	LINC00857	88.3386	-0.907075	0.0394566	0.585175
ENSG00000171444	MCC	954.63	0.840243	0.039485	0.585175
ENSG00000103066	PLA2G15	315.58	-0.771416	0.039572	0.585298
ENSG00000077150	NFKB2	1070.78	-0.8563	0.0395915	0.585298
ENSG00000119866	BCL11A	150.999	-0.767076	0.039602	0.585298
ENSG00000113318	MSH3	530.078	0.595471	0.039682	0.585515
ENSG00000182180	MRPS16	1326.89	-0.488291	0.0396892	0.585515
ENSG00000182257	PRR34	7.53942	2.31142	0.0397887	0.586334
ENSG00000125538	IL1B	653.568	4.25387	0.0398173	0.586334
ENSG00000109680	TBC1D19	47.3944	0.954907	0.0398677	0.586542
ENSG00000113391	FAM172A	224.076	0.759589	0.0400354	0.586906
ENSG00000136152	COG3	341.08	0.661789	0.0400445	0.586906
ENSG00000232499	AL391058.1	2.56347	4.23165	0.0400679
ENSG00000285867	BX470102.2	15.3275	1.48637	0.040103	0.586906
ENSG00000188211	NCR3LG1	704.377	-0.584072	0.0401067	0.586906
ENSG00000198830	HMGN2	596.705	0.540284	0.0401084	0.586906
ENSG00000100319	ZMAT5	227.067	0.648388	0.0401105	0.586906
ENSG00000225484	NUTM2B-AS1	82.7921	-0.880935	0.0404382	0.591167
ENSG00000115904	SOS1	953.611	0.634765	0.0404979	0.591503
ENSG00000182154	MRPL41	269.463	-0.67843	0.0405626	0.591913
ENSG00000156502	SUPV3L1	560.334	-0.556573	0.0406019	0.591952
ENSG00000137628	DDX60	338.581	-0.731242	0.0407036	0.592546
ENSG00000128394	APOBEC3F	99.3615	0.850375	0.040716	0.592546
ENSG00000102882	MAPK3	360.484	0.65289	0.0407613	0.592671
ENSG00000272908	AC006033.2	2.40286	-3.73563	0.0407979
ENSG00000164120	HPGD	11.7833	2.37324	0.0408306	0.592684
ENSG00000004139	SARM1	161.743	-0.696504	0.0408718	0.592684
ENSG00000105732	ZNF574	345.324	-0.555464	0.0408723	0.592684
ENSG00000085998	POMGNT1	1360.57	0.669116	0.0410007	0.594014
ENSG00000151025	GPR158	1.56147	-4.76054	0.0410108
ENSG00000198546	ZNF511	200.615	-0.72268	0.041103	0.594263
ENSG00000179431	FJX1	403.224	-0.719991	0.0411438	0.594263
ENSG00000198910	L1CAM	96.1379	-1.31245	0.0411919	0.594263
ENSG00000104412	EMC2	238.393	0.672632	0.0411929	0.594263
ENSG00000132128	LRRC41	778.087	0.639678	0.0412019	0.594263
ENSG00000144857	BOC	140.759	0.686475	0.0414978	0.597417
ENSG00000113742	CPEB4	516.92	0.585651	0.0415015	0.597417
ENSG00000237686	AL109615.3	16.5945	1.4886	0.0415315	0.597417
ENSG00000178217	SH2D4B	1.86629	-4.16986	0.041599
ENSG00000064300	NGFR	7.00066	-2.24223	0.0417826	0.600495
ENSG00000081138	CDH7	1.97649	-4.27671	0.0417879
ENSG00000148411	NACC2	401.371	-0.816863	0.0418772	0.600796
ENSG00000140443	IGF1R	5917.33	-0.480861	0.0419218	0.600796
ENSG00000141540	TTYH2	62.5369	-0.951529	0.0419351	0.600796
ENSG00000217275	AL031777.1	9.51618	-2.05335	0.0419815	0.600796
ENSG00000188910	GJB3	2.4339	4.20555	0.0419836
ENSG00000180537	RNF182	95.6044	0.840759	0.0420282	0.600796
ENSG00000167747	C19orf48	1218.85	-0.638651	0.0420498	0.600796
ENSG00000110844	PRPF40B	242.752	0.676833	0.042099	0.600796
ENSG00000260025	CRIM1-DT	49.572	-1.12275	0.0421261	0.600796
ENSG00000064726	BTBD1	1269.08	0.549877	0.0421505	0.600796
ENSG00000177628	GBA	210.966	-0.798132	0.0422099	0.600796
ENSG00000137331	IER3	1669.53	0.84645	0.0422127	0.600796
ENSG00000287112	AC068787.3	2.64171	4.25478	0.0423878
ENSG00000139410	SDSL	125.253	-0.910662	0.042392	0.602817
ENSG00000156011	PSD3	866.736	0.593596	0.0424313	0.602845
ENSG00000109794	FAM149A	17.442	-1.67288	0.0424807	0.603017
ENSG00000236453	AC003092.1	53.4154	-1.5138	0.042561	0.603614
ENSG00000138622	HCN4	26.5841	-1.26774	0.0425975	0.603614
ENSG00000139668	WDFY2	500.554	0.579036	0.0426569	0.603926
ENSG00000070081	NUCB2	338.202	0.598108	0.0427368	0.604528
ENSG00000084623	EIF3I	3192.61	0.660655	0.0427926	0.604788
ENSG00000115226	FNDC4	67.9203	1.00946	0.0428613	0.605201
ENSG00000196503	ARL9	21.2247	-1.37669	0.0429255	0.605201
ENSG00000262202	AC007952.4	67.8552	0.982597	0.0429343	0.605201
ENSG00000188549	CCDC9B	347.962	-0.758223	0.0429787	0.605299
ENSG00000138101	DTNB	161.165	0.701692	0.0431114	0.605773
ENSG00000158006	PAFAH2	111.822	0.809956	0.0431115	0.605773
ENSG00000152348	ATG10	99.272	0.735617	0.0431249	0.605773
ENSG00000122641	INHBA	454.749	2.06132	0.0432446	0.606927
ENSG00000233622	CYP2T1P	2.36587	4.15906	0.0432715
ENSG00000065717	TLE2	183.664	0.889771	0.0434485	0.609046
ENSG00000126259	KIRREL2	30.3776	-1.48567	0.0435246	0.609046
ENSG00000279672	AP006621.5	27.4535	-1.17997	0.0435771	0.609046
ENSG00000187650	VMAC	17.8118	1.33939	0.0436101	0.609046
ENSG00000064601	CTSA	1585.23	-0.653216	0.0436206	0.609046
ENSG00000104870	FCGRT	233.02	-0.826225	0.0436218	0.609046
ENSG00000167815	PRDX2	343.925	-0.687551	0.0437901	0.610368
ENSG00000108960	MMD	154.783	0.91888	0.0438084	0.610368
ENSG00000089876	DHX32	722.181	0.509264	0.0438298	0.610368
ENSG00000245556	SCAMP1-AS1	118.476	-0.829628	0.0439736	0.611843
ENSG00000086666	ZFAND6	660.68	0.565763	0.0440757	0.61223
ENSG00000080189	SLC35C2	1517.08	-0.514315	0.0441061	0.61223
ENSG00000147364	FBXO25	163.094	0.741734	0.044134	0.61223
ENSG00000054654	SYNE2	1134.92	0.89758	0.0441939	0.61223
ENSG00000171467	ZNF318	345.632	0.694388	0.0442295	0.61223
ENSG00000115602	IL1RL1	5.09489	3.81203	0.0442759	0.61223
ENSG00000143147	GPR161	315.071	0.718117	0.0442977	0.61223
ENSG00000173175	ADCY5	8.34588	-1.84368	0.0443118	0.61223
ENSG00000198722	UNC13B	761.267	0.588685	0.044399	0.61223
ENSG00000136848	DAB2IP	1199.68	-0.628893	0.0444253	0.61223
ENSG00000240087	RPSAP12	8.1903	-1.89489	0.0444475	0.61223
ENSG00000197265	GTF2E2	335.177	0.680211	0.0444857	0.61223
ENSG00000242247	ARFGAP3	356.36	0.958759	0.0445345	0.61223
ENSG00000119640	ACYP1	90.1989	0.828305	0.0445699	0.61223
ENSG00000269918	AF131215.6	24.9776	-1.08102	0.0445699	0.61223
ENSG00000113240	CLK4	99.8005	0.717481	0.0448774	0.614834
ENSG00000143816	WNT9A	11.8155	-1.44851	0.0448954	0.614834
ENSG00000143127	ITGA10	197.37	1.34183	0.0449221	0.614834
ENSG00000101596	SMCHD1	1611.2	0.675719	0.0449684	0.614834
ENSG00000039139	DNAH5	88.6461	1.0358	0.0450446	0.614834
ENSG00000104983	CCDC61	77.9288	0.830926	0.0450586	0.614834
ENSG00000054598	FOXC1	252.244	0.590186	0.0450778	0.614834
ENSG00000187961	KLHL17	362.526	1.00482	0.0450853	0.614834
ENSG00000183010	PYCR1	1092.76	0.792166	0.0451829	0.614834
ENSG00000270882	HIST2H4A	7.56655	-1.95414	0.0451979	0.614834
ENSG00000075539	FRYL	938.777	0.69646	0.0452306	0.614834
ENSG00000128694	OSGEPL1	159.929	0.649592	0.0452525	0.614834
ENSG00000107021	TBC1D13	548.795	-0.547512	0.0452543	0.614834
ENSG00000237254	TRBV30	3.91206	-2.61761	0.0452736
ENSG00000124788	ATXN1	214.924	0.632329	0.0452982	0.614913
ENSG00000130054	FAM155B	113.453	-0.728581	0.0454002	0.615781
ENSG00000137098	SPAG8	16.4554	1.48671	0.0454811	0.615914
ENSG00000164659	KIAA1324L	277.768	0.549819	0.0454863	0.615914
ENSG00000229950	TFAP2A-AS1	2.45253	4.18721	0.0454997
ENSG00000067900	ROCK1	1029.62	0.549918	0.0456112	0.616701
ENSG00000136950	ARPC5L	556.863	-0.498933	0.0456835	0.616701
ENSG00000112655	PTK7	1977.01	0.502551	0.0456964	0.616701
ENSG00000150938	CRIM1	3933.03	-0.559192	0.0456987	0.616701
ENSG00000171552	BCL2L1	1380.21	-0.566845	0.0457465	0.616701
ENSG00000064313	TAF2	568.498	0.619064	0.0457735	0.616701
ENSG00000178075	GRAMD1C	97.4913	0.909753	0.0458554	0.616991
ENSG00000151779	NBAS	1193.57	0.483153	0.0458899	0.616991
ENSG00000075643	MOCOS	618.809	0.639512	0.0459785	0.616991
ENSG00000115165	CYTIP	4.68384	3.71872	0.046048	0.616991
ENSG00000107104	KANK1	421.333	-0.617555	0.0461207	0.616991
ENSG00000204682	MIR1915HG	18.527	-1.26154	0.0461352	0.616991
ENSG00000260920	AL031985.3	59.7357	1.19532	0.046157	0.616991
ENSG00000088451	TGDS	151.488	0.669471	0.0462555	0.616991
ENSG00000172006	ZNF554	33.9237	1.04963	0.0463009	0.616991
ENSG00000112304	ACOT13	82.3732	0.806537	0.0463538	0.616991
ENSG00000127884	ECHS1	2105.62	-0.706166	0.046371	0.616991
ENSG00000089177	KIF16B	528.741	0.520986	0.0464401	0.616991
ENSG00000166562	SEC11C	391.923	-0.535691	0.0464437	0.616991
ENSG00000260274	AC068338.2	34.0683	-1.01317	0.0464999	0.616991
ENSG00000156650	KAT6B	551.198	-0.525449	0.04653	0.616991
ENSG00000144224	UBXN4	453.864	0.653291	0.046579	0.616991
ENSG00000245532	NEAT1	638.533	0.58654	0.04658	0.616991
ENSG00000164400	CSF2	7.28742	3.44326	0.0466299	0.616991
ENSG00000111203	ITFG2	284.363	-0.54433	0.0466376	0.616991
ENSG00000115307	AUP1	2818.05	-0.529882	0.0466909	0.616991
ENSG00000259207	ITGB3	55.0206	1.12981	0.0467363	0.616991
ENSG00000216906	AL355312.1	7.22754	-1.79276	0.0467366	0.616991
ENSG00000196296	ATP2A1	22.8704	-1.19998	0.0467427	0.616991
ENSG00000231551	AC245100.4	5.39647	2.91156	0.0467615	0.616991
ENSG00000124104	SNX21	281.76	0.779858	0.0467728	0.616991
ENSG00000133114	GPALPP1	165.431	0.792662	0.0467881	0.616991
ENSG00000112697	TMEM30A	2002.92	0.576872	0.0468738	0.617446
ENSG00000235703	LINC00894	12.5131	1.6153	0.0469896	0.617446
ENSG00000149294	NCAM1	1125.79	0.668503	0.0470089	0.617446
ENSG00000088986	DYNLL1	1494.23	-0.472524	0.0470311	0.617446
ENSG00000185989	RASA3	1863.74	0.522825	0.0470435	0.617446
ENSG00000092470	WDR76	848.753	0.587198	0.0470571	0.617446
ENSG00000154473	BUB3	3384.4	-0.500673	0.0470901	0.617446
ENSG00000260193	AL138781.1	1.50637	-4.69901	0.0471431
ENSG00000240463	RPS19P3	20.0704	-1.56661	0.0471865	0.618209
ENSG00000115750	TAF1B	310.384	0.563827	0.0472267	0.618234
ENSG00000010803	SCMH1	668.641	0.519756	0.0473055	0.618382
ENSG00000066777	ARFGEF1	1186.64	0.652753	0.0473344	0.618382
ENSG00000134452	FBH1	1386.18	-0.466695	0.0473529	0.618382
ENSG00000162144	CYB561A3	372.364	-0.673165	0.0476337	0.621116
ENSG00000119632	IFI27L2	154.878	-1.00935	0.0476728	0.621116
ENSG00000115604	IL18R1	35.6073	1.22321	0.047688	0.621116
ENSG00000133069	TMCC2	101.995	0.733773	0.0477628	0.621116
ENSG00000144591	GMPPA	875.146	0.694335	0.0477769	0.621116
ENSG00000198198	SZT2	1015.02	0.640576	0.047793	0.621116
ENSG00000165724	ZMYND19	395.208	-0.551875	0.0479274	0.622053
ENSG00000113552	GNPDA1	1319.12	-0.501892	0.047942	0.622053
ENSG00000112367	FIG4	136.209	0.631218	0.0480304	0.62251
ENSG00000188690	UROS	742.553	-0.55515	0.0480544	0.62251
ENSG00000138386	NAB1	1101.93	0.664599	0.0482481	0.624519
ENSG00000257086	AP001453.4	12.7556	1.98529	0.0483642	0.62552
ENSG00000164976	MYORG	79.5863	-0.836359	0.0484383	0.625978
ENSG00000167112	TRUB2	758.465	-0.553434	0.0485136	0.626024
ENSG00000109171	SLAIN2	426.829	0.708154	0.0486091	0.626024
ENSG00000130584	ZBTB46	192.163	0.726987	0.0486125	0.626024
ENSG00000177613	CSTF2T	1044.95	-0.546585	0.0486511	0.626024
ENSG00000116688	MFN2	3026.37	0.519776	0.0486674	0.626024
ENSG00000171130	ATP6V0E2	411.12	-0.679959	0.0487836	0.626024
ENSG00000265817	FSBP	38.9015	0.961758	0.048894	0.626024
ENSG00000173465	ZNRD2	287.129	-0.667383	0.0489296	0.626024
ENSG00000165731	RET	4.93126	3.79758	0.0489309	0.626024
ENSG00000227500	SCAMP4	216.763	-0.70954	0.0489544	0.626024
ENSG00000118557	PMFBP1	5.67125	2.72378	0.0490038	0.626024
ENSG00000100644	HIF1A	2647.02	0.542032	0.0490217	0.626024
ENSG00000111846	GCNT2	34.1469	1.27725	0.0490638	0.626024
ENSG00000042286	AIFM2	541.171	-0.528427	0.0491054	0.626024
ENSG00000251474	RPL32P3	85.5645	-0.704017	0.0491211	0.626024
ENSG00000156587	UBE2L6	257.206	-0.766555	0.0491676	0.626024
ENSG00000168710	AHCYL1	3760.74	0.505955	0.0491688	0.626024
ENSG00000170873	MTSS1	85.874	1.235	0.0491957	0.626024
ENSG00000279164	AL118508.2	3.0153	4.45333	0.0492024
ENSG00000247081	BAALC-AS1	90.3156	0.826665	0.0492029	0.626024
ENSG00000153982	GDPD1	12.6964	1.80163	0.0492604	0.626024
ENSG00000100299	ARSA	53.4189	1.22396	0.0492621	0.626024
ENSG00000230797	YY2	4.40495	3.42948	0.0492944	0.626024
ENSG00000112308	C6orf62	602.941	0.606917	0.0493836	0.626529
ENSG00000179299	NSUN7	40.7345	1.08092	0.0494485	0.626529
ENSG00000241764	AC002467.1	27.3918	-1.00362	0.0494586	0.626529
ENSG00000158486	DNAH3	4.23327	-2.5788	0.0495073
ENSG00000123124	WWP1	373.439	0.750314	0.0495617	0.626529
ENSG00000149658	YTHDF1	958.243	-0.739031	0.0495743	0.626529
ENSG00000163472	TMEM79	92.8291	-0.895192	0.0495923	0.626529
ENSG00000038427	VCAN	1587.31	0.867251	0.0496057	0.626529
ENSG00000112305	SMAP1	271.387	0.75418	0.0496834	0.62702
ENSG00000116990	MYCL	15.0204	1.56723	0.0497726	0.627268
ENSG00000138678	GPAT3	383.736	1.07064	0.0497807	0.627268
ENSG00000120688	WBP4	129.841	0.694826	0.0498627	0.627812
ENSG00000131711	MAP1B	6278.39	0.591245	0.0499199	0.628043
ENSG00000149716	LTO1	247.419	-0.548544	0.0500778	0.629539
ENSG00000283050	GTF2IP12	30.371	-0.966222	0.0502167	0.62991
ENSG00000261377	PDCD6IPP2	151.978	0.622434	0.0502253	0.62991
ENSG00000205221	VIT	12.6542	-2.27864	0.0502829	0.62991
ENSG00000103723	AP3B2	12.4691	-1.78824	0.0502858	0.62991
ENSG00000171735	CAMTA1	237.855	0.639331	0.0503024	0.62991
ENSG00000062282	DGAT2	80.7326	1.1159	0.0504018	0.630365
ENSG00000124333	VAMP7	303.943	0.642989	0.0504167	0.630365
ENSG00000171608	PIK3CD	1274.97	0.773355	0.050535	0.631205
ENSG00000108854	SMURF2	785.179	0.518734	0.0505621	0.631205
ENSG00000113448	PDE4D	337.403	0.618173	0.0506703	0.631636
ENSG00000170017	ALCAM	597.121	-1.03603	0.0506747	0.631636
ENSG00000279977	AC008764.10	2.29543	4.09983	0.0507001
ENSG00000155016	CYP2U1	125.419	-0.718871	0.0508112	0.632828
ENSG00000164543	STK17A	676.36	0.701885	0.0509113	0.632828
ENSG00000182912	TSPEAR-AS2	6.49821	-2.10539	0.0509352	0.632828
ENSG00000108666	C17orf75	147.242	0.60301	0.0509442	0.632828
ENSG00000166503	HDGFL3	966.234	0.554218	0.0509696	0.632828
ENSG00000157353	FCSK	128.915	0.701336	0.0510055	0.632828
ENSG00000196378	ZNF34	57.8785	0.822891	0.0510581	0.632995
ENSG00000273619	AL121832.2	38.6899	-0.887304	0.0512891	0.635278
ENSG00000135678	CPM	19.1637	1.71168	0.0513529	0.635278
ENSG00000115355	CCDC88A	1135.68	0.562113	0.0513874	0.635278
ENSG00000035862	TIMP2	231.537	-0.601608	0.051446	0.635278
ENSG00000144043	TEX261	1150.95	-0.516038	0.0514727	0.635278
ENSG00000230316	FEZF1-AS1	1.52778	-4.74387	0.051504
ENSG00000167767	KRT80	1546.11	-1.04702	0.0515257	0.635278
ENSG00000108309	RUNDC3A	5.4334	-2.46117	0.051535	0.635278
ENSG00000212402	SNORA74B	96.0604	-1.17927	0.0515894	0.635278
ENSG00000172586	CHCHD1	468.84	-0.53828	0.0516159	0.635278
ENSG00000167515	TRAPPC2L	641.277	-0.573626	0.0516355	0.635278
ENSG00000080824	HSP90AA1	37025.3	0.504926	0.0517488	0.635895
ENSG00000270540	AC093915.1	4.61773	3.5516	0.0517644	0.635895
ENSG00000101745	ANKRD12	493.409	0.654319	0.0518798	0.636171
ENSG00000092036	HAUS4	246.059	0.540076	0.0519057	0.636171
ENSG00000259121	AL109628.1	18.3753	-1.51083	0.0519322	0.636171
ENSG00000114268	PFKFB4	253.294	0.54608	0.0520031	0.636171
ENSG00000151090	THRB	144.45	0.689153	0.0520417	0.636171
ENSG00000137575	SDCBP	1286.99	0.490881	0.0520599	0.636171
ENSG00000144713	RPL32	6389.08	-0.616914	0.0521477	0.636171
ENSG00000163975	MELTF	266.462	-0.848137	0.0521788	0.636171
ENSG00000078269	SYNJ2	2705.12	0.531977	0.0521875	0.636171
ENSG00000196549	MME	267.623	-0.749159	0.0522116	0.636171
ENSG00000132286	TIMM10B	402.066	-0.551244	0.052278	0.636171
ENSG00000136143	SUCLA2	347.963	0.613047	0.0522928	0.636171
ENSG00000096063	SRPK1	1719.76	0.554753	0.0522988	0.636171
ENSG00000267769	AC011498.6	1.91924	-4.19339	0.0523722
ENSG00000113732	ATP6V0E1	656.87	-0.551273	0.0525664	0.638528
ENSG00000125878	TCF15	37.4587	-0.916678	0.0525717	0.638528
ENSG00000164032	H2AFZ	3418.04	-0.615906	0.0526267	0.638716
ENSG00000259319	AF111167.2	19.9351	1.36243	0.0526832	0.638716
ENSG00000274253	AC138649.1	33.4361	1.1087	0.0527196	0.638716
ENSG00000100485	SOS2	403.413	0.539199	0.0527452	0.638716
ENSG00000133961	NUMB	2118.5	0.593663	0.0528589	0.639613
ENSG00000150768	DLAT	1072.31	0.508213	0.0529381	0.639627
ENSG00000164342	TLR3	28.0809	-0.960764	0.0529393	0.639627
ENSG00000002746	HECW1	206.259	0.654681	0.0530187	0.639737
ENSG00000181754	AMIGO1	186.018	-0.587408	0.0530276	0.639737
ENSG00000169946	ZFPM2	313.994	0.603992	0.0531616	0.640838
ENSG00000276168	RN7SL1	310289	-1.1695	0.0532088	0.640838
ENSG00000162086	ZNF75A	107.715	-0.805255	0.0532797	0.640838
ENSG00000126603	GLIS2	70.0592	-0.921156	0.0533411	0.640838
ENSG00000173334	TRIB1	701.068	0.720174	0.0533539	0.640838
ENSG00000170906	NDUFA3	219.01	-0.797861	0.0533949	0.640838
ENSG00000123384	LRP1	774.796	0.686405	0.0534302	0.640838
ENSG00000163884	KLF15	25.7997	-1.21667	0.0535162	0.640838
ENSG00000108187	PBLD	30.4597	-0.995788	0.0535305	0.640838
ENSG00000158560	DYNC1I1	14.8217	1.44656	0.0535584	0.640838
ENSG00000125089	SH3TC1	311.999	0.703124	0.0535848	0.640838
ENSG00000261488	TBILA	16.0361	-1.36969	0.0536099	0.640838
ENSG00000089127	AC004551.1	20.0197	-1.48707	0.0537	0.640838
ENSG00000197442	MAP3K5	138.84	0.613645	0.053708	0.640838
ENSG00000204536	CCHCR1	485.757	0.500217	0.0537281	0.640838
ENSG00000145592	RPL37	4250.63	-0.890875	0.0537536	0.640838
ENSG00000147548	NSD3	1115.34	0.544549	0.0539052	0.642004
ENSG00000198918	RPL39	360.566	-0.985944	0.0539524	0.642004
ENSG00000237222	LINC01968	10.0468	-1.70151	0.0540519	0.642004
ENSG00000145868	FBXO38	625.307	0.506234	0.0540534	0.642004
ENSG00000130720	FIBCD1	67.507	-0.950277	0.0540581	0.642004
ENSG00000164465	DCBLD1	393.882	0.566742	0.0541063	0.642004
ENSG00000142188	TMEM50B	126.343	0.684457	0.0541451	0.642004
ENSG00000233680	HNRNPA1P27	9.89912	2.04112	0.0541714	0.642004
ENSG00000235408	SNORA71B	3897.37	-1.07484	0.0542181	0.642004
ENSG00000184205	TSPYL2	119.316	0.747667	0.0542672	0.642004
ENSG00000064201	TSPAN32	4.04245	3.3581	0.0542993
ENSG00000168300	PCMTD1	201.27	0.692871	0.0543593	0.642004
ENSG00000148459	PDSS1	205.109	-0.628117	0.0543629	0.642004
ENSG00000273604	EPOP	287.781	0.547218	0.0543873	0.642004
ENSG00000228889	UBAC2-AS1	45.3265	-0.96462	0.0544078	0.642004
ENSG00000100429	HDAC10	12.464	1.90383	0.0546748	0.644658
ENSG00000146247	PHIP	765.621	0.587494	0.0547125	0.644658
ENSG00000188976	NOC2L	3868.13	0.632042	0.0548205	0.64546
ENSG00000137942	FNBP1L	383.346	0.602634	0.0548666	0.645532
ENSG00000137962	ARHGAP29	1994.29	0.482127	0.0550139	0.646793
ENSG00000165895	ARHGAP42	245.029	0.627622	0.0550547	0.646802
ENSG00000198796	ALPK2	28.7373	-1.19236	0.0551767	0.647764
ENSG00000262621	AC025283.2	1.70795	-4.04004	0.0551917
ENSG00000173621	LRFN4	549.963	-0.774712	0.0552424	0.648058
ENSG00000281005	LINC00921	5.69236	-1.93998	0.0552851	0.648058
ENSG00000276386	CNTNAP3P2	34.2708	1.18464	0.0553221	0.648058
ENSG00000187556	NANOS3	3.63343	-2.60312	0.0553799
ENSG00000169218	RSPO1	4.99758	-2.18973	0.0554168	0.648697
ENSG00000185973	TMLHE	82.0696	0.71219	0.0555875	0.649362
ENSG00000164107	HAND2	72.5022	-0.768446	0.0556125	0.649362
ENSG00000188811	NHLRC3	106.528	0.773047	0.055629	0.649362
ENSG00000050405	LIMA1	1352.86	0.746345	0.0556344	0.649362
ENSG00000107130	NCS1	764.303	-0.58426	0.0557081	0.649753
ENSG00000139132	FGD4	115.342	-0.899071	0.0558282	0.650685
ENSG00000131668	BARX1	241.136	-0.796521	0.0560861	0.653219
ENSG00000204188	GGNBP1	1.41757	-4.6185	0.0561403
ENSG00000034677	RNF19A	279.212	0.587084	0.0561601	0.653234
ENSG00000159840	ZYX	852.835	-0.775557	0.0561924	0.653234
ENSG00000120254	MTHFD1L	926.655	0.503748	0.0562087	0.653234
ENSG00000186310	NAP1L3	2.16079	-3.75617	0.0563412
ENSG00000277758	FO681492.1	1.54007	-4.71688	0.0563519
ENSG00000139517	LNX2	208.319	0.616934	0.0564727	0.655256
ENSG00000204463	BAG6	5104.99	0.471383	0.0565276	0.655256
ENSG00000166228	PCBD1	517.727	-0.73764	0.0565399	0.655256
ENSG00000167702	KIFC2	145.676	0.845546	0.0565449	0.655256
ENSG00000076826	CAMSAP3	12.9006	1.59584	0.0565919	0.65533
ENSG00000286048	AC008966.3	9.16416	2.61427	0.0566536	0.655552
ENSG00000170471	RALGAPB	1393.68	0.457446	0.0566922	0.655552
ENSG00000128829	EIF2AK4	2762.9	0.578667	0.0567603	0.65587
ENSG00000128923	MINDY2	625.977	0.615202	0.0568495	0.655885
ENSG00000230202	AL450405.1	60.4126	-0.830931	0.0568887	0.655885
ENSG00000120093	HOXB3	556.649	0.638314	0.0569032	0.655885
ENSG00000119138	KLF9	332.749	0.7762	0.0569625	0.655885
ENSG00000130035	GALNT8	8.95673	-1.84641	0.0569647	0.655885
ENSG00000164850	GPER1	33.3445	-0.983277	0.0570346	0.656222
ENSG00000273162	AL133215.2	31.9628	-1.05986	0.0571141	0.65667
ENSG00000120262	CCDC170	2.26654	4.0978	0.0571302
ENSG00000106211	HSPB1	1003.51	-0.712608	0.0571582	0.656709
ENSG00000185607	ACTBP7	10.8748	-1.47547	0.0572116	0.656855
ENSG00000112293	GPLD1	16.6953	1.4077	0.0572797	0.656874
ENSG00000142751	GPN2	305.437	0.647266	0.0572969	0.656874
ENSG00000174776	WDR49	7.10948	-1.80045	0.0573351	0.656874
ENSG00000175470	PPP2R2D	391.161	-0.516053	0.0573974	0.657121
ENSG00000104325	DECR1	222.252	0.551425	0.0574621	0.657396
ENSG00000259692	AC104041.1	2.57174	4.28085	0.0575245
ENSG00000099822	HCN2	30.0461	-1.03174	0.0575267	0.657485
ENSG00000224531	SMIM13	218.775	0.66109	0.0575513	0.657485
ENSG00000236901	MIR600HG	88.5669	0.916675	0.0576398	0.658031
ENSG00000164849	GPR146	11.4591	-1.46278	0.0577852	0.659225
ENSG00000206538	VGLL3	393.549	-0.622674	0.0579398	0.660384
ENSG00000134184	GSTM1	219.295	-0.710301	0.0579804	0.660384
ENSG00000107929	LARP4B	1779.25	-0.44989	0.058018	0.660384
ENSG00000107957	SH3PXD2A	2262.84	0.622528	0.0580796	0.660384
ENSG00000164221	CCDC112	110.633	0.727175	0.0580983	0.660384
ENSG00000205683	DPF3	487.139	0.6569	0.0581321	0.660384
ENSG00000251593	MSNP1	6.25799	2.40296	0.0582057	0.660756
ENSG00000196754	S100A2	246.741	-0.862646	0.0582688	0.661007
ENSG00000169598	DFFB	93.7355	0.810571	0.0583265	0.661197
ENSG00000089063	TMEM230	717.598	-0.569394	0.0583991	0.661556
ENSG00000214655	ZSWIM8	936.691	-0.537073	0.0584801	0.66201
ENSG00000152763	WDR78	11.0763	1.59274	0.0585836	0.662408
ENSG00000197566	ZNF624	72.0102	0.77711	0.0586016	0.662408
ENSG00000117862	TXNDC12	91.0718	0.810666	0.0586383	0.662408
ENSG00000237271	AC009498.1	1.45127	-4.6354	0.0586524
ENSG00000151468	CCDC3	130.21	-0.778434	0.0588246	0.664048
ENSG00000134294	SLC38A2	4677.99	0.455031	0.0591046	0.666198
ENSG00000165655	ZNF503	113.353	-0.659599	0.0591184	0.666198
ENSG00000172331	BPGM	174.87	0.924819	0.0591388	0.666198
ENSG00000205922	ONECUT3	2.55149	4.26708	0.0592292
ENSG00000174871	CNIH2	122.785	-0.786799	0.05927	0.66721
ENSG00000104093	DMXL2	742.866	0.619181	0.0594815	0.669016
ENSG00000144668	ITGA9	16.5897	-1.50892	0.0595131	0.669016
ENSG00000123091	RNF11	728.023	0.658176	0.0596515	0.669901
ENSG00000023171	GRAMD1B	6591.66	-0.594177	0.0596748	0.669901
ENSG00000162814	SPATA17	5.16171	2.73592	0.0597287	0.669931
ENSG00000250903	GMDS-DT	64.597	1.02375	0.0597604	0.669931
ENSG00000143368	SF3B4	2362.85	-0.530972	0.0598442	0.670404
ENSG00000096093	EFHC1	231.388	0.556547	0.0601513	0.673208
ENSG00000274349	ZNF658	49.1388	0.920544	0.0601851	0.673208
ENSG00000065328	MCM10	1337.47	-0.532102	0.0602466	0.673208
ENSG00000189339	SLC35E2B	878.383	0.612266	0.0603007	0.673208
ENSG00000185298	CCDC137	211.504	-0.605253	0.0603223	0.673208
ENSG00000133731	IMPA1	312.976	0.527632	0.0603445	0.673208
ENSG00000273768	RF00003	40.4686	-1.10796	0.060416	0.673541
ENSG00000115641	FHL2	1368.12	0.507714	0.0606228	0.67487
ENSG00000264229	RNU4ATAC	88.7571	-1.00875	0.0606302	0.67487
ENSG00000115828	QPCT	714.498	-0.753652	0.0608634	0.67487
ENSG00000165949	IFI27	6.118	2.40403	0.0608684	0.67487
ENSG00000131981	LGALS3	619.573	0.737535	0.0608977	0.67487
ENSG00000157613	CREB3L1	68.3287	-0.954654	0.060913	0.67487
ENSG00000254554	AC080023.1	16.1041	-1.32802	0.0609609	0.67487
ENSG00000188938	FAM120AOS	443.926	-0.61968	0.0609857	0.67487
ENSG00000030582	GRN	2018.05	-0.555568	0.0610077	0.67487
ENSG00000244230	RN7SL151P	207.608	-1.12659	0.0610335	0.67487
ENSG00000180530	NRIP1	1186.91	0.648299	0.0610369	0.67487
ENSG00000259803	SLC22A31	5.54474	3.94505	0.0610749	0.67487
ENSG00000134333	LDHA	10401.1	0.436489	0.0610784	0.67487
ENSG00000157445	CACNA2D3	111.171	0.96757	0.061325	0.676835
ENSG00000213741	RPS29	4487.62	-0.638298	0.0613581	0.676835
ENSG00000116406	EDEM3	630.444	0.526389	0.0614181	0.676835
ENSG00000198246	SLC29A3	58.0186	-0.950824	0.0614238	0.676835
ENSG00000162929	KIAA1841	102.253	0.770672	0.0614996	0.677208
ENSG00000273192	AL671710.1	2.08137	-3.5001	0.0615612
ENSG00000037241	RPL26L1	397.497	-0.870878	0.06161	0.677852
ENSG00000161714	PLCD3	344.713	-0.538259	0.0617037	0.677852
ENSG00000272808	AC015712.6	37.2824	1.2056	0.0617488	0.677852
ENSG00000151445	VIPAS39	572.041	0.494894	0.0618125	0.677852
ENSG00000131650	KREMEN2	24.0066	-1.23418	0.0618326	0.677852
ENSG00000143776	CDC42BPA	1079.21	0.513093	0.0618491	0.677852
ENSG00000032219	ARID4A	289.567	0.692622	0.0618518	0.677852
ENSG00000167972	ABCA3	561.602	-0.662057	0.062096	0.679126
ENSG00000130772	MED18	155.524	0.654088	0.0621168	0.679126
ENSG00000067057	PFKP	4338.89	-0.577297	0.0621544	0.679126
ENSG00000162441	LZIC	495.128	0.591042	0.0621609	0.679126
ENSG00000138036	DYNC2LI1	79.1709	0.82345	0.0621783	0.679126
ENSG00000212135	SNORD67	852.431	-0.515668	0.062343	0.680374
ENSG00000127125	PPCS	323.104	0.525206	0.0623768	0.680374
ENSG00000174842	GLMN	143.719	0.673295	0.0625876	0.681861
ENSG00000267666	AC004156.2	2.06067	3.92908	0.0625898
ENSG00000287979	AC253572.2	44.151	0.924879	0.0626007	0.681861
ENSG00000123143	PKN1	1561.25	0.612613	0.0626397	0.681861
ENSG00000108342	CSF3	1257.07	3.45769	0.0628013	0.682826
ENSG00000214389	RPS3AP26	18.7491	-1.55149	0.062931	0.682826
ENSG00000181830	SLC35C1	354.458	-0.516966	0.0629387	0.682826
ENSG00000244265	SIAH2-AS1	8.07009	-1.68419	0.0629544	0.682826
ENSG00000185420	SMYD3	199.505	0.551795	0.0629639	0.682826
ENSG00000270170	NCBP2AS2	204.741	-0.557603	0.062982	0.682826
ENSG00000010810	FYN	357.578	0.715273	0.0630271	0.682831
ENSG00000032444	PNPLA6	797.905	0.677452	0.0631253	0.682831
ENSG00000137266	SLC22A23	97.2626	0.877346	0.0631277	0.682831
ENSG00000254402	LRRC24	7.55101	1.90568	0.0631515	0.682831
ENSG00000155792	DEPTOR	115.086	3.04866	0.0633039	0.683667
ENSG00000159445	THEM4	177.333	0.670352	0.0633261	0.683667
ENSG00000234737	KRT18P15	6.62947	2.10973	0.0633947	0.683667
ENSG00000104853	CLPTM1	1242.31	-0.496119	0.0634328	0.683667
ENSG00000078177	N4BP2	392.752	0.656217	0.0634477	0.683667
ENSG00000250312	ZNF718	22.5087	-1.38908	0.0634942	0.683667
ENSG00000170860	LSM3	375.92	-0.614119	0.063525	0.683667
ENSG00000107872	FBXL15	75.4172	-0.793292	0.0635865	0.683872
ENSG00000135317	SNX14	267.567	0.582974	0.0636321	0.683908
ENSG00000174403	MIR1-1HG-AS1	3.67605	-2.77973	0.0637393
ENSG00000198728	LDB1	601.955	-0.501476	0.0637786	0.685026
ENSG00000197006	METTL9	974.775	0.456589	0.063839	0.685219
ENSG00000155090	KLF10	460.383	-0.506654	0.06396	0.685996
ENSG00000131469	RPL27	2956.4	-0.647469	0.0640045	0.685996
ENSG00000255967	HADHAP2	2.00268	3.90811	0.0640343
ENSG00000143322	ABL2	1386.02	-0.50802	0.0640388	0.685996
ENSG00000089639	GMIP	290.84	0.746669	0.0640922	0.686056
ENSG00000104529	EEF1D	5462.8	0.479817	0.0641293	0.686056
ENSG00000162722	TRIM58	140.433	-0.61876	0.0641736	0.686075
ENSG00000106991	ENG	386.094	-0.68329	0.0642285	0.686208
ENSG00000121966	CXCR4	107.252	-0.629502	0.0644727	0.688363
ENSG00000287382	AC110611.2	2.46054	-3.05626	0.0645364
ENSG00000260910	LINC00565	25.2398	-1.19492	0.0646106	0.689157
ENSG00000064666	CNN2	2298.41	-0.610854	0.0646325	0.689157
ENSG00000286811	AL353138.1	2.80493	-3.62853	0.064671
ENSG00000287587	AL158216.1	3.56357	3.28987	0.0648851
ENSG00000160563	MED27	233.464	-0.570906	0.0649502	0.691465
ENSG00000157214	STEAP2	140.969	0.784972	0.0649649	0.691465
ENSG00000090376	IRAK3	185.438	0.594727	0.0650062	0.691465
ENSG00000141469	SLC14A1	47.6289	2.80688	0.0650424	0.691465
ENSG00000132205	EMILIN2	617.586	-0.474768	0.0650629	0.691465
ENSG00000145494	NDUFS6	532.825	-0.777621	0.0651714	0.691858
ENSG00000104427	ZC2HC1A	142.476	0.691098	0.0651856	0.691858
ENSG00000105996	HOXA2	27.626	1.11793	0.0652778	0.692043
ENSG00000166197	NOLC1	5466.76	-0.470092	0.065313	0.692043
ENSG00000121892	PDS5A	1905.43	0.53636	0.0653427	0.692043
ENSG00000259146	AC005476.2	11.1195	1.58553	0.0653744	0.692043
ENSG00000224858	RPL29P11	10.3396	-1.80661	0.0655688	0.693647
ENSG00000117385	P3H1	1296.86	0.619477	0.0656706	0.694134
ENSG00000112624	BICRAL	155.882	0.626328	0.0657008	0.694134
ENSG00000170006	TMEM154	324.883	0.691191	0.0658529	0.694398
ENSG00000283676	MIR5087	10.946	1.56132	0.0658695	0.694398
ENSG00000069020	MAST4	1006.88	0.463833	0.0659526	0.694398
ENSG00000023516	AKAP11	493.31	0.656197	0.0659915	0.694398
ENSG00000196376	SLC35F1	9.56253	1.89254	0.0660026	0.694398
ENSG00000164692	COL1A2	1.36247	-4.55049	0.06602
ENSG00000124143	ARHGAP40	79.9922	0.706019	0.0660409	0.694398
ENSG00000231770	TMEM44-AS1	34.1184	-0.941557	0.0660678	0.694398
ENSG00000108219	TSPAN14	1116.89	-0.630589	0.0660919	0.694398
ENSG00000146072	TNFRSF21	1111.03	0.64648	0.0661127	0.694398
ENSG00000169926	KLF13	1958.62	0.493195	0.0662946	0.695856
ENSG00000197565	COL4A6	69.5577	-0.846456	0.0663657	0.69615
ENSG00000153044	CENPH	246.893	0.618448	0.0664393	0.696273
ENSG00000165169	DYNLT3	87.9034	0.668956	0.0664636	0.696273
ENSG00000172809	RPL38	2758.36	-0.799154	0.066672	0.698004
ENSG00000276170	AC244153.1	160.867	-0.567427	0.0667812	0.6984
ENSG00000116584	ARHGEF2	437.237	0.58664	0.0668536	0.6984
ENSG00000200312	RN7SKP255	37.9015	-1.33841	0.06686	0.6984
ENSG00000108021	TASOR2	2195.52	-0.491934	0.0668828	0.6984
ENSG00000282849	AL359834.1	1.61915	-3.96479	0.0670259
ENSG00000273356	LINC02019	3.80785	-2.31979	0.067078
ENSG00000232693	AC012370.1	2.03979	3.90977	0.0670949
ENSG00000141524	TMC6	50.3103	0.768016	0.0670995	0.69883
ENSG00000164674	SYTL3	18.8575	-1.09016	0.0671202	0.69883
ENSG00000167065	DUSP18	48.8354	0.886742	0.0671789	0.69883
ENSG00000151233	GXYLT1	315.585	0.611247	0.0672022	0.69883
ENSG00000143924	EML4	2267.26	0.788872	0.0672198	0.69883
ENSG00000107819	SFXN3	1634.3	-0.509819	0.0672645	0.69883
ENSG00000141665	FBXO15	11.0369	1.66616	0.0673239	0.69883
ENSG00000259006	AC092143.2	29.8603	-0.891253	0.0673578	0.69883
ENSG00000162458	FBLIM1	558.244	0.515648	0.0674601	0.69883
ENSG00000154856	APCDD1	5.4298	2.82246	0.0674757	0.69883
ENSG00000171311	EXOSC1	360.675	-0.709915	0.0674768	0.69883
ENSG00000118292	C1orf54	4.52691	-2.09064	0.0674933	0.69883
ENSG00000169213	RAB3B	1320.28	0.696002	0.0675619	0.69883
ENSG00000095139	ARCN1	2680.4	0.509738	0.0675683	0.69883
ENSG00000162976	PQLC3	58.3984	0.810463	0.0675729	0.69883
ENSG00000224081	SLC44A3-AS1	10.0946	2.18839	0.0676813	0.69909
ENSG00000104408	EIF3E	3505.85	0.464068	0.0677392	0.69909
ENSG00000104518	GSDMD	855.98	0.571895	0.0677728	0.69909
ENSG00000178028	DMAP1	553.913	0.595859	0.0677902	0.69909
ENSG00000172638	EFEMP2	393.745	-0.770128	0.0678144	0.69909
ENSG00000205649	HTN3	1.38388	-4.60064	0.0678496
ENSG00000146070	PLA2G7	23.313	1.27917	0.0678819	0.699241
ENSG00000204519	ZNF551	113.862	-1.20221	0.0679156	0.699241
ENSG00000180914	OXTR	22.3805	-1.00179	0.0679724	0.69938
ENSG00000169762	TAPT1	148.945	0.620206	0.0680663	0.699693
ENSG00000125820	NKX2-2	29.5255	-0.988655	0.0681175	0.699693
ENSG00000160055	TMEM234	93.1924	0.878924	0.0681328	0.699693
ENSG00000276550	HERC2P2	386.235	0.642212	0.0681901	0.69972
ENSG00000167202	TBC1D2B	1668.38	-0.509323	0.0682221	0.69972
ENSG00000231940	RPS7P3	12.3057	-1.67116	0.0682752	0.699821
ENSG00000125944	HNRNPR	2394.41	0.436054	0.0684223	0.700016
ENSG00000162437	RAVER2	562.642	0.485744	0.0684545	0.700016
ENSG00000184497	TMEM255B	200.891	1.10835	0.0684698	0.700016
ENSG00000219274	RPS20P2	18.0448	-1.2902	0.0685036	0.700016
ENSG00000137496	IL18BP	84.4107	-0.623831	0.0685109	0.700016
ENSG00000111879	FAM184A	45.9926	1.10506	0.0686818	0.701319
ENSG00000116691	MIIP	374.155	0.592922	0.0687653	0.701728
ENSG00000037637	FBXO42	439.804	0.606012	0.0688156	0.701751
ENSG00000173660	UQCRH	2524.93	0.546007	0.0688771	0.701751
ENSG00000197746	PSAP	12425.9	-0.491042	0.0690252	0.701751
ENSG00000223773	CD99P1	12.8386	1.46095	0.0690253	0.701751
ENSG00000112659	CUL9	571.888	0.501106	0.0690392	0.701751
ENSG00000137309	HMGA1	12758.6	0.633594	0.0690612	0.701751
ENSG00000171421	MRPL36	589.621	-0.579088	0.0690717	0.701751
ENSG00000139263	LRIG3	141.629	0.607847	0.0691413	0.702017
ENSG00000149357	LAMTOR1	795.133	-0.577221	0.0692138	0.702311
ENSG00000204406	MBD5	193.987	0.551549	0.0695247	0.705023
ENSG00000085433	WDR47	375.677	0.546913	0.0696856	0.705507
ENSG00000127191	TRAF2	331.023	-0.570626	0.0697182	0.705507
ENSG00000233276	GPX1	553.897	-0.819621	0.0697814	0.705507
ENSG00000162688	AGL	437.158	0.620824	0.0697866	0.705507
ENSG00000183578	TNFAIP8L3	74.6243	-0.855117	0.0697907	0.705507
ENSG00000238062	SPATA3-AS1	19.2233	-1.15174	0.0698396	0.705559
ENSG00000169136	ATF5	74.5631	-0.892652	0.0699611	0.706345
ENSG00000107937	GTPBP4	2030.63	-0.473763	0.0700432	0.706483
ENSG00000154265	ABCA5	29.1121	1.02569	0.0700623	0.706483
ENSG00000166188	ZNF319	146.969	-0.544282	0.0701997	0.706646
ENSG00000234602	MCIDAS	97.7874	-0.783447	0.0702009	0.706646
ENSG00000128973	CLN6	532.367	-0.575126	0.0702379	0.706646
ENSG00000269893	SNHG8	307.017	-0.704701	0.0702534	0.706646
ENSG00000164402	SEPT8	780.896	0.469978	0.0705289	0.708889
ENSG00000144867	SRPRB	1067.83	-0.612941	0.0706607	0.708889
ENSG00000126003	PLAGL2	925.806	-0.590091	0.0707215	0.708889
ENSG00000155252	PI4K2A	398.384	-0.563843	0.0707778	0.708889
ENSG00000199667	RF00019	1.984	3.85334	0.0708049
ENSG00000223745	CCDC18-AS1	53.3997	0.991046	0.0708116	0.708889
ENSG00000139832	RAB20	120.09	0.700841	0.0708725	0.708889
ENSG00000173848	NET1	3493.3	0.46136	0.0709462	0.708889
ENSG00000017797	RALBP1	1378.21	0.483323	0.0709576	0.708889
ENSG00000166145	SPINT1	27.3528	1.48833	0.0709611	0.708889
ENSG00000129003	VPS13C	2000.83	0.650381	0.0710361	0.708889
ENSG00000250067	YJEFN3	16.4383	-1.10211	0.0710495	0.708889
ENSG00000180879	SSR4	1107.36	-0.573611	0.0710772	0.708889
ENSG00000148335	NTMT1	470.979	-0.513836	0.071083	0.708889
ENSG00000130638	ATXN10	1062.43	0.463254	0.0711709	0.708889
ENSG00000086015	MAST2	1141.25	0.496941	0.071185	0.708889
ENSG00000121957	GPSM2	989.405	0.657992	0.0712217	0.708889
ENSG00000175066	GK5	226.07	0.591241	0.0712322	0.708889
ENSG00000162607	USP1	1350.83	0.602249	0.0712776	0.708889
ENSG00000154134	ROBO3	317.903	0.670116	0.0713227	0.708889
ENSG00000084072	PPIE	878.023	0.517422	0.0713854	0.708889
ENSG00000134602	STK26	842.112	0.519336	0.0714375	0.708889
ENSG00000197702	PARVA	368.679	-0.7946	0.0714418	0.708889
ENSG00000165632	TAF3	253.988	-0.518401	0.0716379	0.710016
ENSG00000138463	SLC49A4	222.632	-0.642394	0.0716681	0.710016
ENSG00000198121	LPAR1	47.9992	-1.19454	0.0716873	0.710016
ENSG00000108582	CPD	227.695	0.690611	0.0717467	0.710169
ENSG00000081760	AACS	456.291	-0.551866	0.071951	0.711756
ENSG00000278341	AC138028.6	6.19221	-2.00713	0.0719987	0.711791
ENSG00000236104	ZBTB22	164.041	0.710653	0.0721411	0.712494
ENSG00000175334	BANF1	2209.09	-0.449923	0.0721649	0.712494
ENSG00000187091	PLCD1	128.238	0.648466	0.0722021	0.712494
ENSG00000085871	MGST2	129.801	-0.948311	0.0722661	0.71269
ENSG00000172915	NBEA	177.234	0.953267	0.0723481	0.712939
ENSG00000184270	HIST2H2AB	2352.65	-0.487112	0.0723796	0.712939
ENSG00000237506	RPSAP15	4.29601	-2.33395	0.0724576
ENSG00000211459	MT-RNR1	34927.1	-0.694786	0.0724712	0.713048
ENSG00000123200	ZC3H13	467.138	0.557794	0.072522	0.713048
ENSG00000215039	CD27-AS1	8.6341	1.78805	0.0725403	0.713048
ENSG00000137709	POU2F3	9.48944	-1.46303	0.0725672	0.713048
ENSG00000163874	ZC3H12A	309.711	1.15196	0.0726235	0.713167
ENSG00000215252	GOLGA8B	106.095	0.663975	0.0726722	0.713211
ENSG00000024048	UBR2	498.697	0.555672	0.0728347	0.714235
ENSG00000135541	AHI1	136.564	0.647106	0.0728701	0.714235
ENSG00000165626	BEND7	111.313	-0.654165	0.0729784	0.714235
ENSG00000168569	TMEM223	172.593	-0.674094	0.0730222	0.714235
ENSG00000159720	ATP6V0D1	823.854	-0.67884	0.0730501	0.714235
ENSG00000261794	GOLGA8H	19.1048	1.36516	0.0730806	0.714235
ENSG00000113658	SMAD5	907.818	0.487924	0.073086	0.714235
ENSG00000237596	AL138828.1	7.02177	-2.01698	0.0731814	0.714735
ENSG00000181894	ZNF329	89.132	0.819122	0.0733364	0.715817
ENSG00000005187	ACSM3	4.53677	2.71353	0.0734362	0.716282
ENSG00000229692	SOS1-IT1	13.0771	1.49355	0.0734727	0.716282
ENSG00000007376	RPUSD1	463.873	-0.668657	0.0735743	0.71648
ENSG00000099364	FBXL19	666.813	-0.469215	0.0735818	0.71648
ENSG00000114529	C3orf52	170.956	-0.696435	0.0737177	0.717122
ENSG00000279170	TSTD3	29.8368	1.09097	0.0737707	0.717122
ENSG00000152465	NMT2	471.299	-0.584986	0.0738188	0.717122
ENSG00000128607	KLHDC10	431.111	0.509763	0.073841	0.717122
ENSG00000167889	MGAT5B	154.888	-0.56028	0.0738697	0.717122
ENSG00000123975	CKS2	450.858	-0.715343	0.0739324	0.717299
ENSG00000186792	HYAL3	79.5606	-0.836824	0.0740524	0.717389
ENSG00000119977	TCTN3	641.014	-0.485871	0.0740956	0.717389
ENSG00000031003	FAM13B	330.619	-0.737101	0.0741014	0.717389
ENSG00000162614	NEXN	83.1384	-0.64003	0.0742358	0.717389
ENSG00000158258	CLSTN2	44.4212	-1.32525	0.0742549	0.717389
ENSG00000129255	MPDU1	1619.65	-0.499609	0.0742552	0.717389
ENSG00000164167	LSM6	145.398	-0.710433	0.0743078	0.717389
ENSG00000100142	POLR2F	379.447	-0.684285	0.0743324	0.717389
ENSG00000123473	STIL	861.506	0.509395	0.0743729	0.717389
ENSG00000278730	AC005332.6	82.9125	0.774913	0.0744101	0.717389
ENSG00000048162	NOP16	844.406	-0.54007	0.0744301	0.717389
ENSG00000269973	AC010969.2	52.9042	0.782098	0.0744807	0.717449
ENSG00000125629	INSIG2	90.3331	0.682506	0.0746302	0.71846
ENSG00000171680	PLEKHG5	722.353	0.758714	0.0747566	0.719248
ENSG00000166575	TMEM135	229.801	0.568455	0.074846	0.719334
ENSG00000284753	EEF1AKMT4	39.431	-0.99064	0.0748546	0.719334
ENSG00000050393	MCUR1	237.778	0.599869	0.0749536	0.719523
ENSG00000204386	NEU1	795.041	-0.580666	0.0749633	0.719523
ENSG00000013588	GPRC5A	1068.8	-0.780629	0.0750895	0.720306
ENSG00000175764	TTLL11	102.237	-0.695399	0.0752435	0.721355
ENSG00000069849	ATP1B3	1068.31	-0.524092	0.0753046	0.721513
ENSG00000126749	EMG1	957.488	-0.527534	0.0756339	0.72363
ENSG00000162623	TYW3	387.842	0.463061	0.0756588	0.72363
ENSG00000127124	HIVEP3	791.004	0.538035	0.075688	0.72363
ENSG00000154814	OXNAD1	211.312	-0.579719	0.0757048	0.72363
ENSG00000241749	RPSAP52	40.3492	1.62703	0.0757831	0.72395
ENSG00000109107	ALDOC	99.015	-0.916034	0.0759941	0.724596
ENSG00000009830	POMT2	750.813	-0.460628	0.0760031	0.724596
ENSG00000137501	SYTL2	224.566	-0.587773	0.0760539	0.724596
ENSG00000122824	NUDT10	12.3397	-1.56597	0.0760543	0.724596
ENSG00000067248	DHX29	339.548	0.619495	0.0760906	0.724596
ENSG00000273542	HIST1H4K	383.512	-1.02913	0.076223	0.724596
ENSG00000099958	DERL3	11.5782	1.60813	0.0762395	0.724596
ENSG00000151338	MIPOL1	188.348	0.599625	0.0762851	0.724596
ENSG00000168671	UGT3A2	13.702	-1.46587	0.0762932	0.724596
ENSG00000268333	AL132655.1	16.0079	-1.1201	0.0762992	0.724596
ENSG00000284693	LINC02606	23.6952	1.03352	0.0764874	0.725724
ENSG00000258881	AC007040.2	42.9094	-0.795754	0.0766086	0.725724
ENSG00000122756	CNTFR	1.59775	-3.90923	0.076658
ENSG00000236432	AC097662.1	33.2749	-0.848448	0.0766802	0.725724
ENSG00000214711	CAPN14	11.972	1.41978	0.0766877	0.725724
ENSG00000132294	EFR3A	897.662	0.519451	0.076727	0.725724
ENSG00000184470	TXNRD2	672.674	-0.521772	0.0767288	0.725724
ENSG00000136770	DNAJC1	318.949	-0.594397	0.0768335	0.725724
ENSG00000105722	ERF	614.439	-0.564197	0.0768711	0.725724
ENSG00000116299	KIAA1324	6.88384	-2.30749	0.0768755	0.725724
ENSG00000162545	CAMK2N1	157.159	0.697804	0.0769092	0.725724
ENSG00000213071	LPAL2	17.2127	-1.06201	0.0769122	0.725724
ENSG00000154803	FLCN	414.956	-0.617002	0.0770043	0.726169
ENSG00000156162	DPY19L4	415.612	0.681234	0.0770834	0.726439
ENSG00000262049	AC139530.2	24.7288	-0.980154	0.0771712	0.726439
ENSG00000143952	VPS54	330.089	0.563483	0.0771763	0.726439
ENSG00000182541	LIMK2	237.556	-0.588941	0.0772129	0.726439
ENSG00000169193	CCDC126	37.0154	0.82639	0.0775186	0.727322
ENSG00000228397	LINC01635	15.2211	1.42347	0.0775361	0.727322
ENSG00000133704	IPO8	725.156	0.603708	0.0775599	0.727322
ENSG00000196743	GM2A	479.962	0.47871	0.0775779	0.727322
ENSG00000090530	P3H2	620.604	-0.713303	0.0776154	0.727322
ENSG00000135114	OASL	476.268	-0.742244	0.0776214	0.727322
ENSG00000157064	NMNAT2	322.184	0.60257	0.0776356	0.727322
ENSG00000182580	EPHB3	35.1142	-0.832339	0.0776841	0.727322
ENSG00000287676	AC096642.2	1.99222	3.8395	0.0777361
ENSG00000159214	CCDC24	69.2595	0.849084	0.0777812	0.727322
ENSG00000124920	MYRF	297.039	0.737357	0.0778606	0.727322
ENSG00000231298	MANCR	29.0525	-1.37646	0.0778995	0.727322
ENSG00000130513	GDF15	38.7152	1.28571	0.0779135	0.727322
ENSG00000081177	EXD2	524.61	0.472377	0.0779208	0.727322
ENSG00000198551	ZNF627	135.495	0.622879	0.077937	0.727322
ENSG00000134644	PUM1	1252.16	0.50192	0.0779929	0.727424
ENSG00000188707	ZBED6CL	151.197	-0.549949	0.0781107	0.727715
ENSG00000182489	XKRX	63.0736	1.10171	0.078116	0.727715
ENSG00000265241	RBM8A	2152.49	-0.52217	0.0781594	0.727715
ENSG00000130675	MNX1	109.444	1.1103	0.0782365	0.727938
ENSG00000263823	AC009831.1	4.12775	-2.07627	0.0782891
ENSG00000068878	PSME4	2117.93	0.639996	0.0783057	0.727938
ENSG00000165424	ZCCHC24	343.415	0.945013	0.0784065	0.727938
ENSG00000171206	TRIM8	1370.79	-0.505417	0.0784224	0.727938
ENSG00000248334	WHAMMP2	34.2124	0.879454	0.07846	0.727938
ENSG00000228010	AC073343.2	2.22562	4.07648	0.0784622
ENSG00000279453	Z99129.4	48.4882	0.76763	0.0784809	0.727938
ENSG00000100934	SEC23A	1980.38	0.433279	0.0784987	0.727938
ENSG00000272159	AC087623.3	1.56263	-3.90959	0.0786538
ENSG00000276023	DUSP14	323.611	-0.514164	0.078682	0.72844
ENSG00000176490	DIRAS1	51.6952	-0.797269	0.0787328	0.72844
ENSG00000010017	RANBP9	252.711	0.575359	0.0787387	0.72844
ENSG00000241058	NSUN6	125.035	-0.628643	0.0787626	0.72844
ENSG00000077254	USP33	568.992	0.636014	0.0787783	0.72844
ENSG00000277161	PIGW	290.749	-0.547877	0.0789398	0.729516
ENSG00000155111	CDK19	224.437	0.60999	0.0790369	0.729995
ENSG00000239672	NME1	588.744	-0.656967	0.0793105	0.730628
ENSG00000121454	LHX4	51.4559	0.864298	0.0793381	0.730628
ENSG00000232176	AL161909.1	5.61105	-1.86942	0.0793455	0.730628
ENSG00000167716	WDR81	991.166	-0.538045	0.0794822	0.730628
ENSG00000264585	MIR4449	574.925	-0.960169	0.0795154	0.730628
ENSG00000172348	RCAN2	103.396	1.16187	0.0795324	0.730628
ENSG00000251442	LINC01094	6.71518	-1.89989	0.0796186	0.730628
ENSG00000253982	AC100810.1	49.3386	0.754601	0.0796295	0.730628
ENSG00000233223	AC016876.1	86.8851	-0.624975	0.0796534	0.730628
ENSG00000119523	ALG2	356.201	-0.487103	0.0796943	0.730628
ENSG00000124532	MRS2	209.13	0.534652	0.0797355	0.730628
ENSG00000197555	SIPA1L1	2901.05	0.82959	0.079817	0.730628
ENSG00000149311	ATM	1131.16	0.537225	0.079838	0.730628
ENSG00000173253	DMRT2	30.2963	1.35035	0.0798394	0.730628
ENSG00000009413	REV3L	481.96	0.521204	0.0799002	0.730628
ENSG00000111981	ULBP1	96.6718	0.878937	0.0799284	0.730628
ENSG00000275896	PRSS2	6.59318	2.67927	0.0799501	0.730628
ENSG00000119673	ACOT2	132.424	-0.535798	0.080094	0.730628
ENSG00000092871	RFFL	159.493	0.659737	0.0800983	0.730628
ENSG00000261754	AC008555.1	3.49779	3.28213	0.0801091
ENSG00000103353	UBFD1	797.738	-0.4728	0.0801686	0.730628
ENSG00000122008	POLK	282.638	0.541422	0.080183	0.730628
ENSG00000115738	ID2	34.9392	-1.16098	0.0802266	0.730628
ENSG00000104967	NOVA2	190.344	-0.82842	0.0802707	0.730628
ENSG00000177606	JUN	2993.41	0.720764	0.0803076	0.730628
ENSG00000198793	MTOR	1930.18	0.44653	0.0803169	0.730628
ENSG00000101134	DOK5	38.7069	0.81803	0.0803185	0.730628
ENSG00000259612	EEF1A1P22	313.471	0.484146	0.0803357	0.730628
ENSG00000040531	CTNS	271.994	-0.488294	0.0803938	0.730628
ENSG00000070367	EXOC5	1312.84	0.524974	0.080417	0.730628
ENSG00000146731	CCT6A	5882.86	0.437834	0.0805496	0.730858
ENSG00000112715	VEGFA	3136.97	1.61857	0.08062	0.730858
ENSG00000143494	VASH2	30.6823	1.12486	0.0806446	0.730858
ENSG00000078902	TOLLIP	551.069	-0.592734	0.0806628	0.730858
ENSG00000236056	GAPDHP14	37.9811	-0.863925	0.0806934	0.730858
ENSG00000173898	SPTBN2	2077.36	0.447652	0.0807138	0.730858
ENSG00000077092	RARB	67.0453	0.908759	0.0807806	0.731054
ENSG00000144118	RALB	631.712	0.523636	0.080898	0.731465
ENSG00000244245	AC133134.1	16.717	-1.17843	0.0809299	0.731465
ENSG00000117228	GBP1	6.91154	-1.63167	0.0809981	0.731465
ENSG00000162073	PAQR4	498.269	-0.52773	0.0810073	0.731465
ENSG00000170425	ADORA2B	587.515	0.67325	0.0812021	0.732804
ENSG00000116679	IVNS1ABP	1156.17	0.532121	0.0812463	0.732804
ENSG00000272703	AP005137.2	1.58288	-4.79581	0.0812725
ENSG00000235448	LURAP1L-AS1	3.82978	-2.50804	0.0812819
ENSG00000186854	TRABD2A	398.834	-0.501243	0.0813629	0.732894
ENSG00000273247	AC097376.2	19.9154	-1.02622	0.0814158	0.732894
ENSG00000138468	SENP7	102.202	0.681814	0.0814565	0.732894
ENSG00000106785	TRIM14	312.613	-0.623977	0.0814783	0.732894
ENSG00000164329	TENT2	396.765	0.49211	0.0814831	0.732894
ENSG00000095015	MAP3K1	400.523	0.6825	0.0815787	0.733346
ENSG00000156475	PPP2R2B	5.09838	-2.0634	0.081735	0.733988
ENSG00000115109	EPB41L5	244.909	0.550157	0.0817451	0.733988
ENSG00000071051	NCK2	395.7	0.447045	0.0818448	0.733988
ENSG00000183763	TRAIP	274.768	-0.503294	0.0818662	0.733988
ENSG00000142867	BCL10	344.59	0.511891	0.0819744	0.733988
ENSG00000158042	MRPL17	1145.78	-0.592459	0.0820112	0.733988
ENSG00000218175	AC016739.1	10.343	-1.47913	0.0820424	0.733988
ENSG00000165548	TMEM63C	29.3628	-0.938368	0.0821491	0.733988
ENSG00000128283	CDC42EP1	628.138	-0.904506	0.0821496	0.733988
ENSG00000168517	HEXIM2	40.2755	-0.79365	0.0821619	0.733988
ENSG00000160049	DFFA	1408.24	0.460421	0.0822505	0.733988
ENSG00000037042	TUBG2	133.135	0.740941	0.0822765	0.733988
ENSG00000147655	RSPO2	2.70209	-2.906	0.0823231
ENSG00000053747	LAMA3	443.993	0.60895	0.0823345	0.733988
ENSG00000105518	TMEM205	195.764	0.557666	0.0823827	0.733988
ENSG00000273274	ZBTB8B	4.43372	2.47365	0.0824095	0.733988
ENSG00000175879	HOXD8	104.302	0.613278	0.0824145	0.733988
ENSG00000261324	AC010168.2	28.8294	-1.07879	0.0824225	0.733988
ENSG00000178307	TMEM11	269.942	-0.532459	0.0824898	0.734177
ENSG00000196114	AL031577.1	1.85301	-3.38165	0.0826608
ENSG00000111885	MAN1A1	185.126	0.585348	0.0826751	0.734177
ENSG00000104375	STK3	167.381	0.613058	0.0827197	0.734177
ENSG00000235776	AC000089.1	9.50685	-1.71992	0.0827468	0.734177
ENSG00000132780	NASP	2422.71	0.434921	0.0827739	0.734177
ENSG00000115556	PLCD4	15.1878	-1.2487	0.082796	0.734177
ENSG00000100503	NIN	2195.22	0.423634	0.0828017	0.734177
ENSG00000240065	PSMB9	141.009	-0.650132	0.0828535	0.734177
ENSG00000116350	SRSF4	328.32	0.591446	0.0828653	0.734177
ENSG00000156265	MAP3K7CL	62.6759	-0.854052	0.0828983	0.734177
ENSG00000111639	MRPL51	945.351	-0.502215	0.0829554	0.73428
ENSG00000184564	SLITRK6	3.19721	-2.87347	0.0829836
ENSG00000272764	AL596094.1	12.8678	-1.19621	0.0831579	0.735488
ENSG00000151116	UEVLD	187.748	0.570973	0.0832311	0.735488
ENSG00000253161	LINC01605	132.184	1.21861	0.0832397	0.735488
ENSG00000259291	ZNF710-AS1	36.9818	1.20535	0.083274	0.735488
ENSG00000153233	PTPRR	6.9506	-1.94985	0.0834013	0.73621
ENSG00000142065	ZFP14	2.54929	4.2741	0.083423
ENSG00000101363	MANBAL	1026.09	-0.445515	0.0835221	0.736874
ENSG00000250899	AC125807.2	397.257	-0.465776	0.0836104	0.73725
ENSG00000274211	SOCS7	400.582	0.536528	0.0837014	0.73765
ENSG00000135452	TSPAN31	198.186	0.534882	0.0839908	0.739427
ENSG00000067064	IDI1	574.195	-0.777378	0.0839945	0.739427
ENSG00000130005	GAMT	681.135	0.587052	0.0842615	0.741373
ENSG00000129194	SOX15	8.58805	-1.52916	0.0844943	0.742698
ENSG00000141858	SAMD1	386.201	0.654798	0.0845747	0.742698
ENSG00000140835	CHST4	13.4962	-1.71776	0.0845852	0.742698
ENSG00000121753	ADGRB2	287.617	0.60187	0.0846546	0.742698
ENSG00000166173	LARP6	664.28	0.684811	0.0846787	0.742698
ENSG00000215302	AC127502.1	38.8143	0.996451	0.0846879	0.742698
ENSG00000175582	RAB6A	743.651	0.454763	0.0848301	0.743118
ENSG00000238290	AL034417.2	5.3075	2.35016	0.0848872	0.743118
ENSG00000136235	GPNMB	90.2686	-0.895929	0.0849078	0.743118
ENSG00000158186	MRAS	156.089	-0.739566	0.0849607	0.743118
ENSG00000151532	VTI1A	450.067	-0.500833	0.0849857	0.743118
ENSG00000133878	DUSP26	2.50742	-2.90574	0.0850048
ENSG00000203635	AC144450.1	6.11723	-1.78779	0.0850119	0.743118
ENSG00000149428	HYOU1	7043.61	0.525385	0.0850979	0.743298
ENSG00000106086	PLEKHA8	400.493	0.555851	0.0851245	0.743298
ENSG00000143570	SLC39A1	27.6927	-0.915559	0.0852131	0.743669
ENSG00000162572	SCNN1D	45.6588	1.17115	0.0853921	0.744748
ENSG00000147117	ZNF157	1.80262	3.71996	0.0854249
ENSG00000256603	AP003170.4	1.80262	3.71996	0.0854249
ENSG00000133874	RNF122	45.1113	0.822008	0.085552	0.744748
ENSG00000202058	RN7SKP80	24.9392	-1.3958	0.0855575	0.744748
ENSG00000198324	PHETA1	97.0813	-0.599845	0.0855654	0.744748
ENSG00000137145	DENND4C	442.29	0.523629	0.0855736	0.744748
ENSG00000074695	LMAN1	2683.02	0.486863	0.0856132	0.744748
ENSG00000265558	MIR3918	1.82973	3.77007	0.0856182
ENSG00000234219	CDCA4P4	2.08016	-3.42122	0.0856496
ENSG00000249476	AC008467.1	3.28705	3.14028	0.0856958
ENSG00000171316	CHD7	1857.88	0.545223	0.0857028	0.745125
ENSG00000135052	GOLM1	1476.37	-0.59337	0.0858255	0.745791
ENSG00000227150	AL669970.2	1.30737	-4.48073	0.0859423
ENSG00000253873	PCDHGA11	1.30737	-4.48073	0.0859423
ENSG00000110619	CARS	2179.66	0.557439	0.0859864	0.746787
ENSG00000132842	AP3B1	1113.79	0.476778	0.0861122	0.747257
ENSG00000176105	YES1	1308.99	0.44117	0.0861331	0.747257
ENSG00000142669	SH3BGRL3	1377.21	0.803475	0.0862583	0.747312
ENSG00000112640	PPP2R5D	772.244	0.633511	0.0863304	0.747312
ENSG00000141293	SKAP1	39.4178	3.04945	0.0863515	0.747312
ENSG00000134748	PRPF38A	814.205	0.440165	0.0864075	0.747312
ENSG00000114446	IFT57	337.52	-0.488695	0.086465	0.747312
ENSG00000046647	GEMIN8	54.9073	0.728978	0.0864748	0.747312
ENSG00000113739	STC2	656.631	-0.75098	0.0864768	0.747312
ENSG00000065357	DGKA	175.001	0.655676	0.0865094	0.747312
ENSG00000214866	DCDC2C	3.3674	-2.76349	0.0866781
ENSG00000141446	ESCO1	450.751	0.457753	0.0867175	0.748394
ENSG00000137714	FDX1	135.648	0.563779	0.0867273	0.748394
ENSG00000108094	CUL2	706.868	-0.443538	0.0869918	0.750275
ENSG00000263841	RN7SL44P	92.2346	-1.20817	0.0870658	0.750512
ENSG00000174574	AKIRIN1	1031.2	0.529101	0.0871824	0.750714
ENSG00000164054	SHISA5	1763.96	-0.605289	0.0872037	0.750714
ENSG00000120696	KBTBD7	69.4709	0.873385	0.0872873	0.750714
ENSG00000241990	PRR34-AS1	8.0581	1.88709	0.0873772	0.750714
ENSG00000123146	ADGRE5	760.783	-0.511572	0.0875063	0.750714
ENSG00000125787	GNRH2	3.37786	-2.42541	0.0875235
ENSG00000253284	AC092828.1	5.48239	2.34658	0.0875677	0.750714
ENSG00000225706	PTPRD-AS1	13.6307	-1.20954	0.0875687	0.750714
ENSG00000204160	ZDHHC18	451.73	0.517514	0.087571	0.750714
ENSG00000228624	HDAC2-AS2	11.6518	-1.51249	0.0876062	0.750714
ENSG00000103855	CD276	1288.43	-0.476125	0.0876427	0.750714
ENSG00000132485	ZRANB2	665.276	0.492858	0.0876641	0.750714
ENSG00000164099	PRSS12	285.054	0.713888	0.0878506	0.750714
ENSG00000196911	KPNA5	81.9253	0.757603	0.0878521	0.750714
ENSG00000164379	FOXQ1	41.069	2.50816	0.0878548	0.750714
ENSG00000175895	PLEKHF2	213.538	0.639877	0.0878937	0.750714
ENSG00000074935	TUBE1	91.3477	0.64241	0.0879248	0.750714
ENSG00000114062	UBE3A	1798.19	0.488927	0.0879764	0.750714
ENSG00000116922	C1orf109	406.245	0.520491	0.0880604	0.750714
ENSG00000125841	NRSN2	411.754	-0.477968	0.0881325	0.750714
ENSG00000057019	DCBLD2	5084.77	0.899691	0.0882469	0.750714
ENSG00000134146	DPH6	130.918	0.650659	0.0882535	0.750714
ENSG00000160948	VPS28	509.993	0.647622	0.0882546	0.750714
ENSG00000144227	NXPH2	39.6164	-1.09793	0.0883999	0.750714
ENSG00000254634	SMG1P6	5.03961	2.2395	0.0884438	0.750714
ENSG00000136436	CALCOCO2	570.271	0.442858	0.0884442	0.750714
ENSG00000166831	RBPMS2	127.566	-0.711996	0.0884488	0.750714
ENSG00000144711	IQSEC1	454.095	-0.630441	0.0885168	0.750714
ENSG00000151092	NGLY1	328.728	0.484798	0.0885239	0.750714
ENSG00000172081	MOB3A	726.08	0.501095	0.0885454	0.750714
ENSG00000090612	ZNF268	201.577	-0.683207	0.0886258	0.750714
ENSG00000135074	ADAM19	4583.07	-0.490555	0.0887096	0.750714
ENSG00000180992	MRPL14	589.598	-0.49543	0.0887426	0.750714
[truncated: 28,213 more rows]

## Sheet: Mut70_vs_Mut50
EnsemblId	Gene	baseMean	log2FoldChange	pvalue	padj	DEGs	description	aliases	designations	nomenclaturename	summary	atlas	ensembl	ncbi	pubmed	pubmed10
ENSG00000136999	CCN3	526.901	4.98025	2.08909e-49	3.28928e-45	Y	cellular communication network factor 3	IBP-9, IGFBP-9, IGFBP9, NOV, NOVh	CCN family member 3|IGF-binding protein 9|insulin-like growth factor-binding protein 9|nephro blastoma-overexpressed gene protein homolog|nephroblastoma overexpressed|nephroblastoma-overexpressed gene protein homolog|protein NOV homolog	cellular communication network factor 3	https://www.ensembl.org/Homo_sapiens/Gene/ExpressionAtlas?g=ENSG00000136999	http://www.ensembl.org/id/ENSG00000136999	https://www.ncbi.nlm.nih.gov/gene?term=(CCN3[Gene Name]) AND Homo sapiens[Organism]	https://pubmed.ncbi.nlm.nih.gov/36499638 https://pubmed.ncbi.nlm.nih.gov/35682564 https://pubmed.ncbi.nlm.nih.gov/35603163 https://pubmed.ncbi.nlm.nih.gov/34940056 https://pubmed.ncbi.nlm.nih.gov/34884877 https://pubmed.ncbi.nlm.nih.gov/34828265 https://pubmed.ncbi.nlm.nih.gov/34393649 https://pubmed.ncbi.nlm.nih.gov/33946014 https://pubmed.ncbi.nlm.nih.gov/33919365 https://pubmed.ncbi.nlm.nih.go…	https://pubmed.ncbi.nlm.nih.gov/36499638 https://pubmed.ncbi.nlm.nih.gov/35682564 https://pubmed.ncbi.nlm.nih.gov/35603163 https://pubmed.ncbi.nlm.nih.gov/34940056 https://pubmed.ncbi.nlm.nih.gov/34884877 https://pubmed.ncbi.nlm.nih.gov/34828265 https://pubmed.ncbi.nlm.nih.gov/34393649 https://pubmed.ncbi.nlm.nih.gov/33946014 https://pubmed.ncbi.nlm.nih.gov/33919365 https://pubmed.ncbi.nlm.nih.go…	https://pubmed.ncbi.nlm.nih.gov/36676833 https://pubmed.ncbi.nlm.nih.gov/36670446 https://pubmed.ncbi.nlm.nih.gov/36573684 https://pubmed.ncbi.nlm.nih.gov/36529291 https://pubmed.ncbi.nlm.nih.gov/36499638 https://pubmed.ncbi.nlm.nih.gov/36370349 https://pubmed.ncbi.nlm.nih.gov/36283019 https://pubmed.ncbi.nlm.nih.gov/36240918 https://pubmed.ncbi.nlm.nih.gov/36231029 https://pubmed.ncbi.nlm.nih.go…
ENSG00000105825	TFPI2	1367.1	4.25792	2.24142e-45	1.76455e-41	Y	tissue factor pathway inhibitor 2	PP5, REF1, TFPI-2	tissue factor pathway inhibitor 2|placental protein 5|retinal pigment epithelium cell factor 1	tissue factor pathway inhibitor 2	https://www.ensembl.org/Homo_sapiens/Gene/ExpressionAtlas?g=ENSG00000105825	http://www.ensembl.org/id/ENSG00000105825	https://www.ncbi.nlm.nih.gov/gene?term=(TFPI2[Gene Name]) AND Homo sapiens[Organism]	https://pubmed.ncbi.nlm.nih.gov/36505458 https://pubmed.ncbi.nlm.nih.gov/36407083 https://pubmed.ncbi.nlm.nih.gov/36273656 https://pubmed.ncbi.nlm.nih.gov/36077333 https://pubmed.ncbi.nlm.nih.gov/35940082 https://pubmed.ncbi.nlm.nih.gov/35838333 https://pubmed.ncbi.nlm.nih.gov/35778814 https://pubmed.ncbi.nlm.nih.gov/35613543 https://pubmed.ncbi.nlm.nih.gov/35501390 https://pubmed.ncbi.nlm.nih.go…	https://pubmed.ncbi.nlm.nih.gov/36505458 https://pubmed.ncbi.nlm.nih.gov/36407083 https://pubmed.ncbi.nlm.nih.gov/36273656 https://pubmed.ncbi.nlm.nih.gov/36077333 https://pubmed.ncbi.nlm.nih.gov/35940082 https://pubmed.ncbi.nlm.nih.gov/35838333 https://pubmed.ncbi.nlm.nih.gov/35778814 https://pubmed.ncbi.nlm.nih.gov/35613543 https://pubmed.ncbi.nlm.nih.gov/35501390 https://pubmed.ncbi.nlm.nih.go…	https://pubmed.ncbi.nlm.nih.gov/36505458 https://pubmed.ncbi.nlm.nih.gov/36452157 https://pubmed.ncbi.nlm.nih.gov/36407083 https://pubmed.ncbi.nlm.nih.gov/36358701 https://pubmed.ncbi.nlm.nih.gov/36327928 https://pubmed.ncbi.nlm.nih.gov/36273656 https://pubmed.ncbi.nlm.nih.gov/36077333 https://pubmed.ncbi.nlm.nih.gov/36003650 https://pubmed.ncbi.nlm.nih.gov/35940082 https://pubmed.ncbi.nlm.nih.go…
ENSG00000073756	PTGS2	5330.93	5.00971	5.15976e-34	2.70801e-30	Y	prostaglandin-endoperoxide synthase 2	COX-2, COX2, GRIPGHS, PGG/HS, PGHS-2, PHS-2, hCox-2	prostaglandin G/H synthase 2|PGH synthase 2|PHS II|cyclooxygenase 2|cyclooxygenase 2b|prostaglandin H2 synthase 2|prostaglandin-endoperoxide synthase 2 (prostaglandin G/H synthase and cyclooxygenase)	prostaglandin-endoperoxide synthase 2	https://www.ensembl.org/Homo_sapiens/Gene/ExpressionAtlas?g=ENSG00000073756	http://www.ensembl.org/id/ENSG00000073756	https://www.ncbi.nlm.nih.gov/gene?term=(PTGS2[Gene Name]) AND Homo sapiens[Organism]	https://pubmed.ncbi.nlm.nih.gov/36677961 https://pubmed.ncbi.nlm.nih.gov/36677021 https://pubmed.ncbi.nlm.nih.gov/36671689 https://pubmed.ncbi.nlm.nih.gov/36633257 https://pubmed.ncbi.nlm.nih.gov/36626454 https://pubmed.ncbi.nlm.nih.gov/36615756 https://pubmed.ncbi.nlm.nih.gov/36615723 https://pubmed.ncbi.nlm.nih.gov/36614295 https://pubmed.ncbi.nlm.nih.gov/36613050 https://pubmed.ncbi.nlm.nih.go…	https://pubmed.ncbi.nlm.nih.gov/36677961 https://pubmed.ncbi.nlm.nih.gov/36677021 https://pubmed.ncbi.nlm.nih.gov/36671689 https://pubmed.ncbi.nlm.nih.gov/36633257 https://pubmed.ncbi.nlm.nih.gov/36626454 https://pubmed.ncbi.nlm.nih.gov/36615756 https://pubmed.ncbi.nlm.nih.gov/36615723 https://pubmed.ncbi.nlm.nih.gov/36614295 https://pubmed.ncbi.nlm.nih.gov/36613050 https://pubmed.ncbi.nlm.nih.go…	https://pubmed.ncbi.nlm.nih.gov/36678965 https://pubmed.ncbi.nlm.nih.gov/36678651 https://pubmed.ncbi.nlm.nih.gov/36678600 https://pubmed.ncbi.nlm.nih.gov/36677961 https://pubmed.ncbi.nlm.nih.gov/36677021 https://pubmed.ncbi.nlm.nih.gov/36675159 https://pubmed.ncbi.nlm.nih.gov/36675101 https://pubmed.ncbi.nlm.nih.gov/36675083 https://pubmed.ncbi.nlm.nih.gov/36673331 https://pubmed.ncbi.nlm.nih.go…
ENSG00000169851	PCDH7	323.962	-6.2395	2.07805e-33	8.17974e-30	Y	protocadherin 7	BH-Pcdh, BHPCDH, PPP1R120	protocadherin-7|BH-protocadherin (brain-heart)|brain-heart protocadherin|protein phosphatase 1, regulatory subunit 120	protocadherin 7	https://www.ensembl.org/Homo_sapiens/Gene/ExpressionAtlas?g=ENSG00000169851	http://www.ensembl.org/id/ENSG00000169851	https://www.ncbi.nlm.nih.gov/gene?term=(PCDH7[Gene Name]) AND Homo sapiens[Organism]	https://pubmed.ncbi.nlm.nih.gov/36477655 https://pubmed.ncbi.nlm.nih.gov/36016931 https://pubmed.ncbi.nlm.nih.gov/35616696 https://pubmed.ncbi.nlm.nih.gov/35321939 https://pubmed.ncbi.nlm.nih.gov/35280687 https://pubmed.ncbi.nlm.nih.gov/35132075 https://pubmed.ncbi.nlm.nih.gov/34657382 https://pubmed.ncbi.nlm.nih.gov/34580602 https://pubmed.ncbi.nlm.nih.gov/34573389 https://pubmed.ncbi.nlm.nih.go…	https://pubmed.ncbi.nlm.nih.gov/36477655 https://pubmed.ncbi.nlm.nih.gov/36016931 https://pubmed.ncbi.nlm.nih.gov/35616696 https://pubmed.ncbi.nlm.nih.gov/35321939 https://pubmed.ncbi.nlm.nih.gov/35280687 https://pubmed.ncbi.nlm.nih.gov/35132075 https://pubmed.ncbi.nlm.nih.gov/34657382 https://pubmed.ncbi.nlm.nih.gov/34580602 https://pubmed.ncbi.nlm.nih.gov/34573389 https://pubmed.ncbi.nlm.nih.go…	https://pubmed.ncbi.nlm.nih.gov/36530971 https://pubmed.ncbi.nlm.nih.gov/36477655 https://pubmed.ncbi.nlm.nih.gov/36311939 https://pubmed.ncbi.nlm.nih.gov/36092932 https://pubmed.ncbi.nlm.nih.gov/36016931 https://pubmed.ncbi.nlm.nih.gov/35926236 https://pubmed.ncbi.nlm.nih.gov/35906841 https://pubmed.ncbi.nlm.nih.gov/35820539 https://pubmed.ncbi.nlm.nih.gov/35616696 https://pubmed.ncbi.nlm.nih.go…
ENSG00000132386	SERPINF1	735.995	-5.64469	6.17743e-32	1.94527e-28	Y	serpin family F member 1	EPC-1, OI12, OI6, PEDF, PIG35	pigment epithelium-derived factor|alpha-2 antiplasmin|cell proliferation-inducing gene 35 protein|serine (or cysteine) proteinase inhibitor, clade F (alpha-2 antiplasmin, pigment epithelium derived factor), member 1|serpin peptidase inhibitor, clade F (alpha-2 antiplasmin, pigment epithelium derived factor), member 1|testis tissue sperm-binding protein Li 70n	serpin family F member 1	https://www.ensembl.org/Homo_sapiens/Gene/ExpressionAtlas?g=ENSG00000132386	http://www.ensembl.org/id/ENSG00000132386	https://www.ncbi.nlm.nih.gov/gene?term=(SERPINF1[Gene Name]) AND Homo sapiens[Organism]	https://pubmed.ncbi.nlm.nih.gov/36595851 https://pubmed.ncbi.nlm.nih.gov/36505458 https://pubmed.ncbi.nlm.nih.gov/36459524 https://pubmed.ncbi.nlm.nih.gov/36322168 https://pubmed.ncbi.nlm.nih.gov/36198922 https://pubmed.ncbi.nlm.nih.gov/35900662 https://pubmed.ncbi.nlm.nih.gov/35862273 https://pubmed.ncbi.nlm.nih.gov/35703132 https://pubmed.ncbi.nlm.nih.gov/35679518 https://pubmed.ncbi.nlm.nih.go…	https://pubmed.ncbi.nlm.nih.gov/36595851 https://pubmed.ncbi.nlm.nih.gov/36505458 https://pubmed.ncbi.nlm.nih.gov/36459524 https://pubmed.ncbi.nlm.nih.gov/36322168 https://pubmed.ncbi.nlm.nih.gov/36198922 https://pubmed.ncbi.nlm.nih.gov/35900662 https://pubmed.ncbi.nlm.nih.gov/35862273 https://pubmed.ncbi.nlm.nih.gov/35703132 https://pubmed.ncbi.nlm.nih.gov/35679518 https://pubmed.ncbi.nlm.nih.go…	https://pubmed.ncbi.nlm.nih.gov/36595851 https://pubmed.ncbi.nlm.nih.gov/36505458 https://pubmed.ncbi.nlm.nih.gov/36459524 https://pubmed.ncbi.nlm.nih.gov/36322168 https://pubmed.ncbi.nlm.nih.gov/36267740 https://pubmed.ncbi.nlm.nih.gov/36198922 https://pubmed.ncbi.nlm.nih.gov/35990977 https://pubmed.ncbi.nlm.nih.gov/35958340 https://pubmed.ncbi.nlm.nih.gov/35900662 https://pubmed.ncbi.nlm.nih.go…
ENSG00000170421	KRT8	2558.06	-3.62503	3.745e-30	9.82752e-27	Y	keratin 8	CARD2, CK-8, CK8, CYK8, K2C8, K8, KO	keratin, type II cytoskeletal 8|cytokeratin-8|keratin 8, type II|type-II keratin Kb8	keratin 8	https://www.ensembl.org/Homo_sapiens/Gene/ExpressionAtlas?g=ENSG00000170421	http://www.ensembl.org/id/ENSG00000170421	https://www.ncbi.nlm.nih.gov/gene?term=(KRT8[Gene Name]) AND Homo sapiens[Organism]	https://pubmed.ncbi.nlm.nih.gov/36552797 https://pubmed.ncbi.nlm.nih.gov/36522691 https://pubmed.ncbi.nlm.nih.gov/36375315 https://pubmed.ncbi.nlm.nih.gov/36311801 https://pubmed.ncbi.nlm.nih.gov/35958278 https://pubmed.ncbi.nlm.nih.gov/35659265 https://pubmed.ncbi.nlm.nih.gov/35637421 https://pubmed.ncbi.nlm.nih.gov/35578692 https://pubmed.ncbi.nlm.nih.gov/35559994 https://pubmed.ncbi.nlm.nih.go…	https://pubmed.ncbi.nlm.nih.gov/36552797 https://pubmed.ncbi.nlm.nih.gov/36522691 https://pubmed.ncbi.nlm.nih.gov/36375315 https://pubmed.ncbi.nlm.nih.gov/36311801 https://pubmed.ncbi.nlm.nih.gov/35958278 https://pubmed.ncbi.nlm.nih.gov/35659265 https://pubmed.ncbi.nlm.nih.gov/35637421 https://pubmed.ncbi.nlm.nih.gov/35578692 https://pubmed.ncbi.nlm.nih.gov/35559994 https://pubmed.ncbi.nlm.nih.go…	https://pubmed.ncbi.nlm.nih.gov/36671463 https://pubmed.ncbi.nlm.nih.gov/36552797 https://pubmed.ncbi.nlm.nih.gov/36522691 https://pubmed.ncbi.nlm.nih.gov/36454999 https://pubmed.ncbi.nlm.nih.gov/36428585 https://pubmed.ncbi.nlm.nih.gov/36420081 https://pubmed.ncbi.nlm.nih.gov/36375315 https://pubmed.ncbi.nlm.nih.gov/36356086 https://pubmed.ncbi.nlm.nih.gov/36311801 https://pubmed.ncbi.nlm.nih.go…
ENSG00000099937	SERPIND1	300.121	5.75673	1.88562e-28	4.24129e-25	Y	serpin family D member 1	D22S673, HC2, HCF2, HCII, HLS2, LS2, THPH10	heparin cofactor 2|leuserpin 2|protease inhibitor leuserpin-2|serine (or cysteine) proteinase inhibitor, clade D (heparin cofactor), member 1|serpin D1|serpin peptidase inhibitor, clade D (heparin cofactor), member 1	serpin family D member 1	https://www.ensembl.org/Homo_sapiens/Gene/ExpressionAtlas?g=ENSG00000099937	http://www.ensembl.org/id/ENSG00000099937	https://www.ncbi.nlm.nih.gov/gene?term=(SERPIND1[Gene Name]) AND Homo sapiens[Organism]	https://pubmed.ncbi.nlm.nih.gov/35163468 https://pubmed.ncbi.nlm.nih.gov/34469466 https://pubmed.ncbi.nlm.nih.gov/34331478 https://pubmed.ncbi.nlm.nih.gov/34214668 https://pubmed.ncbi.nlm.nih.gov/34043882 https://pubmed.ncbi.nlm.nih.gov/34015304 https://pubmed.ncbi.nlm.nih.gov/32827448 https://pubmed.ncbi.nlm.nih.gov/32596344 https://pubmed.ncbi.nlm.nih.gov/31040200 https://pubmed.ncbi.nlm.nih.go…	https://pubmed.ncbi.nlm.nih.gov/35163468 https://pubmed.ncbi.nlm.nih.gov/34469466 https://pubmed.ncbi.nlm.nih.gov/34331478 https://pubmed.ncbi.nlm.nih.gov/34214668 https://pubmed.ncbi.nlm.nih.gov/34043882 https://pubmed.ncbi.nlm.nih.gov/34015304 https://pubmed.ncbi.nlm.nih.gov/32827448 https://pubmed.ncbi.nlm.nih.gov/32596344 https://pubmed.ncbi.nlm.nih.gov/31040200 https://pubmed.ncbi.nlm.nih.go…	https://pubmed.ncbi.nlm.nih.gov/36267426 https://pubmed.ncbi.nlm.nih.gov/36246596 https://pubmed.ncbi.nlm.nih.gov/35163468 https://pubmed.ncbi.nlm.nih.gov/35155161 https://pubmed.ncbi.nlm.nih.gov/35031034 https://pubmed.ncbi.nlm.nih.gov/34469466 https://pubmed.ncbi.nlm.nih.gov/34331478 https://pubmed.ncbi.nlm.nih.gov/34305563 https://pubmed.ncbi.nlm.nih.gov/34214668 https://pubmed.ncbi.nlm.nih.go…
ENSG00000106484	MEST	249.125	-6.70237	2.44873e-27	4.81941e-24	Y	mesoderm specific transcript	PEG1	mesoderm-specific transcript homolog protein|paternally-expressed gene 1 protein	mesoderm specific transcript	https://www.ensembl.org/Homo_sapiens/Gene/ExpressionAtlas?g=ENSG00000106484	http://www.ensembl.org/id/ENSG00000106484	https://www.ncbi.nlm.nih.gov/gene?term=(MEST[Gene Name]) AND Homo sapiens[Organism]	https://pubmed.ncbi.nlm.nih.gov/36597335 https://pubmed.ncbi.nlm.nih.gov/36550451 https://pubmed.ncbi.nlm.nih.gov/36530731 https://pubmed.ncbi.nlm.nih.gov/36523468 https://pubmed.ncbi.nlm.nih.gov/36462406 https://pubmed.ncbi.nlm.nih.gov/36384494 https://pubmed.ncbi.nlm.nih.gov/36362051 https://pubmed.ncbi.nlm.nih.gov/36357889 https://pubmed.ncbi.nlm.nih.gov/36153594 https://pubmed.ncbi.nlm.nih.go…	https://pubmed.ncbi.nlm.nih.gov/36597335 https://pubmed.ncbi.nlm.nih.gov/36550451 https://pubmed.ncbi.nlm.nih.gov/36530731 https://pubmed.ncbi.nlm.nih.gov/36523468 https://pubmed.ncbi.nlm.nih.gov/36462406 https://pubmed.ncbi.nlm.nih.gov/36384494 https://pubmed.ncbi.nlm.nih.gov/36362051 https://pubmed.ncbi.nlm.nih.gov/36357889 https://pubmed.ncbi.nlm.nih.gov/36153594 https://pubmed.ncbi.nlm.nih.go…	https://pubmed.ncbi.nlm.nih.gov/36675518 https://pubmed.ncbi.nlm.nih.gov/36675135 https://pubmed.ncbi.nlm.nih.gov/36672199 https://pubmed.ncbi.nlm.nih.gov/36653930 https://pubmed.ncbi.nlm.nih.gov/36648741 https://pubmed.ncbi.nlm.nih.gov/36644654 https://pubmed.ncbi.nlm.nih.gov/36630006 https://pubmed.ncbi.nlm.nih.gov/36621216 https://pubmed.ncbi.nlm.nih.gov/36597335 https://pubmed.ncbi.nlm.nih.go…
ENSG00000100433	KCNK10	251.748	-5.02319	5.17407e-27	9.05175e-24	Y	potassium two pore domain channel subfamily K member 10	K2p10.1, PPP1R97, TREK-2, TREK2	potassium channel subfamily K member 10|2P domain potassium channel TREK2|TREK-2 K(+) channel subunit|TWIK-related K+ channel 2|outward rectifying potassium channel protein TREK-2|potassium channel TREK-2|potassium channel, subfamily K, member 10|potassium channel, two pore domain subfamily K, member 10|protein phosphatase 1, regulatory subunit 97	potassium two pore domain channel subfamily K member 10	https://www.ensembl.org/Homo_sapiens/Gene/ExpressionAtlas?g=ENSG00000100433	http://www.ensembl.org/id/ENSG00000100433	https://www.ncbi.nlm.nih.gov/gene?term=(KCNK10[Gene Name]) AND Homo sapiens[Organism]	https://pubmed.ncbi.nlm.nih.gov/34852225 https://pubmed.ncbi.nlm.nih.gov/34618865 https://pubmed.ncbi.nlm.nih.gov/34445768 https://pubmed.ncbi.nlm.nih.gov/33375888 https://pubmed.ncbi.nlm.nih.gov/32641496 https://pubmed.ncbi.nlm.nih.gov/32320829 https://pubmed.ncbi.nlm.nih.gov/32162512 https://pubmed.ncbi.nlm.nih.gov/31564414 https://pubmed.ncbi.nlm.nih.gov/31539490 https://pubmed.ncbi.nlm.nih.go…	https://pubmed.ncbi.nlm.nih.gov/34852225 https://pubmed.ncbi.nlm.nih.gov/34618865 https://pubmed.ncbi.nlm.nih.gov/34445768 https://pubmed.ncbi.nlm.nih.gov/33375888 https://pubmed.ncbi.nlm.nih.gov/32641496 https://pubmed.ncbi.nlm.nih.gov/32320829 https://pubmed.ncbi.nlm.nih.gov/32162512 https://pubmed.ncbi.nlm.nih.gov/31564414 https://pubmed.ncbi.nlm.nih.gov/31539490 https://pubmed.ncbi.nlm.nih.go…	https://pubmed.ncbi.nlm.nih.gov/35907583 https://pubmed.ncbi.nlm.nih.gov/35685361 https://pubmed.ncbi.nlm.nih.gov/34852225 https://pubmed.ncbi.nlm.nih.gov/34618865 https://pubmed.ncbi.nlm.nih.gov/34461754 https://pubmed.ncbi.nlm.nih.gov/34445768 https://pubmed.ncbi.nlm.nih.gov/33586023 https://pubmed.ncbi.nlm.nih.gov/33375888 https://pubmed.ncbi.nlm.nih.gov/32641496 https://pubmed.ncbi.nlm.nih.go…
ENSG00000113361	CDH6	1568.97	3.60562	2.18302e-24	3.43716e-21	Y	cadherin 6	CAD6, KCAD	cadherin-6|cadherin 6, type 2, K-cadherin (fetal kidney)	cadherin 6	https://www.ensembl.org/Homo_sapiens/Gene/ExpressionAtlas?g=ENSG00000113361	http://www.ensembl.org/id/ENSG00000113361	https://www.ncbi.nlm.nih.gov/gene?term=(CDH6[Gene Name]) AND Homo sapiens[Organism]	https://pubmed.ncbi.nlm.nih.gov/36352274 https://pubmed.ncbi.nlm.nih.gov/35982059 https://pubmed.ncbi.nlm.nih.gov/35523311 https://pubmed.ncbi.nlm.nih.gov/35378004 https://pubmed.ncbi.nlm.nih.gov/34880371 https://pubmed.ncbi.nlm.nih.gov/34515215 https://pubmed.ncbi.nlm.nih.gov/34332599 https://pubmed.ncbi.nlm.nih.gov/34281542 https://pubmed.ncbi.nlm.nih.gov/33715292 https://pubmed.ncbi.nlm.nih.go…	https://pubmed.ncbi.nlm.nih.gov/36352274 https://pubmed.ncbi.nlm.nih.gov/35982059 https://pubmed.ncbi.nlm.nih.gov/35523311 https://pubmed.ncbi.nlm.nih.gov/35378004 https://pubmed.ncbi.nlm.nih.gov/34880371 https://pubmed.ncbi.nlm.nih.gov/34515215 https://pubmed.ncbi.nlm.nih.gov/34332599 https://pubmed.ncbi.nlm.nih.gov/34281542 https://pubmed.ncbi.nlm.nih.gov/33715292 https://pubmed.ncbi.nlm.nih.go…	https://pubmed.ncbi.nlm.nih.gov/36628224 https://pubmed.ncbi.nlm.nih.gov/36507940 https://pubmed.ncbi.nlm.nih.gov/36352274 https://pubmed.ncbi.nlm.nih.gov/35982059 https://pubmed.ncbi.nlm.nih.gov/35938030 https://pubmed.ncbi.nlm.nih.gov/35523311 https://pubmed.ncbi.nlm.nih.gov/35378004 https://pubmed.ncbi.nlm.nih.gov/35356283 https://pubmed.ncbi.nlm.nih.gov/34883395 https://pubmed.ncbi.nlm.nih.go…
ENSG00000272068	AL365181.2	216.429	-4.11282	8.48142e-24	1.214e-20	Y					https://www.ensembl.org/Homo_sapiens/Gene/ExpressionAtlas?g=ENSG00000272068	http://www.ensembl.org/id/ENSG00000272068	https://www.ncbi.nlm.nih.gov/gene?term=(AL365181.2[Gene Name]) AND Homo sapiens[Organism]	https://pubmed.ncbi.nlm.nih.gov/33739047	https://pubmed.ncbi.nlm.nih.gov/33739047	https://pubmed.ncbi.nlm.nih.gov/34306024 https://pubmed.ncbi.nlm.nih.gov/33739047
ENSG00000145287	PLAC8	188.217	-5.5853	1.43276e-23	1.87991e-20	Y	galectin 13	GAL13, PLAC8, PP13	galactoside-binding soluble lectin 13|beta-galactoside-binding lectin|gal-13|lectin, galactoside-binding, soluble, 13|placental protein 13|placental tissue protein 13	galectin 13	https://www.ensembl.org/Homo_sapiens/Gene/ExpressionAtlas?g=ENSG00000145287	http://www.ensembl.org/id/ENSG00000145287	https://www.ncbi.nlm.nih.gov/gene?term=(PLAC8[Gene Name]) AND Homo sapiens[Organism]	https://pubmed.ncbi.nlm.nih.gov/36653401 https://pubmed.ncbi.nlm.nih.gov/36576616 https://pubmed.ncbi.nlm.nih.gov/36543379 https://pubmed.ncbi.nlm.nih.gov/36424471 https://pubmed.ncbi.nlm.nih.gov/36124427 https://pubmed.ncbi.nlm.nih.gov/36090971 https://pubmed.ncbi.nlm.nih.gov/35497881 https://pubmed.ncbi.nlm.nih.gov/35279480 https://pubmed.ncbi.nlm.nih.gov/34975294 https://pubmed.ncbi.nlm.nih.go…	https://pubmed.ncbi.nlm.nih.gov/36653401 https://pubmed.ncbi.nlm.nih.gov/36576616 https://pubmed.ncbi.nlm.nih.gov/36543379 https://pubmed.ncbi.nlm.nih.gov/36424471 https://pubmed.ncbi.nlm.nih.gov/36124427 https://pubmed.ncbi.nlm.nih.gov/36090971 https://pubmed.ncbi.nlm.nih.gov/35497881 https://pubmed.ncbi.nlm.nih.gov/35279480 https://pubmed.ncbi.nlm.nih.gov/34975294 https://pubmed.ncbi.nlm.nih.go…	https://pubmed.ncbi.nlm.nih.gov/36653401 https://pubmed.ncbi.nlm.nih.gov/36602585 https://pubmed.ncbi.nlm.nih.gov/36576616 https://pubmed.ncbi.nlm.nih.gov/36545982 https://pubmed.ncbi.nlm.nih.gov/36543379 https://pubmed.ncbi.nlm.nih.gov/36424471 https://pubmed.ncbi.nlm.nih.gov/36422814 https://pubmed.ncbi.nlm.nih.gov/36124427 https://pubmed.ncbi.nlm.nih.gov/36090971 https://pubmed.ncbi.nlm.nih.go…
ENSG00000129422	MTUS1	381.428	-3.49537	1.17932e-22	1.42833e-19	Y	microtubule associated scaffold protein 1	ATBP, ATIP, ATIP3, ICIS, MP44, MTSG1	microtubule-associated tumor suppressor 1|AT2 receptor-binding protein|AT2 receptor-interacting protein|AT2R binding protein|angiotensin-II type 2 receptor-interacting protein|erythroid differentiation-related|microtubule associated tumor suppressor 1|mitochondrial tumor suppressor gene 1|transcription factor MTSG1	microtubule associated scaffold protein 1	https://www.ensembl.org/Homo_sapiens/Gene/ExpressionAtlas?g=ENSG00000129422	http://www.ensembl.org/id/ENSG00000129422	https://www.ncbi.nlm.nih.gov/gene?term=(MTUS1[Gene Name]) AND Homo sapiens[Organism]	https://pubmed.ncbi.nlm.nih.gov/35962436 https://pubmed.ncbi.nlm.nih.gov/35709926 https://pubmed.ncbi.nlm.nih.gov/35448980 https://pubmed.ncbi.nlm.nih.gov/34980126 https://pubmed.ncbi.nlm.nih.gov/34747541 https://pubmed.ncbi.nlm.nih.gov/34125870 https://pubmed.ncbi.nlm.nih.gov/34062782 https://pubmed.ncbi.nlm.nih.gov/33355363 https://pubmed.ncbi.nlm.nih.gov/33311452 https://pubmed.ncbi.nlm.nih.go…	https://pubmed.ncbi.nlm.nih.gov/35962436 https://pubmed.ncbi.nlm.nih.gov/35709926 https://pubmed.ncbi.nlm.nih.gov/35448980 https://pubmed.ncbi.nlm.nih.gov/34980126 https://pubmed.ncbi.nlm.nih.gov/34747541 https://pubmed.ncbi.nlm.nih.gov/34125870 https://pubmed.ncbi.nlm.nih.gov/34062782 https://pubmed.ncbi.nlm.nih.gov/33355363 https://pubmed.ncbi.nlm.nih.gov/33311452 https://pubmed.ncbi.nlm.nih.go…	https://pubmed.ncbi.nlm.nih.gov/36230283 https://pubmed.ncbi.nlm.nih.gov/35962436 https://pubmed.ncbi.nlm.nih.gov/35709926 https://pubmed.ncbi.nlm.nih.gov/35448980 https://pubmed.ncbi.nlm.nih.gov/35079800 https://pubmed.ncbi.nlm.nih.gov/34980126 https://pubmed.ncbi.nlm.nih.gov/34750363 https://pubmed.ncbi.nlm.nih.gov/34747541 https://pubmed.ncbi.nlm.nih.gov/34359333 https://pubmed.ncbi.nlm.nih.go…
ENSG00000171388	APLN	576.702	-4.55121	3.43109e-22	3.85876e-19	Y	apelin	APEL, XNPEP2	apelin|AGTRL1 ligand|APJ endogenous ligand	apelin	https://www.ensembl.org/Homo_sapiens/Gene/ExpressionAtlas?g=ENSG00000171388	http://www.ensembl.org/id/ENSG00000171388	https://www.ncbi.nlm.nih.gov/gene?term=(APLN[Gene Name]) AND Homo sapiens[Organism]	https://pubmed.ncbi.nlm.nih.gov/36632453 https://pubmed.ncbi.nlm.nih.gov/36614283 https://pubmed.ncbi.nlm.nih.gov/36588538 https://pubmed.ncbi.nlm.nih.gov/36513190 https://pubmed.ncbi.nlm.nih.gov/36472288 https://pubmed.ncbi.nlm.nih.gov/36443325 https://pubmed.ncbi.nlm.nih.gov/36206383 https://pubmed.ncbi.nlm.nih.gov/36193059 https://pubmed.ncbi.nlm.nih.gov/36152345 https://pubmed.ncbi.nlm.nih.go…	https://pubmed.ncbi.nlm.nih.gov/36632453 https://pubmed.ncbi.nlm.nih.gov/36614283 https://pubmed.ncbi.nlm.nih.gov/36588538 https://pubmed.ncbi.nlm.nih.gov/36513190 https://pubmed.ncbi.nlm.nih.gov/36472288 https://pubmed.ncbi.nlm.nih.gov/36443325 https://pubmed.ncbi.nlm.nih.gov/36206383 https://pubmed.ncbi.nlm.nih.gov/36193059 https://pubmed.ncbi.nlm.nih.gov/36152345 https://pubmed.ncbi.nlm.nih.go…	https://pubmed.ncbi.nlm.nih.gov/36672132 https://pubmed.ncbi.nlm.nih.gov/36657657 https://pubmed.ncbi.nlm.nih.gov/36632453 https://pubmed.ncbi.nlm.nih.gov/36614283 https://pubmed.ncbi.nlm.nih.gov/36611783 https://pubmed.ncbi.nlm.nih.gov/36588538 https://pubmed.ncbi.nlm.nih.gov/36513190 https://pubmed.ncbi.nlm.nih.gov/36499009 https://pubmed.ncbi.nlm.nih.gov/36472288 https://pubmed.ncbi.nlm.nih.go…
ENSG00000134668	SPOCD1	831.806	2.92534	2.96908e-21	3.11654e-18	Y	SPOC domain containing 1	PPP1R146	SPOC domain-containing protein 1|protein phosphatase 1, regulatory subunit 146	SPOC domain containing 1	https://www.ensembl.org/Homo_sapiens/Gene/ExpressionAtlas?g=ENSG00000134668	http://www.ensembl.org/id/ENSG00000134668	https://www.ncbi.nlm.nih.gov/gene?term=(SPOCD1[Gene Name]) AND Homo sapiens[Organism]	https://pubmed.ncbi.nlm.nih.gov/36619695 https://pubmed.ncbi.nlm.nih.gov/35504398 https://pubmed.ncbi.nlm.nih.gov/35259044 https://pubmed.ncbi.nlm.nih.gov/33726799 https://pubmed.ncbi.nlm.nih.gov/33443570 https://pubmed.ncbi.nlm.nih.gov/29257309 https://pubmed.ncbi.nlm.nih.gov/29240458 https://pubmed.ncbi.nlm.nih.gov/28246015 https://pubmed.ncbi.nlm.nih.gov/27414486	https://pubmed.ncbi.nlm.nih.gov/36619695 https://pubmed.ncbi.nlm.nih.gov/35504398 https://pubmed.ncbi.nlm.nih.gov/35259044 https://pubmed.ncbi.nlm.nih.gov/33726799 https://pubmed.ncbi.nlm.nih.gov/33443570 https://pubmed.ncbi.nlm.nih.gov/29257309 https://pubmed.ncbi.nlm.nih.gov/29240458 https://pubmed.ncbi.nlm.nih.gov/28246015 https://pubmed.ncbi.nlm.nih.gov/27414486	https://pubmed.ncbi.nlm.nih.gov/36619695 https://pubmed.ncbi.nlm.nih.gov/35720126 https://pubmed.ncbi.nlm.nih.gov/35646092 https://pubmed.ncbi.nlm.nih.gov/35504398 https://pubmed.ncbi.nlm.nih.gov/35267472 https://pubmed.ncbi.nlm.nih.gov/35259044 https://pubmed.ncbi.nlm.nih.gov/33726799 https://pubmed.ncbi.nlm.nih.gov/33443570 https://pubmed.ncbi.nlm.nih.gov/32674113 https://pubmed.ncbi.nlm.nih.go…
ENSG00000137868	STRA6	325.665	-3.26151	8.44221e-21	8.30766e-18	Y	signaling receptor and transporter of retinol STRA6	MCOPCB8, MCOPS9, PP14296	receptor for retinol uptake STRA6|RBP receptor|retinol binding protein 4 receptor|retinol-binding protein receptor STRA6|stimulated by retinoic acid 6 homolog|stimulated by retinoic acid gene 6 homolog|stimulated by retinoic acid gene 6 protein homolog	signaling receptor and transporter of retinol STRA6	https://www.ensembl.org/Homo_sapiens/Gene/ExpressionAtlas?g=ENSG00000137868	http://www.ensembl.org/id/ENSG00000137868	https://www.ncbi.nlm.nih.gov/gene?term=(STRA6[Gene Name]) AND Homo sapiens[Organism]	https://pubmed.ncbi.nlm.nih.gov/36635482 https://pubmed.ncbi.nlm.nih.gov/35874675 https://pubmed.ncbi.nlm.nih.gov/35790350 https://pubmed.ncbi.nlm.nih.gov/35656886 https://pubmed.ncbi.nlm.nih.gov/35334893 https://pubmed.ncbi.nlm.nih.gov/35181035 https://pubmed.ncbi.nlm.nih.gov/34954205 https://pubmed.ncbi.nlm.nih.gov/34836244 https://pubmed.ncbi.nlm.nih.gov/34592217 https://pubmed.ncbi.nlm.nih.go…	https://pubmed.ncbi.nlm.nih.gov/36635482 https://pubmed.ncbi.nlm.nih.gov/35874675 https://pubmed.ncbi.nlm.nih.gov/35790350 https://pubmed.ncbi.nlm.nih.gov/35656886 https://pubmed.ncbi.nlm.nih.gov/35334893 https://pubmed.ncbi.nlm.nih.gov/35181035 https://pubmed.ncbi.nlm.nih.gov/34954205 https://pubmed.ncbi.nlm.nih.gov/34836244 https://pubmed.ncbi.nlm.nih.gov/34592217 https://pubmed.ncbi.nlm.nih.go…	https://pubmed.ncbi.nlm.nih.gov/36635482 https://pubmed.ncbi.nlm.nih.gov/36592123 https://pubmed.ncbi.nlm.nih.gov/36435294 https://pubmed.ncbi.nlm.nih.gov/36150025 https://pubmed.ncbi.nlm.nih.gov/36008016 https://pubmed.ncbi.nlm.nih.gov/35878718 https://pubmed.ncbi.nlm.nih.gov/35874675 https://pubmed.ncbi.nlm.nih.gov/35790350 https://pubmed.ncbi.nlm.nih.gov/35745101 https://pubmed.ncbi.nlm.nih.go…
ENSG00000102760	RGCC	145.48	-4.74355	1.03218e-19	9.55977e-17	Y	regulator of cell cycle	C13orf15, RGC-32, RGC32, bA157L14.2	regulator of cell cycle RGCC|response gene to complement 32 protein	regulator of cell cycle	https://www.ensembl.org/Homo_sapiens/Gene/ExpressionAtlas?g=ENSG00000102760	http://www.ensembl.org/id/ENSG00000102760	https://www.ncbi.nlm.nih.gov/gene?term=(RGCC[Gene Name]) AND Homo sapiens[Organism]	https://pubmed.ncbi.nlm.nih.gov/36454539 https://pubmed.ncbi.nlm.nih.gov/36219944 https://pubmed.ncbi.nlm.nih.gov/36172382 https://pubmed.ncbi.nlm.nih.gov/36123690 https://pubmed.ncbi.nlm.nih.gov/36074022 https://pubmed.ncbi.nlm.nih.gov/35974102 https://pubmed.ncbi.nlm.nih.gov/35780728 https://pubmed.ncbi.nlm.nih.gov/35679756 https://pubmed.ncbi.nlm.nih.gov/35595165 https://pubmed.ncbi.nlm.nih.go…	https://pubmed.ncbi.nlm.nih.gov/36454539 https://pubmed.ncbi.nlm.nih.gov/36219944 https://pubmed.ncbi.nlm.nih.gov/36172382 https://pubmed.ncbi.nlm.nih.gov/36123690 https://pubmed.ncbi.nlm.nih.gov/36074022 https://pubmed.ncbi.nlm.nih.gov/35974102 https://pubmed.ncbi.nlm.nih.gov/35780728 https://pubmed.ncbi.nlm.nih.gov/35679756 https://pubmed.ncbi.nlm.nih.gov/35595165 https://pubmed.ncbi.nlm.nih.go…	https://pubmed.ncbi.nlm.nih.gov/36454539 https://pubmed.ncbi.nlm.nih.gov/36442404 https://pubmed.ncbi.nlm.nih.gov/36219944 https://pubmed.ncbi.nlm.nih.gov/36172382 https://pubmed.ncbi.nlm.nih.gov/36123690 https://pubmed.ncbi.nlm.nih.gov/36074022 https://pubmed.ncbi.nlm.nih.gov/35974102 https://pubmed.ncbi.nlm.nih.gov/35780728 https://pubmed.ncbi.nlm.nih.gov/35764624 https://pubmed.ncbi.nlm.nih.go…
ENSG00000155792	DEPTOR	172.122	-4.97288	1.45826e-19	1.27036e-16	Y	DEP domain containing MTOR interacting protein	DEP.6, DEPDC6	DEP domain-containing mTOR-interacting protein|DEP domain containing 6|DEP domain-containing protein 6	DEP domain containing MTOR interacting protein	https://www.ensembl.org/Homo_sapiens/Gene/ExpressionAtlas?g=ENSG00000155792	http://www.ensembl.org/id/ENSG00000155792	https://www.ncbi.nlm.nih.gov/gene?term=(DEPTOR[Gene Name]) AND Homo sapiens[Organism]	https://pubmed.ncbi.nlm.nih.gov/36413936 https://pubmed.ncbi.nlm.nih.gov/36377013 https://pubmed.ncbi.nlm.nih.gov/36012680 https://pubmed.ncbi.nlm.nih.gov/35923131 https://pubmed.ncbi.nlm.nih.gov/35457010 https://pubmed.ncbi.nlm.nih.gov/35295989 https://pubmed.ncbi.nlm.nih.gov/35216969 https://pubmed.ncbi.nlm.nih.gov/35095893 https://pubmed.ncbi.nlm.nih.gov/35078427 https://pubmed.ncbi.nlm.nih.go…	https://pubmed.ncbi.nlm.nih.gov/36413936 https://pubmed.ncbi.nlm.nih.gov/36377013 https://pubmed.ncbi.nlm.nih.gov/36012680 https://pubmed.ncbi.nlm.nih.gov/35923131 https://pubmed.ncbi.nlm.nih.gov/35457010 https://pubmed.ncbi.nlm.nih.gov/35295989 https://pubmed.ncbi.nlm.nih.gov/35216969 https://pubmed.ncbi.nlm.nih.gov/35095893 https://pubmed.ncbi.nlm.nih.gov/35078427 https://pubmed.ncbi.nlm.nih.go…	https://pubmed.ncbi.nlm.nih.gov/36571662 https://pubmed.ncbi.nlm.nih.gov/36569931 https://pubmed.ncbi.nlm.nih.gov/36548081 https://pubmed.ncbi.nlm.nih.gov/36543126 https://pubmed.ncbi.nlm.nih.gov/36535626 https://pubmed.ncbi.nlm.nih.gov/36413936 https://pubmed.ncbi.nlm.nih.gov/36388131 https://pubmed.ncbi.nlm.nih.gov/36377013 https://pubmed.ncbi.nlm.nih.gov/36090478 https://pubmed.ncbi.nlm.nih.go…
ENSG00000198542	ITGBL1	279.389	-3.27207	1.53298e-19	1.27036e-16	Y	integrin subunit beta like 1	OSCP, TIED	integrin beta-like protein 1|integrin beta like 1|integrin, beta-like 1 (with EGF-like repeat domains)|osteoblast-specific cysteine-rich protein|ten integrin EGF-like repeat domain-containing protein	integrin subunit beta like 1	https://www.ensembl.org/Homo_sapiens/Gene/ExpressionAtlas?g=ENSG00000198542	http://www.ensembl.org/id/ENSG00000198542	https://www.ncbi.nlm.nih.gov/gene?term=(ITGBL1[Gene Name]) AND Homo sapiens[Organism]	https://pubmed.ncbi.nlm.nih.gov/36046013 https://pubmed.ncbi.nlm.nih.gov/35596183 https://pubmed.ncbi.nlm.nih.gov/35584452 https://pubmed.ncbi.nlm.nih.gov/35508649 https://pubmed.ncbi.nlm.nih.gov/35066808 https://pubmed.ncbi.nlm.nih.gov/34409913 https://pubmed.ncbi.nlm.nih.gov/33049688 https://pubmed.ncbi.nlm.nih.gov/32537856 https://pubmed.ncbi.nlm.nih.gov/32278794 https://pubmed.ncbi.nlm.nih.go…	https://pubmed.ncbi.nlm.nih.gov/36046013 https://pubmed.ncbi.nlm.nih.gov/35596183 https://pubmed.ncbi.nlm.nih.gov/35584452 https://pubmed.ncbi.nlm.nih.gov/35508649 https://pubmed.ncbi.nlm.nih.gov/35066808 https://pubmed.ncbi.nlm.nih.gov/34409913 https://pubmed.ncbi.nlm.nih.gov/33049688 https://pubmed.ncbi.nlm.nih.gov/32537856 https://pubmed.ncbi.nlm.nih.gov/32278794 https://pubmed.ncbi.nlm.nih.go…	https://pubmed.ncbi.nlm.nih.gov/36503447 https://pubmed.ncbi.nlm.nih.gov/36207621 https://pubmed.ncbi.nlm.nih.gov/36183845 https://pubmed.ncbi.nlm.nih.gov/36068607 https://pubmed.ncbi.nlm.nih.gov/36046013 https://pubmed.ncbi.nlm.nih.gov/36003513 https://pubmed.ncbi.nlm.nih.gov/35873482 https://pubmed.ncbi.nlm.nih.gov/35733144 https://pubmed.ncbi.nlm.nih.gov/35596183 https://pubmed.ncbi.nlm.nih.go…
ENSG00000049323	LTBP1	2417.07	2.51659	5.34232e-19	4.20574e-16	Y	latent transforming growth factor beta binding protein 1	ARCL2E	latent-transforming growth factor beta-binding protein 1|LTBP-1|TGF-beta1-BP-1|transforming growth factor beta-1-binding protein 1	latent transforming growth factor beta binding protein 1	https://www.ensembl.org/Homo_sapiens/Gene/ExpressionAtlas?g=ENSG00000049323	http://www.ensembl.org/id/ENSG00000049323	https://www.ncbi.nlm.nih.gov/gene?term=(LTBP1[Gene Name]) AND Homo sapiens[Organism]	https://pubmed.ncbi.nlm.nih.gov/36629522 https://pubmed.ncbi.nlm.nih.gov/36134447 https://pubmed.ncbi.nlm.nih.gov/35452817 https://pubmed.ncbi.nlm.nih.gov/35413103 https://pubmed.ncbi.nlm.nih.gov/35098309 https://pubmed.ncbi.nlm.nih.gov/35076816 https://pubmed.ncbi.nlm.nih.gov/34941039 https://pubmed.ncbi.nlm.nih.gov/34632546 https://pubmed.ncbi.nlm.nih.gov/34418460 https://pubmed.ncbi.nlm.nih.go…	https://pubmed.ncbi.nlm.nih.gov/36629522 https://pubmed.ncbi.nlm.nih.gov/36134447 https://pubmed.ncbi.nlm.nih.gov/35452817 https://pubmed.ncbi.nlm.nih.gov/35413103 https://pubmed.ncbi.nlm.nih.gov/35098309 https://pubmed.ncbi.nlm.nih.gov/35076816 https://pubmed.ncbi.nlm.nih.gov/34941039 https://pubmed.ncbi.nlm.nih.gov/34632546 https://pubmed.ncbi.nlm.nih.gov/34418460 https://pubmed.ncbi.nlm.nih.go…	https://pubmed.ncbi.nlm.nih.gov/36629522 https://pubmed.ncbi.nlm.nih.gov/36620585 https://pubmed.ncbi.nlm.nih.gov/36443886 https://pubmed.ncbi.nlm.nih.gov/36368447 https://pubmed.ncbi.nlm.nih.gov/36356085 https://pubmed.ncbi.nlm.nih.gov/36134447 https://pubmed.ncbi.nlm.nih.gov/36124685 https://pubmed.ncbi.nlm.nih.gov/35966504 https://pubmed.ncbi.nlm.nih.gov/35933071 https://pubmed.ncbi.nlm.nih.go…
ENSG00000272405	AL365181.3	658.437	-2.7485	7.04637e-19	5.18954e-16	Y					https://www.ensembl.org/Homo_sapiens/Gene/ExpressionAtlas?g=ENSG00000272405	http://www.ensembl.org/id/ENSG00000272405	https://www.ncbi.nlm.nih.gov/gene?term=(AL365181.3[Gene Name]) AND Homo sapiens[Organism]			https://pubmed.ncbi.nlm.nih.gov/36419832 https://pubmed.ncbi.nlm.nih.gov/35242169
ENSG00000166923	GREM1	1677.11	2.73218	7.25118e-19	5.18954e-16	Y	gremlin 1, DAN family BMP antagonist	C15DUPq, CKTSF1B1, CRAC1, CRCS4, DAND2, DRM, DUP15q, GREMLIN, HMPS, HMPS1, IHG-2, MPSH, PIG2	gremlin-1|DAN domain family member 2|cell proliferation-inducing gene 2 protein|colorectal adenoma and carcinoma 1|cysteine knot superfamily 1, BMP antagonist 1|down-regulated in Mos-transformed cells protein|gremlin 1, cysteine knot superfamily, homolog|gremlin 1-like protein|hereditary mixed polyposis syndrome|increased in high glucose-2	gremlin 1, DAN family BMP antagonist	https://www.ensembl.org/Homo_sapiens/Gene/ExpressionAtlas?g=ENSG00000166923	http://www.ensembl.org/id/ENSG00000166923	https://www.ncbi.nlm.nih.gov/gene?term=(GREM1[Gene Name]) AND Homo sapiens[Organism]	https://pubmed.ncbi.nlm.nih.gov/36499658 https://pubmed.ncbi.nlm.nih.gov/36443839 https://pubmed.ncbi.nlm.nih.gov/36167601 https://pubmed.ncbi.nlm.nih.gov/35995996 https://pubmed.ncbi.nlm.nih.gov/35893034 https://pubmed.ncbi.nlm.nih.gov/35883579 https://pubmed.ncbi.nlm.nih.gov/35874760 https://pubmed.ncbi.nlm.nih.gov/35812248 https://pubmed.ncbi.nlm.nih.gov/35801926 https://pubmed.ncbi.nlm.nih.go…	https://pubmed.ncbi.nlm.nih.gov/36499658 https://pubmed.ncbi.nlm.nih.gov/36443839 https://pubmed.ncbi.nlm.nih.gov/36167601 https://pubmed.ncbi.nlm.nih.gov/35995996 https://pubmed.ncbi.nlm.nih.gov/35893034 https://pubmed.ncbi.nlm.nih.gov/35883579 https://pubmed.ncbi.nlm.nih.gov/35874760 https://pubmed.ncbi.nlm.nih.gov/35812248 https://pubmed.ncbi.nlm.nih.gov/35801926 https://pubmed.ncbi.nlm.nih.go…	https://pubmed.ncbi.nlm.nih.gov/36660690 https://pubmed.ncbi.nlm.nih.gov/36657129 https://pubmed.ncbi.nlm.nih.gov/36617688 https://pubmed.ncbi.nlm.nih.gov/36613635 https://pubmed.ncbi.nlm.nih.gov/36568849 https://pubmed.ncbi.nlm.nih.gov/36522717 https://pubmed.ncbi.nlm.nih.gov/36499658 https://pubmed.ncbi.nlm.nih.gov/36460960 https://pubmed.ncbi.nlm.nih.gov/36443839 https://pubmed.ncbi.nlm.nih.go…
ENSG00000116711	PLA2G4A	1106.65	2.47857	1.11255e-18	7.61612e-16	Y	phospholipase A2 group IVA	GURDP, PLA2G4, cPLA2, cPLA2-alpha	cytosolic phospholipase A2|calcium-dependent phospholipid-binding protein|lysophospholipase|phosphatidylcholine 2-acylhydrolase|phospholipase A2, group IVA (cytosolic, calcium-dependent)	phospholipase A2 group IVA	https://www.ensembl.org/Homo_sapiens/Gene/ExpressionAtlas?g=ENSG00000116711	http://www.ensembl.org/id/ENSG00000116711	https://www.ncbi.nlm.nih.gov/gene?term=(PLA2G4A[Gene Name]) AND Homo sapiens[Organism]	https://pubmed.ncbi.nlm.nih.gov/36555340 https://pubmed.ncbi.nlm.nih.gov/36210820 https://pubmed.ncbi.nlm.nih.gov/36076294 https://pubmed.ncbi.nlm.nih.gov/36046688 https://pubmed.ncbi.nlm.nih.gov/35930749 https://pubmed.ncbi.nlm.nih.gov/35705959 https://pubmed.ncbi.nlm.nih.gov/35395274 https://pubmed.ncbi.nlm.nih.gov/35275899 https://pubmed.ncbi.nlm.nih.gov/35254825 https://pubmed.ncbi.nlm.nih.go…	https://pubmed.ncbi.nlm.nih.gov/36555340 https://pubmed.ncbi.nlm.nih.gov/36210820 https://pubmed.ncbi.nlm.nih.gov/36076294 https://pubmed.ncbi.nlm.nih.gov/36046688 https://pubmed.ncbi.nlm.nih.gov/35930749 https://pubmed.ncbi.nlm.nih.gov/35705959 https://pubmed.ncbi.nlm.nih.gov/35395274 https://pubmed.ncbi.nlm.nih.gov/35275899 https://pubmed.ncbi.nlm.nih.gov/35254825 https://pubmed.ncbi.nlm.nih.go…	https://pubmed.ncbi.nlm.nih.gov/36653292 https://pubmed.ncbi.nlm.nih.gov/36623677 https://pubmed.ncbi.nlm.nih.gov/36609266 https://pubmed.ncbi.nlm.nih.gov/36555340 https://pubmed.ncbi.nlm.nih.gov/36480694 https://pubmed.ncbi.nlm.nih.gov/36387403 https://pubmed.ncbi.nlm.nih.gov/36338749 https://pubmed.ncbi.nlm.nih.gov/36210820 https://pubmed.ncbi.nlm.nih.gov/36142758 https://pubmed.ncbi.nlm.nih.go…
ENSG00000104081	BMF	1625.9	-2.80992	1.35449e-18	8.88602e-16	Y	Bcl2 modifying factor		bcl-2-modifying factor	Bcl2 modifying factor	https://www.ensembl.org/Homo_sapiens/Gene/ExpressionAtlas?g=ENSG00000104081	http://www.ensembl.org/id/ENSG00000104081	https://www.ncbi.nlm.nih.gov/gene?term=(BMF[Gene Name]) AND Homo sapiens[Organism]	https://pubmed.ncbi.nlm.nih.gov/36535969 https://pubmed.ncbi.nlm.nih.gov/36498862 https://pubmed.ncbi.nlm.nih.gov/36485157 https://pubmed.ncbi.nlm.nih.gov/36471036 https://pubmed.ncbi.nlm.nih.gov/36343387 https://pubmed.ncbi.nlm.nih.gov/36300789 https://pubmed.ncbi.nlm.nih.gov/36296941 https://pubmed.ncbi.nlm.nih.gov/36273157 https://pubmed.ncbi.nlm.nih.gov/36272527 https://pubmed.ncbi.nlm.nih.go…	https://pubmed.ncbi.nlm.nih.gov/36535969 https://pubmed.ncbi.nlm.nih.gov/36498862 https://pubmed.ncbi.nlm.nih.gov/36485157 https://pubmed.ncbi.nlm.nih.gov/36471036 https://pubmed.ncbi.nlm.nih.gov/36343387 https://pubmed.ncbi.nlm.nih.gov/36300789 https://pubmed.ncbi.nlm.nih.gov/36296941 https://pubmed.ncbi.nlm.nih.gov/36273157 https://pubmed.ncbi.nlm.nih.gov/36272527 https://pubmed.ncbi.nlm.nih.go…	https://pubmed.ncbi.nlm.nih.gov/36677611 https://pubmed.ncbi.nlm.nih.gov/20301779 https://pubmed.ncbi.nlm.nih.gov/36613843 https://pubmed.ncbi.nlm.nih.gov/36558121 https://pubmed.ncbi.nlm.nih.gov/36542832 https://pubmed.ncbi.nlm.nih.gov/36535969 https://pubmed.ncbi.nlm.nih.gov/36498862 https://pubmed.ncbi.nlm.nih.gov/36485157 https://pubmed.ncbi.nlm.nih.gov/36471036 https://pubmed.ncbi.nlm.nih.go…
ENSG00000103888	CEMIP	4752.54	3.43559	3.80636e-18	2.39724e-15	Y	cell migration inducing hyaluronidase 1	CCSP1, HYBID, KIAA1199, TMEM2L	cell migration-inducing and hyaluronan-binding protein|cell migration inducing hyaluronan binding protein|cell migration inducing protein, hyaluronan binding|colon cancer secreted protein 1|hyaluronan-binding protein involved in hyaluronan depolymerization	cell migration inducing hyaluronidase 1	https://www.ensembl.org/Homo_sapiens/Gene/ExpressionAtlas?g=ENSG00000103888	http://www.ensembl.org/id/ENSG00000103888	https://www.ncbi.nlm.nih.gov/gene?term=(CEMIP[Gene Name]) AND Homo sapiens[Organism]	https://pubmed.ncbi.nlm.nih.gov/36639658 https://pubmed.ncbi.nlm.nih.gov/36596591 https://pubmed.ncbi.nlm.nih.gov/36576616 https://pubmed.ncbi.nlm.nih.gov/36514216 https://pubmed.ncbi.nlm.nih.gov/36451490 https://pubmed.ncbi.nlm.nih.gov/36419650 https://pubmed.ncbi.nlm.nih.gov/36395406 https://pubmed.ncbi.nlm.nih.gov/36383109 https://pubmed.ncbi.nlm.nih.gov/36241903 https://pubmed.ncbi.nlm.nih.go…	https://pubmed.ncbi.nlm.nih.gov/36639658 https://pubmed.ncbi.nlm.nih.gov/36596591 https://pubmed.ncbi.nlm.nih.gov/36576616 https://pubmed.ncbi.nlm.nih.gov/36514216 https://pubmed.ncbi.nlm.nih.gov/36451490 https://pubmed.ncbi.nlm.nih.gov/36419650 https://pubmed.ncbi.nlm.nih.gov/36395406 https://pubmed.ncbi.nlm.nih.gov/36383109 https://pubmed.ncbi.nlm.nih.gov/36241903 https://pubmed.ncbi.nlm.nih.go…	https://pubmed.ncbi.nlm.nih.gov/36639658 https://pubmed.ncbi.nlm.nih.gov/36631437 https://pubmed.ncbi.nlm.nih.gov/36607478 https://pubmed.ncbi.nlm.nih.gov/36596591 https://pubmed.ncbi.nlm.nih.gov/36576616 https://pubmed.ncbi.nlm.nih.gov/36514216 https://pubmed.ncbi.nlm.nih.gov/36451490 https://pubmed.ncbi.nlm.nih.gov/36419650 https://pubmed.ncbi.nlm.nih.gov/36395406 https://pubmed.ncbi.nlm.nih.go…
ENSG00000010438	PRSS3	321.914	3.41521	4.15041e-18	2.51339e-15	Y	serine protease 3	MTG, PRSS4, T9, TRY3, TRY4	trypsin-3|brain trypsinogen|mesotrypsin|mesotrypsinogen|pancreatic trypsinogen III|protease, serine 3|protease, serine, 4 (trypsin 4, brain)|trypsin III|trypsin IV|trypsinogen 4|trypsinogen 5|trypsinogen IV	serine protease 3	https://www.ensembl.org/Homo_sapiens/Gene/ExpressionAtlas?g=ENSG00000010438	http://www.ensembl.org/id/ENSG00000010438	https://www.ncbi.nlm.nih.gov/gene?term=(PRSS3[Gene Name]) AND Homo sapiens[Organism]	https://pubmed.ncbi.nlm.nih.gov/36618965 https://pubmed.ncbi.nlm.nih.gov/36517351 https://pubmed.ncbi.nlm.nih.gov/36116415 https://pubmed.ncbi.nlm.nih.gov/36056349 https://pubmed.ncbi.nlm.nih.gov/35896602 https://pubmed.ncbi.nlm.nih.gov/35417678 https://pubmed.ncbi.nlm.nih.gov/35038288 https://pubmed.ncbi.nlm.nih.gov/34827175 https://pubmed.ncbi.nlm.nih.gov/34602499 https://pubmed.ncbi.nlm.nih.go…	https://pubmed.ncbi.nlm.nih.gov/36618965 https://pubmed.ncbi.nlm.nih.gov/36517351 https://pubmed.ncbi.nlm.nih.gov/36116415 https://pubmed.ncbi.nlm.nih.gov/36056349 https://pubmed.ncbi.nlm.nih.gov/35896602 https://pubmed.ncbi.nlm.nih.gov/35417678 https://pubmed.ncbi.nlm.nih.gov/35038288 https://pubmed.ncbi.nlm.nih.gov/34827175 https://pubmed.ncbi.nlm.nih.gov/34602499 https://pubmed.ncbi.nlm.nih.go…	https://pubmed.ncbi.nlm.nih.gov/36618965 https://pubmed.ncbi.nlm.nih.gov/36517351 https://pubmed.ncbi.nlm.nih.gov/36116415 https://pubmed.ncbi.nlm.nih.gov/36056349 https://pubmed.ncbi.nlm.nih.gov/35896602 https://pubmed.ncbi.nlm.nih.gov/35860586 https://pubmed.ncbi.nlm.nih.gov/35480112 https://pubmed.ncbi.nlm.nih.gov/35417678 https://pubmed.ncbi.nlm.nih.gov/35038288 https://pubmed.ncbi.nlm.nih.go…
ENSG00000162892	IL24	104.258	5.36927	8.75248e-18	5.10399e-15	Y	interleukin 24	C49A, FISP, IL10B, MDA7, MOB5, ST16	interleukin-24|IL-4-induced secreted protein|melanocyte-associated Mda-7|melanoma differentiation-associated gene 7 protein|suppression of tumorigenicity 16 (melanoma differentiation)	interleukin 24	https://www.ensembl.org/Homo_sapiens/Gene/ExpressionAtlas?g=ENSG00000162892	http://www.ensembl.org/id/ENSG00000162892	https://www.ncbi.nlm.nih.gov/gene?term=(IL24[Gene Name]) AND Homo sapiens[Organism]	https://pubmed.ncbi.nlm.nih.gov/36282328 https://pubmed.ncbi.nlm.nih.gov/36233291 https://pubmed.ncbi.nlm.nih.gov/36225230 https://pubmed.ncbi.nlm.nih.gov/36100847 https://pubmed.ncbi.nlm.nih.gov/36057880 https://pubmed.ncbi.nlm.nih.gov/35970490 https://pubmed.ncbi.nlm.nih.gov/35915803 https://pubmed.ncbi.nlm.nih.gov/35752792 https://pubmed.ncbi.nlm.nih.gov/35667749 https://pubmed.ncbi.nlm.nih.go…	https://pubmed.ncbi.nlm.nih.gov/36282328 https://pubmed.ncbi.nlm.nih.gov/36233291 https://pubmed.ncbi.nlm.nih.gov/36225230 https://pubmed.ncbi.nlm.nih.gov/36100847 https://pubmed.ncbi.nlm.nih.gov/36057880 https://pubmed.ncbi.nlm.nih.gov/35970490 https://pubmed.ncbi.nlm.nih.gov/35915803 https://pubmed.ncbi.nlm.nih.gov/35752792 https://pubmed.ncbi.nlm.nih.gov/35667749 https://pubmed.ncbi.nlm.nih.go…	https://pubmed.ncbi.nlm.nih.gov/36513910 https://pubmed.ncbi.nlm.nih.gov/36341243 https://pubmed.ncbi.nlm.nih.gov/36282328 https://pubmed.ncbi.nlm.nih.gov/36233291 https://pubmed.ncbi.nlm.nih.gov/36225230 https://pubmed.ncbi.nlm.nih.gov/36219470 https://pubmed.ncbi.nlm.nih.gov/36178540 https://pubmed.ncbi.nlm.nih.gov/36174993 https://pubmed.ncbi.nlm.nih.gov/36100847 https://pubmed.ncbi.nlm.nih.go…
ENSG00000114812	VIPR1	392.103	-2.76298	1.10609e-17	6.2198e-15	Y	vasoactive intestinal peptide receptor 1	HVR1, II, PACAP-R-2, PACAP-R2, RDC1, V1RG, VAPC1, VIP-R-1, VIPR, VIRG, VPAC1, VPAC1R, VPCAP1R	vasoactive intestinal polypeptide receptor 1|PACAP type II receptor|VIP and PACAP receptor 1|VIP receptor, type I|VPAC1 receptor|pituitary adenylate cyclase activating polypeptide receptor, type II|type 1 vasoactive intestinal peptide receptor	vasoactive intestinal peptide receptor 1	https://www.ensembl.org/Homo_sapiens/Gene/ExpressionAtlas?g=ENSG00000114812	http://www.ensembl.org/id/ENSG00000114812	https://www.ncbi.nlm.nih.gov/gene?term=(VIPR1[Gene Name]) AND Homo sapiens[Organism]	https://pubmed.ncbi.nlm.nih.gov/36152627 https://pubmed.ncbi.nlm.nih.gov/36038907 https://pubmed.ncbi.nlm.nih.gov/36032660 https://pubmed.ncbi.nlm.nih.gov/35869757 https://pubmed.ncbi.nlm.nih.gov/35864952 https://pubmed.ncbi.nlm.nih.gov/35569815 https://pubmed.ncbi.nlm.nih.gov/35561270 https://pubmed.ncbi.nlm.nih.gov/35313084 https://pubmed.ncbi.nlm.nih.gov/34424809 https://pubmed.ncbi.nlm.nih.go…	https://pubmed.ncbi.nlm.nih.gov/36152627 https://pubmed.ncbi.nlm.nih.gov/36038907 https://pubmed.ncbi.nlm.nih.gov/36032660 https://pubmed.ncbi.nlm.nih.gov/35869757 https://pubmed.ncbi.nlm.nih.gov/35864952 https://pubmed.ncbi.nlm.nih.gov/35569815 https://pubmed.ncbi.nlm.nih.gov/35561270 https://pubmed.ncbi.nlm.nih.gov/35313084 https://pubmed.ncbi.nlm.nih.gov/34424809 https://pubmed.ncbi.nlm.nih.go…	https://pubmed.ncbi.nlm.nih.gov/36499231 https://pubmed.ncbi.nlm.nih.gov/36381283 https://pubmed.ncbi.nlm.nih.gov/36157238 https://pubmed.ncbi.nlm.nih.gov/36152627 https://pubmed.ncbi.nlm.nih.gov/36150396 https://pubmed.ncbi.nlm.nih.gov/36038907 https://pubmed.ncbi.nlm.nih.gov/36032660 https://pubmed.ncbi.nlm.nih.gov/35869757 https://pubmed.ncbi.nlm.nih.gov/35864952 https://pubmed.ncbi.nlm.nih.go…
ENSG00000139278	GLIPR1	455.529	3.13944	1.93045e-17	1.0481e-14	Y	GLI pathogenesis related 1	CRISP7, GLIPR, RTVP1	glioma pathogenesis-related protein 1|GLI pathogenesis-related 1 (glioma)|gliPR 1|protein RTVP-1|related to testis-specific, vespid, and pathogenesis proteins 1|testes-specific vespid and pathogenesis protein 1	GLI pathogenesis related 1	https://www.ensembl.org/Homo_sapiens/Gene/ExpressionAtlas?g=ENSG00000139278	http://www.ensembl.org/id/ENSG00000139278	https://www.ncbi.nlm.nih.gov/gene?term=(GLIPR1[Gene Name]) AND Homo sapiens[Organism]	https://pubmed.ncbi.nlm.nih.gov/35760898 https://pubmed.ncbi.nlm.nih.gov/34348612 https://pubmed.ncbi.nlm.nih.gov/33742130 https://pubmed.ncbi.nlm.nih.gov/33675864 https://pubmed.ncbi.nlm.nih.gov/31995627 https://pubmed.ncbi.nlm.nih.gov/31521694 https://pubmed.ncbi.nlm.nih.gov/29603552 https://pubmed.ncbi.nlm.nih.gov/28799673 https://pubmed.ncbi.nlm.nih.gov/28771580 https://pubmed.ncbi.nlm.nih.go…	https://pubmed.ncbi.nlm.nih.gov/35760898 https://pubmed.ncbi.nlm.nih.gov/34348612 https://pubmed.ncbi.nlm.nih.gov/33742130 https://pubmed.ncbi.nlm.nih.gov/33675864 https://pubmed.ncbi.nlm.nih.gov/31995627 https://pubmed.ncbi.nlm.nih.gov/31521694 https://pubmed.ncbi.nlm.nih.gov/29603552 https://pubmed.ncbi.nlm.nih.gov/28799673 https://pubmed.ncbi.nlm.nih.gov/28771580 https://pubmed.ncbi.nlm.nih.go…	https://pubmed.ncbi.nlm.nih.gov/36011359 https://pubmed.ncbi.nlm.nih.gov/35966296 https://pubmed.ncbi.nlm.nih.gov/35760898 https://pubmed.ncbi.nlm.nih.gov/34675506 https://pubmed.ncbi.nlm.nih.gov/34348612 https://pubmed.ncbi.nlm.nih.gov/33856615 https://pubmed.ncbi.nlm.nih.gov/33742130 https://pubmed.ncbi.nlm.nih.gov/33675864 https://pubmed.ncbi.nlm.nih.gov/33077700 https://pubmed.ncbi.nlm.nih.go…
ENSG00000136111	TBC1D4	947.865	-2.37674	2.37363e-17	1.24576e-14	Y	TBC1 domain family member 4	AS160, NIDDM5	TBC1 domain family member 4|TBC (Tre-2, BUB2, CDC16) domain-containing protein|akt substrate of 160 kDa	TBC1 domain family member 4	https://www.ensembl.org/Homo_sapiens/Gene/ExpressionAtlas?g=ENSG00000136111	http://www.ensembl.org/id/ENSG00000136111	https://www.ncbi.nlm.nih.gov/gene?term=(TBC1D4[Gene Name]) AND Homo sapiens[Organism]	https://pubmed.ncbi.nlm.nih.gov/36175890 https://pubmed.ncbi.nlm.nih.gov/35655923 https://pubmed.ncbi.nlm.nih.gov/35579274 https://pubmed.ncbi.nlm.nih.gov/35192682 https://pubmed.ncbi.nlm.nih.gov/35110500 https://pubmed.ncbi.nlm.nih.gov/34315727 https://pubmed.ncbi.nlm.nih.gov/34265779 https://pubmed.ncbi.nlm.nih.gov/34208471 https://pubmed.ncbi.nlm.nih.gov/34092182 https://pubmed.ncbi.nlm.nih.go…	https://pubmed.ncbi.nlm.nih.gov/36175890 https://pubmed.ncbi.nlm.nih.gov/35655923 https://pubmed.ncbi.nlm.nih.gov/35579274 https://pubmed.ncbi.nlm.nih.gov/35192682 https://pubmed.ncbi.nlm.nih.gov/35110500 https://pubmed.ncbi.nlm.nih.gov/34315727 https://pubmed.ncbi.nlm.nih.gov/34265779 https://pubmed.ncbi.nlm.nih.gov/34208471 https://pubmed.ncbi.nlm.nih.gov/34092182 https://pubmed.ncbi.nlm.nih.go…	https://pubmed.ncbi.nlm.nih.gov/36649380 https://pubmed.ncbi.nlm.nih.gov/36283703 https://pubmed.ncbi.nlm.nih.gov/36269629 https://pubmed.ncbi.nlm.nih.gov/36175890 https://pubmed.ncbi.nlm.nih.gov/36123369 https://pubmed.ncbi.nlm.nih.gov/35655923 https://pubmed.ncbi.nlm.nih.gov/35579274 https://pubmed.ncbi.nlm.nih.gov/35502572 https://pubmed.ncbi.nlm.nih.gov/35463863 https://pubmed.ncbi.nlm.nih.go…
ENSG00000112902	SEMA5A	111.458	4.62886	2.66543e-17	1.35378e-14	Y	semaphorin 5A	SEMAF, semF	semaphorin-5A|sema F|sema domain, seven thrombospondin repeats (type 1 and type 1-like), transmembrane domain (TM) and short cytoplasmic domain, (semaphorin) 5A|semaphorin F	semaphorin 5A	https://www.ensembl.org/Homo_sapiens/Gene/ExpressionAtlas?g=ENSG00000112902	http://www.ensembl.org/id/ENSG00000112902	https://www.ncbi.nlm.nih.gov/gene?term=(SEMA5A[Gene Name]) AND Homo sapiens[Organism]	https://pubmed.ncbi.nlm.nih.gov/36513513 https://pubmed.ncbi.nlm.nih.gov/36451418 https://pubmed.ncbi.nlm.nih.gov/36284269 https://pubmed.ncbi.nlm.nih.gov/35059729 https://pubmed.ncbi.nlm.nih.gov/34327814 https://pubmed.ncbi.nlm.nih.gov/33921847 https://pubmed.ncbi.nlm.nih.gov/33801296 https://pubmed.ncbi.nlm.nih.gov/33771090 https://pubmed.ncbi.nlm.nih.gov/33616619 https://pubmed.ncbi.nlm.nih.go…	https://pubmed.ncbi.nlm.nih.gov/36513513 https://pubmed.ncbi.nlm.nih.gov/36451418 https://pubmed.ncbi.nlm.nih.gov/36284269 https://pubmed.ncbi.nlm.nih.gov/35059729 https://pubmed.ncbi.nlm.nih.gov/34327814 https://pubmed.ncbi.nlm.nih.gov/33921847 https://pubmed.ncbi.nlm.nih.gov/33801296 https://pubmed.ncbi.nlm.nih.gov/33771090 https://pubmed.ncbi.nlm.nih.gov/33616619 https://pubmed.ncbi.nlm.nih.go…	https://pubmed.ncbi.nlm.nih.gov/36551769 https://pubmed.ncbi.nlm.nih.gov/36513513 https://pubmed.ncbi.nlm.nih.gov/36451418 https://pubmed.ncbi.nlm.nih.gov/36284269 https://pubmed.ncbi.nlm.nih.gov/36239547 https://pubmed.ncbi.nlm.nih.gov/35501870 https://pubmed.ncbi.nlm.nih.gov/35059729 https://pubmed.ncbi.nlm.nih.gov/34743693 https://pubmed.ncbi.nlm.nih.gov/34434651 https://pubmed.ncbi.nlm.nih.go…
ENSG00000134824	FADS2	1274.52	-2.62664	4.57833e-17	2.25268e-14	Y	fatty acid desaturase 2	D6D, DES6, FADSD6, LLCDL2, SLL0262, TU13	acyl-CoA 6-desaturase|delta-6 fatty acid desaturase|delta-6-desaturase|linoleoyl-CoA desaturase (delta-6-desaturase)-like 2	fatty acid desaturase 2	https://www.ensembl.org/Homo_sapiens/Gene/ExpressionAtlas?g=ENSG00000134824	http://www.ensembl.org/id/ENSG00000134824	https://www.ncbi.nlm.nih.gov/gene?term=(FADS2[Gene Name]) AND Homo sapiens[Organism]	https://pubmed.ncbi.nlm.nih.gov/36555340 https://pubmed.ncbi.nlm.nih.gov/36506047 https://pubmed.ncbi.nlm.nih.gov/36496978 https://pubmed.ncbi.nlm.nih.gov/36496446 https://pubmed.ncbi.nlm.nih.gov/36455308 https://pubmed.ncbi.nlm.nih.gov/36430859 https://pubmed.ncbi.nlm.nih.gov/36193932 https://pubmed.ncbi.nlm.nih.gov/36173765 https://pubmed.ncbi.nlm.nih.gov/36131251 https://pubmed.ncbi.nlm.nih.go…	https://pubmed.ncbi.nlm.nih.gov/36555340 https://pubmed.ncbi.nlm.nih.gov/36506047 https://pubmed.ncbi.nlm.nih.gov/36496978 https://pubmed.ncbi.nlm.nih.gov/36496446 https://pubmed.ncbi.nlm.nih.gov/36455308 https://pubmed.ncbi.nlm.nih.gov/36430859 https://pubmed.ncbi.nlm.nih.gov/36193932 https://pubmed.ncbi.nlm.nih.gov/36173765 https://pubmed.ncbi.nlm.nih.gov/36131251 https://pubmed.ncbi.nlm.nih.go…	https://pubmed.ncbi.nlm.nih.gov/36672833 https://pubmed.ncbi.nlm.nih.gov/36652541 https://pubmed.ncbi.nlm.nih.gov/36632618 https://pubmed.ncbi.nlm.nih.gov/36592657 https://pubmed.ncbi.nlm.nih.gov/36555340 https://pubmed.ncbi.nlm.nih.gov/36547378 https://pubmed.ncbi.nlm.nih.gov/36506047 https://pubmed.ncbi.nlm.nih.gov/36496978 https://pubmed.ncbi.nlm.nih.gov/36496446 https://pubmed.ncbi.nlm.nih.go…
ENSG00000143195	ILDR2	117.359	-4.43835	4.73958e-17	2.26136e-14	Y	immunoglobulin like domain containing receptor 2	C1orf32, dJ782G3.1	immunoglobulin-like domain-containing receptor 2|angulin-3	immunoglobulin like domain containing receptor 2	https://www.ensembl.org/Homo_sapiens/Gene/ExpressionAtlas?g=ENSG00000143195	http://www.ensembl.org/id/ENSG00000143195	https://www.ncbi.nlm.nih.gov/gene?term=(ILDR2[Gene Name]) AND Homo sapiens[Organism]	https://pubmed.ncbi.nlm.nih.gov/36557314 https://pubmed.ncbi.nlm.nih.gov/34639059 https://pubmed.ncbi.nlm.nih.gov/33800752 https://pubmed.ncbi.nlm.nih.gov/32312711 https://pubmed.ncbi.nlm.nih.gov/29431694 https://pubmed.ncbi.nlm.nih.gov/28785060 https://pubmed.ncbi.nlm.nih.gov/28709640 https://pubmed.ncbi.nlm.nih.gov/27353377 https://pubmed.ncbi.nlm.nih.gov/27195292 https://pubmed.ncbi.nlm.nih.go…	https://pubmed.ncbi.nlm.nih.gov/36557314 https://pubmed.ncbi.nlm.nih.gov/34639059 https://pubmed.ncbi.nlm.nih.gov/33800752 https://pubmed.ncbi.nlm.nih.gov/32312711 https://pubmed.ncbi.nlm.nih.gov/29431694 https://pubmed.ncbi.nlm.nih.gov/28785060 https://pubmed.ncbi.nlm.nih.gov/28709640 https://pubmed.ncbi.nlm.nih.gov/27353377 https://pubmed.ncbi.nlm.nih.gov/27195292 https://pubmed.ncbi.nlm.nih.go…	https://pubmed.ncbi.nlm.nih.gov/36557314 https://pubmed.ncbi.nlm.nih.gov/36530149 https://pubmed.ncbi.nlm.nih.gov/36147669 https://pubmed.ncbi.nlm.nih.gov/34639059 https://pubmed.ncbi.nlm.nih.gov/33863978 https://pubmed.ncbi.nlm.nih.gov/33800752 https://pubmed.ncbi.nlm.nih.gov/32312711 https://pubmed.ncbi.nlm.nih.gov/29847571 https://pubmed.ncbi.nlm.nih.gov/29631364 https://pubmed.ncbi.nlm.nih.go…
ENSG00000102172	SMS	541.604	-12.241	1.07853e-16	4.99454e-14	Y	retinoic acid induced 1	SMCR, SMS	retinoic acid-induced protein 1|Smith-Magenis syndrome chromosome region	retinoic acid induced 1	https://www.ensembl.org/Homo_sapiens/Gene/ExpressionAtlas?g=ENSG00000102172	http://www.ensembl.org/id/ENSG00000102172	https://www.ncbi.nlm.nih.gov/gene?term=(SMS[Gene Name]) AND Homo sapiens[Organism]	https://pubmed.ncbi.nlm.nih.gov/36653775 https://pubmed.ncbi.nlm.nih.gov/36645703 https://pubmed.ncbi.nlm.nih.gov/36641474 https://pubmed.ncbi.nlm.nih.gov/36631742 https://pubmed.ncbi.nlm.nih.gov/36612733 https://pubmed.ncbi.nlm.nih.gov/36608946 https://pubmed.ncbi.nlm.nih.gov/36606469 https://pubmed.ncbi.nlm.nih.gov/36604757 https://pubmed.ncbi.nlm.nih.gov/36604572 https://pubmed.ncbi.nlm.nih.go…	https://pubmed.ncbi.nlm.nih.gov/36653775 https://pubmed.ncbi.nlm.nih.gov/36645703 https://pubmed.ncbi.nlm.nih.gov/36641474 https://pubmed.ncbi.nlm.nih.gov/36631742 https://pubmed.ncbi.nlm.nih.gov/36612733 https://pubmed.ncbi.nlm.nih.gov/36608946 https://pubmed.ncbi.nlm.nih.gov/36606469 https://pubmed.ncbi.nlm.nih.gov/36604757 https://pubmed.ncbi.nlm.nih.gov/36604572 https://pubmed.ncbi.nlm.nih.go…	https://pubmed.ncbi.nlm.nih.gov/36679062 https://pubmed.ncbi.nlm.nih.gov/36675830 https://pubmed.ncbi.nlm.nih.gov/36675825 https://pubmed.ncbi.nlm.nih.gov/36674548 https://pubmed.ncbi.nlm.nih.gov/36673446 https://pubmed.ncbi.nlm.nih.gov/36673059 https://pubmed.ncbi.nlm.nih.gov/36671131 https://pubmed.ncbi.nlm.nih.gov/36671130 https://pubmed.ncbi.nlm.nih.gov/36670376 https://pubmed.ncbi.nlm.nih.go…
ENSG00000090776	EFNB1	1186.47	2.21324	3.26892e-16	1.47055e-13	Y	ephrin B1	CFND, CFNS, EFB1, EFL3, EPLG2, Elk-L, LERK2	ephrin-B1|ELK ligand|eph-related receptor tyrosine kinase ligand 2	ephrin B1	https://www.ensembl.org/Homo_sapiens/Gene/ExpressionAtlas?g=ENSG00000090776	http://www.ensembl.org/id/ENSG00000090776	https://www.ncbi.nlm.nih.gov/gene?term=(EFNB1[Gene Name]) AND Homo sapiens[Organism]	https://pubmed.ncbi.nlm.nih.gov/35871080 https://pubmed.ncbi.nlm.nih.gov/35780836 https://pubmed.ncbi.nlm.nih.gov/35741713 https://pubmed.ncbi.nlm.nih.gov/35603962 https://pubmed.ncbi.nlm.nih.gov/35305552 https://pubmed.ncbi.nlm.nih.gov/34544797 https://pubmed.ncbi.nlm.nih.gov/34455959 https://pubmed.ncbi.nlm.nih.gov/34360867 https://pubmed.ncbi.nlm.nih.gov/34174922 https://pubmed.ncbi.nlm.nih.go…	https://pubmed.ncbi.nlm.nih.gov/35871080 https://pubmed.ncbi.nlm.nih.gov/35780836 https://pubmed.ncbi.nlm.nih.gov/35741713 https://pubmed.ncbi.nlm.nih.gov/35603962 https://pubmed.ncbi.nlm.nih.gov/35305552 https://pubmed.ncbi.nlm.nih.gov/34544797 https://pubmed.ncbi.nlm.nih.gov/34455959 https://pubmed.ncbi.nlm.nih.gov/34360867 https://pubmed.ncbi.nlm.nih.gov/34174922 https://pubmed.ncbi.nlm.nih.go…	https://pubmed.ncbi.nlm.nih.gov/36649053 https://pubmed.ncbi.nlm.nih.gov/36574991 https://pubmed.ncbi.nlm.nih.gov/36558986 https://pubmed.ncbi.nlm.nih.gov/36551990 https://pubmed.ncbi.nlm.nih.gov/36276937 https://pubmed.ncbi.nlm.nih.gov/36153792 https://pubmed.ncbi.nlm.nih.gov/36052169 https://pubmed.ncbi.nlm.nih.gov/35996244 https://pubmed.ncbi.nlm.nih.gov/35949596 https://pubmed.ncbi.nlm.nih.go…
ENSG00000095752	IL11	402.656	2.74294	4.01266e-16	1.75498e-13	Y	interleukin 11	AGIF, IL-11	interleukin-11|adipogenesis inhibitory factor|oprelvekin	interleukin 11	https://www.ensembl.org/Homo_sapiens/Gene/ExpressionAtlas?g=ENSG00000095752	http://www.ensembl.org/id/ENSG00000095752	https://www.ncbi.nlm.nih.gov/gene?term=(IL11[Gene Name]) AND Homo sapiens[Organism]	https://pubmed.ncbi.nlm.nih.gov/36629985 https://pubmed.ncbi.nlm.nih.gov/36618370 https://pubmed.ncbi.nlm.nih.gov/36521373 https://pubmed.ncbi.nlm.nih.gov/36376885 https://pubmed.ncbi.nlm.nih.gov/36292942 https://pubmed.ncbi.nlm.nih.gov/36283092 https://pubmed.ncbi.nlm.nih.gov/36261332 https://pubmed.ncbi.nlm.nih.gov/36260652 https://pubmed.ncbi.nlm.nih.gov/36238304 https://pubmed.ncbi.nlm.nih.go…	https://pubmed.ncbi.nlm.nih.gov/36629985 https://pubmed.ncbi.nlm.nih.gov/36618370 https://pubmed.ncbi.nlm.nih.gov/36521373 https://pubmed.ncbi.nlm.nih.gov/36376885 https://pubmed.ncbi.nlm.nih.gov/36292942 https://pubmed.ncbi.nlm.nih.gov/36283092 https://pubmed.ncbi.nlm.nih.gov/36261332 https://pubmed.ncbi.nlm.nih.gov/36260652 https://pubmed.ncbi.nlm.nih.gov/36238304 https://pubmed.ncbi.nlm.nih.go…	https://pubmed.ncbi.nlm.nih.gov/36674664 https://pubmed.ncbi.nlm.nih.gov/36653732 https://pubmed.ncbi.nlm.nih.gov/36629985 https://pubmed.ncbi.nlm.nih.gov/36618370 https://pubmed.ncbi.nlm.nih.gov/36599329 https://pubmed.ncbi.nlm.nih.gov/36593458 https://pubmed.ncbi.nlm.nih.gov/36586671 https://pubmed.ncbi.nlm.nih.gov/36521373 https://pubmed.ncbi.nlm.nih.gov/36503802 https://pubmed.ncbi.nlm.nih.go…
ENSG00000249992	TMEM158	1767.21	3.41168	4.53738e-16	1.93084e-13	Y	transmembrane protein 158	BBP, RIS1, p40BBP	transmembrane protein 158|40 kDa BINP-binding protein|BINP receptor|Ras induced senescence 1|brain injury-derived neurotrophic peptide (BINP) binding protein|brain specific binding protein	transmembrane protein 158	https://www.ensembl.org/Homo_sapiens/Gene/ExpressionAtlas?g=ENSG00000249992	http://www.ensembl.org/id/ENSG00000249992	https://www.ncbi.nlm.nih.gov/gene?term=(TMEM158[Gene Name]) AND Homo sapiens[Organism]	https://pubmed.ncbi.nlm.nih.gov/35945754 https://pubmed.ncbi.nlm.nih.gov/34992215 https://pubmed.ncbi.nlm.nih.gov/33606446 https://pubmed.ncbi.nlm.nih.gov/33587990 https://pubmed.ncbi.nlm.nih.gov/33428142 https://pubmed.ncbi.nlm.nih.gov/33378415 https://pubmed.ncbi.nlm.nih.gov/33078287 https://pubmed.ncbi.nlm.nih.gov/32249012 https://pubmed.ncbi.nlm.nih.gov/31531884 https://pubmed.ncbi.nlm.nih.go…	https://pubmed.ncbi.nlm.nih.gov/35945754 https://pubmed.ncbi.nlm.nih.gov/34992215 https://pubmed.ncbi.nlm.nih.gov/33606446 https://pubmed.ncbi.nlm.nih.gov/33587990 https://pubmed.ncbi.nlm.nih.gov/33428142 https://pubmed.ncbi.nlm.nih.gov/33378415 https://pubmed.ncbi.nlm.nih.gov/33078287 https://pubmed.ncbi.nlm.nih.gov/32249012 https://pubmed.ncbi.nlm.nih.gov/31531884 https://pubmed.ncbi.nlm.nih.go…	https://pubmed.ncbi.nlm.nih.gov/36387246 https://pubmed.ncbi.nlm.nih.gov/35945754 https://pubmed.ncbi.nlm.nih.gov/35711843 https://pubmed.ncbi.nlm.nih.gov/34992215 https://pubmed.ncbi.nlm.nih.gov/34960643 https://pubmed.ncbi.nlm.nih.gov/34019916 https://pubmed.ncbi.nlm.nih.gov/33606446 https://pubmed.ncbi.nlm.nih.gov/33587990 https://pubmed.ncbi.nlm.nih.gov/33428142 https://pubmed.ncbi.nlm.nih.go…
ENSG00000110031	LPXN	635.958	2.33587	7.91416e-16	3.27917e-13	Y	leupaxin	LDPL	leupaxin	leupaxin	https://www.ensembl.org/Homo_sapiens/Gene/ExpressionAtlas?g=ENSG00000110031	http://www.ensembl.org/id/ENSG00000110031	https://www.ncbi.nlm.nih.gov/gene?term=(LPXN[Gene Name]) AND Homo sapiens[Organism]	https://pubmed.ncbi.nlm.nih.gov/36056084 https://pubmed.ncbi.nlm.nih.gov/35504219 https://pubmed.ncbi.nlm.nih.gov/34763648 https://pubmed.ncbi.nlm.nih.gov/34732256 https://pubmed.ncbi.nlm.nih.gov/33358908 https://pubmed.ncbi.nlm.nih.gov/32219808 https://pubmed.ncbi.nlm.nih.gov/32094207 https://pubmed.ncbi.nlm.nih.gov/29975926 https://pubmed.ncbi.nlm.nih.gov/29894279 https://pubmed.ncbi.nlm.nih.go…	https://pubmed.ncbi.nlm.nih.gov/36056084 https://pubmed.ncbi.nlm.nih.gov/35504219 https://pubmed.ncbi.nlm.nih.gov/34763648 https://pubmed.ncbi.nlm.nih.gov/34732256 https://pubmed.ncbi.nlm.nih.gov/33358908 https://pubmed.ncbi.nlm.nih.gov/32219808 https://pubmed.ncbi.nlm.nih.gov/32094207 https://pubmed.ncbi.nlm.nih.gov/29975926 https://pubmed.ncbi.nlm.nih.gov/29894279 https://pubmed.ncbi.nlm.nih.go…	https://pubmed.ncbi.nlm.nih.gov/36056084 https://pubmed.ncbi.nlm.nih.gov/35504219 https://pubmed.ncbi.nlm.nih.gov/34763648 https://pubmed.ncbi.nlm.nih.gov/34732256 https://pubmed.ncbi.nlm.nih.gov/34118218 https://pubmed.ncbi.nlm.nih.gov/33425911 https://pubmed.ncbi.nlm.nih.gov/33358908 https://pubmed.ncbi.nlm.nih.gov/33042428 https://pubmed.ncbi.nlm.nih.gov/32269569 https://pubmed.ncbi.nlm.nih.go…
ENSG00000164176	EDIL3	554.538	-2.68927	8.59027e-16	3.46804e-13	Y	EGF like repeats and discoidin domains 3	DEL1	EGF-like repeat and discoidin I-like domain-containing protein 3|EGF-like repeats and discoidin I-like domains 3|developmental endothelial locus-1|developmentally-regulated endothelial cell locus 1 protein|integrin-binding protein DEL1	EGF like repeats and discoidin domains 3	https://www.ensembl.org/Homo_sapiens/Gene/ExpressionAtlas?g=ENSG00000164176	http://www.ensembl.org/id/ENSG00000164176	https://www.ncbi.nlm.nih.gov/gene?term=(EDIL3[Gene Name]) AND Homo sapiens[Organism]	https://pubmed.ncbi.nlm.nih.gov/36087230 https://pubmed.ncbi.nlm.nih.gov/35820407 https://pubmed.ncbi.nlm.nih.gov/35247627 https://pubmed.ncbi.nlm.nih.gov/34950135 https://pubmed.ncbi.nlm.nih.gov/34801026 https://pubmed.ncbi.nlm.nih.gov/34538531 https://pubmed.ncbi.nlm.nih.gov/34493362 https://pubmed.ncbi.nlm.nih.gov/34375400 https://pubmed.ncbi.nlm.nih.gov/34325631 https://pubmed.ncbi.nlm.nih.go…	https://pubmed.ncbi.nlm.nih.gov/36087230 https://pubmed.ncbi.nlm.nih.gov/35820407 https://pubmed.ncbi.nlm.nih.gov/35247627 https://pubmed.ncbi.nlm.nih.gov/34950135 https://pubmed.ncbi.nlm.nih.gov/34801026 https://pubmed.ncbi.nlm.nih.gov/34538531 https://pubmed.ncbi.nlm.nih.gov/34493362 https://pubmed.ncbi.nlm.nih.gov/34375400 https://pubmed.ncbi.nlm.nih.gov/34325631 https://pubmed.ncbi.nlm.nih.go…	https://pubmed.ncbi.nlm.nih.gov/36532069 https://pubmed.ncbi.nlm.nih.gov/36517972 https://pubmed.ncbi.nlm.nih.gov/36428847 https://pubmed.ncbi.nlm.nih.gov/36087230 https://pubmed.ncbi.nlm.nih.gov/36065978 https://pubmed.ncbi.nlm.nih.gov/35935760 https://pubmed.ncbi.nlm.nih.gov/35820407 https://pubmed.ncbi.nlm.nih.gov/35550248 https://pubmed.ncbi.nlm.nih.gov/35360858 https://pubmed.ncbi.nlm.nih.go…
ENSG00000176170	SPHK1	593.137	2.57919	1.02632e-15	4.03987e-13	Y	sphingosine kinase 1	SPHK	sphingosine kinase 1|SK 1|SPK 1|acetyltransferase SPHK1	sphingosine kinase 1	https://www.ensembl.org/Homo_sapiens/Gene/ExpressionAtlas?g=ENSG00000176170	http://www.ensembl.org/id/ENSG00000176170	https://www.ncbi.nlm.nih.gov/gene?term=(SPHK1[Gene Name]) AND Homo sapiens[Organism]	https://pubmed.ncbi.nlm.nih.gov/36600310 https://pubmed.ncbi.nlm.nih.gov/36543771 https://pubmed.ncbi.nlm.nih.gov/36361531 https://pubmed.ncbi.nlm.nih.gov/36309544 https://pubmed.ncbi.nlm.nih.gov/36266756 https://pubmed.ncbi.nlm.nih.gov/36261193 https://pubmed.ncbi.nlm.nih.gov/36139362 https://pubmed.ncbi.nlm.nih.gov/36071219 https://pubmed.ncbi.nlm.nih.gov/36041511 https://pubmed.ncbi.nlm.nih.go…	https://pubmed.ncbi.nlm.nih.gov/36600310 https://pubmed.ncbi.nlm.nih.gov/36543771 https://pubmed.ncbi.nlm.nih.gov/36361531 https://pubmed.ncbi.nlm.nih.gov/36309544 https://pubmed.ncbi.nlm.nih.gov/36266756 https://pubmed.ncbi.nlm.nih.gov/36261193 https://pubmed.ncbi.nlm.nih.gov/36139362 https://pubmed.ncbi.nlm.nih.gov/36071219 https://pubmed.ncbi.nlm.nih.gov/36041511 https://pubmed.ncbi.nlm.nih.go…	https://pubmed.ncbi.nlm.nih.gov/36674922 https://pubmed.ncbi.nlm.nih.gov/36672336 https://pubmed.ncbi.nlm.nih.gov/36660701 https://pubmed.ncbi.nlm.nih.gov/36644886 https://pubmed.ncbi.nlm.nih.gov/36643043 https://pubmed.ncbi.nlm.nih.gov/36622069 https://pubmed.ncbi.nlm.nih.gov/36602239 https://pubmed.ncbi.nlm.nih.gov/36600310 https://pubmed.ncbi.nlm.nih.gov/36597202 https://pubmed.ncbi.nlm.nih.go…
ENSG00000112972	HMGCS1	969.528	-2.26879	1.44187e-15	5.53713e-13	Y	3-hydroxy-3-methylglutaryl-CoA synthase 1	HMGCS	hydroxymethylglutaryl-CoA synthase, cytoplasmic|3-hydroxy-3-methylglutaryl coenzyme A (HMG-CoA) synthase|3-hydroxy-3-methylglutaryl-CoA synthase 1 (soluble)|3-hydroxy-3-methylglutaryl-Coenzyme A synthase 1 (soluble)	3-hydroxy-3-methylglutaryl-CoA synthase 1	https://www.ensembl.org/Homo_sapiens/Gene/ExpressionAtlas?g=ENSG00000112972	http://www.ensembl.org/id/ENSG00000112972	https://www.ncbi.nlm.nih.gov/gene?term=(HMGCS1[Gene Name]) AND Homo sapiens[Organism]	https://pubmed.ncbi.nlm.nih.gov/36552870 https://pubmed.ncbi.nlm.nih.gov/36356901 https://pubmed.ncbi.nlm.nih.gov/36348011 https://pubmed.ncbi.nlm.nih.gov/36328117 https://pubmed.ncbi.nlm.nih.gov/35932580 https://pubmed.ncbi.nlm.nih.gov/35562887 https://pubmed.ncbi.nlm.nih.gov/35552960 https://pubmed.ncbi.nlm.nih.gov/35546998 https://pubmed.ncbi.nlm.nih.gov/35504394 https://pubmed.ncbi.nlm.nih.go…	https://pubmed.ncbi.nlm.nih.gov/36552870 https://pubmed.ncbi.nlm.nih.gov/36356901 https://pubmed.ncbi.nlm.nih.gov/36348011 https://pubmed.ncbi.nlm.nih.gov/36328117 https://pubmed.ncbi.nlm.nih.gov/35932580 https://pubmed.ncbi.nlm.nih.gov/35562887 https://pubmed.ncbi.nlm.nih.gov/35552960 https://pubmed.ncbi.nlm.nih.gov/35546998 https://pubmed.ncbi.nlm.nih.gov/35504394 https://pubmed.ncbi.nlm.nih.go…	https://pubmed.ncbi.nlm.nih.gov/36558373 https://pubmed.ncbi.nlm.nih.gov/36552870 https://pubmed.ncbi.nlm.nih.gov/36440846 https://pubmed.ncbi.nlm.nih.gov/36405730 https://pubmed.ncbi.nlm.nih.gov/36381108 https://pubmed.ncbi.nlm.nih.gov/36356901 https://pubmed.ncbi.nlm.nih.gov/36348011 https://pubmed.ncbi.nlm.nih.gov/36328117 https://pubmed.ncbi.nlm.nih.gov/36158924 https://pubmed.ncbi.nlm.nih.go…
ENSG00000178343	SHISA3	123.993	-3.78018	1.53795e-15	5.76549e-13	Y	shisa family member 3	hShisa3	protein shisa-3 homolog|shisa homolog 3	shisa family member 3	https://www.ensembl.org/Homo_sapiens/Gene/ExpressionAtlas?g=ENSG00000178343	http://www.ensembl.org/id/ENSG00000178343	https://www.ncbi.nlm.nih.gov/gene?term=(SHISA3[Gene Name]) AND Homo sapiens[Organism]	https://pubmed.ncbi.nlm.nih.gov/35187107 https://pubmed.ncbi.nlm.nih.gov/33933781 https://pubmed.ncbi.nlm.nih.gov/33731112 https://pubmed.ncbi.nlm.nih.gov/33642344 https://pubmed.ncbi.nlm.nih.gov/32692756 https://pubmed.ncbi.nlm.nih.gov/32378780 https://pubmed.ncbi.nlm.nih.gov/32324312 https://pubmed.ncbi.nlm.nih.gov/31801598 https://pubmed.ncbi.nlm.nih.gov/31582141 https://pubmed.ncbi.nlm.nih.go…	https://pubmed.ncbi.nlm.nih.gov/35187107 https://pubmed.ncbi.nlm.nih.gov/33933781 https://pubmed.ncbi.nlm.nih.gov/33731112 https://pubmed.ncbi.nlm.nih.gov/33642344 https://pubmed.ncbi.nlm.nih.gov/32692756 https://pubmed.ncbi.nlm.nih.gov/32378780 https://pubmed.ncbi.nlm.nih.gov/32324312 https://pubmed.ncbi.nlm.nih.gov/31801598 https://pubmed.ncbi.nlm.nih.gov/31582141 https://pubmed.ncbi.nlm.nih.go…	https://pubmed.ncbi.nlm.nih.gov/36003650 https://pubmed.ncbi.nlm.nih.gov/35399048 https://pubmed.ncbi.nlm.nih.gov/35360871 https://pubmed.ncbi.nlm.nih.gov/35187107 https://pubmed.ncbi.nlm.nih.gov/34885084 https://pubmed.ncbi.nlm.nih.gov/34692796 https://pubmed.ncbi.nlm.nih.gov/34691158 https://pubmed.ncbi.nlm.nih.gov/34659906 https://pubmed.ncbi.nlm.nih.gov/33933781 https://pubmed.ncbi.nlm.nih.go…
ENSG00000145703	IQGAP2	179.29	-3.20193	2.11527e-15	7.74534e-13	Y	IQ motif containing GTPase activating protein 2		ras GTPase-activating-like protein IQGAP2	IQ motif containing GTPase activating protein 2	https://www.ensembl.org/Homo_sapiens/Gene/ExpressionAtlas?g=ENSG00000145703	http://www.ensembl.org/id/ENSG00000145703	https://www.ncbi.nlm.nih.gov/gene?term=(IQGAP2[Gene Name]) AND Homo sapiens[Organism]	https://pubmed.ncbi.nlm.nih.gov/36362301 https://pubmed.ncbi.nlm.nih.gov/36320006 https://pubmed.ncbi.nlm.nih.gov/35901346 https://pubmed.ncbi.nlm.nih.gov/34935307 https://pubmed.ncbi.nlm.nih.gov/34830479 https://pubmed.ncbi.nlm.nih.gov/34822764 https://pubmed.ncbi.nlm.nih.gov/34615693 https://pubmed.ncbi.nlm.nih.gov/34352343 https://pubmed.ncbi.nlm.nih.gov/34276655 https://pubmed.ncbi.nlm.nih.go…	https://pubmed.ncbi.nlm.nih.gov/36362301 https://pubmed.ncbi.nlm.nih.gov/36320006 https://pubmed.ncbi.nlm.nih.gov/35901346 https://pubmed.ncbi.nlm.nih.gov/34935307 https://pubmed.ncbi.nlm.nih.gov/34830479 https://pubmed.ncbi.nlm.nih.gov/34822764 https://pubmed.ncbi.nlm.nih.gov/34615693 https://pubmed.ncbi.nlm.nih.gov/34352343 https://pubmed.ncbi.nlm.nih.gov/34276655 https://pubmed.ncbi.nlm.nih.go…	https://pubmed.ncbi.nlm.nih.gov/36574072 https://pubmed.ncbi.nlm.nih.gov/36559011 https://pubmed.ncbi.nlm.nih.gov/36380106 https://pubmed.ncbi.nlm.nih.gov/36362301 https://pubmed.ncbi.nlm.nih.gov/36320006 https://pubmed.ncbi.nlm.nih.gov/36276098 https://pubmed.ncbi.nlm.nih.gov/36165849 https://pubmed.ncbi.nlm.nih.gov/36059983 https://pubmed.ncbi.nlm.nih.gov/36012107 https://pubmed.ncbi.nlm.nih.go…
ENSG00000158270	COLEC12	497.667	-3.03628	3.16488e-15	1.13252e-12	Y	collectin subfamily member 12	CLP1, NSR2, SCARA4, SRCL	collectin-12|collectin placenta protein 1|collectin sub-family member 12|hCL-P1|nurse cell scavenger receptor 2|scavenger receptor class A, member 4|scavenger receptor with C-type lectin	collectin subfamily member 12	https://www.ensembl.org/Homo_sapiens/Gene/ExpressionAtlas?g=ENSG00000158270	http://www.ensembl.org/id/ENSG00000158270	https://www.ncbi.nlm.nih.gov/gene?term=(COLEC12[Gene Name]) AND Homo sapiens[Organism]	https://pubmed.ncbi.nlm.nih.gov/36519770 https://pubmed.ncbi.nlm.nih.gov/36131924 https://pubmed.ncbi.nlm.nih.gov/35500934 https://pubmed.ncbi.nlm.nih.gov/34260887 https://pubmed.ncbi.nlm.nih.gov/32822099 https://pubmed.ncbi.nlm.nih.gov/32595650 https://pubmed.ncbi.nlm.nih.gov/31482100 https://pubmed.ncbi.nlm.nih.gov/31344978 https://pubmed.ncbi.nlm.nih.gov/29629573 https://pubmed.ncbi.nlm.nih.go…	https://pubmed.ncbi.nlm.nih.gov/36519770 https://pubmed.ncbi.nlm.nih.gov/36131924 https://pubmed.ncbi.nlm.nih.gov/35500934 https://pubmed.ncbi.nlm.nih.gov/34260887 https://pubmed.ncbi.nlm.nih.gov/32822099 https://pubmed.ncbi.nlm.nih.gov/32595650 https://pubmed.ncbi.nlm.nih.gov/31482100 https://pubmed.ncbi.nlm.nih.gov/31344978 https://pubmed.ncbi.nlm.nih.gov/29629573 https://pubmed.ncbi.nlm.nih.go…	https://pubmed.ncbi.nlm.nih.gov/36519770 https://pubmed.ncbi.nlm.nih.gov/36131924 https://pubmed.ncbi.nlm.nih.gov/35500934 https://pubmed.ncbi.nlm.nih.gov/35307477 https://pubmed.ncbi.nlm.nih.gov/34691257 https://pubmed.ncbi.nlm.nih.gov/34691191 https://pubmed.ncbi.nlm.nih.gov/34627241 https://pubmed.ncbi.nlm.nih.gov/34260887 https://pubmed.ncbi.nlm.nih.gov/34203011 https://pubmed.ncbi.nlm.nih.go…
ENSG00000125726	CD70	692.858	2.47624	3.38889e-15	1.18574e-12	Y	CD70 molecule	CD27-L, CD27L, CD27LG, LPFS3, TNFSF7, TNLG8A	CD70 antigen|CD27 ligand|Ki-24 antigen|surface antigen CD70|tumor necrosis factor ligand 8A|tumor necrosis factor ligand superfamily member 7	CD70 molecule	https://www.ensembl.org/Homo_sapiens/Gene/ExpressionAtlas?g=ENSG00000125726	http://www.ensembl.org/id/ENSG00000125726	https://www.ncbi.nlm.nih.gov/gene?term=(CD70[Gene Name]) AND Homo sapiens[Organism]	https://pubmed.ncbi.nlm.nih.gov/36537906 https://pubmed.ncbi.nlm.nih.gov/36500549 https://pubmed.ncbi.nlm.nih.gov/36471481 https://pubmed.ncbi.nlm.nih.gov/36409047 https://pubmed.ncbi.nlm.nih.gov/36327941 https://pubmed.ncbi.nlm.nih.gov/36260275 https://pubmed.ncbi.nlm.nih.gov/36239354 https://pubmed.ncbi.nlm.nih.gov/36211974 https://pubmed.ncbi.nlm.nih.gov/36210217 https://pubmed.ncbi.nlm.nih.go…	https://pubmed.ncbi.nlm.nih.gov/36537906 https://pubmed.ncbi.nlm.nih.gov/36500549 https://pubmed.ncbi.nlm.nih.gov/36471481 https://pubmed.ncbi.nlm.nih.gov/36409047 https://pubmed.ncbi.nlm.nih.gov/36327941 https://pubmed.ncbi.nlm.nih.gov/36260275 https://pubmed.ncbi.nlm.nih.gov/36239354 https://pubmed.ncbi.nlm.nih.gov/36211974 https://pubmed.ncbi.nlm.nih.gov/36210217 https://pubmed.ncbi.nlm.nih.go…	https://pubmed.ncbi.nlm.nih.gov/36674828 https://pubmed.ncbi.nlm.nih.gov/36606241 https://pubmed.ncbi.nlm.nih.gov/36537906 https://pubmed.ncbi.nlm.nih.gov/36500549 https://pubmed.ncbi.nlm.nih.gov/36480032 https://pubmed.ncbi.nlm.nih.gov/36471481 https://pubmed.ncbi.nlm.nih.gov/36428917 https://pubmed.ncbi.nlm.nih.gov/36409047 https://pubmed.ncbi.nlm.nih.gov/36394119 https://pubmed.ncbi.nlm.nih.go…
ENSG00000115457	IGFBP2	380.681	-2.82337	4.11222e-15	1.40754e-12	Y	insulin like growth factor binding protein 2	IBP2, IGF-BP53	insulin-like growth factor-binding protein 2|IGF-binding protein 2|insulin-like growth factor binding protein 2, 36kDa	insulin like growth factor binding protein 2	https://www.ensembl.org/Homo_sapiens/Gene/ExpressionAtlas?g=ENSG00000115457	http://www.ensembl.org/id/ENSG00000115457	https://www.ncbi.nlm.nih.gov/gene?term=(IGFBP2[Gene Name]) AND Homo sapiens[Organism]	https://pubmed.ncbi.nlm.nih.gov/36556226 https://pubmed.ncbi.nlm.nih.gov/36430152 https://pubmed.ncbi.nlm.nih.gov/36411774 https://pubmed.ncbi.nlm.nih.gov/36382663 https://pubmed.ncbi.nlm.nih.gov/36382061 https://pubmed.ncbi.nlm.nih.gov/36360219 https://pubmed.ncbi.nlm.nih.gov/36265781 https://pubmed.ncbi.nlm.nih.gov/36213583 https://pubmed.ncbi.nlm.nih.gov/36206311 https://pubmed.ncbi.nlm.nih.go…	https://pubmed.ncbi.nlm.nih.gov/36556226 https://pubmed.ncbi.nlm.nih.gov/36430152 https://pubmed.ncbi.nlm.nih.gov/36411774 https://pubmed.ncbi.nlm.nih.gov/36382663 https://pubmed.ncbi.nlm.nih.gov/36382061 https://pubmed.ncbi.nlm.nih.gov/36360219 https://pubmed.ncbi.nlm.nih.gov/36265781 https://pubmed.ncbi.nlm.nih.gov/36213583 https://pubmed.ncbi.nlm.nih.gov/36206311 https://pubmed.ncbi.nlm.nih.go…	https://pubmed.ncbi.nlm.nih.gov/36675700 https://pubmed.ncbi.nlm.nih.gov/36661917 https://pubmed.ncbi.nlm.nih.gov/36658131 https://pubmed.ncbi.nlm.nih.gov/36620557 https://pubmed.ncbi.nlm.nih.gov/36587453 https://pubmed.ncbi.nlm.nih.gov/36584633 https://pubmed.ncbi.nlm.nih.gov/36568212 https://pubmed.ncbi.nlm.nih.gov/36561518 https://pubmed.ncbi.nlm.nih.gov/36556226 https://pubmed.ncbi.nlm.nih.go…
ENSG00000148677	ANKRD1	132.299	-7.19752	4.65721e-15	1.56016e-12	Y	ankyrin repeat domain 1	ALRP, C-193, CARP, CVARP, MCARP, bA320F15.2	ankyrin repeat domain-containing protein 1|ankyrin repeat domain 1 (cardiac muscle)|cardiac ankyrin repeat protein|cytokine-inducible gene C-193 protein|cytokine-inducible nuclear protein|epididymis secretory sperm binding protein|liver ankyrin repeat domain 1	ankyrin repeat domain 1	https://www.ensembl.org/Homo_sapiens/Gene/ExpressionAtlas?g=ENSG00000148677	http://www.ensembl.org/id/ENSG00000148677	https://www.ncbi.nlm.nih.gov/gene?term=(ANKRD1[Gene Name]) AND Homo sapiens[Organism]	https://pubmed.ncbi.nlm.nih.gov/36502440 https://pubmed.ncbi.nlm.nih.gov/35575247 https://pubmed.ncbi.nlm.nih.gov/35560009 https://pubmed.ncbi.nlm.nih.gov/35480316 https://pubmed.ncbi.nlm.nih.gov/35397626 https://pubmed.ncbi.nlm.nih.gov/35140327 https://pubmed.ncbi.nlm.nih.gov/35027292 https://pubmed.ncbi.nlm.nih.gov/34918678 https://pubmed.ncbi.nlm.nih.gov/34752814 https://pubmed.ncbi.nlm.nih.go…	https://pubmed.ncbi.nlm.nih.gov/36502440 https://pubmed.ncbi.nlm.nih.gov/35575247 https://pubmed.ncbi.nlm.nih.gov/35560009 https://pubmed.ncbi.nlm.nih.gov/35480316 https://pubmed.ncbi.nlm.nih.gov/35397626 https://pubmed.ncbi.nlm.nih.gov/35140327 https://pubmed.ncbi.nlm.nih.gov/35027292 https://pubmed.ncbi.nlm.nih.gov/34918678 https://pubmed.ncbi.nlm.nih.gov/34752814 https://pubmed.ncbi.nlm.nih.go…	https://pubmed.ncbi.nlm.nih.gov/36551326 https://pubmed.ncbi.nlm.nih.gov/36515138 https://pubmed.ncbi.nlm.nih.gov/36502440 https://pubmed.ncbi.nlm.nih.gov/36430640 https://pubmed.ncbi.nlm.nih.gov/36361958 https://pubmed.ncbi.nlm.nih.gov/36150502 https://pubmed.ncbi.nlm.nih.gov/36077170 https://pubmed.ncbi.nlm.nih.gov/36038328 https://pubmed.ncbi.nlm.nih.gov/35997993 https://pubmed.ncbi.nlm.nih.go…
ENSG00000198959	TGM2	124.863	-6.68499	5.9592e-15	1.95074e-12	Y	transglutaminase 2	G(h), TG(C), TGC, hTG2, tTG	protein-glutamine gamma-glutamyltransferase 2|C polypeptide, protein-glutamine-gamma-glutamyltransferase|TGase C|TGase H|TGase II|TGase-2|erythrocyte transglutaminase|heart G alpha(h)|hhG alpha(h)|isopeptidase TGM2|protein G alpha(h)|protein-glutamine deamidase TGM2|protein-glutamine dopaminyltransferase TGM2|protein-glutamine histaminyltransferase TGM2|protein-glutamine noradrenalinyltransferase…	transglutaminase 2	https://www.ensembl.org/Homo_sapiens/Gene/ExpressionAtlas?g=ENSG00000198959	http://www.ensembl.org/id/ENSG00000198959	https://www.ncbi.nlm.nih.gov/gene?term=(TGM2[Gene Name]) AND Homo sapiens[Organism]	https://pubmed.ncbi.nlm.nih.gov/36639156 https://pubmed.ncbi.nlm.nih.gov/36499332 https://pubmed.ncbi.nlm.nih.gov/36107633 https://pubmed.ncbi.nlm.nih.gov/36078046 https://pubmed.ncbi.nlm.nih.gov/36041715 https://pubmed.ncbi.nlm.nih.gov/36038099 https://pubmed.ncbi.nlm.nih.gov/36010606 https://pubmed.ncbi.nlm.nih.gov/35931141 https://pubmed.ncbi.nlm.nih.gov/35867798 https://pubmed.ncbi.nlm.nih.go…	https://pubmed.ncbi.nlm.nih.gov/36639156 https://pubmed.ncbi.nlm.nih.gov/36499332 https://pubmed.ncbi.nlm.nih.gov/36107633 https://pubmed.ncbi.nlm.nih.gov/36078046 https://pubmed.ncbi.nlm.nih.gov/36041715 https://pubmed.ncbi.nlm.nih.gov/36038099 https://pubmed.ncbi.nlm.nih.gov/36010606 https://pubmed.ncbi.nlm.nih.gov/35931141 https://pubmed.ncbi.nlm.nih.gov/35867798 https://pubmed.ncbi.nlm.nih.go…	https://pubmed.ncbi.nlm.nih.gov/36655602 https://pubmed.ncbi.nlm.nih.gov/36639156 https://pubmed.ncbi.nlm.nih.gov/36633172 https://pubmed.ncbi.nlm.nih.gov/36625590 https://pubmed.ncbi.nlm.nih.gov/36499332 https://pubmed.ncbi.nlm.nih.gov/36470430 https://pubmed.ncbi.nlm.nih.gov/36421678 https://pubmed.ncbi.nlm.nih.gov/36354672 https://pubmed.ncbi.nlm.nih.gov/36353796 https://pubmed.ncbi.nlm.nih.go…
ENSG00000106034	CPED1	183.504	-3.11235	6.0709e-15	1.95074e-12	Y	cadherin like and PC-esterase domain containing 1	C7orf58	cadherin-like and PC-esterase domain-containing protein 1	cadherin like and PC-esterase domain containing 1	https://www.ensembl.org/Homo_sapiens/Gene/ExpressionAtlas?g=ENSG00000106034	http://www.ensembl.org/id/ENSG00000106034	https://www.ncbi.nlm.nih.gov/gene?term=(CPED1[Gene Name]) AND Homo sapiens[Organism]	https://pubmed.ncbi.nlm.nih.gov/35689460 https://pubmed.ncbi.nlm.nih.gov/32827035 https://pubmed.ncbi.nlm.nih.gov/30890710 https://pubmed.ncbi.nlm.nih.gov/30779856 https://pubmed.ncbi.nlm.nih.gov/30670769 https://pubmed.ncbi.nlm.nih.gov/29935354 https://pubmed.ncbi.nlm.nih.gov/29240982 https://pubmed.ncbi.nlm.nih.gov/28761973 https://pubmed.ncbi.nlm.nih.gov/28743860 https://pubmed.ncbi.nlm.nih.go…	https://pubmed.ncbi.nlm.nih.gov/35689460 https://pubmed.ncbi.nlm.nih.gov/32827035 https://pubmed.ncbi.nlm.nih.gov/30890710 https://pubmed.ncbi.nlm.nih.gov/30779856 https://pubmed.ncbi.nlm.nih.gov/30670769 https://pubmed.ncbi.nlm.nih.gov/29935354 https://pubmed.ncbi.nlm.nih.gov/29240982 https://pubmed.ncbi.nlm.nih.gov/28761973 https://pubmed.ncbi.nlm.nih.gov/28743860 https://pubmed.ncbi.nlm.nih.go…	https://pubmed.ncbi.nlm.nih.gov/36346812 https://pubmed.ncbi.nlm.nih.gov/35689460 https://pubmed.ncbi.nlm.nih.gov/35501119 https://pubmed.ncbi.nlm.nih.gov/32827035 https://pubmed.ncbi.nlm.nih.gov/32489286 https://pubmed.ncbi.nlm.nih.gov/30890710 https://pubmed.ncbi.nlm.nih.gov/30779856 https://pubmed.ncbi.nlm.nih.gov/30670769 https://pubmed.ncbi.nlm.nih.gov/30038055 https://pubmed.ncbi.nlm.nih.go…
ENSG00000154654	NCAM2	150.914	-3.26867	9.9975e-15	3.14821e-12	Y	paired like homeobox 2A	ARIX, CFEOM2, FEOM2, NCAM2, PMX2A	paired mesoderm homeobox protein 2A|ARIX1 homeodomain protein|aristaless homeobox homolog|aristaless homeobox protein homolog|arix homeodomain protein	paired like homeobox 2A	https://www.ensembl.org/Homo_sapiens/Gene/ExpressionAtlas?g=ENSG00000154654	http://www.ensembl.org/id/ENSG00000154654	https://www.ncbi.nlm.nih.gov/gene?term=(NCAM2[Gene Name]) AND Homo sapiens[Organism]	https://pubmed.ncbi.nlm.nih.gov/36300719 https://pubmed.ncbi.nlm.nih.gov/35869277 https://pubmed.ncbi.nlm.nih.gov/34576185 https://pubmed.ncbi.nlm.nih.gov/33723406 https://pubmed.ncbi.nlm.nih.gov/33608310 https://pubmed.ncbi.nlm.nih.gov/33548223 https://pubmed.ncbi.nlm.nih.gov/32043120 https://pubmed.ncbi.nlm.nih.gov/29895898 https://pubmed.ncbi.nlm.nih.gov/29522129 https://pubmed.ncbi.nlm.nih.go…	https://pubmed.ncbi.nlm.nih.gov/36300719 https://pubmed.ncbi.nlm.nih.gov/35869277 https://pubmed.ncbi.nlm.nih.gov/34576185 https://pubmed.ncbi.nlm.nih.gov/33723406 https://pubmed.ncbi.nlm.nih.gov/33608310 https://pubmed.ncbi.nlm.nih.gov/33548223 https://pubmed.ncbi.nlm.nih.gov/32043120 https://pubmed.ncbi.nlm.nih.gov/29895898 https://pubmed.ncbi.nlm.nih.gov/29522129 https://pubmed.ncbi.nlm.nih.go…	https://pubmed.ncbi.nlm.nih.gov/36328537 https://pubmed.ncbi.nlm.nih.gov/36300719 https://pubmed.ncbi.nlm.nih.gov/36251052 https://pubmed.ncbi.nlm.nih.gov/35883402 https://pubmed.ncbi.nlm.nih.gov/35869277 https://pubmed.ncbi.nlm.nih.gov/35687299 https://pubmed.ncbi.nlm.nih.gov/35602555 https://pubmed.ncbi.nlm.nih.gov/35391799 https://pubmed.ncbi.nlm.nih.gov/34992628 https://pubmed.ncbi.nlm.nih.go…
ENSG00000117152	RGS4	119.833	-4.43274	1.54423e-14	4.76744e-12	Y	regulator of G protein signaling 4	RGP4, SCZD9	regulator of G-protein signaling 4|schizophrenia disorder 9	regulator of G protein signaling 4	https://www.ensembl.org/Homo_sapiens/Gene/ExpressionAtlas?g=ENSG00000117152	http://www.ensembl.org/id/ENSG00000117152	https://www.ncbi.nlm.nih.gov/gene?term=(RGS4[Gene Name]) AND Homo sapiens[Organism]	https://pubmed.ncbi.nlm.nih.gov/36466094 https://pubmed.ncbi.nlm.nih.gov/36443250 https://pubmed.ncbi.nlm.nih.gov/36430806 https://pubmed.ncbi.nlm.nih.gov/36423402 https://pubmed.ncbi.nlm.nih.gov/36384958 https://pubmed.ncbi.nlm.nih.gov/36309699 https://pubmed.ncbi.nlm.nih.gov/36050939 https://pubmed.ncbi.nlm.nih.gov/35872997 https://pubmed.ncbi.nlm.nih.gov/35781563 https://pubmed.ncbi.nlm.nih.go…	https://pubmed.ncbi.nlm.nih.gov/36466094 https://pubmed.ncbi.nlm.nih.gov/36443250 https://pubmed.ncbi.nlm.nih.gov/36430806 https://pubmed.ncbi.nlm.nih.gov/36423402 https://pubmed.ncbi.nlm.nih.gov/36384958 https://pubmed.ncbi.nlm.nih.gov/36309699 https://pubmed.ncbi.nlm.nih.gov/36050939 https://pubmed.ncbi.nlm.nih.gov/35872997 https://pubmed.ncbi.nlm.nih.gov/35781563 https://pubmed.ncbi.nlm.nih.go…	https://pubmed.ncbi.nlm.nih.gov/36547076 https://pubmed.ncbi.nlm.nih.gov/36466094 https://pubmed.ncbi.nlm.nih.gov/36443250 https://pubmed.ncbi.nlm.nih.gov/36437991 https://pubmed.ncbi.nlm.nih.gov/36430806 https://pubmed.ncbi.nlm.nih.gov/36423402 https://pubmed.ncbi.nlm.nih.gov/36384958 https://pubmed.ncbi.nlm.nih.gov/36311291 https://pubmed.ncbi.nlm.nih.gov/36309699 https://pubmed.ncbi.nlm.nih.go…
ENSG00000206172	HBA1	122.29	-5.23113	2.16985e-14	6.45967e-12	Y	hemoglobin subunit alpha 1	ECYT7, HBA-T3, HBH, METHBA	hemoglobin subunit alpha|alpha globin chain|alpha one globin|alpha-2 globin chain|delta globin|hemoglobin alpha 1 globin chain|hemoglobin, alpha 1	hemoglobin subunit alpha 1	https://www.ensembl.org/Homo_sapiens/Gene/ExpressionAtlas?g=ENSG00000206172	http://www.ensembl.org/id/ENSG00000206172	https://www.ncbi.nlm.nih.gov/gene?term=(HBA1[Gene Name]) AND Homo sapiens[Organism]	https://pubmed.ncbi.nlm.nih.gov/36655240 https://pubmed.ncbi.nlm.nih.gov/36651310 https://pubmed.ncbi.nlm.nih.gov/36647854 https://pubmed.ncbi.nlm.nih.gov/36647663 https://pubmed.ncbi.nlm.nih.gov/36647650 https://pubmed.ncbi.nlm.nih.gov/36647113 https://pubmed.ncbi.nlm.nih.gov/36647067 https://pubmed.ncbi.nlm.nih.gov/36642532 https://pubmed.ncbi.nlm.nih.gov/36639632 https://pubmed.ncbi.nlm.nih.go…	https://pubmed.ncbi.nlm.nih.gov/36655240 https://pubmed.ncbi.nlm.nih.gov/36651310 https://pubmed.ncbi.nlm.nih.gov/36647854 https://pubmed.ncbi.nlm.nih.gov/36647663 https://pubmed.ncbi.nlm.nih.gov/36647650 https://pubmed.ncbi.nlm.nih.gov/36647113 https://pubmed.ncbi.nlm.nih.gov/36647067 https://pubmed.ncbi.nlm.nih.gov/36642532 https://pubmed.ncbi.nlm.nih.gov/36639632 https://pubmed.ncbi.nlm.nih.go…	https://pubmed.ncbi.nlm.nih.gov/36677773 https://pubmed.ncbi.nlm.nih.gov/36676765 https://pubmed.ncbi.nlm.nih.gov/36676181 https://pubmed.ncbi.nlm.nih.gov/36676086 https://pubmed.ncbi.nlm.nih.gov/36675692 https://pubmed.ncbi.nlm.nih.gov/36675142 https://pubmed.ncbi.nlm.nih.gov/36674274 https://pubmed.ncbi.nlm.nih.gov/36673682 https://pubmed.ncbi.nlm.nih.gov/36672833 https://pubmed.ncbi.nlm.nih.go…
ENSG00000135636	DYSF	121.606	-3.68866	2.17442e-14	6.45967e-12	Y	dysferlin	FER1L1, LGMD2B, LGMDR2, MMD1	dysferlin|dystrophy-associated fer-1-like 1|fer-1-like family member 1|fer-1-like protein 1|limb girdle muscular dystrophy 2B (autosomal recessive)	dysferlin	https://www.ensembl.org/Homo_sapiens/Gene/ExpressionAtlas?g=ENSG00000135636	http://www.ensembl.org/id/ENSG00000135636	https://www.ncbi.nlm.nih.gov/gene?term=(DYSF[Gene Name]) AND Homo sapiens[Organism]	https://pubmed.ncbi.nlm.nih.gov/36604653 https://pubmed.ncbi.nlm.nih.gov/36469164 https://pubmed.ncbi.nlm.nih.gov/36401031 https://pubmed.ncbi.nlm.nih.gov/36319958 https://pubmed.ncbi.nlm.nih.gov/36259389 https://pubmed.ncbi.nlm.nih.gov/36042458 https://pubmed.ncbi.nlm.nih.gov/36029111 https://pubmed.ncbi.nlm.nih.gov/36012197 https://pubmed.ncbi.nlm.nih.gov/35962550 https://pubmed.ncbi.nlm.nih.go…	https://pubmed.ncbi.nlm.nih.gov/36604653 https://pubmed.ncbi.nlm.nih.gov/36469164 https://pubmed.ncbi.nlm.nih.gov/36401031 https://pubmed.ncbi.nlm.nih.gov/36319958 https://pubmed.ncbi.nlm.nih.gov/36259389 https://pubmed.ncbi.nlm.nih.gov/36042458 https://pubmed.ncbi.nlm.nih.gov/36029111 https://pubmed.ncbi.nlm.nih.gov/36012197 https://pubmed.ncbi.nlm.nih.gov/35962550 https://pubmed.ncbi.nlm.nih.go…	https://pubmed.ncbi.nlm.nih.gov/36672942 https://pubmed.ncbi.nlm.nih.gov/36660621 https://pubmed.ncbi.nlm.nih.gov/36653852 https://pubmed.ncbi.nlm.nih.gov/36613515 https://pubmed.ncbi.nlm.nih.gov/36610451 https://pubmed.ncbi.nlm.nih.gov/36604653 https://pubmed.ncbi.nlm.nih.gov/36575883 https://pubmed.ncbi.nlm.nih.gov/36542547 https://pubmed.ncbi.nlm.nih.gov/36523511 https://pubmed.ncbi.nlm.nih.go…
ENSG00000111058	ACSS3	270.535	-2.76892	3.0854e-14	8.99622e-12	Y	acyl-CoA synthetase short chain family member 3		acyl-CoA synthetase short-chain family member 3, mitochondrial|AMP-binding enzyme, 33217|acetate--CoA ligase 3|propionate--CoA ligase	acyl-CoA synthetase short chain family member 3	https://www.ensembl.org/Homo_sapiens/Gene/ExpressionAtlas?g=ENSG00000111058	http://www.ensembl.org/id/ENSG00000111058	https://www.ncbi.nlm.nih.gov/gene?term=(ACSS3[Gene Name]) AND Homo sapiens[Organism]	https://pubmed.ncbi.nlm.nih.gov/34368281 https://pubmed.ncbi.nlm.nih.gov/33391508 https://pubmed.ncbi.nlm.nih.gov/33383577 https://pubmed.ncbi.nlm.nih.gov/32147245 https://pubmed.ncbi.nlm.nih.gov/30718454 https://pubmed.ncbi.nlm.nih.gov/30482855 https://pubmed.ncbi.nlm.nih.gov/29493120 https://pubmed.ncbi.nlm.nih.gov/28550509 https://pubmed.ncbi.nlm.nih.gov/28003429 https://pubmed.ncbi.nlm.nih.go…	https://pubmed.ncbi.nlm.nih.gov/34368281 https://pubmed.ncbi.nlm.nih.gov/33391508 https://pubmed.ncbi.nlm.nih.gov/33383577 https://pubmed.ncbi.nlm.nih.gov/32147245 https://pubmed.ncbi.nlm.nih.gov/30718454 https://pubmed.ncbi.nlm.nih.gov/30482855 https://pubmed.ncbi.nlm.nih.gov/29493120 https://pubmed.ncbi.nlm.nih.gov/28550509 https://pubmed.ncbi.nlm.nih.gov/28003429 https://pubmed.ncbi.nlm.nih.go…	https://pubmed.ncbi.nlm.nih.gov/36583723 https://pubmed.ncbi.nlm.nih.gov/36510703 https://pubmed.ncbi.nlm.nih.gov/35989547 https://pubmed.ncbi.nlm.nih.gov/35502666 https://pubmed.ncbi.nlm.nih.gov/35184387 https://pubmed.ncbi.nlm.nih.gov/34368281 https://pubmed.ncbi.nlm.nih.gov/33391508 https://pubmed.ncbi.nlm.nih.gov/33383577 https://pubmed.ncbi.nlm.nih.gov/32536985 https://pubmed.ncbi.nlm.nih.go…
ENSG00000064042	LIMCH1	158.194	-3.1832	4.75628e-14	1.36159e-11	Y	LIM and calponin homology domains 1	LIMCH1A, LMO7B	LIM and calponin homology domains-containing protein 1	LIM and calponin homology domains 1	https://www.ensembl.org/Homo_sapiens/Gene/ExpressionAtlas?g=ENSG00000064042	http://www.ensembl.org/id/ENSG00000064042	https://www.ncbi.nlm.nih.gov/gene?term=(LIMCH1[Gene Name]) AND Homo sapiens[Organism]	https://pubmed.ncbi.nlm.nih.gov/36474270 https://pubmed.ncbi.nlm.nih.gov/36444609 https://pubmed.ncbi.nlm.nih.gov/34242216 https://pubmed.ncbi.nlm.nih.gov/34096174 https://pubmed.ncbi.nlm.nih.gov/33723390 https://pubmed.ncbi.nlm.nih.gov/33059953 https://pubmed.ncbi.nlm.nih.gov/31959624 https://pubmed.ncbi.nlm.nih.gov/31279706 https://pubmed.ncbi.nlm.nih.gov/31174455 https://pubmed.ncbi.nlm.nih.go…	https://pubmed.ncbi.nlm.nih.gov/36474270 https://pubmed.ncbi.nlm.nih.gov/36444609 https://pubmed.ncbi.nlm.nih.gov/34242216 https://pubmed.ncbi.nlm.nih.gov/34096174 https://pubmed.ncbi.nlm.nih.gov/33723390 https://pubmed.ncbi.nlm.nih.gov/33059953 https://pubmed.ncbi.nlm.nih.gov/31959624 https://pubmed.ncbi.nlm.nih.gov/31279706 https://pubmed.ncbi.nlm.nih.gov/31174455 https://pubmed.ncbi.nlm.nih.go…	https://pubmed.ncbi.nlm.nih.gov/36474270 https://pubmed.ncbi.nlm.nih.gov/36444609 https://pubmed.ncbi.nlm.nih.gov/36338962 https://pubmed.ncbi.nlm.nih.gov/36180966 https://pubmed.ncbi.nlm.nih.gov/35565241 https://pubmed.ncbi.nlm.nih.gov/34885095 https://pubmed.ncbi.nlm.nih.gov/34392541 https://pubmed.ncbi.nlm.nih.gov/34242216 https://pubmed.ncbi.nlm.nih.gov/34202351 https://pubmed.ncbi.nlm.nih.go…
ENSG00000173546	CSPG4	2201.61	2.3328	6.03271e-14	1.69616e-11	Y	chondroitin sulfate proteoglycan 4	CSPG4A, HMW-MAA, MCSP, MCSPG, MEL-CSPG, MSK16, NG2	chondroitin sulfate proteoglycan 4|chondroitin sulfate proteoglycan 4 (melanoma-associated)|chondroitin sulfate proteoglycan NG2|melanoma chondroitin sulfate proteoglycan|melanoma-associated chondroitin sulfate proteoglycan	chondroitin sulfate proteoglycan 4	https://www.ensembl.org/Homo_sapiens/Gene/ExpressionAtlas?g=ENSG00000173546	http://www.ensembl.org/id/ENSG00000173546	https://www.ncbi.nlm.nih.gov/gene?term=(CSPG4[Gene Name]) AND Homo sapiens[Organism]	https://pubmed.ncbi.nlm.nih.gov/36422502 https://pubmed.ncbi.nlm.nih.gov/36362241 https://pubmed.ncbi.nlm.nih.gov/36292695 https://pubmed.ncbi.nlm.nih.gov/36221119 https://pubmed.ncbi.nlm.nih.gov/36012380 https://pubmed.ncbi.nlm.nih.gov/35733147 https://pubmed.ncbi.nlm.nih.gov/35580930 https://pubmed.ncbi.nlm.nih.gov/35547747 https://pubmed.ncbi.nlm.nih.gov/35526762 https://pubmed.ncbi.nlm.nih.go…	https://pubmed.ncbi.nlm.nih.gov/36422502 https://pubmed.ncbi.nlm.nih.gov/36362241 https://pubmed.ncbi.nlm.nih.gov/36292695 https://pubmed.ncbi.nlm.nih.gov/36221119 https://pubmed.ncbi.nlm.nih.gov/36012380 https://pubmed.ncbi.nlm.nih.gov/35733147 https://pubmed.ncbi.nlm.nih.gov/35580930 https://pubmed.ncbi.nlm.nih.gov/35547747 https://pubmed.ncbi.nlm.nih.gov/35526762 https://pubmed.ncbi.nlm.nih.go…	https://pubmed.ncbi.nlm.nih.gov/36674693 https://pubmed.ncbi.nlm.nih.gov/36658473 https://pubmed.ncbi.nlm.nih.gov/36646769 https://pubmed.ncbi.nlm.nih.gov/36634519 https://pubmed.ncbi.nlm.nih.gov/36556464 https://pubmed.ncbi.nlm.nih.gov/36524724 https://pubmed.ncbi.nlm.nih.gov/36445780 https://pubmed.ncbi.nlm.nih.gov/36428658 https://pubmed.ncbi.nlm.nih.gov/36422502 https://pubmed.ncbi.nlm.nih.go…
ENSG00000100311	PDGFB	89.0414	-4.22233	6.51712e-14	1.79876e-11	Y	platelet derived growth factor subunit B	IBGC5, PDGF-2, PDGF2, SIS, SSV, c-sis	platelet-derived growth factor subunit B|PDGF subunit B|PDGF, B chain|becaplermin|epididymis secretory sperm binding protein|platelet-derived growth factor 2|platelet-derived growth factor B chain|platelet-derived growth factor beta polypeptide (simian sarcoma viral (v-sis) oncogene homolog)|platelet-derived growth factor, beta polypeptide (oncogene SIS)|proto-oncogene c-Sis	platelet derived growth factor subunit B	https://www.ensembl.org/Homo_sapiens/Gene/ExpressionAtlas?g=ENSG00000100311	http://www.ensembl.org/id/ENSG00000100311	https://www.ncbi.nlm.nih.gov/gene?term=(PDGFB[Gene Name]) AND Homo sapiens[Organism]	https://pubmed.ncbi.nlm.nih.gov/36617900 https://pubmed.ncbi.nlm.nih.gov/36615214 https://pubmed.ncbi.nlm.nih.gov/36609374 https://pubmed.ncbi.nlm.nih.gov/36566916 https://pubmed.ncbi.nlm.nih.gov/36551295 https://pubmed.ncbi.nlm.nih.gov/36542130 https://pubmed.ncbi.nlm.nih.gov/36539110 https://pubmed.ncbi.nlm.nih.gov/36476912 https://pubmed.ncbi.nlm.nih.gov/36459771 https://pubmed.ncbi.nlm.nih.go…	https://pubmed.ncbi.nlm.nih.gov/36617900 https://pubmed.ncbi.nlm.nih.gov/36615214 https://pubmed.ncbi.nlm.nih.gov/36609374 https://pubmed.ncbi.nlm.nih.gov/36566916 https://pubmed.ncbi.nlm.nih.gov/36551295 https://pubmed.ncbi.nlm.nih.gov/36542130 https://pubmed.ncbi.nlm.nih.gov/36539110 https://pubmed.ncbi.nlm.nih.gov/36476912 https://pubmed.ncbi.nlm.nih.gov/36459771 https://pubmed.ncbi.nlm.nih.go…	https://pubmed.ncbi.nlm.nih.gov/36670922 https://pubmed.ncbi.nlm.nih.gov/36630365 https://pubmed.ncbi.nlm.nih.gov/36617900 https://pubmed.ncbi.nlm.nih.gov/36615214 https://pubmed.ncbi.nlm.nih.gov/36614910 https://pubmed.ncbi.nlm.nih.gov/36609374 https://pubmed.ncbi.nlm.nih.gov/36591963 https://pubmed.ncbi.nlm.nih.gov/36572069 https://pubmed.ncbi.nlm.nih.gov/36566916 https://pubmed.ncbi.nlm.nih.go…
ENSG00000149596	JPH2	271.429	-2.74231	6.6261e-14	1.79876e-11	Y	junctophilin 2	CMD2E, CMH17, JP-2, JP2	junctophilin-2|junctophilin type 2	junctophilin 2	https://www.ensembl.org/Homo_sapiens/Gene/ExpressionAtlas?g=ENSG00000149596	http://www.ensembl.org/id/ENSG00000149596	https://www.ncbi.nlm.nih.gov/gene?term=(JPH2[Gene Name]) AND Homo sapiens[Organism]	https://pubmed.ncbi.nlm.nih.gov/36357925 https://pubmed.ncbi.nlm.nih.gov/36129056 https://pubmed.ncbi.nlm.nih.gov/35238659 https://pubmed.ncbi.nlm.nih.gov/35089322 https://pubmed.ncbi.nlm.nih.gov/35001666 https://pubmed.ncbi.nlm.nih.gov/34965474 https://pubmed.ncbi.nlm.nih.gov/34861382 https://pubmed.ncbi.nlm.nih.gov/34780259 https://pubmed.ncbi.nlm.nih.gov/34526680 https://pubmed.ncbi.nlm.nih.go…	https://pubmed.ncbi.nlm.nih.gov/36357925 https://pubmed.ncbi.nlm.nih.gov/36129056 https://pubmed.ncbi.nlm.nih.gov/35238659 https://pubmed.ncbi.nlm.nih.gov/35089322 https://pubmed.ncbi.nlm.nih.gov/35001666 https://pubmed.ncbi.nlm.nih.gov/34965474 https://pubmed.ncbi.nlm.nih.gov/34861382 https://pubmed.ncbi.nlm.nih.gov/34780259 https://pubmed.ncbi.nlm.nih.gov/34526680 https://pubmed.ncbi.nlm.nih.go…	https://pubmed.ncbi.nlm.nih.gov/36674797 https://pubmed.ncbi.nlm.nih.gov/36357925 https://pubmed.ncbi.nlm.nih.gov/36189802 https://pubmed.ncbi.nlm.nih.gov/36129056 https://pubmed.ncbi.nlm.nih.gov/35800456 https://pubmed.ncbi.nlm.nih.gov/35665900 https://pubmed.ncbi.nlm.nih.gov/35416176 https://pubmed.ncbi.nlm.nih.gov/35238659 https://pubmed.ncbi.nlm.nih.gov/35089322 https://pubmed.ncbi.nlm.nih.go…
ENSG00000168685	IL7R	184.418	-3.29467	7.79879e-14	2.08122e-11	Y	interleukin 7 receptor	CD127, CDW127, IL-7R-alpha, IL7RA, ILRA, IMD104, lnc-IL7R	interleukin-7 receptor subunit alpha|CD127 antigen|IL-7 receptor subunit alpha|IL-7R subunit alpha|interleukin 7 receptor alpha chain	interleukin 7 receptor	https://www.ensembl.org/Homo_sapiens/Gene/ExpressionAtlas?g=ENSG00000168685	http://www.ensembl.org/id/ENSG00000168685	https://www.ncbi.nlm.nih.gov/gene?term=(IL7R[Gene Name]) AND Homo sapiens[Organism]	https://pubmed.ncbi.nlm.nih.gov/36514045 https://pubmed.ncbi.nlm.nih.gov/36505431 https://pubmed.ncbi.nlm.nih.gov/36462403 https://pubmed.ncbi.nlm.nih.gov/36438481 https://pubmed.ncbi.nlm.nih.gov/36405756 https://pubmed.ncbi.nlm.nih.gov/36403042 https://pubmed.ncbi.nlm.nih.gov/36384102 https://pubmed.ncbi.nlm.nih.gov/36311761 https://pubmed.ncbi.nlm.nih.gov/36210698 https://pubmed.ncbi.nlm.nih.go…	https://pubmed.ncbi.nlm.nih.gov/36514045 https://pubmed.ncbi.nlm.nih.gov/36505431 https://pubmed.ncbi.nlm.nih.gov/36462403 https://pubmed.ncbi.nlm.nih.gov/36438481 https://pubmed.ncbi.nlm.nih.gov/36405756 https://pubmed.ncbi.nlm.nih.gov/36403042 https://pubmed.ncbi.nlm.nih.gov/36384102 https://pubmed.ncbi.nlm.nih.gov/36311761 https://pubmed.ncbi.nlm.nih.gov/36210698 https://pubmed.ncbi.nlm.nih.go…	https://pubmed.ncbi.nlm.nih.gov/36672735 https://pubmed.ncbi.nlm.nih.gov/36672342 https://pubmed.ncbi.nlm.nih.gov/36655999 https://pubmed.ncbi.nlm.nih.gov/36653901 https://pubmed.ncbi.nlm.nih.gov/36611783 https://pubmed.ncbi.nlm.nih.gov/36610264 https://pubmed.ncbi.nlm.nih.gov/36592421 https://pubmed.ncbi.nlm.nih.gov/36570506 https://pubmed.ncbi.nlm.nih.gov/36561317 https://pubmed.ncbi.nlm.nih.go…
ENSG00000182253	SYNM	1019.33	-2.10004	9.63594e-14	2.52863e-11	Y	synemin	DMN, SYN	synemin|desmuslin|synemin alpha|synemin beta|synemin, intermediate filament protein	synemin	https://www.ensembl.org/Homo_sapiens/Gene/ExpressionAtlas?g=ENSG00000182253	http://www.ensembl.org/id/ENSG00000182253	https://www.ncbi.nlm.nih.gov/gene?term=(SYNM[Gene Name]) AND Homo sapiens[Organism]	https://pubmed.ncbi.nlm.nih.gov/36404510 https://pubmed.ncbi.nlm.nih.gov/35607268 https://pubmed.ncbi.nlm.nih.gov/35361267 https://pubmed.ncbi.nlm.nih.gov/34856364 https://pubmed.ncbi.nlm.nih.gov/34541834 https://pubmed.ncbi.nlm.nih.gov/33923914 https://pubmed.ncbi.nlm.nih.gov/33622391 https://pubmed.ncbi.nlm.nih.gov/32023076 https://pubmed.ncbi.nlm.nih.gov/31461342 https://pubmed.ncbi.nlm.nih.go…	https://pubmed.ncbi.nlm.nih.gov/36404510 https://pubmed.ncbi.nlm.nih.gov/35607268 https://pubmed.ncbi.nlm.nih.gov/35361267 https://pubmed.ncbi.nlm.nih.gov/34856364 https://pubmed.ncbi.nlm.nih.gov/34541834 https://pubmed.ncbi.nlm.nih.gov/33923914 https://pubmed.ncbi.nlm.nih.gov/33622391 https://pubmed.ncbi.nlm.nih.gov/32023076 https://pubmed.ncbi.nlm.nih.gov/31461342 https://pubmed.ncbi.nlm.nih.go…	https://pubmed.ncbi.nlm.nih.gov/36587284 https://pubmed.ncbi.nlm.nih.gov/36529951 https://pubmed.ncbi.nlm.nih.gov/36404510 https://pubmed.ncbi.nlm.nih.gov/35607268 https://pubmed.ncbi.nlm.nih.gov/35361267 https://pubmed.ncbi.nlm.nih.gov/34856364 https://pubmed.ncbi.nlm.nih.gov/34541834 https://pubmed.ncbi.nlm.nih.gov/34400333 https://pubmed.ncbi.nlm.nih.gov/33923914 https://pubmed.ncbi.nlm.nih.go…
ENSG00000078401	EDN1	142.327	-3.70701	1.00279e-13	2.58836e-11	Y	endothelin 1	ARCND3, ET1, HDLCQ7, PPET1, QME	endothelin-1|preproendothelin-1	endothelin 1	https://www.ensembl.org/Homo_sapiens/Gene/ExpressionAtlas?g=ENSG00000078401	http://www.ensembl.org/id/ENSG00000078401	https://www.ncbi.nlm.nih.gov/gene?term=(EDN1[Gene Name]) AND Homo sapiens[Organism]	https://pubmed.ncbi.nlm.nih.gov/36581343 https://pubmed.ncbi.nlm.nih.gov/36544188 https://pubmed.ncbi.nlm.nih.gov/36502440 https://pubmed.ncbi.nlm.nih.gov/36499658 https://pubmed.ncbi.nlm.nih.gov/36453252 https://pubmed.ncbi.nlm.nih.gov/36343795 https://pubmed.ncbi.nlm.nih.gov/36141455 https://pubmed.ncbi.nlm.nih.gov/36053810 https://pubmed.ncbi.nlm.nih.gov/35899934 https://pubmed.ncbi.nlm.nih.go…	https://pubmed.ncbi.nlm.nih.gov/36581343 https://pubmed.ncbi.nlm.nih.gov/36544188 https://pubmed.ncbi.nlm.nih.gov/36502440 https://pubmed.ncbi.nlm.nih.gov/36499658 https://pubmed.ncbi.nlm.nih.gov/36453252 https://pubmed.ncbi.nlm.nih.gov/36343795 https://pubmed.ncbi.nlm.nih.gov/36141455 https://pubmed.ncbi.nlm.nih.gov/36053810 https://pubmed.ncbi.nlm.nih.gov/35899934 https://pubmed.ncbi.nlm.nih.go…	https://pubmed.ncbi.nlm.nih.gov/36675322 https://pubmed.ncbi.nlm.nih.gov/36606257 https://pubmed.ncbi.nlm.nih.gov/36581343 https://pubmed.ncbi.nlm.nih.gov/36544188 https://pubmed.ncbi.nlm.nih.gov/36542159 https://pubmed.ncbi.nlm.nih.gov/36532492 https://pubmed.ncbi.nlm.nih.gov/36532069 https://pubmed.ncbi.nlm.nih.gov/36502440 https://pubmed.ncbi.nlm.nih.gov/36499658 https://pubmed.ncbi.nlm.nih.go…
ENSG00000178726	THBD	378.332	2.9192	1.08301e-13	2.75031e-11	Y	thrombomodulin	AHUS6, BDCA-3, BDCA3, CD141, THPH12, THRM, TM	thrombomodulin|CD141 antigen|fetomodulin	thrombomodulin	https://www.ensembl.org/Homo_sapiens/Gene/ExpressionAtlas?g=ENSG00000178726	http://www.ensembl.org/id/ENSG00000178726	https://www.ncbi.nlm.nih.gov/gene?term=(THBD[Gene Name]) AND Homo sapiens[Organism]	https://pubmed.ncbi.nlm.nih.gov/36462734 https://pubmed.ncbi.nlm.nih.gov/36161694 https://pubmed.ncbi.nlm.nih.gov/35872006 https://pubmed.ncbi.nlm.nih.gov/35844613 https://pubmed.ncbi.nlm.nih.gov/35717947 https://pubmed.ncbi.nlm.nih.gov/35654592 https://pubmed.ncbi.nlm.nih.gov/35619721 https://pubmed.ncbi.nlm.nih.gov/35587845 https://pubmed.ncbi.nlm.nih.gov/35580466 https://pubmed.ncbi.nlm.nih.go…	https://pubmed.ncbi.nlm.nih.gov/36462734 https://pubmed.ncbi.nlm.nih.gov/36161694 https://pubmed.ncbi.nlm.nih.gov/35872006 https://pubmed.ncbi.nlm.nih.gov/35844613 https://pubmed.ncbi.nlm.nih.gov/35717947 https://pubmed.ncbi.nlm.nih.gov/35654592 https://pubmed.ncbi.nlm.nih.gov/35619721 https://pubmed.ncbi.nlm.nih.gov/35587845 https://pubmed.ncbi.nlm.nih.gov/35580466 https://pubmed.ncbi.nlm.nih.go…	https://pubmed.ncbi.nlm.nih.gov/36622444 https://pubmed.ncbi.nlm.nih.gov/36462734 https://pubmed.ncbi.nlm.nih.gov/36284631 https://pubmed.ncbi.nlm.nih.gov/36278273 https://pubmed.ncbi.nlm.nih.gov/36246703 https://pubmed.ncbi.nlm.nih.gov/36226612 https://pubmed.ncbi.nlm.nih.gov/36162255 https://pubmed.ncbi.nlm.nih.gov/36161694 https://pubmed.ncbi.nlm.nih.gov/36028345 https://pubmed.ncbi.nlm.nih.go…
ENSG00000112715	VEGFA	4261.21	2.34514	1.81097e-13	4.526e-11	Y	vascular endothelial growth factor A	MVCD1, VEGF, VPF	vascular endothelial growth factor A|vascular endothelial growth factor A121|vascular endothelial growth factor A165|vascular permeability factor	vascular endothelial growth factor A	https://www.ensembl.org/Homo_sapiens/Gene/ExpressionAtlas?g=ENSG00000112715	http://www.ensembl.org/id/ENSG00000112715	https://www.ncbi.nlm.nih.gov/gene?term=(VEGFA[Gene Name]) AND Homo sapiens[Organism]	https://pubmed.ncbi.nlm.nih.gov/36653359 https://pubmed.ncbi.nlm.nih.gov/36649044 https://pubmed.ncbi.nlm.nih.gov/36647156 https://pubmed.ncbi.nlm.nih.gov/36639616 https://pubmed.ncbi.nlm.nih.gov/36626454 https://pubmed.ncbi.nlm.nih.gov/36626429 https://pubmed.ncbi.nlm.nih.gov/36624939 https://pubmed.ncbi.nlm.nih.gov/36619896 https://pubmed.ncbi.nlm.nih.gov/36618348 https://pubmed.ncbi.nlm.nih.go…	https://pubmed.ncbi.nlm.nih.gov/36653359 https://pubmed.ncbi.nlm.nih.gov/36649044 https://pubmed.ncbi.nlm.nih.gov/36647156 https://pubmed.ncbi.nlm.nih.gov/36639616 https://pubmed.ncbi.nlm.nih.gov/36626454 https://pubmed.ncbi.nlm.nih.gov/36626429 https://pubmed.ncbi.nlm.nih.gov/36624939 https://pubmed.ncbi.nlm.nih.gov/36619896 https://pubmed.ncbi.nlm.nih.gov/36618348 https://pubmed.ncbi.nlm.nih.go…	https://pubmed.ncbi.nlm.nih.gov/36678795 https://pubmed.ncbi.nlm.nih.gov/36675700 https://pubmed.ncbi.nlm.nih.gov/36674749 https://pubmed.ncbi.nlm.nih.gov/36673046 https://pubmed.ncbi.nlm.nih.gov/36672695 https://pubmed.ncbi.nlm.nih.gov/36672201 https://pubmed.ncbi.nlm.nih.gov/36672132 https://pubmed.ncbi.nlm.nih.gov/36671483 https://pubmed.ncbi.nlm.nih.gov/36670362 https://pubmed.ncbi.nlm.nih.go…
ENSG00000164236	ANKRD33B	395.356	-2.34465	2.22886e-13	5.48334e-11	Y	ankyrin repeat domain 33B		ankyrin repeat domain-containing protein 33B|Ankyrin repeat domain-containing protein LOC651746	ankyrin repeat domain 33B	https://www.ensembl.org/Homo_sapiens/Gene/ExpressionAtlas?g=ENSG00000164236	http://www.ensembl.org/id/ENSG00000164236	https://www.ncbi.nlm.nih.gov/gene?term=(ANKRD33B[Gene Name]) AND Homo sapiens[Organism]	https://pubmed.ncbi.nlm.nih.gov/34155937 https://pubmed.ncbi.nlm.nih.gov/25482056	https://pubmed.ncbi.nlm.nih.gov/34155937 https://pubmed.ncbi.nlm.nih.gov/25482056	https://pubmed.ncbi.nlm.nih.gov/34155937 https://pubmed.ncbi.nlm.nih.gov/25482056
ENSG00000139970	RTN1	824.048	-2.13977	3.18279e-13	7.59288e-11	Y	reticulon 1	NSP	reticulon-1|neuroendocrine-specific protein	reticulon 1	https://www.ensembl.org/Homo_sapiens/Gene/ExpressionAtlas?g=ENSG00000139970	http://www.ensembl.org/id/ENSG00000139970	https://www.ncbi.nlm.nih.gov/gene?term=(RTN1[Gene Name]) AND Homo sapiens[Organism]	https://pubmed.ncbi.nlm.nih.gov/36223176 https://pubmed.ncbi.nlm.nih.gov/35804263 https://pubmed.ncbi.nlm.nih.gov/35747917 https://pubmed.ncbi.nlm.nih.gov/35469894 https://pubmed.ncbi.nlm.nih.gov/34920184 https://pubmed.ncbi.nlm.nih.gov/34702929 https://pubmed.ncbi.nlm.nih.gov/34062006 https://pubmed.ncbi.nlm.nih.gov/33713320 https://pubmed.ncbi.nlm.nih.gov/32690699 https://pubmed.ncbi.nlm.nih.go…	https://pubmed.ncbi.nlm.nih.gov/36223176 https://pubmed.ncbi.nlm.nih.gov/35804263 https://pubmed.ncbi.nlm.nih.gov/35747917 https://pubmed.ncbi.nlm.nih.gov/35469894 https://pubmed.ncbi.nlm.nih.gov/34920184 https://pubmed.ncbi.nlm.nih.gov/34702929 https://pubmed.ncbi.nlm.nih.gov/34062006 https://pubmed.ncbi.nlm.nih.gov/33713320 https://pubmed.ncbi.nlm.nih.gov/32690699 https://pubmed.ncbi.nlm.nih.go…	https://pubmed.ncbi.nlm.nih.gov/36605552 https://pubmed.ncbi.nlm.nih.gov/36263427 https://pubmed.ncbi.nlm.nih.gov/36254251 https://pubmed.ncbi.nlm.nih.gov/36223176 https://pubmed.ncbi.nlm.nih.gov/36213995 https://pubmed.ncbi.nlm.nih.gov/36048753 https://pubmed.ncbi.nlm.nih.gov/35804263 https://pubmed.ncbi.nlm.nih.gov/35747917 https://pubmed.ncbi.nlm.nih.gov/35476214 https://pubmed.ncbi.nlm.nih.go…
ENSG00000196517	SLC6A9	177.469	2.73936	3.61004e-13	8.48359e-11	Y	solute carrier family 6 member 9	GCENSG, GLYT1	sodium- and chloride-dependent glycine transporter 1|glyT-1|solute carrier family 6 (neurotransmitter transporter, glycine), member 9	solute carrier family 6 member 9	https://www.ensembl.org/Homo_sapiens/Gene/ExpressionAtlas?g=ENSG00000196517	http://www.ensembl.org/id/ENSG00000196517	https://www.ncbi.nlm.nih.gov/gene?term=(SLC6A9[Gene Name]) AND Homo sapiens[Organism]	https://pubmed.ncbi.nlm.nih.gov/36195292 https://pubmed.ncbi.nlm.nih.gov/35817773 https://pubmed.ncbi.nlm.nih.gov/34174033 https://pubmed.ncbi.nlm.nih.gov/33931857 https://pubmed.ncbi.nlm.nih.gov/33756123 https://pubmed.ncbi.nlm.nih.gov/33658720 https://pubmed.ncbi.nlm.nih.gov/33658361 https://pubmed.ncbi.nlm.nih.gov/33269555 https://pubmed.ncbi.nlm.nih.gov/33227791 https://pubmed.ncbi.nlm.nih.go…	https://pubmed.ncbi.nlm.nih.gov/36195292 https://pubmed.ncbi.nlm.nih.gov/35817773 https://pubmed.ncbi.nlm.nih.gov/34174033 https://pubmed.ncbi.nlm.nih.gov/33931857 https://pubmed.ncbi.nlm.nih.gov/33756123 https://pubmed.ncbi.nlm.nih.gov/33658720 https://pubmed.ncbi.nlm.nih.gov/33658361 https://pubmed.ncbi.nlm.nih.gov/33269555 https://pubmed.ncbi.nlm.nih.gov/33227791 https://pubmed.ncbi.nlm.nih.go…	https://pubmed.ncbi.nlm.nih.gov/36528129 https://pubmed.ncbi.nlm.nih.gov/36415754 https://pubmed.ncbi.nlm.nih.gov/36233781 https://pubmed.ncbi.nlm.nih.gov/36195292 https://pubmed.ncbi.nlm.nih.gov/36191186 https://pubmed.ncbi.nlm.nih.gov/36091765 https://pubmed.ncbi.nlm.nih.gov/36076729 https://pubmed.ncbi.nlm.nih.gov/35817773 https://pubmed.ncbi.nlm.nih.gov/35454963 https://pubmed.ncbi.nlm.nih.go…
ENSG00000185950	IRS2	261.224	-2.51216	3.80787e-13	8.81689e-11	Y	insulin receptor substrate 2	IRS-2	insulin receptor substrate 2	insulin receptor substrate 2	https://www.ensembl.org/Homo_sapiens/Gene/ExpressionAtlas?g=ENSG00000185950	http://www.ensembl.org/id/ENSG00000185950	https://www.ncbi.nlm.nih.gov/gene?term=(IRS2[Gene Name]) AND Homo sapiens[Organism]	https://pubmed.ncbi.nlm.nih.gov/36631465 https://pubmed.ncbi.nlm.nih.gov/36624375 https://pubmed.ncbi.nlm.nih.gov/36572904 https://pubmed.ncbi.nlm.nih.gov/36325267 https://pubmed.ncbi.nlm.nih.gov/36246878 https://pubmed.ncbi.nlm.nih.gov/36224313 https://pubmed.ncbi.nlm.nih.gov/36217412 https://pubmed.ncbi.nlm.nih.gov/36140796 https://pubmed.ncbi.nlm.nih.gov/36054916 https://pubmed.ncbi.nlm.nih.go…	https://pubmed.ncbi.nlm.nih.gov/36631465 https://pubmed.ncbi.nlm.nih.gov/36624375 https://pubmed.ncbi.nlm.nih.gov/36572904 https://pubmed.ncbi.nlm.nih.gov/36325267 https://pubmed.ncbi.nlm.nih.gov/36246878 https://pubmed.ncbi.nlm.nih.gov/36224313 https://pubmed.ncbi.nlm.nih.gov/36217412 https://pubmed.ncbi.nlm.nih.gov/36140796 https://pubmed.ncbi.nlm.nih.gov/36054916 https://pubmed.ncbi.nlm.nih.go…	https://pubmed.ncbi.nlm.nih.gov/36678614 https://pubmed.ncbi.nlm.nih.gov/36672909 https://pubmed.ncbi.nlm.nih.gov/36652785 https://pubmed.ncbi.nlm.nih.gov/36631465 https://pubmed.ncbi.nlm.nih.gov/36624375 https://pubmed.ncbi.nlm.nih.gov/36600115 https://pubmed.ncbi.nlm.nih.gov/36592823 https://pubmed.ncbi.nlm.nih.gov/36572904 https://pubmed.ncbi.nlm.nih.gov/36509718 https://pubmed.ncbi.nlm.nih.go…
ENSG00000196562	SULF2	3943.72	-2.35572	4.42566e-13	1.00988e-10	Y	sulfatase 2	HSULF-2	extracellular sulfatase Sulf-2	sulfatase 2	https://www.ensembl.org/Homo_sapiens/Gene/ExpressionAtlas?g=ENSG00000196562	http://www.ensembl.org/id/ENSG00000196562	https://www.ncbi.nlm.nih.gov/gene?term=(SULF2[Gene Name]) AND Homo sapiens[Organism]	https://pubmed.ncbi.nlm.nih.gov/36195266 https://pubmed.ncbi.nlm.nih.gov/36167820 https://pubmed.ncbi.nlm.nih.gov/36068294 https://pubmed.ncbi.nlm.nih.gov/36018447 https://pubmed.ncbi.nlm.nih.gov/35472437 https://pubmed.ncbi.nlm.nih.gov/35294879 https://pubmed.ncbi.nlm.nih.gov/35259473 https://pubmed.ncbi.nlm.nih.gov/35131262 https://pubmed.ncbi.nlm.nih.gov/34789772 https://pubmed.ncbi.nlm.nih.go…	https://pubmed.ncbi.nlm.nih.gov/36195266 https://pubmed.ncbi.nlm.nih.gov/36167820 https://pubmed.ncbi.nlm.nih.gov/36068294 https://pubmed.ncbi.nlm.nih.gov/36018447 https://pubmed.ncbi.nlm.nih.gov/35472437 https://pubmed.ncbi.nlm.nih.gov/35294879 https://pubmed.ncbi.nlm.nih.gov/35259473 https://pubmed.ncbi.nlm.nih.gov/35131262 https://pubmed.ncbi.nlm.nih.gov/34789772 https://pubmed.ncbi.nlm.nih.go…	https://pubmed.ncbi.nlm.nih.gov/36612128 https://pubmed.ncbi.nlm.nih.gov/36597436 https://pubmed.ncbi.nlm.nih.gov/36589727 https://pubmed.ncbi.nlm.nih.gov/36428645 https://pubmed.ncbi.nlm.nih.gov/36195266 https://pubmed.ncbi.nlm.nih.gov/36167820 https://pubmed.ncbi.nlm.nih.gov/36068294 https://pubmed.ncbi.nlm.nih.gov/36018447 https://pubmed.ncbi.nlm.nih.gov/35910734 https://pubmed.ncbi.nlm.nih.go…
ENSG00000269927	AC004817.3	71.2358	4.11301	4.55612e-13	1.0248e-10	Y					https://www.ensembl.org/Homo_sapiens/Gene/ExpressionAtlas?g=ENSG00000269927	http://www.ensembl.org/id/ENSG00000269927	https://www.ncbi.nlm.nih.gov/gene?term=(AC004817.3[Gene Name]) AND Homo sapiens[Organism]
ENSG00000159899	NPR2	221.254	2.51192	7.87071e-13	1.74541e-10	Y	natriuretic peptide receptor 2	AMD1, AMDM, ANPRB, ANPb, ECDM, GC-B, GCB, GUC2B, GUCY2B, NPRB, NPRBi, SNSK	atrial natriuretic peptide receptor 2|atrial natriuretic peptide B-type receptor|atrial natriuretic peptide receptor type B|guanylate cyclase 2B|guanylate cyclase B|guanylyl cyclase B|natriuretic peptide receptor B/guanylate cyclase B (atrionatriuretic peptide receptor B)	natriuretic peptide receptor 2	https://www.ensembl.org/Homo_sapiens/Gene/ExpressionAtlas?g=ENSG00000159899	http://www.ensembl.org/id/ENSG00000159899	https://www.ncbi.nlm.nih.gov/gene?term=(NPR2[Gene Name]) AND Homo sapiens[Organism]	https://pubmed.ncbi.nlm.nih.gov/36368115 https://pubmed.ncbi.nlm.nih.gov/36322898 https://pubmed.ncbi.nlm.nih.gov/36071494 https://pubmed.ncbi.nlm.nih.gov/35741827 https://pubmed.ncbi.nlm.nih.gov/35455946 https://pubmed.ncbi.nlm.nih.gov/35440867 https://pubmed.ncbi.nlm.nih.gov/35250876 https://pubmed.ncbi.nlm.nih.gov/35209923 https://pubmed.ncbi.nlm.nih.gov/35120671 https://pubmed.ncbi.nlm.nih.go…	https://pubmed.ncbi.nlm.nih.gov/36368115 https://pubmed.ncbi.nlm.nih.gov/36322898 https://pubmed.ncbi.nlm.nih.gov/36071494 https://pubmed.ncbi.nlm.nih.gov/35741827 https://pubmed.ncbi.nlm.nih.gov/35455946 https://pubmed.ncbi.nlm.nih.gov/35440867 https://pubmed.ncbi.nlm.nih.gov/35250876 https://pubmed.ncbi.nlm.nih.gov/35209923 https://pubmed.ncbi.nlm.nih.gov/35120671 https://pubmed.ncbi.nlm.nih.go…	https://pubmed.ncbi.nlm.nih.gov/36618828 https://pubmed.ncbi.nlm.nih.gov/36598037 https://pubmed.ncbi.nlm.nih.gov/36396932 https://pubmed.ncbi.nlm.nih.gov/36373817 https://pubmed.ncbi.nlm.nih.gov/36368115 https://pubmed.ncbi.nlm.nih.gov/36340689 https://pubmed.ncbi.nlm.nih.gov/36322898 https://pubmed.ncbi.nlm.nih.gov/36138830 https://pubmed.ncbi.nlm.nih.gov/36093104 https://pubmed.ncbi.nlm.nih.go…
ENSG00000006468	ETV1	464.553	-2.2515	8.48069e-13	1.85456e-10	Y	ETS variant transcription factor 1	ER81	ETS translocation variant 1|ets variant gene 1|ets-related protein 81	ETS variant transcription factor 1	https://www.ensembl.org/Homo_sapiens/Gene/ExpressionAtlas?g=ENSG00000006468	http://www.ensembl.org/id/ENSG00000006468	https://www.ncbi.nlm.nih.gov/gene?term=(ETV1[Gene Name]) AND Homo sapiens[Organism]	https://pubmed.ncbi.nlm.nih.gov/36647117 https://pubmed.ncbi.nlm.nih.gov/36562110 https://pubmed.ncbi.nlm.nih.gov/36494423 https://pubmed.ncbi.nlm.nih.gov/36449109 https://pubmed.ncbi.nlm.nih.gov/36403313 https://pubmed.ncbi.nlm.nih.gov/36383412 https://pubmed.ncbi.nlm.nih.gov/36125519 https://pubmed.ncbi.nlm.nih.gov/36109787 https://pubmed.ncbi.nlm.nih.gov/35860243 https://pubmed.ncbi.nlm.nih.go…	https://pubmed.ncbi.nlm.nih.gov/36647117 https://pubmed.ncbi.nlm.nih.gov/36562110 https://pubmed.ncbi.nlm.nih.gov/36494423 https://pubmed.ncbi.nlm.nih.gov/36449109 https://pubmed.ncbi.nlm.nih.gov/36403313 https://pubmed.ncbi.nlm.nih.gov/36383412 https://pubmed.ncbi.nlm.nih.gov/36125519 https://pubmed.ncbi.nlm.nih.gov/36109787 https://pubmed.ncbi.nlm.nih.gov/35860243 https://pubmed.ncbi.nlm.nih.go…	https://pubmed.ncbi.nlm.nih.gov/36647117 https://pubmed.ncbi.nlm.nih.gov/36562110 https://pubmed.ncbi.nlm.nih.gov/36551682 https://pubmed.ncbi.nlm.nih.gov/36494423 https://pubmed.ncbi.nlm.nih.gov/36449109 https://pubmed.ncbi.nlm.nih.gov/36405929 https://pubmed.ncbi.nlm.nih.gov/36403313 https://pubmed.ncbi.nlm.nih.gov/36388958 https://pubmed.ncbi.nlm.nih.gov/36383412 https://pubmed.ncbi.nlm.nih.go…
ENSG00000145632	PLK2	827.127	-2.00655	8.76915e-13	1.89137e-10	Y	polo like kinase 2	SNK, hPlk2, hSNK	serine/threonine-protein kinase PLK2|PLK-2|serine/threonine-protein kinase SNK|serum-inducible kinase	polo like kinase 2	https://www.ensembl.org/Homo_sapiens/Gene/ExpressionAtlas?g=ENSG00000145632	http://www.ensembl.org/id/ENSG00000145632	https://www.ncbi.nlm.nih.gov/gene?term=(PLK2[Gene Name]) AND Homo sapiens[Organism]	https://pubmed.ncbi.nlm.nih.gov/36646704 https://pubmed.ncbi.nlm.nih.gov/36558006 https://pubmed.ncbi.nlm.nih.gov/36214847 https://pubmed.ncbi.nlm.nih.gov/36206661 https://pubmed.ncbi.nlm.nih.gov/35579380 https://pubmed.ncbi.nlm.nih.gov/35256538 https://pubmed.ncbi.nlm.nih.gov/35029981 https://pubmed.ncbi.nlm.nih.gov/34686664 https://pubmed.ncbi.nlm.nih.gov/34662812 https://pubmed.ncbi.nlm.nih.go…	https://pubmed.ncbi.nlm.nih.gov/36646704 https://pubmed.ncbi.nlm.nih.gov/36558006 https://pubmed.ncbi.nlm.nih.gov/36214847 https://pubmed.ncbi.nlm.nih.gov/36206661 https://pubmed.ncbi.nlm.nih.gov/35579380 https://pubmed.ncbi.nlm.nih.gov/35256538 https://pubmed.ncbi.nlm.nih.gov/35029981 https://pubmed.ncbi.nlm.nih.gov/34686664 https://pubmed.ncbi.nlm.nih.gov/34662812 https://pubmed.ncbi.nlm.nih.go…	https://pubmed.ncbi.nlm.nih.gov/36646704 https://pubmed.ncbi.nlm.nih.gov/36646701 https://pubmed.ncbi.nlm.nih.gov/36558006 https://pubmed.ncbi.nlm.nih.gov/36386842 https://pubmed.ncbi.nlm.nih.gov/36316110 https://pubmed.ncbi.nlm.nih.gov/36267209 https://pubmed.ncbi.nlm.nih.gov/36232565 https://pubmed.ncbi.nlm.nih.gov/36214847 https://pubmed.ncbi.nlm.nih.gov/36209546 https://pubmed.ncbi.nlm.nih.go…
ENSG00000139044	B4GALNT3	292.331	-3.0302	1.02671e-12	2.18454e-10	Y	beta-1,4-N-acetyl-galactosaminyltransferase 3		beta-1,4-N-acetylgalactosaminyltransferase 3|B4GalNAcT3|Beta4GalNAc-T3|N-acetyl-beta-glucosaminyl-glycoprotein 4-beta-N- acetylgalactosaminyltransferase|N-acetyl-beta-glucosaminyl-glycoprotein 4-beta-N-acetylgalactosaminyltransferase 2|NGalNAc-T2|beta-1,4-N-acetyl-galactosaminyl transferase 3|beta-1,4-N-acetylgalactosaminyltransferase III|beta4GalNAcT3	beta-1,4-N-acetyl-galactosaminyltransferase 3	https://www.ensembl.org/Homo_sapiens/Gene/ExpressionAtlas?g=ENSG00000139044	http://www.ensembl.org/id/ENSG00000139044	https://www.ncbi.nlm.nih.gov/gene?term=(B4GALNT3[Gene Name]) AND Homo sapiens[Organism]	https://pubmed.ncbi.nlm.nih.gov/33403396 https://pubmed.ncbi.nlm.nih.gov/33052742 https://pubmed.ncbi.nlm.nih.gov/32937138 https://pubmed.ncbi.nlm.nih.gov/32203219 https://pubmed.ncbi.nlm.nih.gov/32150548 https://pubmed.ncbi.nlm.nih.gov/31170332 https://pubmed.ncbi.nlm.nih.gov/30898876 https://pubmed.ncbi.nlm.nih.gov/28853212 https://pubmed.ncbi.nlm.nih.gov/25803323 https://pubmed.ncbi.nlm.nih.go…	https://pubmed.ncbi.nlm.nih.gov/33403396 https://pubmed.ncbi.nlm.nih.gov/33052742 https://pubmed.ncbi.nlm.nih.gov/32937138 https://pubmed.ncbi.nlm.nih.gov/32203219 https://pubmed.ncbi.nlm.nih.gov/32150548 https://pubmed.ncbi.nlm.nih.gov/31170332 https://pubmed.ncbi.nlm.nih.gov/30898876 https://pubmed.ncbi.nlm.nih.gov/28853212 https://pubmed.ncbi.nlm.nih.gov/25803323 https://pubmed.ncbi.nlm.nih.go…	https://pubmed.ncbi.nlm.nih.gov/36262352 https://pubmed.ncbi.nlm.nih.gov/34975738 https://pubmed.ncbi.nlm.nih.gov/34542150 https://pubmed.ncbi.nlm.nih.gov/33403396 https://pubmed.ncbi.nlm.nih.gov/33052742 https://pubmed.ncbi.nlm.nih.gov/32937138 https://pubmed.ncbi.nlm.nih.gov/32267274 https://pubmed.ncbi.nlm.nih.gov/32203219 https://pubmed.ncbi.nlm.nih.gov/32150548 https://pubmed.ncbi.nlm.nih.go…
ENSG00000078018	MAP2	81.4463	-4.30802	1.14575e-12	2.40531e-10	Y	MBL associated serine protease 2	MAP-2, MAP19, MASP-2, MASP1P1, sMAP	mannan-binding lectin serine protease 2|MBL-associated plasma protein of 19 kD|mannan binding lectin serine peptidase 2|mannan-binding lectin serine peptidase 1 pseudogene 1|mannan-binding lectin serine protease 1 pseudogene 1|mannose-binding lectin associated protein 19|mannose-binding lectin-associated serine protease 2|mannose-binding protein-associated serine protease 2|small MBL-associated p…	MBL associated serine protease 2	https://www.ensembl.org/Homo_sapiens/Gene/ExpressionAtlas?g=ENSG00000078018	http://www.ensembl.org/id/ENSG00000078018	https://www.ncbi.nlm.nih.gov/gene?term=(MAP2[Gene Name]) AND Homo sapiens[Organism]	https://pubmed.ncbi.nlm.nih.gov/36601110 https://pubmed.ncbi.nlm.nih.gov/36566680 https://pubmed.ncbi.nlm.nih.gov/36499116 https://pubmed.ncbi.nlm.nih.gov/36494838 https://pubmed.ncbi.nlm.nih.gov/36481372 https://pubmed.ncbi.nlm.nih.gov/36478139 https://pubmed.ncbi.nlm.nih.gov/36413852 https://pubmed.ncbi.nlm.nih.gov/36410275 https://pubmed.ncbi.nlm.nih.gov/36378335 https://pubmed.ncbi.nlm.nih.go…	https://pubmed.ncbi.nlm.nih.gov/36601110 https://pubmed.ncbi.nlm.nih.gov/36566680 https://pubmed.ncbi.nlm.nih.gov/36499116 https://pubmed.ncbi.nlm.nih.gov/36494838 https://pubmed.ncbi.nlm.nih.gov/36481372 https://pubmed.ncbi.nlm.nih.gov/36478139 https://pubmed.ncbi.nlm.nih.gov/36413852 https://pubmed.ncbi.nlm.nih.gov/36410275 https://pubmed.ncbi.nlm.nih.gov/36378335 https://pubmed.ncbi.nlm.nih.go…	https://pubmed.ncbi.nlm.nih.gov/36655331 https://pubmed.ncbi.nlm.nih.gov/36651266 https://pubmed.ncbi.nlm.nih.gov/36624495 https://pubmed.ncbi.nlm.nih.gov/36609266 https://pubmed.ncbi.nlm.nih.gov/36606207 https://pubmed.ncbi.nlm.nih.gov/36601110 https://pubmed.ncbi.nlm.nih.gov/36590089 https://pubmed.ncbi.nlm.nih.gov/36587290 https://pubmed.ncbi.nlm.nih.gov/36575589 https://pubmed.ncbi.nlm.nih.go…
ENSG00000074527	NTN4	107.091	-4.02998	1.27998e-12	2.65174e-10	Y	netrin 4	PRO3091	netrin-4|beta-netrin|hepar-derived netrin-like protein	netrin 4	https://www.ensembl.org/Homo_sapiens/Gene/ExpressionAtlas?g=ENSG00000074527	http://www.ensembl.org/id/ENSG00000074527	https://www.ncbi.nlm.nih.gov/gene?term=(NTN4[Gene Name]) AND Homo sapiens[Organism]	https://pubmed.ncbi.nlm.nih.gov/35732855 https://pubmed.ncbi.nlm.nih.gov/35232666 https://pubmed.ncbi.nlm.nih.gov/33923095 https://pubmed.ncbi.nlm.nih.gov/33447992 https://pubmed.ncbi.nlm.nih.gov/32871102 https://pubmed.ncbi.nlm.nih.gov/32319615 https://pubmed.ncbi.nlm.nih.gov/32034658 https://pubmed.ncbi.nlm.nih.gov/31914695 https://pubmed.ncbi.nlm.nih.gov/31878307 https://pubmed.ncbi.nlm.nih.go…	https://pubmed.ncbi.nlm.nih.gov/35732855 https://pubmed.ncbi.nlm.nih.gov/35232666 https://pubmed.ncbi.nlm.nih.gov/33923095 https://pubmed.ncbi.nlm.nih.gov/33447992 https://pubmed.ncbi.nlm.nih.gov/32871102 https://pubmed.ncbi.nlm.nih.gov/32319615 https://pubmed.ncbi.nlm.nih.gov/32034658 https://pubmed.ncbi.nlm.nih.gov/31914695 https://pubmed.ncbi.nlm.nih.gov/31878307 https://pubmed.ncbi.nlm.nih.go…	https://pubmed.ncbi.nlm.nih.gov/36266461 https://pubmed.ncbi.nlm.nih.gov/35732855 https://pubmed.ncbi.nlm.nih.gov/35687692 https://pubmed.ncbi.nlm.nih.gov/35232666 https://pubmed.ncbi.nlm.nih.gov/34929337 https://pubmed.ncbi.nlm.nih.gov/34673944 https://pubmed.ncbi.nlm.nih.gov/33923095 https://pubmed.ncbi.nlm.nih.gov/33447992 https://pubmed.ncbi.nlm.nih.gov/33338883 https://pubmed.ncbi.nlm.nih.go…
ENSG00000135046	ANXA1	2587.29	-2.13239	1.43239e-12	2.92896e-10	Y	annexin A1	ANX1, LPC1	annexin A1|annexin I (lipocortin I)|annexin-1|calpactin II|calpactin-2|chromobindin-9|epididymis secretory sperm binding protein|phospholipase A2 inhibitory protein	annexin A1	https://www.ensembl.org/Homo_sapiens/Gene/ExpressionAtlas?g=ENSG00000135046	http://www.ensembl.org/id/ENSG00000135046	https://www.ncbi.nlm.nih.gov/gene?term=(ANXA1[Gene Name]) AND Homo sapiens[Organism]	https://pubmed.ncbi.nlm.nih.gov/36632451 https://pubmed.ncbi.nlm.nih.gov/36631011 https://pubmed.ncbi.nlm.nih.gov/36560694 https://pubmed.ncbi.nlm.nih.gov/36479126 https://pubmed.ncbi.nlm.nih.gov/36466095 https://pubmed.ncbi.nlm.nih.gov/36414640 https://pubmed.ncbi.nlm.nih.gov/36403890 https://pubmed.ncbi.nlm.nih.gov/36401196 https://pubmed.ncbi.nlm.nih.gov/36316443 https://pubmed.ncbi.nlm.nih.go…	https://pubmed.ncbi.nlm.nih.gov/36632451 https://pubmed.ncbi.nlm.nih.gov/36631011 https://pubmed.ncbi.nlm.nih.gov/36560694 https://pubmed.ncbi.nlm.nih.gov/36479126 https://pubmed.ncbi.nlm.nih.gov/36466095 https://pubmed.ncbi.nlm.nih.gov/36414640 https://pubmed.ncbi.nlm.nih.gov/36403890 https://pubmed.ncbi.nlm.nih.gov/36401196 https://pubmed.ncbi.nlm.nih.gov/36316443 https://pubmed.ncbi.nlm.nih.go…	https://pubmed.ncbi.nlm.nih.gov/36678567 https://pubmed.ncbi.nlm.nih.gov/36660181 https://pubmed.ncbi.nlm.nih.gov/36647001 https://pubmed.ncbi.nlm.nih.gov/36644197 https://pubmed.ncbi.nlm.nih.gov/36632451 https://pubmed.ncbi.nlm.nih.gov/36631478 https://pubmed.ncbi.nlm.nih.gov/36631011 https://pubmed.ncbi.nlm.nih.gov/36613460 https://pubmed.ncbi.nlm.nih.gov/36581673 https://pubmed.ncbi.nlm.nih.go…
ENSG00000073910	FRY	123.394	-3.17906	2.41449e-12	4.87387e-10	Y	FRY microtubule binding protein	13CDNA73, 214K23.2, C13orf14, CG003, bA207N4.2, bA37E23.1	protein furry homolog|WUGSC:H_2G3A.1|furry homolog	FRY microtubule binding protein	https://www.ensembl.org/Homo_sapiens/Gene/ExpressionAtlas?g=ENSG00000073910	http://www.ensembl.org/id/ENSG00000073910	https://www.ncbi.nlm.nih.gov/gene?term=(FRY[Gene Name]) AND Homo sapiens[Organism]	https://pubmed.ncbi.nlm.nih.gov/36653054 https://pubmed.ncbi.nlm.nih.gov/36650154 https://pubmed.ncbi.nlm.nih.gov/36645791 https://pubmed.ncbi.nlm.nih.gov/36578917 https://pubmed.ncbi.nlm.nih.gov/36560629 https://pubmed.ncbi.nlm.nih.gov/36548733 https://pubmed.ncbi.nlm.nih.gov/36547983 https://pubmed.ncbi.nlm.nih.gov/36543543 https://pubmed.ncbi.nlm.nih.gov/36537190 https://pubmed.ncbi.nlm.nih.go…	https://pubmed.ncbi.nlm.nih.gov/36653054 https://pubmed.ncbi.nlm.nih.gov/36650154 https://pubmed.ncbi.nlm.nih.gov/36645791 https://pubmed.ncbi.nlm.nih.gov/36578917 https://pubmed.ncbi.nlm.nih.gov/36560629 https://pubmed.ncbi.nlm.nih.gov/36548733 https://pubmed.ncbi.nlm.nih.gov/36547983 https://pubmed.ncbi.nlm.nih.gov/36543543 https://pubmed.ncbi.nlm.nih.gov/36537190 https://pubmed.ncbi.nlm.nih.go…	https://pubmed.ncbi.nlm.nih.gov/36677503 https://pubmed.ncbi.nlm.nih.gov/36669391 https://pubmed.ncbi.nlm.nih.gov/36668721 https://pubmed.ncbi.nlm.nih.gov/36660300 https://pubmed.ncbi.nlm.nih.gov/36658763 https://pubmed.ncbi.nlm.nih.gov/36653054 https://pubmed.ncbi.nlm.nih.gov/36650154 https://pubmed.ncbi.nlm.nih.gov/36645791 https://pubmed.ncbi.nlm.nih.gov/36643624 https://pubmed.ncbi.nlm.nih.go…
ENSG00000268388	FENDRR	388.506	2.48013	3.5859e-12	7.14684e-10	Y	FOXF1 adjacent non-coding developmental regulatory RNA	FOXF1-AS1, FOXF1AS1, TCONS_00024240, lincFOXF1, onco-lncRNA-21	FOXF1 antisense RNA 1 (head to head)|FOXF1 antisense RNA 1 (non-protein coding)	FOXF1 adjacent non-coding developmental regulatory RNA	https://www.ensembl.org/Homo_sapiens/Gene/ExpressionAtlas?g=ENSG00000268388	http://www.ensembl.org/id/ENSG00000268388	https://www.ncbi.nlm.nih.gov/gene?term=(FENDRR[Gene Name]) AND Homo sapiens[Organism]	https://pubmed.ncbi.nlm.nih.gov/36222666 https://pubmed.ncbi.nlm.nih.gov/36016939 https://pubmed.ncbi.nlm.nih.gov/35533956 https://pubmed.ncbi.nlm.nih.gov/35428927 https://pubmed.ncbi.nlm.nih.gov/35183135 https://pubmed.ncbi.nlm.nih.gov/34697986 https://pubmed.ncbi.nlm.nih.gov/34563175 https://pubmed.ncbi.nlm.nih.gov/34558724 https://pubmed.ncbi.nlm.nih.gov/34445242 https://pubmed.ncbi.nlm.nih.go…	https://pubmed.ncbi.nlm.nih.gov/36222666 https://pubmed.ncbi.nlm.nih.gov/36016939 https://pubmed.ncbi.nlm.nih.gov/35533956 https://pubmed.ncbi.nlm.nih.gov/35428927 https://pubmed.ncbi.nlm.nih.gov/35183135 https://pubmed.ncbi.nlm.nih.gov/34697986 https://pubmed.ncbi.nlm.nih.gov/34563175 https://pubmed.ncbi.nlm.nih.gov/34558724 https://pubmed.ncbi.nlm.nih.gov/34445242 https://pubmed.ncbi.nlm.nih.go…	https://pubmed.ncbi.nlm.nih.gov/36531020 https://pubmed.ncbi.nlm.nih.gov/36284300 https://pubmed.ncbi.nlm.nih.gov/36222666 https://pubmed.ncbi.nlm.nih.gov/36101384 https://pubmed.ncbi.nlm.nih.gov/36016939 https://pubmed.ncbi.nlm.nih.gov/35747790 https://pubmed.ncbi.nlm.nih.gov/35743849 https://pubmed.ncbi.nlm.nih.gov/35579154 https://pubmed.ncbi.nlm.nih.gov/35533956 https://pubmed.ncbi.nlm.nih.go…
ENSG00000183963	SMTN	1176.1	2.16221	4.53025e-12	8.9161e-10	Y	smoothelin		smoothelin	smoothelin	https://www.ensembl.org/Homo_sapiens/Gene/ExpressionAtlas?g=ENSG00000183963	http://www.ensembl.org/id/ENSG00000183963	https://www.ncbi.nlm.nih.gov/gene?term=(SMTN[Gene Name]) AND Homo sapiens[Organism]	https://pubmed.ncbi.nlm.nih.gov/35932882 https://pubmed.ncbi.nlm.nih.gov/34914287 https://pubmed.ncbi.nlm.nih.gov/34153790 https://pubmed.ncbi.nlm.nih.gov/34001947 https://pubmed.ncbi.nlm.nih.gov/33858751 https://pubmed.ncbi.nlm.nih.gov/33090031 https://pubmed.ncbi.nlm.nih.gov/32749542 https://pubmed.ncbi.nlm.nih.gov/32255003 https://pubmed.ncbi.nlm.nih.gov/31821896 https://pubmed.ncbi.nlm.nih.go…	https://pubmed.ncbi.nlm.nih.gov/35932882 https://pubmed.ncbi.nlm.nih.gov/34914287 https://pubmed.ncbi.nlm.nih.gov/34153790 https://pubmed.ncbi.nlm.nih.gov/34001947 https://pubmed.ncbi.nlm.nih.gov/33858751 https://pubmed.ncbi.nlm.nih.gov/33090031 https://pubmed.ncbi.nlm.nih.gov/32749542 https://pubmed.ncbi.nlm.nih.gov/32255003 https://pubmed.ncbi.nlm.nih.gov/31821896 https://pubmed.ncbi.nlm.nih.go…	https://pubmed.ncbi.nlm.nih.gov/36657531 https://pubmed.ncbi.nlm.nih.gov/35932882 https://pubmed.ncbi.nlm.nih.gov/35928032 https://pubmed.ncbi.nlm.nih.gov/34914287 https://pubmed.ncbi.nlm.nih.gov/34153790 https://pubmed.ncbi.nlm.nih.gov/34001947 https://pubmed.ncbi.nlm.nih.gov/33858751 https://pubmed.ncbi.nlm.nih.gov/33691831 https://pubmed.ncbi.nlm.nih.gov/33090031 https://pubmed.ncbi.nlm.nih.go…
ENSG00000172216	CEBPB	987.898	2.26648	5.00793e-12	9.73455e-10	Y	CCAAT enhancer binding protein beta	C/EBP-beta, IL6DBP, NF-IL6, TCF5	CCAAT/enhancer-binding protein beta|CCAAT/enhancer binding protein (C/EBP), beta|interleukin 6-dependent DNA-binding protein|nuclear factor NF-IL6|nuclear factor of interleukin 6|transcription factor 5|transcription factor C/EBP beta	CCAAT enhancer binding protein beta	https://www.ensembl.org/Homo_sapiens/Gene/ExpressionAtlas?g=ENSG00000172216	http://www.ensembl.org/id/ENSG00000172216	https://www.ncbi.nlm.nih.gov/gene?term=(CEBPB[Gene Name]) AND Homo sapiens[Organism]	https://pubmed.ncbi.nlm.nih.gov/36556936 https://pubmed.ncbi.nlm.nih.gov/36361676 https://pubmed.ncbi.nlm.nih.gov/36353635 https://pubmed.ncbi.nlm.nih.gov/36326669 https://pubmed.ncbi.nlm.nih.gov/36318489 https://pubmed.ncbi.nlm.nih.gov/36304450 https://pubmed.ncbi.nlm.nih.gov/36281744 https://pubmed.ncbi.nlm.nih.gov/36254052 https://pubmed.ncbi.nlm.nih.gov/36206743 https://pubmed.ncbi.nlm.nih.go…	https://pubmed.ncbi.nlm.nih.gov/36556936 https://pubmed.ncbi.nlm.nih.gov/36361676 https://pubmed.ncbi.nlm.nih.gov/36353635 https://pubmed.ncbi.nlm.nih.gov/36326669 https://pubmed.ncbi.nlm.nih.gov/36318489 https://pubmed.ncbi.nlm.nih.gov/36304450 https://pubmed.ncbi.nlm.nih.gov/36281744 https://pubmed.ncbi.nlm.nih.gov/36254052 https://pubmed.ncbi.nlm.nih.gov/36206743 https://pubmed.ncbi.nlm.nih.go…	https://pubmed.ncbi.nlm.nih.gov/36675048 https://pubmed.ncbi.nlm.nih.gov/36674845 https://pubmed.ncbi.nlm.nih.gov/36641890 https://pubmed.ncbi.nlm.nih.gov/36633260 https://pubmed.ncbi.nlm.nih.gov/36583687 https://pubmed.ncbi.nlm.nih.gov/36582740 https://pubmed.ncbi.nlm.nih.gov/36556936 https://pubmed.ncbi.nlm.nih.gov/36547387 https://pubmed.ncbi.nlm.nih.gov/36544491 https://pubmed.ncbi.nlm.nih.go…
ENSG00000162520	SYNC	151.505	2.83579	5.66825e-12	1.08837e-09	Y	syncoilin, intermediate filament protein	SYNC1, SYNCOILIN	syncoilin|intermediate filament protein syncoilin|syncoilin intermediate filament 1|syncoilin-1	syncoilin, intermediate filament protein	https://www.ensembl.org/Homo_sapiens/Gene/ExpressionAtlas?g=ENSG00000162520	http://www.ensembl.org/id/ENSG00000162520	https://www.ncbi.nlm.nih.gov/gene?term=(SYNC[Gene Name]) AND Homo sapiens[Organism]	https://pubmed.ncbi.nlm.nih.gov/36577503 https://pubmed.ncbi.nlm.nih.gov/36469406 https://pubmed.ncbi.nlm.nih.gov/36394452 https://pubmed.ncbi.nlm.nih.gov/36343999 https://pubmed.ncbi.nlm.nih.gov/36314305 https://pubmed.ncbi.nlm.nih.gov/36196697 https://pubmed.ncbi.nlm.nih.gov/36096800 https://pubmed.ncbi.nlm.nih.gov/36095930 https://pubmed.ncbi.nlm.nih.gov/36086581 https://pubmed.ncbi.nlm.nih.go…	https://pubmed.ncbi.nlm.nih.gov/36577503 https://pubmed.ncbi.nlm.nih.gov/36469406 https://pubmed.ncbi.nlm.nih.gov/36394452 https://pubmed.ncbi.nlm.nih.gov/36343999 https://pubmed.ncbi.nlm.nih.gov/36314305 https://pubmed.ncbi.nlm.nih.gov/36196697 https://pubmed.ncbi.nlm.nih.gov/36096800 https://pubmed.ncbi.nlm.nih.gov/36095930 https://pubmed.ncbi.nlm.nih.gov/36086581 https://pubmed.ncbi.nlm.nih.go…	https://pubmed.ncbi.nlm.nih.gov/36656282 https://pubmed.ncbi.nlm.nih.gov/36649159 https://pubmed.ncbi.nlm.nih.gov/36646769 https://pubmed.ncbi.nlm.nih.gov/36577503 https://pubmed.ncbi.nlm.nih.gov/36556006 https://pubmed.ncbi.nlm.nih.gov/36493398 https://pubmed.ncbi.nlm.nih.gov/36469406 https://pubmed.ncbi.nlm.nih.gov/36463009 https://pubmed.ncbi.nlm.nih.gov/36462001 https://pubmed.ncbi.nlm.nih.go…
ENSG00000121904	CSMD2	112.159	-3.94446	6.85829e-12	1.28552e-09	Y	CUB and Sushi multiple domains 2	dJ1007G16.1, dJ1007G16.2, dJ947L8.1	CUB and sushi domain-containing protein 2|CUB and Sushi (SCR repeat) domain|CUB and sushi multiple domains protein 2	CUB and Sushi multiple domains 2	https://www.ensembl.org/Homo_sapiens/Gene/ExpressionAtlas?g=ENSG00000121904	http://www.ensembl.org/id/ENSG00000121904	https://www.ncbi.nlm.nih.gov/gene?term=(CSMD2[Gene Name]) AND Homo sapiens[Organism]	https://pubmed.ncbi.nlm.nih.gov/35721735 https://pubmed.ncbi.nlm.nih.gov/35710421 https://pubmed.ncbi.nlm.nih.gov/34168209 https://pubmed.ncbi.nlm.nih.gov/33557409 https://pubmed.ncbi.nlm.nih.gov/32190687 https://pubmed.ncbi.nlm.nih.gov/32065787 https://pubmed.ncbi.nlm.nih.gov/31200735 https://pubmed.ncbi.nlm.nih.gov/28332277 https://pubmed.ncbi.nlm.nih.gov/27890662 https://pubmed.ncbi.nlm.nih.go…	https://pubmed.ncbi.nlm.nih.gov/35721735 https://pubmed.ncbi.nlm.nih.gov/35710421 https://pubmed.ncbi.nlm.nih.gov/34168209 https://pubmed.ncbi.nlm.nih.gov/33557409 https://pubmed.ncbi.nlm.nih.gov/32190687 https://pubmed.ncbi.nlm.nih.gov/32065787 https://pubmed.ncbi.nlm.nih.gov/31200735 https://pubmed.ncbi.nlm.nih.gov/28332277 https://pubmed.ncbi.nlm.nih.gov/27890662 https://pubmed.ncbi.nlm.nih.go…	https://pubmed.ncbi.nlm.nih.gov/36061177 https://pubmed.ncbi.nlm.nih.gov/35721735 https://pubmed.ncbi.nlm.nih.gov/35710421 https://pubmed.ncbi.nlm.nih.gov/34168209 https://pubmed.ncbi.nlm.nih.gov/33680913 https://pubmed.ncbi.nlm.nih.gov/33557409 https://pubmed.ncbi.nlm.nih.gov/32801780 https://pubmed.ncbi.nlm.nih.gov/32509169 https://pubmed.ncbi.nlm.nih.gov/32190687 https://pubmed.ncbi.nlm.nih.go…
ENSG00000136153	LMO7	704.21	-2.21164	7.05062e-12	1.30602e-09	Y	LIM domain 7	FBX20, FBXO20, LMO7b, LOMP	LIM domain only protein 7|F-box only protein 20|F-box protein Fbx20|LIM domain only 7 protein|LMO-7|zinc-finger domain-containing protein	LIM domain 7	https://www.ensembl.org/Homo_sapiens/Gene/ExpressionAtlas?g=ENSG00000136153	http://www.ensembl.org/id/ENSG00000136153	https://www.ncbi.nlm.nih.gov/gene?term=(LMO7[Gene Name]) AND Homo sapiens[Organism]	https://pubmed.ncbi.nlm.nih.gov/36442233 https://pubmed.ncbi.nlm.nih.gov/35046938 https://pubmed.ncbi.nlm.nih.gov/34895422 https://pubmed.ncbi.nlm.nih.gov/34884689 https://pubmed.ncbi.nlm.nih.gov/34847940 https://pubmed.ncbi.nlm.nih.gov/34839606 https://pubmed.ncbi.nlm.nih.gov/34541785 https://pubmed.ncbi.nlm.nih.gov/34348092 https://pubmed.ncbi.nlm.nih.gov/33991849 https://pubmed.ncbi.nlm.nih.go…	https://pubmed.ncbi.nlm.nih.gov/36442233 https://pubmed.ncbi.nlm.nih.gov/35046938 https://pubmed.ncbi.nlm.nih.gov/34895422 https://pubmed.ncbi.nlm.nih.gov/34884689 https://pubmed.ncbi.nlm.nih.gov/34847940 https://pubmed.ncbi.nlm.nih.gov/34839606 https://pubmed.ncbi.nlm.nih.gov/34541785 https://pubmed.ncbi.nlm.nih.gov/34348092 https://pubmed.ncbi.nlm.nih.gov/33991849 https://pubmed.ncbi.nlm.nih.go…	https://pubmed.ncbi.nlm.nih.gov/36497072 https://pubmed.ncbi.nlm.nih.gov/36442233 https://pubmed.ncbi.nlm.nih.gov/36103830 https://pubmed.ncbi.nlm.nih.gov/36009561 https://pubmed.ncbi.nlm.nih.gov/35875336 https://pubmed.ncbi.nlm.nih.gov/35872903 https://pubmed.ncbi.nlm.nih.gov/35664754 https://pubmed.ncbi.nlm.nih.gov/35451459 https://pubmed.ncbi.nlm.nih.gov/35046938 https://pubmed.ncbi.nlm.nih.go…
ENSG00000165507	DEPP1	83.3109	-4.43593	7.4239e-12	1.35918e-09	Y	DEPP autophagy regulator 1	C10orf10, DEPP, FIG, Fseg	protein DEPP1|DEPP1 autophagy regulator|decidual protein induced by progesterone|fasting induced|fasting-induced gene protein|fasting-induced protein|fat-specific expressed|protein DEPP	DEPP autophagy regulator 1	https://www.ensembl.org/Homo_sapiens/Gene/ExpressionAtlas?g=ENSG00000165507	http://www.ensembl.org/id/ENSG00000165507	https://www.ncbi.nlm.nih.gov/gene?term=(DEPP1[Gene Name]) AND Homo sapiens[Organism]	https://pubmed.ncbi.nlm.nih.gov/35061305 https://pubmed.ncbi.nlm.nih.gov/34997944 https://pubmed.ncbi.nlm.nih.gov/34872491 https://pubmed.ncbi.nlm.nih.gov/31963726 https://pubmed.ncbi.nlm.nih.gov/30278442 https://pubmed.ncbi.nlm.nih.gov/29749481 https://pubmed.ncbi.nlm.nih.gov/29440765 https://pubmed.ncbi.nlm.nih.gov/28545464 https://pubmed.ncbi.nlm.nih.gov/27121845 https://pubmed.ncbi.nlm.nih.go…	https://pubmed.ncbi.nlm.nih.gov/35061305 https://pubmed.ncbi.nlm.nih.gov/34997944 https://pubmed.ncbi.nlm.nih.gov/34872491 https://pubmed.ncbi.nlm.nih.gov/31963726 https://pubmed.ncbi.nlm.nih.gov/30278442 https://pubmed.ncbi.nlm.nih.gov/29749481 https://pubmed.ncbi.nlm.nih.gov/29440765 https://pubmed.ncbi.nlm.nih.gov/28545464 https://pubmed.ncbi.nlm.nih.gov/27121845 https://pubmed.ncbi.nlm.nih.go…	https://pubmed.ncbi.nlm.nih.gov/35061305 https://pubmed.ncbi.nlm.nih.gov/34997944 https://pubmed.ncbi.nlm.nih.gov/34872491 https://pubmed.ncbi.nlm.nih.gov/34045958 https://pubmed.ncbi.nlm.nih.gov/31963726 https://pubmed.ncbi.nlm.nih.gov/30278442 https://pubmed.ncbi.nlm.nih.gov/29749481 https://pubmed.ncbi.nlm.nih.gov/29702025 https://pubmed.ncbi.nlm.nih.gov/29440765 https://pubmed.ncbi.nlm.nih.go…
ENSG00000164379	FOXQ1	59.5466	4.13377	8.03143e-12	1.4535e-09	Y	forkhead box Q1	HFH1	forkhead box protein Q1|HFH-1|HNF-3/forkhead-like protein 1|hepatocyte nuclear factor 3 forkhead homolog 1|winged helix/forkhead transcription factor	forkhead box Q1	https://www.ensembl.org/Homo_sapiens/Gene/ExpressionAtlas?g=ENSG00000164379	http://www.ensembl.org/id/ENSG00000164379	https://www.ncbi.nlm.nih.gov/gene?term=(FOXQ1[Gene Name]) AND Homo sapiens[Organism]	https://pubmed.ncbi.nlm.nih.gov/36576616 https://pubmed.ncbi.nlm.nih.gov/36319643 https://pubmed.ncbi.nlm.nih.gov/36284357 https://pubmed.ncbi.nlm.nih.gov/36253446 https://pubmed.ncbi.nlm.nih.gov/36124643 https://pubmed.ncbi.nlm.nih.gov/36078038 https://pubmed.ncbi.nlm.nih.gov/36050744 https://pubmed.ncbi.nlm.nih.gov/35994645 https://pubmed.ncbi.nlm.nih.gov/35633908 https://pubmed.ncbi.nlm.nih.go…	https://pubmed.ncbi.nlm.nih.gov/36576616 https://pubmed.ncbi.nlm.nih.gov/36319643 https://pubmed.ncbi.nlm.nih.gov/36284357 https://pubmed.ncbi.nlm.nih.gov/36253446 https://pubmed.ncbi.nlm.nih.gov/36124643 https://pubmed.ncbi.nlm.nih.gov/36078038 https://pubmed.ncbi.nlm.nih.gov/36050744 https://pubmed.ncbi.nlm.nih.gov/35994645 https://pubmed.ncbi.nlm.nih.gov/35633908 https://pubmed.ncbi.nlm.nih.go…	https://pubmed.ncbi.nlm.nih.gov/36576616 https://pubmed.ncbi.nlm.nih.gov/36575252 https://pubmed.ncbi.nlm.nih.gov/36457036 https://pubmed.ncbi.nlm.nih.gov/36319643 https://pubmed.ncbi.nlm.nih.gov/36284357 https://pubmed.ncbi.nlm.nih.gov/36253446 https://pubmed.ncbi.nlm.nih.gov/36183845 https://pubmed.ncbi.nlm.nih.gov/36124643 https://pubmed.ncbi.nlm.nih.gov/36118871 https://pubmed.ncbi.nlm.nih.go…
ENSG00000106003	LFNG	244.968	-2.51021	8.2715e-12	1.47994e-09	Y	LFNG O-fucosylpeptide 3-beta-N-acetylglucosaminyltransferase	SCDO3	beta-1,3-N-acetylglucosaminyltransferase lunatic fringe	LFNG O-fucosylpeptide 3-beta-N-acetylglucosaminyltransferase	https://www.ensembl.org/Homo_sapiens/Gene/ExpressionAtlas?g=ENSG00000106003	http://www.ensembl.org/id/ENSG00000106003	https://www.ncbi.nlm.nih.gov/gene?term=(LFNG[Gene Name]) AND Homo sapiens[Organism]	https://pubmed.ncbi.nlm.nih.gov/35954202 https://pubmed.ncbi.nlm.nih.gov/35885892 https://pubmed.ncbi.nlm.nih.gov/35660646 https://pubmed.ncbi.nlm.nih.gov/34742334 https://pubmed.ncbi.nlm.nih.gov/34641486 https://pubmed.ncbi.nlm.nih.gov/34371013 https://pubmed.ncbi.nlm.nih.gov/33894418 https://pubmed.ncbi.nlm.nih.gov/33562410 https://pubmed.ncbi.nlm.nih.gov/33341260 https://pubmed.ncbi.nlm.nih.go…	https://pubmed.ncbi.nlm.nih.gov/35954202 https://pubmed.ncbi.nlm.nih.gov/35885892 https://pubmed.ncbi.nlm.nih.gov/35660646 https://pubmed.ncbi.nlm.nih.gov/34742334 https://pubmed.ncbi.nlm.nih.gov/34641486 https://pubmed.ncbi.nlm.nih.gov/34371013 https://pubmed.ncbi.nlm.nih.gov/33894418 https://pubmed.ncbi.nlm.nih.gov/33562410 https://pubmed.ncbi.nlm.nih.gov/33341260 https://pubmed.ncbi.nlm.nih.go…	https://pubmed.ncbi.nlm.nih.gov/36453506 https://pubmed.ncbi.nlm.nih.gov/36406268 https://pubmed.ncbi.nlm.nih.gov/36236149 https://pubmed.ncbi.nlm.nih.gov/35954202 https://pubmed.ncbi.nlm.nih.gov/35885892 https://pubmed.ncbi.nlm.nih.gov/35686648 https://pubmed.ncbi.nlm.nih.gov/35660646 https://pubmed.ncbi.nlm.nih.gov/35623385 https://pubmed.ncbi.nlm.nih.gov/35451126 https://pubmed.ncbi.nlm.nih.go…
ENSG00000253161	LINC01605	171.867	2.66956	9.58208e-12	1.69517e-09	Y	long intergenic non-protein coding RNA 1605	LincDUSP, ODIR1	RP11-527N22.2|TCONS_00014973|osteogenic differentiation inhibitory regulator 1	long intergenic non-protein coding RNA 1605	https://www.ensembl.org/Homo_sapiens/Gene/ExpressionAtlas?g=ENSG00000253161	http://www.ensembl.org/id/ENSG00000253161	https://www.ncbi.nlm.nih.gov/gene?term=(LINC01605[Gene Name]) AND Homo sapiens[Organism]	https://pubmed.ncbi.nlm.nih.gov/35411612 https://pubmed.ncbi.nlm.nih.gov/34011185 https://pubmed.ncbi.nlm.nih.gov/33629302 https://pubmed.ncbi.nlm.nih.gov/32468063 https://pubmed.ncbi.nlm.nih.gov/31841192 https://pubmed.ncbi.nlm.nih.gov/30054424	https://pubmed.ncbi.nlm.nih.gov/35411612 https://pubmed.ncbi.nlm.nih.gov/34011185 https://pubmed.ncbi.nlm.nih.gov/33629302 https://pubmed.ncbi.nlm.nih.gov/32468063 https://pubmed.ncbi.nlm.nih.gov/31841192 https://pubmed.ncbi.nlm.nih.gov/30054424	https://pubmed.ncbi.nlm.nih.gov/36637626 https://pubmed.ncbi.nlm.nih.gov/35411612 https://pubmed.ncbi.nlm.nih.gov/35401799 https://pubmed.ncbi.nlm.nih.gov/35373703 https://pubmed.ncbi.nlm.nih.gov/34944836 https://pubmed.ncbi.nlm.nih.gov/34544413 https://pubmed.ncbi.nlm.nih.gov/34011185 https://pubmed.ncbi.nlm.nih.gov/33821985 https://pubmed.ncbi.nlm.nih.gov/33629302 https://pubmed.ncbi.nlm.nih.go…
ENSG00000166741	NNMT	630.737	-2.48303	1.16848e-11	2.0442e-09	Y	nicotinamide N-methyltransferase		nicotinamide N-methyltransferase	nicotinamide N-methyltransferase	https://www.ensembl.org/Homo_sapiens/Gene/ExpressionAtlas?g=ENSG00000166741	http://www.ensembl.org/id/ENSG00000166741	https://www.ncbi.nlm.nih.gov/gene?term=(NNMT[Gene Name]) AND Homo sapiens[Organism]	https://pubmed.ncbi.nlm.nih.gov/36613653 https://pubmed.ncbi.nlm.nih.gov/36525817 https://pubmed.ncbi.nlm.nih.gov/36291696 https://pubmed.ncbi.nlm.nih.gov/36156375 https://pubmed.ncbi.nlm.nih.gov/36153399 https://pubmed.ncbi.nlm.nih.gov/36139012 https://pubmed.ncbi.nlm.nih.gov/36104373 https://pubmed.ncbi.nlm.nih.gov/36087230 https://pubmed.ncbi.nlm.nih.gov/36000237 https://pubmed.ncbi.nlm.nih.go…	https://pubmed.ncbi.nlm.nih.gov/36613653 https://pubmed.ncbi.nlm.nih.gov/36525817 https://pubmed.ncbi.nlm.nih.gov/36291696 https://pubmed.ncbi.nlm.nih.gov/36156375 https://pubmed.ncbi.nlm.nih.gov/36153399 https://pubmed.ncbi.nlm.nih.gov/36139012 https://pubmed.ncbi.nlm.nih.gov/36104373 https://pubmed.ncbi.nlm.nih.gov/36087230 https://pubmed.ncbi.nlm.nih.gov/36000237 https://pubmed.ncbi.nlm.nih.go…	https://pubmed.ncbi.nlm.nih.gov/36676950 https://pubmed.ncbi.nlm.nih.gov/36636067 https://pubmed.ncbi.nlm.nih.gov/36633260 https://pubmed.ncbi.nlm.nih.gov/36622754 https://pubmed.ncbi.nlm.nih.gov/36613653 https://pubmed.ncbi.nlm.nih.gov/36572038 https://pubmed.ncbi.nlm.nih.gov/36562466 https://pubmed.ncbi.nlm.nih.gov/36525817 https://pubmed.ncbi.nlm.nih.gov/36386816 https://pubmed.ncbi.nlm.nih.go…
ENSG00000118407	FILIP1	80.5682	-6.50535	2.06539e-11	3.53473e-09	Y	filamin A interacting protein 1	FILIP	filamin-A-interacting protein 1	filamin A interacting protein 1	https://www.ensembl.org/Homo_sapiens/Gene/ExpressionAtlas?g=ENSG00000118407	http://www.ensembl.org/id/ENSG00000118407	https://www.ncbi.nlm.nih.gov/gene?term=(FILIP1[Gene Name]) AND Homo sapiens[Organism]	https://pubmed.ncbi.nlm.nih.gov/36344539 https://pubmed.ncbi.nlm.nih.gov/34000624 https://pubmed.ncbi.nlm.nih.gov/32444788 https://pubmed.ncbi.nlm.nih.gov/32441533 https://pubmed.ncbi.nlm.nih.gov/31465999 https://pubmed.ncbi.nlm.nih.gov/24327474 https://pubmed.ncbi.nlm.nih.gov/23414321 https://pubmed.ncbi.nlm.nih.gov/23174249 https://pubmed.ncbi.nlm.nih.gov/23087206 https://pubmed.ncbi.nlm.nih.go…	https://pubmed.ncbi.nlm.nih.gov/36344539 https://pubmed.ncbi.nlm.nih.gov/34000624 https://pubmed.ncbi.nlm.nih.gov/32444788 https://pubmed.ncbi.nlm.nih.gov/32441533 https://pubmed.ncbi.nlm.nih.gov/31465999 https://pubmed.ncbi.nlm.nih.gov/24327474 https://pubmed.ncbi.nlm.nih.gov/23414321 https://pubmed.ncbi.nlm.nih.gov/23174249 https://pubmed.ncbi.nlm.nih.gov/23087206 https://pubmed.ncbi.nlm.nih.go…	https://pubmed.ncbi.nlm.nih.gov/36344539 https://pubmed.ncbi.nlm.nih.gov/34578226 https://pubmed.ncbi.nlm.nih.gov/34093663 https://pubmed.ncbi.nlm.nih.gov/34000624 https://pubmed.ncbi.nlm.nih.gov/32444788 https://pubmed.ncbi.nlm.nih.gov/32441533 https://pubmed.ncbi.nlm.nih.gov/32411535 https://pubmed.ncbi.nlm.nih.gov/31465999 https://pubmed.ncbi.nlm.nih.gov/29618024 https://pubmed.ncbi.nlm.nih.go…
ENSG00000175445	LPL	64.8241	-4.5628	2.26376e-11	3.83257e-09	Y	lipoprotein lipase	HDLCQ11, LIPD	lipoprotein lipase|phospholipase A1	lipoprotein lipase	https://www.ensembl.org/Homo_sapiens/Gene/ExpressionAtlas?g=ENSG00000175445	http://www.ensembl.org/id/ENSG00000175445	https://www.ncbi.nlm.nih.gov/gene?term=(LPL[Gene Name]) AND Homo sapiens[Organism]	https://pubmed.ncbi.nlm.nih.gov/36649378 https://pubmed.ncbi.nlm.nih.gov/36627447 https://pubmed.ncbi.nlm.nih.gov/36613909 https://pubmed.ncbi.nlm.nih.gov/36596114 https://pubmed.ncbi.nlm.nih.gov/36575005 https://pubmed.ncbi.nlm.nih.gov/36561774 https://pubmed.ncbi.nlm.nih.gov/36535927 https://pubmed.ncbi.nlm.nih.gov/36522805 https://pubmed.ncbi.nlm.nih.gov/36521735 https://pubmed.ncbi.nlm.nih.go…	https://pubmed.ncbi.nlm.nih.gov/36649378 https://pubmed.ncbi.nlm.nih.gov/36627447 https://pubmed.ncbi.nlm.nih.gov/36613909 https://pubmed.ncbi.nlm.nih.gov/36596114 https://pubmed.ncbi.nlm.nih.gov/36575005 https://pubmed.ncbi.nlm.nih.gov/36561774 https://pubmed.ncbi.nlm.nih.gov/36535927 https://pubmed.ncbi.nlm.nih.gov/36522805 https://pubmed.ncbi.nlm.nih.gov/36521735 https://pubmed.ncbi.nlm.nih.go…	https://pubmed.ncbi.nlm.nih.gov/36677013 https://pubmed.ncbi.nlm.nih.gov/36670821 https://pubmed.ncbi.nlm.nih.gov/36652113 https://pubmed.ncbi.nlm.nih.gov/36651452 https://pubmed.ncbi.nlm.nih.gov/36649378 https://pubmed.ncbi.nlm.nih.gov/36648309 https://pubmed.ncbi.nlm.nih.gov/36638713 https://pubmed.ncbi.nlm.nih.gov/36631502 https://pubmed.ncbi.nlm.nih.gov/36627447 https://pubmed.ncbi.nlm.nih.go…
ENSG00000165757	JCAD	393.638	2.6793	2.50542e-11	4.19657e-09	Y	junctional cadherin 5 associated	KIAA1462	junctional cadherin 5-associated protein|junctional protein associated with coronary artery disease	junctional cadherin 5 associated	https://www.ensembl.org/Homo_sapiens/Gene/ExpressionAtlas?g=ENSG00000165757	http://www.ensembl.org/id/ENSG00000165757	https://www.ncbi.nlm.nih.gov/gene?term=(JCAD[Gene Name]) AND Homo sapiens[Organism]	https://pubmed.ncbi.nlm.nih.gov/32685059 https://pubmed.ncbi.nlm.nih.gov/32329793 https://pubmed.ncbi.nlm.nih.gov/31902252 https://pubmed.ncbi.nlm.nih.gov/31584065 https://pubmed.ncbi.nlm.nih.gov/31539914 https://pubmed.ncbi.nlm.nih.gov/31539913 https://pubmed.ncbi.nlm.nih.gov/31456518 https://pubmed.ncbi.nlm.nih.gov/30908272 https://pubmed.ncbi.nlm.nih.gov/30678728 https://pubmed.ncbi.nlm.nih.go…	https://pubmed.ncbi.nlm.nih.gov/32685059 https://pubmed.ncbi.nlm.nih.gov/32329793 https://pubmed.ncbi.nlm.nih.gov/31902252 https://pubmed.ncbi.nlm.nih.gov/31584065 https://pubmed.ncbi.nlm.nih.gov/31539914 https://pubmed.ncbi.nlm.nih.gov/31539913 https://pubmed.ncbi.nlm.nih.gov/31456518 https://pubmed.ncbi.nlm.nih.gov/30908272 https://pubmed.ncbi.nlm.nih.gov/30678728 https://pubmed.ncbi.nlm.nih.go…	https://pubmed.ncbi.nlm.nih.gov/36514298 https://pubmed.ncbi.nlm.nih.gov/36469488 https://pubmed.ncbi.nlm.nih.gov/36204584 https://pubmed.ncbi.nlm.nih.gov/33083606 https://pubmed.ncbi.nlm.nih.gov/32685059 https://pubmed.ncbi.nlm.nih.gov/32329793 https://pubmed.ncbi.nlm.nih.gov/31902252 https://pubmed.ncbi.nlm.nih.gov/31584065 https://pubmed.ncbi.nlm.nih.gov/31539914 https://pubmed.ncbi.nlm.nih.go…
ENSG00000142910	TINAGL1	315.049	-2.25958	3.26303e-11	5.40805e-09	Y	tubulointerstitial nephritis antigen like 1	ARG1, LCN7, LIECG3, TINAGRP	tubulointerstitial nephritis antigen-like|OLRG-2|P3ECSL|TIN Ag-related protein|TIN-Ag-RP|TINAG-like 1|androgen-regulated gene 1|glucocorticoid-inducible protein 5|lipocalin 7|oxidized-LDL responsive gene 2|tubulointerstitial nephritis antigen-related protein	tubulointerstitial nephritis antigen like 1	https://www.ensembl.org/Homo_sapiens/Gene/ExpressionAtlas?g=ENSG00000142910	http://www.ensembl.org/id/ENSG00000142910	https://www.ncbi.nlm.nih.gov/gene?term=(TINAGL1[Gene Name]) AND Homo sapiens[Organism]	https://pubmed.ncbi.nlm.nih.gov/35897733 https://pubmed.ncbi.nlm.nih.gov/35199864 https://pubmed.ncbi.nlm.nih.gov/33877834 https://pubmed.ncbi.nlm.nih.gov/32537806 https://pubmed.ncbi.nlm.nih.gov/31389101 https://pubmed.ncbi.nlm.nih.gov/30612941 https://pubmed.ncbi.nlm.nih.gov/26522507 https://pubmed.ncbi.nlm.nih.gov/26490183 https://pubmed.ncbi.nlm.nih.gov/25521548 https://pubmed.ncbi.nlm.nih.go…	https://pubmed.ncbi.nlm.nih.gov/35897733 https://pubmed.ncbi.nlm.nih.gov/35199864 https://pubmed.ncbi.nlm.nih.gov/33877834 https://pubmed.ncbi.nlm.nih.gov/32537806 https://pubmed.ncbi.nlm.nih.gov/31389101 https://pubmed.ncbi.nlm.nih.gov/30612941 https://pubmed.ncbi.nlm.nih.gov/26522507 https://pubmed.ncbi.nlm.nih.gov/26490183 https://pubmed.ncbi.nlm.nih.gov/25521548 https://pubmed.ncbi.nlm.nih.go…	https://pubmed.ncbi.nlm.nih.gov/36229542 https://pubmed.ncbi.nlm.nih.gov/35897733 https://pubmed.ncbi.nlm.nih.gov/35799127 https://pubmed.ncbi.nlm.nih.gov/35597451 https://pubmed.ncbi.nlm.nih.gov/35199864 https://pubmed.ncbi.nlm.nih.gov/34881800 https://pubmed.ncbi.nlm.nih.gov/33877834 https://pubmed.ncbi.nlm.nih.gov/32973494 https://pubmed.ncbi.nlm.nih.gov/32537806 https://pubmed.ncbi.nlm.nih.go…
ENSG00000183691	NOG	95.5109	-6.73051	3.52505e-11	5.75298e-09	Y	noggin	SYM1, SYNS1, SYNS1A	noggin|symphalangism 1 (proximal)	noggin	https://www.ensembl.org/Homo_sapiens/Gene/ExpressionAtlas?g=ENSG00000183691	http://www.ensembl.org/id/ENSG00000183691	https://www.ncbi.nlm.nih.gov/gene?term=(NOG[Gene Name]) AND Homo sapiens[Organism]	https://pubmed.ncbi.nlm.nih.gov/36649237 https://pubmed.ncbi.nlm.nih.gov/36649073 https://pubmed.ncbi.nlm.nih.gov/36623885 https://pubmed.ncbi.nlm.nih.gov/36543125 https://pubmed.ncbi.nlm.nih.gov/36463696 https://pubmed.ncbi.nlm.nih.gov/36443839 https://pubmed.ncbi.nlm.nih.gov/36438918 https://pubmed.ncbi.nlm.nih.gov/36414232 https://pubmed.ncbi.nlm.nih.gov/36332570 https://pubmed.ncbi.nlm.nih.go…	https://pubmed.ncbi.nlm.nih.gov/36649237 https://pubmed.ncbi.nlm.nih.gov/36649073 https://pubmed.ncbi.nlm.nih.gov/36623885 https://pubmed.ncbi.nlm.nih.gov/36543125 https://pubmed.ncbi.nlm.nih.gov/36463696 https://pubmed.ncbi.nlm.nih.gov/36443839 https://pubmed.ncbi.nlm.nih.gov/36438918 https://pubmed.ncbi.nlm.nih.gov/36414232 https://pubmed.ncbi.nlm.nih.gov/36332570 https://pubmed.ncbi.nlm.nih.go…	https://pubmed.ncbi.nlm.nih.gov/36658566 https://pubmed.ncbi.nlm.nih.gov/36652374 https://pubmed.ncbi.nlm.nih.gov/36649237 https://pubmed.ncbi.nlm.nih.gov/36649073 https://pubmed.ncbi.nlm.nih.gov/36623885 https://pubmed.ncbi.nlm.nih.gov/36587633 https://pubmed.ncbi.nlm.nih.gov/36563152 https://pubmed.ncbi.nlm.nih.gov/36551572 https://pubmed.ncbi.nlm.nih.gov/36543125 https://pubmed.ncbi.nlm.nih.go…
ENSG00000048740	CELF2	62.0136	-5.31502	3.54423e-11	5.75298e-09	Y	CUGBP Elav-like family member 2	BRUNOL3, CELF-2, CUG-BP2, CUGBP2, DEE97, ETR-3, ETR3, NAPOR	CUGBP Elav-like family member 2|CUG triplet repeat RNA-binding protein 2|CUG-BP- and ETR-3-like factor 2|ELAV-type RNA-binding protein 3|KDM2B/CELF2 fusion|RNA-binding protein BRUNOL-3|bruno-like protein 3|neuroblastoma apoptosis-related RNA-binding protein	CUGBP Elav-like family member 2	https://www.ensembl.org/Homo_sapiens/Gene/ExpressionAtlas?g=ENSG00000048740	http://www.ensembl.org/id/ENSG00000048740	https://www.ncbi.nlm.nih.gov/gene?term=(CELF2[Gene Name]) AND Homo sapiens[Organism]	https://pubmed.ncbi.nlm.nih.gov/36374812 https://pubmed.ncbi.nlm.nih.gov/36336217 https://pubmed.ncbi.nlm.nih.gov/36190000 https://pubmed.ncbi.nlm.nih.gov/35972577 https://pubmed.ncbi.nlm.nih.gov/35941836 https://pubmed.ncbi.nlm.nih.gov/35767654 https://pubmed.ncbi.nlm.nih.gov/35752978 https://pubmed.ncbi.nlm.nih.gov/35370009 https://pubmed.ncbi.nlm.nih.gov/35327643 https://pubmed.ncbi.nlm.nih.go…	https://pubmed.ncbi.nlm.nih.gov/36374812 https://pubmed.ncbi.nlm.nih.gov/36336217 https://pubmed.ncbi.nlm.nih.gov/36190000 https://pubmed.ncbi.nlm.nih.gov/35972577 https://pubmed.ncbi.nlm.nih.gov/35941836 https://pubmed.ncbi.nlm.nih.gov/35767654 https://pubmed.ncbi.nlm.nih.gov/35752978 https://pubmed.ncbi.nlm.nih.gov/35370009 https://pubmed.ncbi.nlm.nih.gov/35327643 https://pubmed.ncbi.nlm.nih.go…	https://pubmed.ncbi.nlm.nih.gov/36539521 https://pubmed.ncbi.nlm.nih.gov/36374812 https://pubmed.ncbi.nlm.nih.gov/36336217 https://pubmed.ncbi.nlm.nih.gov/36230572 https://pubmed.ncbi.nlm.nih.gov/36190000 https://pubmed.ncbi.nlm.nih.gov/36104590 https://pubmed.ncbi.nlm.nih.gov/35972577 https://pubmed.ncbi.nlm.nih.gov/35941836 https://pubmed.ncbi.nlm.nih.gov/35941702 https://pubmed.ncbi.nlm.nih.go…
ENSG00000099337	KCNK6	433.246	2.03539	3.80822e-11	6.11841e-09	Y	potassium two pore domain channel subfamily K member 6	K2p6.1, KCNK8, TOSS, TWIK-2, TWIK2	potassium channel subfamily K member 6|K2P6.1 potassium channel|TWIK-originated similarity sequence|TWIK-originated sodium similarity sequence|inward rectifying potassium channel protein TWIK-2|potassium channel, two pore domain subfamily K, member 6	potassium two pore domain channel subfamily K member 6	https://www.ensembl.org/Homo_sapiens/Gene/ExpressionAtlas?g=ENSG00000099337	http://www.ensembl.org/id/ENSG00000099337	https://www.ncbi.nlm.nih.gov/gene?term=(KCNK6[Gene Name]) AND Homo sapiens[Organism]	https://pubmed.ncbi.nlm.nih.gov/34826552 https://pubmed.ncbi.nlm.nih.gov/34337010 https://pubmed.ncbi.nlm.nih.gov/32512817 https://pubmed.ncbi.nlm.nih.gov/28899398 https://pubmed.ncbi.nlm.nih.gov/28381826 https://pubmed.ncbi.nlm.nih.gov/26655723 https://pubmed.ncbi.nlm.nih.gov/24579982 https://pubmed.ncbi.nlm.nih.gov/21964404 https://pubmed.ncbi.nlm.nih.gov/21911614 https://pubmed.ncbi.nlm.nih.go…	https://pubmed.ncbi.nlm.nih.gov/34826552 https://pubmed.ncbi.nlm.nih.gov/34337010 https://pubmed.ncbi.nlm.nih.gov/32512817 https://pubmed.ncbi.nlm.nih.gov/28899398 https://pubmed.ncbi.nlm.nih.gov/28381826 https://pubmed.ncbi.nlm.nih.gov/26655723 https://pubmed.ncbi.nlm.nih.gov/24579982 https://pubmed.ncbi.nlm.nih.gov/21964404 https://pubmed.ncbi.nlm.nih.gov/21911614 https://pubmed.ncbi.nlm.nih.go…	https://pubmed.ncbi.nlm.nih.gov/34826552 https://pubmed.ncbi.nlm.nih.gov/34337010 https://pubmed.ncbi.nlm.nih.gov/34195184 https://pubmed.ncbi.nlm.nih.gov/32860629 https://pubmed.ncbi.nlm.nih.gov/32742463 https://pubmed.ncbi.nlm.nih.gov/32512817 https://pubmed.ncbi.nlm.nih.gov/30632293 https://pubmed.ncbi.nlm.nih.gov/30246030 https://pubmed.ncbi.nlm.nih.gov/29958799 https://pubmed.ncbi.nlm.nih.go…
ENSG00000103241	FOXF1	568.731	2.23871	4.46296e-11	7.09791e-09	Y	forkhead box F1	ACDMPV, FKHL5, FREAC1	forkhead box protein F1|FREAC-1|Forkhead, drosophila, homolog-like 5|forkhead-related activator 1|forkhead-related protein FKHL5|forkhead-related transcription factor 1	forkhead box F1	https://www.ensembl.org/Homo_sapiens/Gene/ExpressionAtlas?g=ENSG00000103241	http://www.ensembl.org/id/ENSG00000103241	https://www.ncbi.nlm.nih.gov/gene?term=(FOXF1[Gene Name]) AND Homo sapiens[Organism]	https://pubmed.ncbi.nlm.nih.gov/36550414 https://pubmed.ncbi.nlm.nih.gov/36222666 https://pubmed.ncbi.nlm.nih.gov/36124617 https://pubmed.ncbi.nlm.nih.gov/35992538 https://pubmed.ncbi.nlm.nih.gov/35987251 https://pubmed.ncbi.nlm.nih.gov/35902696 https://pubmed.ncbi.nlm.nih.gov/35650195 https://pubmed.ncbi.nlm.nih.gov/35533956 https://pubmed.ncbi.nlm.nih.gov/35488049 https://pubmed.ncbi.nlm.nih.go…	https://pubmed.ncbi.nlm.nih.gov/36550414 https://pubmed.ncbi.nlm.nih.gov/36222666 https://pubmed.ncbi.nlm.nih.gov/36124617 https://pubmed.ncbi.nlm.nih.gov/35992538 https://pubmed.ncbi.nlm.nih.gov/35987251 https://pubmed.ncbi.nlm.nih.gov/35902696 https://pubmed.ncbi.nlm.nih.gov/35650195 https://pubmed.ncbi.nlm.nih.gov/35533956 https://pubmed.ncbi.nlm.nih.gov/35488049 https://pubmed.ncbi.nlm.nih.go…	https://pubmed.ncbi.nlm.nih.gov/36655574 https://pubmed.ncbi.nlm.nih.gov/36608259 https://pubmed.ncbi.nlm.nih.gov/36550414 https://pubmed.ncbi.nlm.nih.gov/36542853 https://pubmed.ncbi.nlm.nih.gov/36480964 https://pubmed.ncbi.nlm.nih.gov/36329475 https://pubmed.ncbi.nlm.nih.gov/36277750 https://pubmed.ncbi.nlm.nih.gov/36227576 https://pubmed.ncbi.nlm.nih.gov/36222666 https://pubmed.ncbi.nlm.nih.go…
ENSG00000118785	SPP1	234.152	-2.99895	4.68669e-11	7.37919e-09	Y	secreted phosphoprotein 1	BNSP, BSPI, ETA-1, OPN	osteopontin|SPP1/CALPHA1 fusion|early T-lymphocyte activation 1|lnc-PKD2-2-3|nephropontin|osteopontin/immunoglobulin alpha 1 heavy chain constant region fusion protein|secreted phosphoprotein 1 (osteopontin, bone sialoprotein I, early T-lymphocyte activation 1)|urinary stone protein|uropontin	secreted phosphoprotein 1	https://www.ensembl.org/Homo_sapiens/Gene/ExpressionAtlas?g=ENSG00000118785	http://www.ensembl.org/id/ENSG00000118785	https://www.ncbi.nlm.nih.gov/gene?term=(SPP1[Gene Name]) AND Homo sapiens[Organism]	https://pubmed.ncbi.nlm.nih.gov/36591806 https://pubmed.ncbi.nlm.nih.gov/36585688 https://pubmed.ncbi.nlm.nih.gov/36569898 https://pubmed.ncbi.nlm.nih.gov/36555673 https://pubmed.ncbi.nlm.nih.gov/36553600 https://pubmed.ncbi.nlm.nih.gov/36550414 https://pubmed.ncbi.nlm.nih.gov/36532065 https://pubmed.ncbi.nlm.nih.gov/36510962 https://pubmed.ncbi.nlm.nih.gov/36510497 https://pubmed.ncbi.nlm.nih.go…	https://pubmed.ncbi.nlm.nih.gov/36591806 https://pubmed.ncbi.nlm.nih.gov/36585688 https://pubmed.ncbi.nlm.nih.gov/36569898 https://pubmed.ncbi.nlm.nih.gov/36555673 https://pubmed.ncbi.nlm.nih.gov/36553600 https://pubmed.ncbi.nlm.nih.gov/36550414 https://pubmed.ncbi.nlm.nih.gov/36532065 https://pubmed.ncbi.nlm.nih.gov/36510962 https://pubmed.ncbi.nlm.nih.gov/36510497 https://pubmed.ncbi.nlm.nih.go…	https://pubmed.ncbi.nlm.nih.gov/36676937 https://pubmed.ncbi.nlm.nih.gov/36675807 https://pubmed.ncbi.nlm.nih.gov/36675700 https://pubmed.ncbi.nlm.nih.gov/36671569 https://pubmed.ncbi.nlm.nih.gov/36656712 https://pubmed.ncbi.nlm.nih.gov/36641075 https://pubmed.ncbi.nlm.nih.gov/36627902 https://pubmed.ncbi.nlm.nih.gov/36619982 https://pubmed.ncbi.nlm.nih.gov/36615677 https://pubmed.ncbi.nlm.nih.go…
ENSG00000170454	KRT75	79.5224	4.16756	5.06807e-11	7.90068e-09	Y	keratin 75	CK-75, K6HF, K75, KB18, PFB, hK6hf	keratin, type II cytoskeletal 75|cytokeratin type II|cytokeratin-75|keratin 75, type II|keratin-6 hair follicle|type II keratin-18|type II keratin-K6hf|type-II keratin Kb18	keratin 75	https://www.ensembl.org/Homo_sapiens/Gene/ExpressionAtlas?g=ENSG00000170454	http://www.ensembl.org/id/ENSG00000170454	https://www.ncbi.nlm.nih.gov/gene?term=(KRT75[Gene Name]) AND Homo sapiens[Organism]	https://pubmed.ncbi.nlm.nih.gov/34118380 https://pubmed.ncbi.nlm.nih.gov/31743516 https://pubmed.ncbi.nlm.nih.gov/31628189 https://pubmed.ncbi.nlm.nih.gov/31580512 https://pubmed.ncbi.nlm.nih.gov/30909744 https://pubmed.ncbi.nlm.nih.gov/30909328 https://pubmed.ncbi.nlm.nih.gov/27699474 https://pubmed.ncbi.nlm.nih.gov/26709044 https://pubmed.ncbi.nlm.nih.gov/26661294 https://pubmed.ncbi.nlm.nih.go…	https://pubmed.ncbi.nlm.nih.gov/34118380 https://pubmed.ncbi.nlm.nih.gov/31743516 https://pubmed.ncbi.nlm.nih.gov/31628189 https://pubmed.ncbi.nlm.nih.gov/31580512 https://pubmed.ncbi.nlm.nih.gov/30909744 https://pubmed.ncbi.nlm.nih.gov/30909328 https://pubmed.ncbi.nlm.nih.gov/27699474 https://pubmed.ncbi.nlm.nih.gov/26709044 https://pubmed.ncbi.nlm.nih.gov/26661294 https://pubmed.ncbi.nlm.nih.go…	https://pubmed.ncbi.nlm.nih.gov/36620220 https://pubmed.ncbi.nlm.nih.gov/36614000 https://pubmed.ncbi.nlm.nih.gov/36031017 https://pubmed.ncbi.nlm.nih.gov/34118380 https://pubmed.ncbi.nlm.nih.gov/33470013 https://pubmed.ncbi.nlm.nih.gov/33209196 https://pubmed.ncbi.nlm.nih.gov/33181250 https://pubmed.ncbi.nlm.nih.gov/33172478 https://pubmed.ncbi.nlm.nih.gov/31743516 https://pubmed.ncbi.nlm.nih.go…
ENSG00000168672	LRATD2	218.552	-2.38191	6.05906e-11	9.35294e-09	Y	LRAT domain containing 2	BCMP101, FAM84B, NSE2	protein LRATD2|breast cancer membrane protein 101|breast cancer membrane-associated protein 101|family with sequence similarity 84 member B|neurological/sensory 2|protein FAM84B	LRAT domain containing 2	https://www.ensembl.org/Homo_sapiens/Gene/ExpressionAtlas?g=ENSG00000168672	http://www.ensembl.org/id/ENSG00000168672	https://www.ncbi.nlm.nih.gov/gene?term=(LRATD2[Gene Name]) AND Homo sapiens[Organism]	https://pubmed.ncbi.nlm.nih.gov/34433667 https://pubmed.ncbi.nlm.nih.gov/34326338 https://pubmed.ncbi.nlm.nih.gov/33759248 https://pubmed.ncbi.nlm.nih.gov/32558489 https://pubmed.ncbi.nlm.nih.gov/32291380 https://pubmed.ncbi.nlm.nih.gov/32183428 https://pubmed.ncbi.nlm.nih.gov/30638658 https://pubmed.ncbi.nlm.nih.gov/28186973 https://pubmed.ncbi.nlm.nih.gov/26759717 https://pubmed.ncbi.nlm.nih.go…	https://pubmed.ncbi.nlm.nih.gov/34433667 https://pubmed.ncbi.nlm.nih.gov/34326338 https://pubmed.ncbi.nlm.nih.gov/33759248 https://pubmed.ncbi.nlm.nih.gov/32558489 https://pubmed.ncbi.nlm.nih.gov/32291380 https://pubmed.ncbi.nlm.nih.gov/32183428 https://pubmed.ncbi.nlm.nih.gov/30638658 https://pubmed.ncbi.nlm.nih.gov/28186973 https://pubmed.ncbi.nlm.nih.gov/26759717 https://pubmed.ncbi.nlm.nih.go…	https://pubmed.ncbi.nlm.nih.gov/34956690 https://pubmed.ncbi.nlm.nih.gov/34433667 https://pubmed.ncbi.nlm.nih.gov/34326338 https://pubmed.ncbi.nlm.nih.gov/33759248 https://pubmed.ncbi.nlm.nih.gov/32558489 https://pubmed.ncbi.nlm.nih.gov/32291380 https://pubmed.ncbi.nlm.nih.gov/32183428 https://pubmed.ncbi.nlm.nih.gov/30638658 https://pubmed.ncbi.nlm.nih.gov/30526553 https://pubmed.ncbi.nlm.nih.go…
ENSG00000052850	ALX4	125.528	-2.80751	7.33791e-11	1.1217e-08	Y	ALX homeobox 4	CRS5, FND2	homeobox protein aristaless-like 4|aristaless-like homeobox 4|homeodomain transcription factor ALX4	ALX homeobox 4	https://www.ensembl.org/Homo_sapiens/Gene/ExpressionAtlas?g=ENSG00000052850	http://www.ensembl.org/id/ENSG00000052850	https://www.ncbi.nlm.nih.gov/gene?term=(ALX4[Gene Name]) AND Homo sapiens[Organism]	https://pubmed.ncbi.nlm.nih.gov/36555772 https://pubmed.ncbi.nlm.nih.gov/35477541 https://pubmed.ncbi.nlm.nih.gov/34586326 https://pubmed.ncbi.nlm.nih.gov/34315693 https://pubmed.ncbi.nlm.nih.gov/34218733 https://pubmed.ncbi.nlm.nih.gov/34098755 https://pubmed.ncbi.nlm.nih.gov/33949667 https://pubmed.ncbi.nlm.nih.gov/33836758 https://pubmed.ncbi.nlm.nih.gov/33781094 https://pubmed.ncbi.nlm.nih.go…	https://pubmed.ncbi.nlm.nih.gov/36555772 https://pubmed.ncbi.nlm.nih.gov/35477541 https://pubmed.ncbi.nlm.nih.gov/34586326 https://pubmed.ncbi.nlm.nih.gov/34315693 https://pubmed.ncbi.nlm.nih.gov/34218733 https://pubmed.ncbi.nlm.nih.gov/34098755 https://pubmed.ncbi.nlm.nih.gov/33949667 https://pubmed.ncbi.nlm.nih.gov/33836758 https://pubmed.ncbi.nlm.nih.gov/33781094 https://pubmed.ncbi.nlm.nih.go…	https://pubmed.ncbi.nlm.nih.gov/36585373 https://pubmed.ncbi.nlm.nih.gov/36555772 https://pubmed.ncbi.nlm.nih.gov/36292693 https://pubmed.ncbi.nlm.nih.gov/36203090 https://pubmed.ncbi.nlm.nih.gov/36158052 https://pubmed.ncbi.nlm.nih.gov/35694087 https://pubmed.ncbi.nlm.nih.gov/35692084 https://pubmed.ncbi.nlm.nih.gov/35477541 https://pubmed.ncbi.nlm.nih.gov/35127681 https://pubmed.ncbi.nlm.nih.go…
ENSG00000187583	PLEKHN1	158.379	2.47024	1.11878e-10	1.69377e-08	Y	pleckstrin homology domain containing N1	CLPABP	pleckstrin homology domain-containing family N member 1|PH domain-containing family N member 1|cardiolipin and phosphatidic acid-binding protein	pleckstrin homology domain containing N1	https://www.ensembl.org/Homo_sapiens/Gene/ExpressionAtlas?g=ENSG00000187583	http://www.ensembl.org/id/ENSG00000187583	https://www.ncbi.nlm.nih.gov/gene?term=(PLEKHN1[Gene Name]) AND Homo sapiens[Organism]	https://pubmed.ncbi.nlm.nih.gov/29433439 https://pubmed.ncbi.nlm.nih.gov/29180010 https://pubmed.ncbi.nlm.nih.gov/28912426 https://pubmed.ncbi.nlm.nih.gov/26227905 https://pubmed.ncbi.nlm.nih.gov/23848590 https://pubmed.ncbi.nlm.nih.gov/20371988 https://pubmed.ncbi.nlm.nih.gov/18191643	https://pubmed.ncbi.nlm.nih.gov/29433439 https://pubmed.ncbi.nlm.nih.gov/29180010 https://pubmed.ncbi.nlm.nih.gov/28912426 https://pubmed.ncbi.nlm.nih.gov/26227905 https://pubmed.ncbi.nlm.nih.gov/23848590 https://pubmed.ncbi.nlm.nih.gov/20371988 https://pubmed.ncbi.nlm.nih.gov/18191643	https://pubmed.ncbi.nlm.nih.gov/33884296 https://pubmed.ncbi.nlm.nih.gov/33510632 https://pubmed.ncbi.nlm.nih.gov/29989002 https://pubmed.ncbi.nlm.nih.gov/29531808 https://pubmed.ncbi.nlm.nih.gov/29433439 https://pubmed.ncbi.nlm.nih.gov/29180010 https://pubmed.ncbi.nlm.nih.gov/28912426 https://pubmed.ncbi.nlm.nih.gov/26227905 https://pubmed.ncbi.nlm.nih.gov/23848590 https://pubmed.ncbi.nlm.nih.go…
ENSG00000081923	ATP8B1	97.515	-3.16924	1.18914e-10	1.74981e-08	Y	ATPase phospholipid transporting 8B1	ATPIC, BRIC, FIC1, ICP1, PFIC, PFIC1	phospholipid-transporting ATPase IC|ATPase, aminophospholipid transporter, class I, type 8B, member 1|ATPase, class I, type 8B, member 1|E1-E2 ATPase|P4-ATPase flippase complex alpha subunit ATP8B1|familial intrahepatic cholestasis type 1|probable phospholipid-transporting ATPase IC	ATPase phospholipid transporting 8B1	https://www.ensembl.org/Homo_sapiens/Gene/ExpressionAtlas?g=ENSG00000081923	http://www.ensembl.org/id/ENSG00000081923	https://www.ncbi.nlm.nih.gov/gene?term=(ATP8B1[Gene Name]) AND Homo sapiens[Organism]	https://pubmed.ncbi.nlm.nih.gov/36293199 https://pubmed.ncbi.nlm.nih.gov/35894240 https://pubmed.ncbi.nlm.nih.gov/35879413 https://pubmed.ncbi.nlm.nih.gov/35585825 https://pubmed.ncbi.nlm.nih.gov/35416773 https://pubmed.ncbi.nlm.nih.gov/35349344 https://pubmed.ncbi.nlm.nih.gov/35204783 https://pubmed.ncbi.nlm.nih.gov/35184362 https://pubmed.ncbi.nlm.nih.gov/35132767 https://pubmed.ncbi.nlm.nih.go…	https://pubmed.ncbi.nlm.nih.gov/36293199 https://pubmed.ncbi.nlm.nih.gov/35894240 https://pubmed.ncbi.nlm.nih.gov/35879413 https://pubmed.ncbi.nlm.nih.gov/35585825 https://pubmed.ncbi.nlm.nih.gov/35416773 https://pubmed.ncbi.nlm.nih.gov/35349344 https://pubmed.ncbi.nlm.nih.gov/35204783 https://pubmed.ncbi.nlm.nih.gov/35184362 https://pubmed.ncbi.nlm.nih.gov/35132767 https://pubmed.ncbi.nlm.nih.go…	https://pubmed.ncbi.nlm.nih.gov/36348462 https://pubmed.ncbi.nlm.nih.gov/36344486 https://pubmed.ncbi.nlm.nih.gov/36293199 https://pubmed.ncbi.nlm.nih.gov/36273194 https://pubmed.ncbi.nlm.nih.gov/36169099 https://pubmed.ncbi.nlm.nih.gov/36108118 https://pubmed.ncbi.nlm.nih.gov/35894240 https://pubmed.ncbi.nlm.nih.gov/35879413 https://pubmed.ncbi.nlm.nih.gov/35807162 https://pubmed.ncbi.nlm.nih.go…
ENSG00000151651	ADAM8	354.52	2.20286	1.33351e-10	1.94408e-08	Y	ADAM metallopeptidase domain 8	CD156, CD156a, MS2	disintegrin and metalloproteinase domain-containing protein 8|a disintegrin and metalloproteinase domain 8|cell surface antigen MS2|human leukocyte differentiation antigen	ADAM metallopeptidase domain 8	https://www.ensembl.org/Homo_sapiens/Gene/ExpressionAtlas?g=ENSG00000151651	http://www.ensembl.org/id/ENSG00000151651	https://www.ncbi.nlm.nih.gov/gene?term=(ADAM8[Gene Name]) AND Homo sapiens[Organism]	https://pubmed.ncbi.nlm.nih.gov/36473427 https://pubmed.ncbi.nlm.nih.gov/36231102 https://pubmed.ncbi.nlm.nih.gov/35767190 https://pubmed.ncbi.nlm.nih.gov/35325079 https://pubmed.ncbi.nlm.nih.gov/35216088 https://pubmed.ncbi.nlm.nih.gov/35132956 https://pubmed.ncbi.nlm.nih.gov/35103068 https://pubmed.ncbi.nlm.nih.gov/35031764 https://pubmed.ncbi.nlm.nih.gov/34956566 https://pubmed.ncbi.nlm.nih.go…	https://pubmed.ncbi.nlm.nih.gov/36473427 https://pubmed.ncbi.nlm.nih.gov/36231102 https://pubmed.ncbi.nlm.nih.gov/35767190 https://pubmed.ncbi.nlm.nih.gov/35325079 https://pubmed.ncbi.nlm.nih.gov/35216088 https://pubmed.ncbi.nlm.nih.gov/35132956 https://pubmed.ncbi.nlm.nih.gov/35103068 https://pubmed.ncbi.nlm.nih.gov/35031764 https://pubmed.ncbi.nlm.nih.gov/34956566 https://pubmed.ncbi.nlm.nih.go…	https://pubmed.ncbi.nlm.nih.gov/36473427 https://pubmed.ncbi.nlm.nih.gov/36231102 https://pubmed.ncbi.nlm.nih.gov/36230833 https://pubmed.ncbi.nlm.nih.gov/35860566 https://pubmed.ncbi.nlm.nih.gov/35777340 https://pubmed.ncbi.nlm.nih.gov/35767190 https://pubmed.ncbi.nlm.nih.gov/35565436 https://pubmed.ncbi.nlm.nih.gov/35371977 https://pubmed.ncbi.nlm.nih.gov/35325079 https://pubmed.ncbi.nlm.nih.go…
ENSG00000134215	VAV3	159.201	-2.73943	1.59451e-10	2.30326e-08	Y	vav guanine nucleotide exchange factor 3		guanine nucleotide exchange factor VAV3|VAV-3|vav 3 guanine nucleotide exchange factor|vav 3 oncogene	vav guanine nucleotide exchange factor 3	https://www.ensembl.org/Homo_sapiens/Gene/ExpressionAtlas?g=ENSG00000134215	http://www.ensembl.org/id/ENSG00000134215	https://www.ncbi.nlm.nih.gov/gene?term=(VAV3[Gene Name]) AND Homo sapiens[Organism]	https://pubmed.ncbi.nlm.nih.gov/36460706 https://pubmed.ncbi.nlm.nih.gov/35650206 https://pubmed.ncbi.nlm.nih.gov/35434450 https://pubmed.ncbi.nlm.nih.gov/35100979 https://pubmed.ncbi.nlm.nih.gov/34894858 https://pubmed.ncbi.nlm.nih.gov/34711926 https://pubmed.ncbi.nlm.nih.gov/34711612 https://pubmed.ncbi.nlm.nih.gov/34431498 https://pubmed.ncbi.nlm.nih.gov/34292486 https://pubmed.ncbi.nlm.nih.go…	https://pubmed.ncbi.nlm.nih.gov/36460706 https://pubmed.ncbi.nlm.nih.gov/35650206 https://pubmed.ncbi.nlm.nih.gov/35434450 https://pubmed.ncbi.nlm.nih.gov/35100979 https://pubmed.ncbi.nlm.nih.gov/34894858 https://pubmed.ncbi.nlm.nih.gov/34711926 https://pubmed.ncbi.nlm.nih.gov/34711612 https://pubmed.ncbi.nlm.nih.gov/34431498 https://pubmed.ncbi.nlm.nih.gov/34292486 https://pubmed.ncbi.nlm.nih.go…	https://pubmed.ncbi.nlm.nih.gov/36602863 https://pubmed.ncbi.nlm.nih.gov/36539408 https://pubmed.ncbi.nlm.nih.gov/36531963 https://pubmed.ncbi.nlm.nih.gov/36513558 https://pubmed.ncbi.nlm.nih.gov/36460706 https://pubmed.ncbi.nlm.nih.gov/36303550 https://pubmed.ncbi.nlm.nih.gov/36277487 https://pubmed.ncbi.nlm.nih.gov/36142758 https://pubmed.ncbi.nlm.nih.gov/35795203 https://pubmed.ncbi.nlm.nih.go…
ENSG00000137819	PAQR5	263.321	2.10679	1.71936e-10	2.46103e-08	Y	progestin and adipoQ receptor family member 5	MPRG	membrane progestin receptor gamma|mPR gamma|membrane progesterone P4 receptor gamma|membrane progesterone receptor gamma|progesterone and adipoQ receptor family member 5|progestin and adipoQ receptor family member V	progestin and adipoQ receptor family member 5	https://www.ensembl.org/Homo_sapiens/Gene/ExpressionAtlas?g=ENSG00000137819	http://www.ensembl.org/id/ENSG00000137819	https://www.ncbi.nlm.nih.gov/gene?term=(PAQR5[Gene Name]) AND Homo sapiens[Organism]	https://pubmed.ncbi.nlm.nih.gov/34572596 https://pubmed.ncbi.nlm.nih.gov/32733932 https://pubmed.ncbi.nlm.nih.gov/29353001 https://pubmed.ncbi.nlm.nih.gov/24012561 https://pubmed.ncbi.nlm.nih.gov/23763432 https://pubmed.ncbi.nlm.nih.gov/23161870 https://pubmed.ncbi.nlm.nih.gov/21761364	https://pubmed.ncbi.nlm.nih.gov/34572596 https://pubmed.ncbi.nlm.nih.gov/32733932 https://pubmed.ncbi.nlm.nih.gov/29353001 https://pubmed.ncbi.nlm.nih.gov/24012561 https://pubmed.ncbi.nlm.nih.gov/23763432 https://pubmed.ncbi.nlm.nih.gov/23161870 https://pubmed.ncbi.nlm.nih.gov/21761364	https://pubmed.ncbi.nlm.nih.gov/36268056 https://pubmed.ncbi.nlm.nih.gov/36119517 https://pubmed.ncbi.nlm.nih.gov/35127538 https://pubmed.ncbi.nlm.nih.gov/35071405 https://pubmed.ncbi.nlm.nih.gov/34572596 https://pubmed.ncbi.nlm.nih.gov/33752795 https://pubmed.ncbi.nlm.nih.gov/33073401 https://pubmed.ncbi.nlm.nih.gov/32733932 https://pubmed.ncbi.nlm.nih.gov/32169627 https://pubmed.ncbi.nlm.nih.go…
ENSG00000185215	TNFAIP2	256.229	-2.34458	1.82011e-10	2.58177e-08	Y	TNF alpha induced protein 2	B94, EXOC3L3	tumor necrosis factor alpha-induced protein 2|exocyst complex component 3-like 3|primary response gene B94 protein|tumor necrosis factor, alpha induced protein 2	TNF alpha induced protein 2	https://www.ensembl.org/Homo_sapiens/Gene/ExpressionAtlas?g=ENSG00000185215	http://www.ensembl.org/id/ENSG00000185215	https://www.ncbi.nlm.nih.gov/gene?term=(TNFAIP2[Gene Name]) AND Homo sapiens[Organism]	https://pubmed.ncbi.nlm.nih.gov/36254562 https://pubmed.ncbi.nlm.nih.gov/36243694 https://pubmed.ncbi.nlm.nih.gov/35659195 https://pubmed.ncbi.nlm.nih.gov/35401528 https://pubmed.ncbi.nlm.nih.gov/35275449 https://pubmed.ncbi.nlm.nih.gov/34339468 https://pubmed.ncbi.nlm.nih.gov/34112215 https://pubmed.ncbi.nlm.nih.gov/33587010 https://pubmed.ncbi.nlm.nih.gov/33109108 https://pubmed.ncbi.nlm.nih.go…	https://pubmed.ncbi.nlm.nih.gov/36254562 https://pubmed.ncbi.nlm.nih.gov/36243694 https://pubmed.ncbi.nlm.nih.gov/35659195 https://pubmed.ncbi.nlm.nih.gov/35401528 https://pubmed.ncbi.nlm.nih.gov/35275449 https://pubmed.ncbi.nlm.nih.gov/34339468 https://pubmed.ncbi.nlm.nih.gov/34112215 https://pubmed.ncbi.nlm.nih.gov/33587010 https://pubmed.ncbi.nlm.nih.gov/33109108 https://pubmed.ncbi.nlm.nih.go…	https://pubmed.ncbi.nlm.nih.gov/36428603 https://pubmed.ncbi.nlm.nih.gov/36313746 https://pubmed.ncbi.nlm.nih.gov/36254562 https://pubmed.ncbi.nlm.nih.gov/36243694 https://pubmed.ncbi.nlm.nih.gov/36140707 https://pubmed.ncbi.nlm.nih.gov/36084515 https://pubmed.ncbi.nlm.nih.gov/35659195 https://pubmed.ncbi.nlm.nih.gov/35401528 https://pubmed.ncbi.nlm.nih.gov/35275449 https://pubmed.ncbi.nlm.nih.go…
ENSG00000185352	HS6ST3	140.502	2.57039	2.01193e-10	2.82838e-08	Y	heparan sulfate 6-O-sulfotransferase 3	HS6ST-3	heparan-sulfate 6-O-sulfotransferase 3	heparan sulfate 6-O-sulfotransferase 3	https://www.ensembl.org/Homo_sapiens/Gene/ExpressionAtlas?g=ENSG00000185352	http://www.ensembl.org/id/ENSG00000185352	https://www.ncbi.nlm.nih.gov/gene?term=(HS6ST3[Gene Name]) AND Homo sapiens[Organism]	https://pubmed.ncbi.nlm.nih.gov/32147644 https://pubmed.ncbi.nlm.nih.gov/31320595 https://pubmed.ncbi.nlm.nih.gov/28017727 https://pubmed.ncbi.nlm.nih.gov/27863428 https://pubmed.ncbi.nlm.nih.gov/26330360 https://pubmed.ncbi.nlm.nih.gov/24412195 https://pubmed.ncbi.nlm.nih.gov/24371161 https://pubmed.ncbi.nlm.nih.gov/23563607 https://pubmed.ncbi.nlm.nih.gov/22903264 https://pubmed.ncbi.nlm.nih.go…	https://pubmed.ncbi.nlm.nih.gov/32147644 https://pubmed.ncbi.nlm.nih.gov/31320595 https://pubmed.ncbi.nlm.nih.gov/28017727 https://pubmed.ncbi.nlm.nih.gov/27863428 https://pubmed.ncbi.nlm.nih.gov/26330360 https://pubmed.ncbi.nlm.nih.gov/24412195 https://pubmed.ncbi.nlm.nih.gov/24371161 https://pubmed.ncbi.nlm.nih.gov/23563607 https://pubmed.ncbi.nlm.nih.gov/22903264 https://pubmed.ncbi.nlm.nih.go…	https://pubmed.ncbi.nlm.nih.gov/35447249 https://pubmed.ncbi.nlm.nih.gov/35205240 https://pubmed.ncbi.nlm.nih.gov/32147644 https://pubmed.ncbi.nlm.nih.gov/31921621 https://pubmed.ncbi.nlm.nih.gov/31320595 https://pubmed.ncbi.nlm.nih.gov/30472903 https://pubmed.ncbi.nlm.nih.gov/28017727 https://pubmed.ncbi.nlm.nih.gov/27863428 https://pubmed.ncbi.nlm.nih.gov/26330360 https://pubmed.ncbi.nlm.nih.go…
ENSG00000153714	LURAP1L	114.167	2.70971	2.03973e-10	2.84208e-08	Y	leucine rich adaptor protein 1 like	C9orf150, HYST0841, LRAP35b, bA3L8.2	leucine rich adaptor protein 1-like|leucine repeat adaptor protein 35b	leucine rich adaptor protein 1 like	https://www.ensembl.org/Homo_sapiens/Gene/ExpressionAtlas?g=ENSG00000153714	http://www.ensembl.org/id/ENSG00000153714	https://www.ncbi.nlm.nih.gov/gene?term=(LURAP1L[Gene Name]) AND Homo sapiens[Organism]			https://pubmed.ncbi.nlm.nih.gov/36247256 https://pubmed.ncbi.nlm.nih.gov/35910207 https://pubmed.ncbi.nlm.nih.gov/34702254 https://pubmed.ncbi.nlm.nih.gov/34079593 https://pubmed.ncbi.nlm.nih.gov/33797169 https://pubmed.ncbi.nlm.nih.gov/29740082
ENSG00000177283	FZD8	626.085	2.01423	2.18783e-10	3.0217e-08	Y	frizzled class receptor 8	FZ-8, hFZ8	frizzled-8|frizzled 8, seven transmembrane spanning receptor|frizzled family receptor 8|frizzled homolog 8	frizzled class receptor 8	https://www.ensembl.org/Homo_sapiens/Gene/ExpressionAtlas?g=ENSG00000177283	http://www.ensembl.org/id/ENSG00000177283	https://www.ncbi.nlm.nih.gov/gene?term=(FZD8[Gene Name]) AND Homo sapiens[Organism]	https://pubmed.ncbi.nlm.nih.gov/36219823 https://pubmed.ncbi.nlm.nih.gov/36156078 https://pubmed.ncbi.nlm.nih.gov/36127685 https://pubmed.ncbi.nlm.nih.gov/36056132 https://pubmed.ncbi.nlm.nih.gov/35675627 https://pubmed.ncbi.nlm.nih.gov/34677810 https://pubmed.ncbi.nlm.nih.gov/34108309 https://pubmed.ncbi.nlm.nih.gov/34028782 https://pubmed.ncbi.nlm.nih.gov/33618713 https://pubmed.ncbi.nlm.nih.go…	https://pubmed.ncbi.nlm.nih.gov/36219823 https://pubmed.ncbi.nlm.nih.gov/36156078 https://pubmed.ncbi.nlm.nih.gov/36127685 https://pubmed.ncbi.nlm.nih.gov/36056132 https://pubmed.ncbi.nlm.nih.gov/35675627 https://pubmed.ncbi.nlm.nih.gov/34677810 https://pubmed.ncbi.nlm.nih.gov/34108309 https://pubmed.ncbi.nlm.nih.gov/34028782 https://pubmed.ncbi.nlm.nih.gov/33618713 https://pubmed.ncbi.nlm.nih.go…	https://pubmed.ncbi.nlm.nih.gov/36618022 https://pubmed.ncbi.nlm.nih.gov/36336221 https://pubmed.ncbi.nlm.nih.gov/36219823 https://pubmed.ncbi.nlm.nih.gov/36156078 https://pubmed.ncbi.nlm.nih.gov/36127685 https://pubmed.ncbi.nlm.nih.gov/36056132 https://pubmed.ncbi.nlm.nih.gov/36047789 https://pubmed.ncbi.nlm.nih.gov/35859793 https://pubmed.ncbi.nlm.nih.gov/35675627 https://pubmed.ncbi.nlm.nih.go…
ENSG00000102174	PHEX	69.739	-4.39248	2.23359e-10	3.05808e-08	Y	phosphate regulating endopeptidase X-linked	HPDR, HPDR1, HYP, HYP1, LXHR, PEX, XLH	phosphate-regulating neutral endopeptidase PHEX|PHEX peptidase|X-linked hypophosphatemia protein|metalloendopeptidase homolog PEX|phosphate regulating endopeptidase homolog X-linked|phosphate regulating gene with homologies to endopeptidases on the X chromosome (hypophosphatemia, vitamin D resistant rickets)|vitamin D-resistant hypophosphatemic rickets protein	phosphate regulating endopeptidase X-linked	https://www.ensembl.org/Homo_sapiens/Gene/ExpressionAtlas?g=ENSG00000102174	http://www.ensembl.org/id/ENSG00000102174	https://www.ncbi.nlm.nih.gov/gene?term=(PHEX[Gene Name]) AND Homo sapiens[Organism]	https://pubmed.ncbi.nlm.nih.gov/36553684 https://pubmed.ncbi.nlm.nih.gov/36482408 https://pubmed.ncbi.nlm.nih.gov/36446330 https://pubmed.ncbi.nlm.nih.gov/36382755 https://pubmed.ncbi.nlm.nih.gov/36351286 https://pubmed.ncbi.nlm.nih.gov/36060934 https://pubmed.ncbi.nlm.nih.gov/36051396 https://pubmed.ncbi.nlm.nih.gov/36011303 https://pubmed.ncbi.nlm.nih.gov/35929938 https://pubmed.ncbi.nlm.nih.go…	https://pubmed.ncbi.nlm.nih.gov/36553684 https://pubmed.ncbi.nlm.nih.gov/36482408 https://pubmed.ncbi.nlm.nih.gov/36446330 https://pubmed.ncbi.nlm.nih.gov/36382755 https://pubmed.ncbi.nlm.nih.gov/36351286 https://pubmed.ncbi.nlm.nih.gov/36060934 https://pubmed.ncbi.nlm.nih.gov/36051396 https://pubmed.ncbi.nlm.nih.gov/36011303 https://pubmed.ncbi.nlm.nih.gov/35929938 https://pubmed.ncbi.nlm.nih.go…	https://pubmed.ncbi.nlm.nih.gov/36672821 https://pubmed.ncbi.nlm.nih.gov/36553684 https://pubmed.ncbi.nlm.nih.gov/36542147 https://pubmed.ncbi.nlm.nih.gov/36530187 https://pubmed.ncbi.nlm.nih.gov/36482408 https://pubmed.ncbi.nlm.nih.gov/36481511 https://pubmed.ncbi.nlm.nih.gov/36446330 https://pubmed.ncbi.nlm.nih.gov/36382755 https://pubmed.ncbi.nlm.nih.gov/36370455 https://pubmed.ncbi.nlm.nih.go…
ENSG00000184254	ALDH1A3	3023.88	2.40032	2.29025e-10	3.10862e-08	Y	aldehyde dehydrogenase 1 family member A3	ALDH1A6, ALDH6, MCOP8, RALDH3	aldehyde dehydrogenase family 1 member A3|acetaldehyde dehydrogenase 6|aldehyde dehydrogenase 6|retinaldehyde dehydrogenase 3	aldehyde dehydrogenase 1 family member A3	https://www.ensembl.org/Homo_sapiens/Gene/ExpressionAtlas?g=ENSG00000184254	http://www.ensembl.org/id/ENSG00000184254	https://www.ncbi.nlm.nih.gov/gene?term=(ALDH1A3[Gene Name]) AND Homo sapiens[Organism]	https://pubmed.ncbi.nlm.nih.gov/36672441 https://pubmed.ncbi.nlm.nih.gov/36552781 https://pubmed.ncbi.nlm.nih.gov/36550414 https://pubmed.ncbi.nlm.nih.gov/36335879 https://pubmed.ncbi.nlm.nih.gov/36288878 https://pubmed.ncbi.nlm.nih.gov/36148682 https://pubmed.ncbi.nlm.nih.gov/36050388 https://pubmed.ncbi.nlm.nih.gov/35986343 https://pubmed.ncbi.nlm.nih.gov/35953196 https://pubmed.ncbi.nlm.nih.go…	https://pubmed.ncbi.nlm.nih.gov/36672441 https://pubmed.ncbi.nlm.nih.gov/36552781 https://pubmed.ncbi.nlm.nih.gov/36550414 https://pubmed.ncbi.nlm.nih.gov/36335879 https://pubmed.ncbi.nlm.nih.gov/36288878 https://pubmed.ncbi.nlm.nih.gov/36148682 https://pubmed.ncbi.nlm.nih.gov/36050388 https://pubmed.ncbi.nlm.nih.gov/35986343 https://pubmed.ncbi.nlm.nih.gov/35953196 https://pubmed.ncbi.nlm.nih.go…	https://pubmed.ncbi.nlm.nih.gov/36672441 https://pubmed.ncbi.nlm.nih.gov/36557283 https://pubmed.ncbi.nlm.nih.gov/36552781 https://pubmed.ncbi.nlm.nih.gov/36550414 https://pubmed.ncbi.nlm.nih.gov/36405550 https://pubmed.ncbi.nlm.nih.gov/36336324 https://pubmed.ncbi.nlm.nih.gov/36335879 https://pubmed.ncbi.nlm.nih.gov/36335641 https://pubmed.ncbi.nlm.nih.gov/36334047 https://pubmed.ncbi.nlm.nih.go…
ENSG00000112297	CRYBG1	1649	-2.32246	2.43295e-10	3.27408e-08	Y	crystallin beta-gamma domain containing 1	AIM1, ST4	beta/gamma crystallin domain-containing protein 1|absent in melanoma 1 protein|beta-gamma crystallin domain containing 1|suppression of tumorigenicity 4 (malignant melanoma)	crystallin beta-gamma domain containing 1	https://www.ensembl.org/Homo_sapiens/Gene/ExpressionAtlas?g=ENSG00000112297	http://www.ensembl.org/id/ENSG00000112297	https://www.ncbi.nlm.nih.gov/gene?term=(CRYBG1[Gene Name]) AND Homo sapiens[Organism]	https://pubmed.ncbi.nlm.nih.gov/28747635 https://pubmed.ncbi.nlm.nih.gov/24094292 https://pubmed.ncbi.nlm.nih.gov/22801494 https://pubmed.ncbi.nlm.nih.gov/22761906 https://pubmed.ncbi.nlm.nih.gov/22510872 https://pubmed.ncbi.nlm.nih.gov/22402438 https://pubmed.ncbi.nlm.nih.gov/22127895 https://pubmed.ncbi.nlm.nih.gov/19194464 https://pubmed.ncbi.nlm.nih.gov/16965274 https://pubmed.ncbi.nlm.nih.go…	https://pubmed.ncbi.nlm.nih.gov/28747635 https://pubmed.ncbi.nlm.nih.gov/24094292 https://pubmed.ncbi.nlm.nih.gov/22801494 https://pubmed.ncbi.nlm.nih.gov/22761906 https://pubmed.ncbi.nlm.nih.gov/22510872 https://pubmed.ncbi.nlm.nih.gov/22402438 https://pubmed.ncbi.nlm.nih.gov/22127895 https://pubmed.ncbi.nlm.nih.gov/19194464 https://pubmed.ncbi.nlm.nih.gov/16965274 https://pubmed.ncbi.nlm.nih.go…	https://pubmed.ncbi.nlm.nih.gov/30544954 https://pubmed.ncbi.nlm.nih.gov/28747635 https://pubmed.ncbi.nlm.nih.gov/24094292 https://pubmed.ncbi.nlm.nih.gov/22801494 https://pubmed.ncbi.nlm.nih.gov/22761906 https://pubmed.ncbi.nlm.nih.gov/22510872 https://pubmed.ncbi.nlm.nih.gov/22402438 https://pubmed.ncbi.nlm.nih.gov/22127895 https://pubmed.ncbi.nlm.nih.gov/19194464 https://pubmed.ncbi.nlm.nih.go…
ENSG00000149212	SESN3	234.953	-2.46502	2.75207e-10	3.67215e-08	Y	sestrin 3	SEST3	sestrin-3	sestrin 3	https://www.ensembl.org/Homo_sapiens/Gene/ExpressionAtlas?g=ENSG00000149212	http://www.ensembl.org/id/ENSG00000149212	https://www.ncbi.nlm.nih.gov/gene?term=(SESN3[Gene Name]) AND Homo sapiens[Organism]	https://pubmed.ncbi.nlm.nih.gov/36400759 https://pubmed.ncbi.nlm.nih.gov/34699320 https://pubmed.ncbi.nlm.nih.gov/34409922 https://pubmed.ncbi.nlm.nih.gov/33508370 https://pubmed.ncbi.nlm.nih.gov/33346776 https://pubmed.ncbi.nlm.nih.gov/33082554 https://pubmed.ncbi.nlm.nih.gov/32966727 https://pubmed.ncbi.nlm.nih.gov/32626541 https://pubmed.ncbi.nlm.nih.gov/31929512 https://pubmed.ncbi.nlm.nih.go…	https://pubmed.ncbi.nlm.nih.gov/36400759 https://pubmed.ncbi.nlm.nih.gov/34699320 https://pubmed.ncbi.nlm.nih.gov/34409922 https://pubmed.ncbi.nlm.nih.gov/33508370 https://pubmed.ncbi.nlm.nih.gov/33346776 https://pubmed.ncbi.nlm.nih.gov/33082554 https://pubmed.ncbi.nlm.nih.gov/32966727 https://pubmed.ncbi.nlm.nih.gov/32626541 https://pubmed.ncbi.nlm.nih.gov/31929512 https://pubmed.ncbi.nlm.nih.go…	https://pubmed.ncbi.nlm.nih.gov/36400759 https://pubmed.ncbi.nlm.nih.gov/36341561 https://pubmed.ncbi.nlm.nih.gov/36338967 https://pubmed.ncbi.nlm.nih.gov/36220588 https://pubmed.ncbi.nlm.nih.gov/36203142 https://pubmed.ncbi.nlm.nih.gov/35954183 https://pubmed.ncbi.nlm.nih.gov/35947892 https://pubmed.ncbi.nlm.nih.gov/35811409 https://pubmed.ncbi.nlm.nih.gov/35256743 https://pubmed.ncbi.nlm.nih.go…
ENSG00000177301	KCNA2	61.6839	-4.51896	3.6378e-10	4.8132e-08	Y	potassium voltage-gated channel subfamily A member 2	DEE32, EIEE32, HBK5, HK4, HUKIV, KV1.2, MK2, NGK1, RBK2	potassium voltage-gated channel subfamily A member 2|potassium channel, voltage gated shaker related subfamily A, member 2|potassium voltage-gated channel, shaker-related subfamily, member 2|voltage-gated K(+) channel HuKIV|voltage-gated potassium channel HBK5|voltage-gated potassium channel protein Kv1.2|voltage-gated potassium channel subunit Kv1.2	potassium voltage-gated channel subfamily A member 2	https://www.ensembl.org/Homo_sapiens/Gene/ExpressionAtlas?g=ENSG00000177301	http://www.ensembl.org/id/ENSG00000177301	https://www.ncbi.nlm.nih.gov/gene?term=(KCNA2[Gene Name]) AND Homo sapiens[Organism]	https://pubmed.ncbi.nlm.nih.gov/36430572 https://pubmed.ncbi.nlm.nih.gov/36225112 https://pubmed.ncbi.nlm.nih.gov/35808924 https://pubmed.ncbi.nlm.nih.gov/35439054 https://pubmed.ncbi.nlm.nih.gov/35219921 https://pubmed.ncbi.nlm.nih.gov/34576077 https://pubmed.ncbi.nlm.nih.gov/34516822 https://pubmed.ncbi.nlm.nih.gov/34101221 https://pubmed.ncbi.nlm.nih.gov/33837257 https://pubmed.ncbi.nlm.nih.go…	https://pubmed.ncbi.nlm.nih.gov/36430572 https://pubmed.ncbi.nlm.nih.gov/36225112 https://pubmed.ncbi.nlm.nih.gov/35808924 https://pubmed.ncbi.nlm.nih.gov/35439054 https://pubmed.ncbi.nlm.nih.gov/35219921 https://pubmed.ncbi.nlm.nih.gov/34576077 https://pubmed.ncbi.nlm.nih.gov/34516822 https://pubmed.ncbi.nlm.nih.gov/34101221 https://pubmed.ncbi.nlm.nih.gov/33837257 https://pubmed.ncbi.nlm.nih.go…	https://pubmed.ncbi.nlm.nih.gov/36430572 https://pubmed.ncbi.nlm.nih.gov/36380235 https://pubmed.ncbi.nlm.nih.gov/36323361 https://pubmed.ncbi.nlm.nih.gov/36225112 https://pubmed.ncbi.nlm.nih.gov/36104591 https://pubmed.ncbi.nlm.nih.gov/35830808 https://pubmed.ncbi.nlm.nih.gov/35808924 https://pubmed.ncbi.nlm.nih.gov/35788155 https://pubmed.ncbi.nlm.nih.gov/35718056 https://pubmed.ncbi.nlm.nih.go…
ENSG00000196569	LAMA2	192.623	-2.29825	4.57105e-10	5.94803e-08	Y	laminin subunit alpha 2	LAMM, MDC1A	laminin subunit alpha-2|laminin M chain|laminin, alpha 2|laminin-12 subunit alpha|laminin-2 subunit alpha|laminin-4 subunit alpha|merosin heavy chain|mutant laminin subunit alpha 2	laminin subunit alpha 2	https://www.ensembl.org/Homo_sapiens/Gene/ExpressionAtlas?g=ENSG00000196569	http://www.ensembl.org/id/ENSG00000196569	https://www.ncbi.nlm.nih.gov/gene?term=(LAMA2[Gene Name]) AND Homo sapiens[Organism]	https://pubmed.ncbi.nlm.nih.gov/36598654 https://pubmed.ncbi.nlm.nih.gov/36518255 https://pubmed.ncbi.nlm.nih.gov/36408280 https://pubmed.ncbi.nlm.nih.gov/36395078 https://pubmed.ncbi.nlm.nih.gov/36373293 https://pubmed.ncbi.nlm.nih.gov/36362280 https://pubmed.ncbi.nlm.nih.gov/36357874 https://pubmed.ncbi.nlm.nih.gov/36334577 https://pubmed.ncbi.nlm.nih.gov/36334352 https://pubmed.ncbi.nlm.nih.go…	https://pubmed.ncbi.nlm.nih.gov/36598654 https://pubmed.ncbi.nlm.nih.gov/36518255 https://pubmed.ncbi.nlm.nih.gov/36408280 https://pubmed.ncbi.nlm.nih.gov/36395078 https://pubmed.ncbi.nlm.nih.gov/36373293 https://pubmed.ncbi.nlm.nih.gov/36362280 https://pubmed.ncbi.nlm.nih.gov/36357874 https://pubmed.ncbi.nlm.nih.gov/36334577 https://pubmed.ncbi.nlm.nih.gov/36334352 https://pubmed.ncbi.nlm.nih.go…	https://pubmed.ncbi.nlm.nih.gov/36659877 https://pubmed.ncbi.nlm.nih.gov/36598654 https://pubmed.ncbi.nlm.nih.gov/36575883 https://pubmed.ncbi.nlm.nih.gov/36535090 https://pubmed.ncbi.nlm.nih.gov/36518255 https://pubmed.ncbi.nlm.nih.gov/36408280 https://pubmed.ncbi.nlm.nih.gov/36395078 https://pubmed.ncbi.nlm.nih.gov/36374152 https://pubmed.ncbi.nlm.nih.gov/36373293 https://pubmed.ncbi.nlm.nih.go…
ENSG00000150471	ADGRL3	78.2477	-9.45221	4.72276e-10	6.09507e-08	Y	adhesion G protein-coupled receptor L3	CIRL3, CL3, LEC3, LPHN3	adhesion G protein-coupled receptor L3|calcium-independent alpha-latrotoxin receptor 3|latrophilin homolog 3 (cow)|latrophilin-3|lectomedin 3	adhesion G protein-coupled receptor L3	https://www.ensembl.org/Homo_sapiens/Gene/ExpressionAtlas?g=ENSG00000150471	http://www.ensembl.org/id/ENSG00000150471	https://www.ncbi.nlm.nih.gov/gene?term=(ADGRL3[Gene Name]) AND Homo sapiens[Organism]	https://pubmed.ncbi.nlm.nih.gov/36244455 https://pubmed.ncbi.nlm.nih.gov/36211978 https://pubmed.ncbi.nlm.nih.gov/36151371 https://pubmed.ncbi.nlm.nih.gov/36082049 https://pubmed.ncbi.nlm.nih.gov/35741042 https://pubmed.ncbi.nlm.nih.gov/35418682 https://pubmed.ncbi.nlm.nih.gov/35413679 https://pubmed.ncbi.nlm.nih.gov/35393556 https://pubmed.ncbi.nlm.nih.gov/35013530 https://pubmed.ncbi.nlm.nih.go…	https://pubmed.ncbi.nlm.nih.gov/36244455 https://pubmed.ncbi.nlm.nih.gov/36211978 https://pubmed.ncbi.nlm.nih.gov/36151371 https://pubmed.ncbi.nlm.nih.gov/36082049 https://pubmed.ncbi.nlm.nih.gov/35741042 https://pubmed.ncbi.nlm.nih.gov/35418682 https://pubmed.ncbi.nlm.nih.gov/35413679 https://pubmed.ncbi.nlm.nih.gov/35393556 https://pubmed.ncbi.nlm.nih.gov/35013530 https://pubmed.ncbi.nlm.nih.go…	https://pubmed.ncbi.nlm.nih.gov/36640473 https://pubmed.ncbi.nlm.nih.gov/36400921 https://pubmed.ncbi.nlm.nih.gov/36309016 https://pubmed.ncbi.nlm.nih.gov/36244455 https://pubmed.ncbi.nlm.nih.gov/36211978 https://pubmed.ncbi.nlm.nih.gov/36151371 https://pubmed.ncbi.nlm.nih.gov/36082049 https://pubmed.ncbi.nlm.nih.gov/36051697 https://pubmed.ncbi.nlm.nih.gov/35741042 https://pubmed.ncbi.nlm.nih.go…
ENSG00000187957	DNER	387.908	2.16628	5.99946e-10	7.67979e-08	Y	delta/notch like EGF repeat containing	UNQ26, bet	delta and Notch-like epidermal growth factor-related receptor|H_NH0150O02.1|WUGSC:H_NH0150O02.1|delta-notch-like EGF repeat-containing transmembrane	delta/notch like EGF repeat containing	https://www.ensembl.org/Homo_sapiens/Gene/ExpressionAtlas?g=ENSG00000187957	http://www.ensembl.org/id/ENSG00000187957	https://www.ncbi.nlm.nih.gov/gene?term=(DNER[Gene Name]) AND Homo sapiens[Organism]	https://pubmed.ncbi.nlm.nih.gov/36255071 https://pubmed.ncbi.nlm.nih.gov/36209073 https://pubmed.ncbi.nlm.nih.gov/36204885 https://pubmed.ncbi.nlm.nih.gov/36094774 https://pubmed.ncbi.nlm.nih.gov/36033826 https://pubmed.ncbi.nlm.nih.gov/36001806 https://pubmed.ncbi.nlm.nih.gov/35940913 https://pubmed.ncbi.nlm.nih.gov/35459277 https://pubmed.ncbi.nlm.nih.gov/35408848 https://pubmed.ncbi.nlm.nih.go…	https://pubmed.ncbi.nlm.nih.gov/36255071 https://pubmed.ncbi.nlm.nih.gov/36209073 https://pubmed.ncbi.nlm.nih.gov/36204885 https://pubmed.ncbi.nlm.nih.gov/36094774 https://pubmed.ncbi.nlm.nih.gov/36033826 https://pubmed.ncbi.nlm.nih.gov/36001806 https://pubmed.ncbi.nlm.nih.gov/35940913 https://pubmed.ncbi.nlm.nih.gov/35459277 https://pubmed.ncbi.nlm.nih.gov/35408848 https://pubmed.ncbi.nlm.nih.go…	https://pubmed.ncbi.nlm.nih.gov/36552446 https://pubmed.ncbi.nlm.nih.gov/36385322 https://pubmed.ncbi.nlm.nih.gov/36255071 https://pubmed.ncbi.nlm.nih.gov/36209073 https://pubmed.ncbi.nlm.nih.gov/36204885 https://pubmed.ncbi.nlm.nih.gov/36094774 https://pubmed.ncbi.nlm.nih.gov/36033826 https://pubmed.ncbi.nlm.nih.gov/36001806 https://pubmed.ncbi.nlm.nih.gov/35983515 https://pubmed.ncbi.nlm.nih.go…
ENSG00000169247	SH3TC2	143.673	-2.90523	6.93446e-10	8.80509e-08	Y	SH3 domain and tetratricopeptide repeats 2	CMT4C, MNMN	SH3 domain and tetratricopeptide repeat-containing protein 2|SH3 domain and tetratricopeptide repeats-containing protein 2	SH3 domain and tetratricopeptide repeats 2	https://www.ensembl.org/Homo_sapiens/Gene/ExpressionAtlas?g=ENSG00000169247	http://www.ensembl.org/id/ENSG00000169247	https://www.ncbi.nlm.nih.gov/gene?term=(SH3TC2[Gene Name]) AND Homo sapiens[Organism]	https://pubmed.ncbi.nlm.nih.gov/35383421 https://pubmed.ncbi.nlm.nih.gov/34750751 https://pubmed.ncbi.nlm.nih.gov/34624274 https://pubmed.ncbi.nlm.nih.gov/34602496 https://pubmed.ncbi.nlm.nih.gov/34255403 https://pubmed.ncbi.nlm.nih.gov/34193129 https://pubmed.ncbi.nlm.nih.gov/34190362 https://pubmed.ncbi.nlm.nih.gov/34169998 https://pubmed.ncbi.nlm.nih.gov/34103343 https://pubmed.ncbi.nlm.nih.go…	https://pubmed.ncbi.nlm.nih.gov/35383421 https://pubmed.ncbi.nlm.nih.gov/34750751 https://pubmed.ncbi.nlm.nih.gov/34624274 https://pubmed.ncbi.nlm.nih.gov/34602496 https://pubmed.ncbi.nlm.nih.gov/34255403 https://pubmed.ncbi.nlm.nih.gov/34193129 https://pubmed.ncbi.nlm.nih.gov/34190362 https://pubmed.ncbi.nlm.nih.gov/34169998 https://pubmed.ncbi.nlm.nih.gov/34103343 https://pubmed.ncbi.nlm.nih.go…	https://pubmed.ncbi.nlm.nih.gov/36568637 https://pubmed.ncbi.nlm.nih.gov/20301532 https://pubmed.ncbi.nlm.nih.gov/35954399 https://pubmed.ncbi.nlm.nih.gov/35936615 https://pubmed.ncbi.nlm.nih.gov/35685361 https://pubmed.ncbi.nlm.nih.gov/35383421 https://pubmed.ncbi.nlm.nih.gov/35207700 https://pubmed.ncbi.nlm.nih.gov/34750751 https://pubmed.ncbi.nlm.nih.gov/34624274 https://pubmed.ncbi.nlm.nih.go…
ENSG00000108984	MAP2K6	158.185	-2.46473	7.16952e-10	9.03073e-08	Y	mitogen-activated protein kinase kinase 6	MAPKK6, MEK6, MKK6, PRKMK6, SAPKK-3, SAPKK3	dual specificity mitogen-activated protein kinase kinase 6|MAPK/ERK kinase 6|MAPKK 6|MEK 6|SAPK kinase 3|protein kinase, mitogen-activated, kinase 6 (MAP kinase kinase 6)|stress-activated protein kinase kinase 3	mitogen-activated protein kinase kinase 6	https://www.ensembl.org/Homo_sapiens/Gene/ExpressionAtlas?g=ENSG00000108984	http://www.ensembl.org/id/ENSG00000108984	https://www.ncbi.nlm.nih.gov/gene?term=(MAP2K6[Gene Name]) AND Homo sapiens[Organism]	https://pubmed.ncbi.nlm.nih.gov/36298734 https://pubmed.ncbi.nlm.nih.gov/36205565 https://pubmed.ncbi.nlm.nih.gov/36052691 https://pubmed.ncbi.nlm.nih.gov/35919504 https://pubmed.ncbi.nlm.nih.gov/35797800 https://pubmed.ncbi.nlm.nih.gov/35790898 https://pubmed.ncbi.nlm.nih.gov/35720278 https://pubmed.ncbi.nlm.nih.gov/35637967 https://pubmed.ncbi.nlm.nih.gov/35569513 https://pubmed.ncbi.nlm.nih.go…	https://pubmed.ncbi.nlm.nih.gov/36298734 https://pubmed.ncbi.nlm.nih.gov/36205565 https://pubmed.ncbi.nlm.nih.gov/36052691 https://pubmed.ncbi.nlm.nih.gov/35919504 https://pubmed.ncbi.nlm.nih.gov/35797800 https://pubmed.ncbi.nlm.nih.gov/35790898 https://pubmed.ncbi.nlm.nih.gov/35720278 https://pubmed.ncbi.nlm.nih.gov/35637967 https://pubmed.ncbi.nlm.nih.gov/35569513 https://pubmed.ncbi.nlm.nih.go…	https://pubmed.ncbi.nlm.nih.gov/36468438 https://pubmed.ncbi.nlm.nih.gov/36298734 https://pubmed.ncbi.nlm.nih.gov/36205565 https://pubmed.ncbi.nlm.nih.gov/36119484 https://pubmed.ncbi.nlm.nih.gov/36052691 https://pubmed.ncbi.nlm.nih.gov/35971771 https://pubmed.ncbi.nlm.nih.gov/35919504 https://pubmed.ncbi.nlm.nih.gov/35875096 https://pubmed.ncbi.nlm.nih.gov/35797800 https://pubmed.ncbi.nlm.nih.go…
ENSG00000000971	CFH	56.8767	-5.96998	8.74204e-10	1.09241e-07	Y	complement factor H	AHUS1, AMBP1, ARMD4, ARMS1, CFHL3, FH, FHL1, HF, HF1, HF2, HUS	complement factor H|H factor 1 (complement)|H factor 2 (complement)|adrenomedullin binding protein|age-related maculopathy susceptibility 1|beta-1-H-globulin|beta-1H|factor H|factor H-like 1	complement factor H	https://www.ensembl.org/Homo_sapiens/Gene/ExpressionAtlas?g=ENSG00000000971	http://www.ensembl.org/id/ENSG00000000971	https://www.ncbi.nlm.nih.gov/gene?term=(CFH[Gene Name]) AND Homo sapiens[Organism]	https://pubmed.ncbi.nlm.nih.gov/36643920 https://pubmed.ncbi.nlm.nih.gov/36624458 https://pubmed.ncbi.nlm.nih.gov/36591301 https://pubmed.ncbi.nlm.nih.gov/36589323 https://pubmed.ncbi.nlm.nih.gov/36564071 https://pubmed.ncbi.nlm.nih.gov/36545706 https://pubmed.ncbi.nlm.nih.gov/36514907 https://pubmed.ncbi.nlm.nih.gov/36508968 https://pubmed.ncbi.nlm.nih.gov/36468409 https://pubmed.ncbi.nlm.nih.go…	https://pubmed.ncbi.nlm.nih.gov/36643920 https://pubmed.ncbi.nlm.nih.gov/36624458 https://pubmed.ncbi.nlm.nih.gov/36591301 https://pubmed.ncbi.nlm.nih.gov/36589323 https://pubmed.ncbi.nlm.nih.gov/36564071 https://pubmed.ncbi.nlm.nih.gov/36545706 https://pubmed.ncbi.nlm.nih.gov/36514907 https://pubmed.ncbi.nlm.nih.gov/36508968 https://pubmed.ncbi.nlm.nih.gov/36468409 https://pubmed.ncbi.nlm.nih.go…	https://pubmed.ncbi.nlm.nih.gov/36680323 https://pubmed.ncbi.nlm.nih.gov/36643920 https://pubmed.ncbi.nlm.nih.gov/36630488 https://pubmed.ncbi.nlm.nih.gov/36626252 https://pubmed.ncbi.nlm.nih.gov/36624458 https://pubmed.ncbi.nlm.nih.gov/36622444 https://pubmed.ncbi.nlm.nih.gov/36606279 https://pubmed.ncbi.nlm.nih.gov/36598552 https://pubmed.ncbi.nlm.nih.gov/36591301 https://pubmed.ncbi.nlm.nih.go…
ENSG00000118777	ABCG2	118.422	2.85733	1.20472e-09	1.47041e-07	Y	ATP binding cassette subfamily G member 2 (Junior blood group)	ABC15, ABCP, BCRP, BCRP1, BMDP, CD338, CDw338, CDw388, EST157481, GOUT1, MRX, MXR, MXR-1, MXR1, UAQTL1	broad substrate specificity ATP-binding cassette transporter ABCG2|ABC transporter|ATP-binding cassette transporter G2|ATP-binding cassette, sub-family G (WHITE), member 2 (Junior blood group)|breast cancer resistance protein|broad substrate specificity ATP-binding cassette transporter ABCG2 isoform 1 (Junior blood group)|mitoxantrone resistance-associated protein|multi drug resistance efflux tra…	ATP binding cassette subfamily G member 2 (Junior blood group)	https://www.ensembl.org/Homo_sapiens/Gene/ExpressionAtlas?g=ENSG00000118777	http://www.ensembl.org/id/ENSG00000118777	https://www.ncbi.nlm.nih.gov/gene?term=(ABCG2[Gene Name]) AND Homo sapiens[Organism]	https://pubmed.ncbi.nlm.nih.gov/36650399 https://pubmed.ncbi.nlm.nih.gov/36639673 https://pubmed.ncbi.nlm.nih.gov/36614168 https://pubmed.ncbi.nlm.nih.gov/36580988 https://pubmed.ncbi.nlm.nih.gov/36578040 https://pubmed.ncbi.nlm.nih.gov/36555598 https://pubmed.ncbi.nlm.nih.gov/36529162 https://pubmed.ncbi.nlm.nih.gov/36526072 https://pubmed.ncbi.nlm.nih.gov/36499695 https://pubmed.ncbi.nlm.nih.go…	https://pubmed.ncbi.nlm.nih.gov/36650399 https://pubmed.ncbi.nlm.nih.gov/36639673 https://pubmed.ncbi.nlm.nih.gov/36614168 https://pubmed.ncbi.nlm.nih.gov/36580988 https://pubmed.ncbi.nlm.nih.gov/36578040 https://pubmed.ncbi.nlm.nih.gov/36555598 https://pubmed.ncbi.nlm.nih.gov/36529162 https://pubmed.ncbi.nlm.nih.gov/36526072 https://pubmed.ncbi.nlm.nih.gov/36499695 https://pubmed.ncbi.nlm.nih.go…	https://pubmed.ncbi.nlm.nih.gov/36678870 https://pubmed.ncbi.nlm.nih.gov/36678288 https://pubmed.ncbi.nlm.nih.gov/36662336 https://pubmed.ncbi.nlm.nih.gov/36661065 https://pubmed.ncbi.nlm.nih.gov/36660193 https://pubmed.ncbi.nlm.nih.gov/36651944 https://pubmed.ncbi.nlm.nih.gov/36651271 https://pubmed.ncbi.nlm.nih.gov/36651226 https://pubmed.ncbi.nlm.nih.gov/36650399 https://pubmed.ncbi.nlm.nih.go…
ENSG00000128165	ADM2	93.2731	2.80419	1.2379e-09	1.49929e-07	Y	adrenomedullin 2	AM2, dJ579N16.4	protein ADM2|intermedin	adrenomedullin 2	https://www.ensembl.org/Homo_sapiens/Gene/ExpressionAtlas?g=ENSG00000128165	http://www.ensembl.org/id/ENSG00000128165	https://www.ncbi.nlm.nih.gov/gene?term=(ADM2[Gene Name]) AND Homo sapiens[Organism]	https://pubmed.ncbi.nlm.nih.gov/36379381 https://pubmed.ncbi.nlm.nih.gov/36362188 https://pubmed.ncbi.nlm.nih.gov/36098211 https://pubmed.ncbi.nlm.nih.gov/35896852 https://pubmed.ncbi.nlm.nih.gov/34784295 https://pubmed.ncbi.nlm.nih.gov/34558598 https://pubmed.ncbi.nlm.nih.gov/34437633 https://pubmed.ncbi.nlm.nih.gov/34434487 https://pubmed.ncbi.nlm.nih.gov/34163006 https://pubmed.ncbi.nlm.nih.go…	https://pubmed.ncbi.nlm.nih.gov/36379381 https://pubmed.ncbi.nlm.nih.gov/36362188 https://pubmed.ncbi.nlm.nih.gov/36098211 https://pubmed.ncbi.nlm.nih.gov/35896852 https://pubmed.ncbi.nlm.nih.gov/34784295 https://pubmed.ncbi.nlm.nih.gov/34558598 https://pubmed.ncbi.nlm.nih.gov/34437633 https://pubmed.ncbi.nlm.nih.gov/34434487 https://pubmed.ncbi.nlm.nih.gov/34163006 https://pubmed.ncbi.nlm.nih.go…	https://pubmed.ncbi.nlm.nih.gov/36499977 https://pubmed.ncbi.nlm.nih.gov/36452323 https://pubmed.ncbi.nlm.nih.gov/36379381 https://pubmed.ncbi.nlm.nih.gov/36363325 https://pubmed.ncbi.nlm.nih.gov/36362188 https://pubmed.ncbi.nlm.nih.gov/36272821 https://pubmed.ncbi.nlm.nih.gov/36144160 https://pubmed.ncbi.nlm.nih.gov/36143713 https://pubmed.ncbi.nlm.nih.gov/36098211 https://pubmed.ncbi.nlm.nih.go…
ENSG00000185340	GAS2L1	277.041	2.0621	1.25731e-09	1.51117e-07	Y	growth arrest specific 2 like 1	GAR22	GAS2-like protein 1|GAS2-related protein on chromosome 22|epididymis secretory sperm binding protein|growth arrest-specific protein 2-like 1	growth arrest specific 2 like 1	https://www.ensembl.org/Homo_sapiens/Gene/ExpressionAtlas?g=ENSG00000185340	http://www.ensembl.org/id/ENSG00000185340	https://www.ncbi.nlm.nih.gov/gene?term=(GAS2L1[Gene Name]) AND Homo sapiens[Organism]	https://pubmed.ncbi.nlm.nih.gov/35398513 https://pubmed.ncbi.nlm.nih.gov/33713047 https://pubmed.ncbi.nlm.nih.gov/33103301 https://pubmed.ncbi.nlm.nih.gov/32289147 https://pubmed.ncbi.nlm.nih.gov/31486213 https://pubmed.ncbi.nlm.nih.gov/30967572 https://pubmed.ncbi.nlm.nih.gov/28017616 https://pubmed.ncbi.nlm.nih.gov/24706950 https://pubmed.ncbi.nlm.nih.gov/20537721 https://pubmed.ncbi.nlm.nih.go…	https://pubmed.ncbi.nlm.nih.gov/35398513 https://pubmed.ncbi.nlm.nih.gov/33713047 https://pubmed.ncbi.nlm.nih.gov/33103301 https://pubmed.ncbi.nlm.nih.gov/32289147 https://pubmed.ncbi.nlm.nih.gov/31486213 https://pubmed.ncbi.nlm.nih.gov/30967572 https://pubmed.ncbi.nlm.nih.gov/28017616 https://pubmed.ncbi.nlm.nih.gov/24706950 https://pubmed.ncbi.nlm.nih.gov/20537721 https://pubmed.ncbi.nlm.nih.go…	https://pubmed.ncbi.nlm.nih.gov/36641377 https://pubmed.ncbi.nlm.nih.gov/35794887 https://pubmed.ncbi.nlm.nih.gov/35398513 https://pubmed.ncbi.nlm.nih.gov/35284844 https://pubmed.ncbi.nlm.nih.gov/34555082 https://pubmed.ncbi.nlm.nih.gov/33962068 https://pubmed.ncbi.nlm.nih.gov/33713047 https://pubmed.ncbi.nlm.nih.gov/33333841 https://pubmed.ncbi.nlm.nih.gov/33103301 https://pubmed.ncbi.nlm.nih.go…
ENSG00000006016	CRLF1	92.0756	-3.68319	1.34874e-09	1.60878e-07	Y	cytokine receptor like factor 1	CISS, CISS1, CLF, CLF-1, NR6, zcytor5	cytokine receptor-like factor 1|class I cytokine receptor|cytokine type 1 receptor CRLP-1|cytokine-like factor 1	cytokine receptor like factor 1	https://www.ensembl.org/Homo_sapiens/Gene/ExpressionAtlas?g=ENSG00000006016	http://www.ensembl.org/id/ENSG00000006016	https://www.ncbi.nlm.nih.gov/gene?term=(CRLF1[Gene Name]) AND Homo sapiens[Organism]	https://pubmed.ncbi.nlm.nih.gov/36167601 https://pubmed.ncbi.nlm.nih.gov/36076102 https://pubmed.ncbi.nlm.nih.gov/35984556 https://pubmed.ncbi.nlm.nih.gov/35868418 https://pubmed.ncbi.nlm.nih.gov/35699517 https://pubmed.ncbi.nlm.nih.gov/35526762 https://pubmed.ncbi.nlm.nih.gov/35279206 https://pubmed.ncbi.nlm.nih.gov/35055176 https://pubmed.ncbi.nlm.nih.gov/34656128 https://pubmed.ncbi.nlm.nih.go…	https://pubmed.ncbi.nlm.nih.gov/36167601 https://pubmed.ncbi.nlm.nih.gov/36076102 https://pubmed.ncbi.nlm.nih.gov/35984556 https://pubmed.ncbi.nlm.nih.gov/35868418 https://pubmed.ncbi.nlm.nih.gov/35699517 https://pubmed.ncbi.nlm.nih.gov/35526762 https://pubmed.ncbi.nlm.nih.gov/35279206 https://pubmed.ncbi.nlm.nih.gov/35055176 https://pubmed.ncbi.nlm.nih.gov/34656128 https://pubmed.ncbi.nlm.nih.go…	https://pubmed.ncbi.nlm.nih.gov/36468151 https://pubmed.ncbi.nlm.nih.gov/36167601 https://pubmed.ncbi.nlm.nih.gov/36076102 https://pubmed.ncbi.nlm.nih.gov/35984556 https://pubmed.ncbi.nlm.nih.gov/35868418 https://pubmed.ncbi.nlm.nih.gov/35699517 https://pubmed.ncbi.nlm.nih.gov/35526762 https://pubmed.ncbi.nlm.nih.gov/35279206 https://pubmed.ncbi.nlm.nih.gov/35055176 https://pubmed.ncbi.nlm.nih.go…
ENSG00000145687	SSBP2	189.88	-2.20392	1.6068e-09	1.90218e-07	Y	single stranded DNA binding protein 2	HSPC116, SOSS-B2	single-stranded DNA-binding protein 2|sequence-specific single-stranded-DNA-binding protein 2	single stranded DNA binding protein 2	https://www.ensembl.org/Homo_sapiens/Gene/ExpressionAtlas?g=ENSG00000145687	http://www.ensembl.org/id/ENSG00000145687	https://www.ncbi.nlm.nih.gov/gene?term=(SSBP2[Gene Name]) AND Homo sapiens[Organism]	https://pubmed.ncbi.nlm.nih.gov/35412941 https://pubmed.ncbi.nlm.nih.gov/34642383 https://pubmed.ncbi.nlm.nih.gov/34074528 https://pubmed.ncbi.nlm.nih.gov/33847962 https://pubmed.ncbi.nlm.nih.gov/33197935 https://pubmed.ncbi.nlm.nih.gov/32745119 https://pubmed.ncbi.nlm.nih.gov/32374750 https://pubmed.ncbi.nlm.nih.gov/31892537 https://pubmed.ncbi.nlm.nih.gov/31882468 https://pubmed.ncbi.nlm.nih.go…	https://pubmed.ncbi.nlm.nih.gov/35412941 https://pubmed.ncbi.nlm.nih.gov/34642383 https://pubmed.ncbi.nlm.nih.gov/34074528 https://pubmed.ncbi.nlm.nih.gov/33847962 https://pubmed.ncbi.nlm.nih.gov/33197935 https://pubmed.ncbi.nlm.nih.gov/32745119 https://pubmed.ncbi.nlm.nih.gov/32374750 https://pubmed.ncbi.nlm.nih.gov/31892537 https://pubmed.ncbi.nlm.nih.gov/31882468 https://pubmed.ncbi.nlm.nih.go…	https://pubmed.ncbi.nlm.nih.gov/36171231 https://pubmed.ncbi.nlm.nih.gov/35412941 https://pubmed.ncbi.nlm.nih.gov/35204577 https://pubmed.ncbi.nlm.nih.gov/34893534 https://pubmed.ncbi.nlm.nih.gov/34642383 https://pubmed.ncbi.nlm.nih.gov/34074528 https://pubmed.ncbi.nlm.nih.gov/33847962 https://pubmed.ncbi.nlm.nih.gov/33339271 https://pubmed.ncbi.nlm.nih.gov/33197935 https://pubmed.ncbi.nlm.nih.go…
ENSG00000265972	TXNIP	161.047	-2.67962	1.71128e-09	2.01076e-07	Y	thioredoxin interacting protein	ARRDC6, EST01027, HHCPA78, THIF, VDUP1	thioredoxin-interacting protein|thioredoxin binding protein 2|upregulated by 1,25-dihydroxyvitamin D-3|vitamin D3 up-regulated protein 1	thioredoxin interacting protein	https://www.ensembl.org/Homo_sapiens/Gene/ExpressionAtlas?g=ENSG00000265972	http://www.ensembl.org/id/ENSG00000265972	https://www.ncbi.nlm.nih.gov/gene?term=(TXNIP[Gene Name]) AND Homo sapiens[Organism]	https://pubmed.ncbi.nlm.nih.gov/36651294 https://pubmed.ncbi.nlm.nih.gov/36639990 https://pubmed.ncbi.nlm.nih.gov/36631012 https://pubmed.ncbi.nlm.nih.gov/36614042 https://pubmed.ncbi.nlm.nih.gov/36604111 https://pubmed.ncbi.nlm.nih.gov/36595680 https://pubmed.ncbi.nlm.nih.gov/36519134 https://pubmed.ncbi.nlm.nih.gov/36517743 https://pubmed.ncbi.nlm.nih.gov/36450326 https://pubmed.ncbi.nlm.nih.go…	https://pubmed.ncbi.nlm.nih.gov/36651294 https://pubmed.ncbi.nlm.nih.gov/36639990 https://pubmed.ncbi.nlm.nih.gov/36631012 https://pubmed.ncbi.nlm.nih.gov/36614042 https://pubmed.ncbi.nlm.nih.gov/36604111 https://pubmed.ncbi.nlm.nih.gov/36595680 https://pubmed.ncbi.nlm.nih.gov/36519134 https://pubmed.ncbi.nlm.nih.gov/36517743 https://pubmed.ncbi.nlm.nih.gov/36450326 https://pubmed.ncbi.nlm.nih.go…	https://pubmed.ncbi.nlm.nih.gov/36671008 https://pubmed.ncbi.nlm.nih.gov/36670235 https://pubmed.ncbi.nlm.nih.gov/36661507 https://pubmed.ncbi.nlm.nih.gov/36651333 https://pubmed.ncbi.nlm.nih.gov/36651294 https://pubmed.ncbi.nlm.nih.gov/36642539 https://pubmed.ncbi.nlm.nih.gov/36640710 https://pubmed.ncbi.nlm.nih.gov/36639999 https://pubmed.ncbi.nlm.nih.gov/36639990 https://pubmed.ncbi.nlm.nih.go…
ENSG00000163235	TGFA	108.663	-2.67418	1.90916e-09	2.21028e-07	Y	transforming growth factor alpha	TFGA	protransforming growth factor alpha|TGF-alpha	transforming growth factor alpha	https://www.ensembl.org/Homo_sapiens/Gene/ExpressionAtlas?g=ENSG00000163235	http://www.ensembl.org/id/ENSG00000163235	https://www.ncbi.nlm.nih.gov/gene?term=(TGFA[Gene Name]) AND Homo sapiens[Organism]	https://pubmed.ncbi.nlm.nih.gov/36430763 https://pubmed.ncbi.nlm.nih.gov/36430309 https://pubmed.ncbi.nlm.nih.gov/36378335 https://pubmed.ncbi.nlm.nih.gov/36089590 https://pubmed.ncbi.nlm.nih.gov/35973929 https://pubmed.ncbi.nlm.nih.gov/35963622 https://pubmed.ncbi.nlm.nih.gov/35860855 https://pubmed.ncbi.nlm.nih.gov/35804263 https://pubmed.ncbi.nlm.nih.gov/35686121 https://pubmed.ncbi.nlm.nih.go…	https://pubmed.ncbi.nlm.nih.gov/36430763 https://pubmed.ncbi.nlm.nih.gov/36430309 https://pubmed.ncbi.nlm.nih.gov/36378335 https://pubmed.ncbi.nlm.nih.gov/36089590 https://pubmed.ncbi.nlm.nih.gov/35973929 https://pubmed.ncbi.nlm.nih.gov/35963622 https://pubmed.ncbi.nlm.nih.gov/35860855 https://pubmed.ncbi.nlm.nih.gov/35804263 https://pubmed.ncbi.nlm.nih.gov/35686121 https://pubmed.ncbi.nlm.nih.go…	https://pubmed.ncbi.nlm.nih.gov/36474468 https://pubmed.ncbi.nlm.nih.gov/36430763 https://pubmed.ncbi.nlm.nih.gov/36430309 https://pubmed.ncbi.nlm.nih.gov/36378335 https://pubmed.ncbi.nlm.nih.gov/36285617 https://pubmed.ncbi.nlm.nih.gov/36089590 https://pubmed.ncbi.nlm.nih.gov/36012250 https://pubmed.ncbi.nlm.nih.gov/35973929 https://pubmed.ncbi.nlm.nih.gov/35963622 https://pubmed.ncbi.nlm.nih.go…
ENSG00000175899	A2M	124.063	-8.67108	1.9743e-09	2.269e-07	Y	alpha-2-macroglobulin	A2MD, CPAMD5, FWP007, S863-7	alpha-2-macroglobulin|C3 and PZP-like alpha-2-macroglobulin domain-containing protein 5|alpha-2-M	alpha-2-macroglobulin	https://www.ensembl.org/Homo_sapiens/Gene/ExpressionAtlas?g=ENSG00000175899	http://www.ensembl.org/id/ENSG00000175899	https://www.ncbi.nlm.nih.gov/gene?term=(A2M[Gene Name]) AND Homo sapiens[Organism]	https://pubmed.ncbi.nlm.nih.gov/36533828 https://pubmed.ncbi.nlm.nih.gov/36461613 https://pubmed.ncbi.nlm.nih.gov/36244309 https://pubmed.ncbi.nlm.nih.gov/36230937 https://pubmed.ncbi.nlm.nih.gov/36229929 https://pubmed.ncbi.nlm.nih.gov/36214709 https://pubmed.ncbi.nlm.nih.gov/36141729 https://pubmed.ncbi.nlm.nih.gov/36119042 https://pubmed.ncbi.nlm.nih.gov/36087898 https://pubmed.ncbi.nlm.nih.go…	https://pubmed.ncbi.nlm.nih.gov/36533828 https://pubmed.ncbi.nlm.nih.gov/36461613 https://pubmed.ncbi.nlm.nih.gov/36244309 https://pubmed.ncbi.nlm.nih.gov/36230937 https://pubmed.ncbi.nlm.nih.gov/36229929 https://pubmed.ncbi.nlm.nih.gov/36214709 https://pubmed.ncbi.nlm.nih.gov/36141729 https://pubmed.ncbi.nlm.nih.gov/36119042 https://pubmed.ncbi.nlm.nih.gov/36087898 https://pubmed.ncbi.nlm.nih.go…	https://pubmed.ncbi.nlm.nih.gov/36653353 https://pubmed.ncbi.nlm.nih.gov/36606868 https://pubmed.ncbi.nlm.nih.gov/36582735 https://pubmed.ncbi.nlm.nih.gov/36575389 https://pubmed.ncbi.nlm.nih.gov/36533828 https://pubmed.ncbi.nlm.nih.gov/36516225 https://pubmed.ncbi.nlm.nih.gov/36478554 https://pubmed.ncbi.nlm.nih.gov/36461613 https://pubmed.ncbi.nlm.nih.gov/36440749 https://pubmed.ncbi.nlm.nih.go…
ENSG00000107736	CDH23	50.928	-5.33748	2.07582e-09	2.36839e-07	Y	cadherin related 23	CDHR23, PITA5, USH1D	cadherin-23|cadherin-like 23|cadherin-related family member 23|otocadherin	cadherin related 23	https://www.ensembl.org/Homo_sapiens/Gene/ExpressionAtlas?g=ENSG00000107736	http://www.ensembl.org/id/ENSG00000107736	https://www.ncbi.nlm.nih.gov/gene?term=(CDH23[Gene Name]) AND Homo sapiens[Organism]	https://pubmed.ncbi.nlm.nih.gov/36597107 https://pubmed.ncbi.nlm.nih.gov/36474139 https://pubmed.ncbi.nlm.nih.gov/36468022 https://pubmed.ncbi.nlm.nih.gov/36359740 https://pubmed.ncbi.nlm.nih.gov/36141853 https://pubmed.ncbi.nlm.nih.gov/36011334 https://pubmed.ncbi.nlm.nih.gov/35786118 https://pubmed.ncbi.nlm.nih.gov/35597916 https://pubmed.ncbi.nlm.nih.gov/35596833 https://pubmed.ncbi.nlm.nih.go…	https://pubmed.ncbi.nlm.nih.gov/36597107 https://pubmed.ncbi.nlm.nih.gov/36474139 https://pubmed.ncbi.nlm.nih.gov/36468022 https://pubmed.ncbi.nlm.nih.gov/36359740 https://pubmed.ncbi.nlm.nih.gov/36141853 https://pubmed.ncbi.nlm.nih.gov/36011334 https://pubmed.ncbi.nlm.nih.gov/35786118 https://pubmed.ncbi.nlm.nih.gov/35597916 https://pubmed.ncbi.nlm.nih.gov/35596833 https://pubmed.ncbi.nlm.nih.go…	https://pubmed.ncbi.nlm.nih.gov/36597107 https://pubmed.ncbi.nlm.nih.gov/36565421 https://pubmed.ncbi.nlm.nih.gov/36504663 https://pubmed.ncbi.nlm.nih.gov/36474139 https://pubmed.ncbi.nlm.nih.gov/36468022 https://pubmed.ncbi.nlm.nih.gov/36359740 https://pubmed.ncbi.nlm.nih.gov/36308003 https://pubmed.ncbi.nlm.nih.gov/36262047 https://pubmed.ncbi.nlm.nih.gov/36141853 https://pubmed.ncbi.nlm.nih.go…
ENSG00000146376	ARHGAP18	1272.95	-2.23884	2.15138e-09	2.4281e-07	Y	Rho GTPase activating protein 18	MacGAP, SENEX, bA307O14.2	rho GTPase-activating protein 18|rho-type GTPase-activating protein 18	Rho GTPase activating protein 18	https://www.ensembl.org/Homo_sapiens/Gene/ExpressionAtlas?g=ENSG00000146376	http://www.ensembl.org/id/ENSG00000146376	https://www.ncbi.nlm.nih.gov/gene?term=(ARHGAP18[Gene Name]) AND Homo sapiens[Organism]	https://pubmed.ncbi.nlm.nih.gov/34262023 https://pubmed.ncbi.nlm.nih.gov/33973626 https://pubmed.ncbi.nlm.nih.gov/33316381 https://pubmed.ncbi.nlm.nih.gov/33092266 https://pubmed.ncbi.nlm.nih.gov/32082315 https://pubmed.ncbi.nlm.nih.gov/32016689 https://pubmed.ncbi.nlm.nih.gov/32013974 https://pubmed.ncbi.nlm.nih.gov/31776727 https://pubmed.ncbi.nlm.nih.gov/31327185 https://pubmed.ncbi.nlm.nih.go…	https://pubmed.ncbi.nlm.nih.gov/34262023 https://pubmed.ncbi.nlm.nih.gov/33973626 https://pubmed.ncbi.nlm.nih.gov/33316381 https://pubmed.ncbi.nlm.nih.gov/33092266 https://pubmed.ncbi.nlm.nih.gov/32082315 https://pubmed.ncbi.nlm.nih.gov/32016689 https://pubmed.ncbi.nlm.nih.gov/32013974 https://pubmed.ncbi.nlm.nih.gov/31776727 https://pubmed.ncbi.nlm.nih.gov/31327185 https://pubmed.ncbi.nlm.nih.go…	https://pubmed.ncbi.nlm.nih.gov/36443886 https://pubmed.ncbi.nlm.nih.gov/34990617 https://pubmed.ncbi.nlm.nih.gov/34768920 https://pubmed.ncbi.nlm.nih.gov/34262023 https://pubmed.ncbi.nlm.nih.gov/33973626 https://pubmed.ncbi.nlm.nih.gov/33613306 https://pubmed.ncbi.nlm.nih.gov/33316381 https://pubmed.ncbi.nlm.nih.gov/33092266 https://pubmed.ncbi.nlm.nih.gov/32765790 https://pubmed.ncbi.nlm.nih.go…
ENSG00000114200	BCHE	134.621	-2.52222	2.159e-09	2.4281e-07	Y	butyrylcholinesterase	BCHED, CHE1, CHE2, E1	cholinesterase|acylcholine acylhydrolase|butyrylcholine esterase|choline esterase II|cholinesterase (serum) 2|cholinesterase 1|pseudocholinesterase	butyrylcholinesterase	https://www.ensembl.org/Homo_sapiens/Gene/ExpressionAtlas?g=ENSG00000114200	http://www.ensembl.org/id/ENSG00000114200	https://www.ncbi.nlm.nih.gov/gene?term=(BCHE[Gene Name]) AND Homo sapiens[Organism]	https://pubmed.ncbi.nlm.nih.gov/36638134 https://pubmed.ncbi.nlm.nih.gov/36635365 https://pubmed.ncbi.nlm.nih.gov/36565675 https://pubmed.ncbi.nlm.nih.gov/36542960 https://pubmed.ncbi.nlm.nih.gov/36500605 https://pubmed.ncbi.nlm.nih.gov/36474266 https://pubmed.ncbi.nlm.nih.gov/36436686 https://pubmed.ncbi.nlm.nih.gov/36401242 https://pubmed.ncbi.nlm.nih.gov/36362178 https://pubmed.ncbi.nlm.nih.go…	https://pubmed.ncbi.nlm.nih.gov/36638134 https://pubmed.ncbi.nlm.nih.gov/36635365 https://pubmed.ncbi.nlm.nih.gov/36565675 https://pubmed.ncbi.nlm.nih.gov/36542960 https://pubmed.ncbi.nlm.nih.gov/36500605 https://pubmed.ncbi.nlm.nih.gov/36474266 https://pubmed.ncbi.nlm.nih.gov/36436686 https://pubmed.ncbi.nlm.nih.gov/36401242 https://pubmed.ncbi.nlm.nih.gov/36362178 https://pubmed.ncbi.nlm.nih.go…	https://pubmed.ncbi.nlm.nih.gov/36679057 https://pubmed.ncbi.nlm.nih.gov/36678985 https://pubmed.ncbi.nlm.nih.gov/36678580 https://pubmed.ncbi.nlm.nih.gov/36678552 https://pubmed.ncbi.nlm.nih.gov/36677655 https://pubmed.ncbi.nlm.nih.gov/36648628 https://pubmed.ncbi.nlm.nih.gov/36638595 https://pubmed.ncbi.nlm.nih.gov/36638134 https://pubmed.ncbi.nlm.nih.gov/36637391 https://pubmed.ncbi.nlm.nih.go…
ENSG00000166833	NAV2	213.702	-2.28994	2.20264e-09	2.45961e-07	Y	neuron navigator 2	HELAD1, POMFIL2, RAINB1, STEERIN2, UNC53H2	neuron navigator 2|helicase, APC down-regulated 1|pore membrane and/or filament-interacting-like protein 2|retinoic acid inducible gene in neuroblastoma 1|steerin-2|unc-53 homolog 2	neuron navigator 2	https://www.ensembl.org/Homo_sapiens/Gene/ExpressionAtlas?g=ENSG00000166833	http://www.ensembl.org/id/ENSG00000166833	https://www.ncbi.nlm.nih.gov/gene?term=(NAV2[Gene Name]) AND Homo sapiens[Organism]	https://pubmed.ncbi.nlm.nih.gov/36406589 https://pubmed.ncbi.nlm.nih.gov/36200505 https://pubmed.ncbi.nlm.nih.gov/35798713 https://pubmed.ncbi.nlm.nih.gov/34816580 https://pubmed.ncbi.nlm.nih.gov/34336000 https://pubmed.ncbi.nlm.nih.gov/34100980 https://pubmed.ncbi.nlm.nih.gov/33931978 https://pubmed.ncbi.nlm.nih.gov/33689574 https://pubmed.ncbi.nlm.nih.gov/33522999 https://pubmed.ncbi.nlm.nih.go…	https://pubmed.ncbi.nlm.nih.gov/36406589 https://pubmed.ncbi.nlm.nih.gov/36200505 https://pubmed.ncbi.nlm.nih.gov/35798713 https://pubmed.ncbi.nlm.nih.gov/34816580 https://pubmed.ncbi.nlm.nih.gov/34336000 https://pubmed.ncbi.nlm.nih.gov/34100980 https://pubmed.ncbi.nlm.nih.gov/33931978 https://pubmed.ncbi.nlm.nih.gov/33689574 https://pubmed.ncbi.nlm.nih.gov/33522999 https://pubmed.ncbi.nlm.nih.go…	https://pubmed.ncbi.nlm.nih.gov/36503346 https://pubmed.ncbi.nlm.nih.gov/36450758 https://pubmed.ncbi.nlm.nih.gov/36406589 https://pubmed.ncbi.nlm.nih.gov/36200505 https://pubmed.ncbi.nlm.nih.gov/35798713 https://pubmed.ncbi.nlm.nih.gov/35647297 https://pubmed.ncbi.nlm.nih.gov/35218524 https://pubmed.ncbi.nlm.nih.gov/35174991 https://pubmed.ncbi.nlm.nih.gov/35039994 https://pubmed.ncbi.nlm.nih.go…
ENSG00000171951	SCG2	69.9288	-5.52111	2.79597e-09	3.05712e-07	Y	menin 1	MEAI, SCG2	menin	menin 1	https://www.ensembl.org/Homo_sapiens/Gene/ExpressionAtlas?g=ENSG00000171951	http://www.ensembl.org/id/ENSG00000171951	https://www.ncbi.nlm.nih.gov/gene?term=(SCG2[Gene Name]) AND Homo sapiens[Organism]	https://pubmed.ncbi.nlm.nih.gov/36199424 https://pubmed.ncbi.nlm.nih.gov/36057262 https://pubmed.ncbi.nlm.nih.gov/36011263 https://pubmed.ncbi.nlm.nih.gov/35941638 https://pubmed.ncbi.nlm.nih.gov/35844556 https://pubmed.ncbi.nlm.nih.gov/35793235 https://pubmed.ncbi.nlm.nih.gov/35437508 https://pubmed.ncbi.nlm.nih.gov/35341274 https://pubmed.ncbi.nlm.nih.gov/34815513 https://pubmed.ncbi.nlm.nih.go…	https://pubmed.ncbi.nlm.nih.gov/36199424 https://pubmed.ncbi.nlm.nih.gov/36057262 https://pubmed.ncbi.nlm.nih.gov/36011263 https://pubmed.ncbi.nlm.nih.gov/35941638 https://pubmed.ncbi.nlm.nih.gov/35844556 https://pubmed.ncbi.nlm.nih.gov/35793235 https://pubmed.ncbi.nlm.nih.gov/35437508 https://pubmed.ncbi.nlm.nih.gov/35341274 https://pubmed.ncbi.nlm.nih.gov/34815513 https://pubmed.ncbi.nlm.nih.go…	https://pubmed.ncbi.nlm.nih.gov/36589450 https://pubmed.ncbi.nlm.nih.gov/36553445 https://pubmed.ncbi.nlm.nih.gov/36199424 https://pubmed.ncbi.nlm.nih.gov/36057262 https://pubmed.ncbi.nlm.nih.gov/36011263 https://pubmed.ncbi.nlm.nih.gov/35941638 https://pubmed.ncbi.nlm.nih.gov/35844556 https://pubmed.ncbi.nlm.nih.gov/35836930 https://pubmed.ncbi.nlm.nih.gov/35793235 https://pubmed.ncbi.nlm.nih.go…
ENSG00000116678	LEPR	206.429	-2.31045	3.08847e-09	3.33068e-07	Y	leptin receptor	CD295, LEP-R, LEPRD, OB-R, OBR	leptin receptor|OB receptor|huB219	leptin receptor	https://www.ensembl.org/Homo_sapiens/Gene/ExpressionAtlas?g=ENSG00000116678	http://www.ensembl.org/id/ENSG00000116678	https://www.ncbi.nlm.nih.gov/gene?term=(LEPR[Gene Name]) AND Homo sapiens[Organism]	https://pubmed.ncbi.nlm.nih.gov/36631028 https://pubmed.ncbi.nlm.nih.gov/36539110 https://pubmed.ncbi.nlm.nih.gov/36360268 https://pubmed.ncbi.nlm.nih.gov/36291602 https://pubmed.ncbi.nlm.nih.gov/36277707 https://pubmed.ncbi.nlm.nih.gov/36272401 https://pubmed.ncbi.nlm.nih.gov/36253742 https://pubmed.ncbi.nlm.nih.gov/36241774 https://pubmed.ncbi.nlm.nih.gov/36232301 https://pubmed.ncbi.nlm.nih.go…	https://pubmed.ncbi.nlm.nih.gov/36631028 https://pubmed.ncbi.nlm.nih.gov/36539110 https://pubmed.ncbi.nlm.nih.gov/36360268 https://pubmed.ncbi.nlm.nih.gov/36291602 https://pubmed.ncbi.nlm.nih.gov/36277707 https://pubmed.ncbi.nlm.nih.gov/36272401 https://pubmed.ncbi.nlm.nih.gov/36253742 https://pubmed.ncbi.nlm.nih.gov/36241774 https://pubmed.ncbi.nlm.nih.gov/36232301 https://pubmed.ncbi.nlm.nih.go…	https://pubmed.ncbi.nlm.nih.gov/36672908 https://pubmed.ncbi.nlm.nih.gov/36650381 https://pubmed.ncbi.nlm.nih.gov/36650272 https://pubmed.ncbi.nlm.nih.gov/36648363 https://pubmed.ncbi.nlm.nih.gov/36631028 https://pubmed.ncbi.nlm.nih.gov/36625462 https://pubmed.ncbi.nlm.nih.gov/36607794 https://pubmed.ncbi.nlm.nih.gov/36602128 https://pubmed.ncbi.nlm.nih.gov/36589459 https://pubmed.ncbi.nlm.nih.go…
ENSG00000148053	NTRK2	57.9756	-5.2443	3.28019e-09	3.48963e-07	Y	neurotrophic receptor tyrosine kinase 2	DEE58, EIEE58, GP145-TrkB, OBHD, TRKB, trk-B	BDNF/NT-3 growth factors receptor|BDNF-tropomyosine receptor kinase B|neurotrophic tyrosine kinase receptor type 2|tropomyosin-related kinase B|tyrosine kinase receptor B	neurotrophic receptor tyrosine kinase 2	https://www.ensembl.org/Homo_sapiens/Gene/ExpressionAtlas?g=ENSG00000148053	http://www.ensembl.org/id/ENSG00000148053	https://www.ncbi.nlm.nih.gov/gene?term=(NTRK2[Gene Name]) AND Homo sapiens[Organism]	https://pubmed.ncbi.nlm.nih.gov/36499693 https://pubmed.ncbi.nlm.nih.gov/36395454 https://pubmed.ncbi.nlm.nih.gov/36352380 https://pubmed.ncbi.nlm.nih.gov/36271929 https://pubmed.ncbi.nlm.nih.gov/36266274 https://pubmed.ncbi.nlm.nih.gov/36265224 https://pubmed.ncbi.nlm.nih.gov/36256645 https://pubmed.ncbi.nlm.nih.gov/36232301 https://pubmed.ncbi.nlm.nih.gov/36223009 https://pubmed.ncbi.nlm.nih.go…	https://pubmed.ncbi.nlm.nih.gov/36499693 https://pubmed.ncbi.nlm.nih.gov/36395454 https://pubmed.ncbi.nlm.nih.gov/36352380 https://pubmed.ncbi.nlm.nih.gov/36271929 https://pubmed.ncbi.nlm.nih.gov/36266274 https://pubmed.ncbi.nlm.nih.gov/36265224 https://pubmed.ncbi.nlm.nih.gov/36256645 https://pubmed.ncbi.nlm.nih.gov/36232301 https://pubmed.ncbi.nlm.nih.gov/36223009 https://pubmed.ncbi.nlm.nih.go…	https://pubmed.ncbi.nlm.nih.gov/36655517 https://pubmed.ncbi.nlm.nih.gov/36641106 https://pubmed.ncbi.nlm.nih.gov/36586421 https://pubmed.ncbi.nlm.nih.gov/36536899 https://pubmed.ncbi.nlm.nih.gov/36533776 https://pubmed.ncbi.nlm.nih.gov/36531047 https://pubmed.ncbi.nlm.nih.gov/36505306 https://pubmed.ncbi.nlm.nih.gov/36503215 https://pubmed.ncbi.nlm.nih.gov/36499693 https://pubmed.ncbi.nlm.nih.go…
ENSG00000185477	GPRIN3	169.016	-2.44159	3.39324e-09	3.58567e-07	Y	GPRIN family member 3	GRIN3	G protein-regulated inducer of neurite outgrowth 3	GPRIN family member 3	https://www.ensembl.org/Homo_sapiens/Gene/ExpressionAtlas?g=ENSG00000185477	http://www.ensembl.org/id/ENSG00000185477	https://www.ncbi.nlm.nih.gov/gene?term=(GPRIN3[Gene Name]) AND Homo sapiens[Organism]	https://pubmed.ncbi.nlm.nih.gov/33254176 https://pubmed.ncbi.nlm.nih.gov/29500670	https://pubmed.ncbi.nlm.nih.gov/33254176 https://pubmed.ncbi.nlm.nih.gov/29500670	https://pubmed.ncbi.nlm.nih.gov/36523322 https://pubmed.ncbi.nlm.nih.gov/33810234 https://pubmed.ncbi.nlm.nih.gov/33254176 https://pubmed.ncbi.nlm.nih.gov/32774342 https://pubmed.ncbi.nlm.nih.gov/31363062 https://pubmed.ncbi.nlm.nih.gov/29500670 https://pubmed.ncbi.nlm.nih.gov/27834918
ENSG00000166922	SCG5	64.0933	3.55905	3.75472e-09	3.9412e-07	Y	secretogranin V	7B2, P7B2, SGNE1, SgV	neuroendocrine protein 7B2|pituitary polypeptide|prohormone convertase chaperone|secretogranin-5|secretory granule endocrine protein I|secretory granule, neuroendocrine protein 1 (7B2 protein)	secretogranin V	https://www.ensembl.org/Homo_sapiens/Gene/ExpressionAtlas?g=ENSG00000166922	http://www.ensembl.org/id/ENSG00000166922	https://www.ncbi.nlm.nih.gov/gene?term=(SCG5[Gene Name]) AND Homo sapiens[Organism]	https://pubmed.ncbi.nlm.nih.gov/36059698 https://pubmed.ncbi.nlm.nih.gov/35947350 https://pubmed.ncbi.nlm.nih.gov/35361846 https://pubmed.ncbi.nlm.nih.gov/34791022 https://pubmed.ncbi.nlm.nih.gov/33976257 https://pubmed.ncbi.nlm.nih.gov/33892811 https://pubmed.ncbi.nlm.nih.gov/33330307 https://pubmed.ncbi.nlm.nih.gov/33164330 https://pubmed.ncbi.nlm.nih.gov/32928873 https://pubmed.ncbi.nlm.nih.go…	https://pubmed.ncbi.nlm.nih.gov/36059698 https://pubmed.ncbi.nlm.nih.gov/35947350 https://pubmed.ncbi.nlm.nih.gov/35361846 https://pubmed.ncbi.nlm.nih.gov/34791022 https://pubmed.ncbi.nlm.nih.gov/33976257 https://pubmed.ncbi.nlm.nih.gov/33892811 https://pubmed.ncbi.nlm.nih.gov/33330307 https://pubmed.ncbi.nlm.nih.gov/33164330 https://pubmed.ncbi.nlm.nih.gov/32928873 https://pubmed.ncbi.nlm.nih.go…	https://pubmed.ncbi.nlm.nih.gov/36507532 https://pubmed.ncbi.nlm.nih.gov/36344976 https://pubmed.ncbi.nlm.nih.gov/36245971 https://pubmed.ncbi.nlm.nih.gov/36059698 https://pubmed.ncbi.nlm.nih.gov/35947350 https://pubmed.ncbi.nlm.nih.gov/35361846 https://pubmed.ncbi.nlm.nih.gov/34791022 https://pubmed.ncbi.nlm.nih.gov/34774734 https://pubmed.ncbi.nlm.nih.gov/34769107 https://pubmed.ncbi.nlm.nih.go…
ENSG00000088756	ARHGAP28	120.653	-3.13852	3.88327e-09	4.04915e-07	Y	Rho GTPase activating protein 28		rho GTPase-activating protein 28|rho-type GTPase-activating protein 28	Rho GTPase activating protein 28	https://www.ensembl.org/Homo_sapiens/Gene/ExpressionAtlas?g=ENSG00000088756	http://www.ensembl.org/id/ENSG00000088756	https://www.ncbi.nlm.nih.gov/gene?term=(ARHGAP28[Gene Name]) AND Homo sapiens[Organism]	https://pubmed.ncbi.nlm.nih.gov/34478856 https://pubmed.ncbi.nlm.nih.gov/33768542 https://pubmed.ncbi.nlm.nih.gov/32391922 https://pubmed.ncbi.nlm.nih.gov/31083655 https://pubmed.ncbi.nlm.nih.gov/30697902 https://pubmed.ncbi.nlm.nih.gov/30694715 https://pubmed.ncbi.nlm.nih.gov/26814133 https://pubmed.ncbi.nlm.nih.gov/25211221 https://pubmed.ncbi.nlm.nih.gov/24832863 https://pubmed.ncbi.nlm.nih.go…	https://pubmed.ncbi.nlm.nih.gov/34478856 https://pubmed.ncbi.nlm.nih.gov/33768542 https://pubmed.ncbi.nlm.nih.gov/32391922 https://pubmed.ncbi.nlm.nih.gov/31083655 https://pubmed.ncbi.nlm.nih.gov/30697902 https://pubmed.ncbi.nlm.nih.gov/30694715 https://pubmed.ncbi.nlm.nih.gov/26814133 https://pubmed.ncbi.nlm.nih.gov/25211221 https://pubmed.ncbi.nlm.nih.gov/24832863 https://pubmed.ncbi.nlm.nih.go…	https://pubmed.ncbi.nlm.nih.gov/35708299 https://pubmed.ncbi.nlm.nih.gov/34478856 https://pubmed.ncbi.nlm.nih.gov/33802939 https://pubmed.ncbi.nlm.nih.gov/33768542 https://pubmed.ncbi.nlm.nih.gov/33041663 https://pubmed.ncbi.nlm.nih.gov/32852660 https://pubmed.ncbi.nlm.nih.gov/32391922 https://pubmed.ncbi.nlm.nih.gov/31083655 https://pubmed.ncbi.nlm.nih.gov/30697902 https://pubmed.ncbi.nlm.nih.go…
ENSG00000134242	PTPN22	89.4949	2.79479	4.18706e-09	4.33718e-07	Y	protein tyrosine phosphatase non-receptor type 22	LYP, LYP1, LYP2, PEP, PTPN22.5, PTPN22.6, PTPN8	tyrosine-protein phosphatase non-receptor type 22|PEST-domain phosphatase|hematopoietic cell protein-tyrosine phosphatase 70Z-PEP|lymphoid-specific protein tyrosine phosphatase|protein tyrosine phosphatase, non-receptor type 22 (lymphoid)|protein tyrosine phosphatase, non-receptor type 8	protein tyrosine phosphatase non-receptor type 22	https://www.ensembl.org/Homo_sapiens/Gene/ExpressionAtlas?g=ENSG00000134242	http://www.ensembl.org/id/ENSG00000134242	https://www.ncbi.nlm.nih.gov/gene?term=(PTPN22[Gene Name]) AND Homo sapiens[Organism]	https://pubmed.ncbi.nlm.nih.gov/36306511 https://pubmed.ncbi.nlm.nih.gov/36150053 https://pubmed.ncbi.nlm.nih.gov/36048474 https://pubmed.ncbi.nlm.nih.gov/36034444 https://pubmed.ncbi.nlm.nih.gov/36013501 https://pubmed.ncbi.nlm.nih.gov/35979360 https://pubmed.ncbi.nlm.nih.gov/35958821 https://pubmed.ncbi.nlm.nih.gov/35940545 https://pubmed.ncbi.nlm.nih.gov/35933036 https://pubmed.ncbi.nlm.nih.go…	https://pubmed.ncbi.nlm.nih.gov/36306511 https://pubmed.ncbi.nlm.nih.gov/36150053 https://pubmed.ncbi.nlm.nih.gov/36048474 https://pubmed.ncbi.nlm.nih.gov/36034444 https://pubmed.ncbi.nlm.nih.gov/36013501 https://pubmed.ncbi.nlm.nih.gov/35979360 https://pubmed.ncbi.nlm.nih.gov/35958821 https://pubmed.ncbi.nlm.nih.gov/35940545 https://pubmed.ncbi.nlm.nih.gov/35933036 https://pubmed.ncbi.nlm.nih.go…	https://pubmed.ncbi.nlm.nih.gov/36671813 https://pubmed.ncbi.nlm.nih.gov/36622793 https://pubmed.ncbi.nlm.nih.gov/36605568 https://pubmed.ncbi.nlm.nih.gov/36588574 https://pubmed.ncbi.nlm.nih.gov/36574072 https://pubmed.ncbi.nlm.nih.gov/36556168 https://pubmed.ncbi.nlm.nih.gov/36527873 https://pubmed.ncbi.nlm.nih.gov/36496055 https://pubmed.ncbi.nlm.nih.gov/36445332 https://pubmed.ncbi.nlm.nih.go…
ENSG00000175274	TP53I11	113.083	-2.904	4.82551e-09	4.93361e-07	Y	tumor protein p53 inducible protein 11	PIG11	tumor protein p53-inducible protein 11|p53-induced gene 11 protein	tumor protein p53 inducible protein 11	https://www.ensembl.org/Homo_sapiens/Gene/ExpressionAtlas?g=ENSG00000175274	http://www.ensembl.org/id/ENSG00000175274	https://www.ncbi.nlm.nih.gov/gene?term=(TP53I11[Gene Name]) AND Homo sapiens[Organism]	https://pubmed.ncbi.nlm.nih.gov/36190397 https://pubmed.ncbi.nlm.nih.gov/32572880 https://pubmed.ncbi.nlm.nih.gov/30940320 https://pubmed.ncbi.nlm.nih.gov/30376610 https://pubmed.ncbi.nlm.nih.gov/30241046 https://pubmed.ncbi.nlm.nih.gov/23684732 https://pubmed.ncbi.nlm.nih.gov/22962263 https://pubmed.ncbi.nlm.nih.gov/22547548 https://pubmed.ncbi.nlm.nih.gov/22528125 https://pubmed.ncbi.nlm.nih.go…	https://pubmed.ncbi.nlm.nih.gov/36190397 https://pubmed.ncbi.nlm.nih.gov/32572880 https://pubmed.ncbi.nlm.nih.gov/30940320 https://pubmed.ncbi.nlm.nih.gov/30376610 https://pubmed.ncbi.nlm.nih.gov/30241046 https://pubmed.ncbi.nlm.nih.gov/23684732 https://pubmed.ncbi.nlm.nih.gov/22962263 https://pubmed.ncbi.nlm.nih.gov/22547548 https://pubmed.ncbi.nlm.nih.gov/22528125 https://pubmed.ncbi.nlm.nih.go…	https://pubmed.ncbi.nlm.nih.gov/36190397 https://pubmed.ncbi.nlm.nih.gov/34916903 https://pubmed.ncbi.nlm.nih.gov/34193146 https://pubmed.ncbi.nlm.nih.gov/32572880 https://pubmed.ncbi.nlm.nih.gov/30940320 https://pubmed.ncbi.nlm.nih.gov/30376610 https://pubmed.ncbi.nlm.nih.gov/30241046 https://pubmed.ncbi.nlm.nih.gov/23684732 https://pubmed.ncbi.nlm.nih.gov/22962263 https://pubmed.ncbi.nlm.nih.go…
ENSG00000047346	FAM214A	463.003	-2.16355	5.03532e-09	5.08212e-07	Y	atos homolog A	FAM214A, KIAA1370	atos homolog protein A|protein FAM214A|family with sequence similarity 214 member A	atos homolog A	https://www.ensembl.org/Homo_sapiens/Gene/ExpressionAtlas?g=ENSG00000047346	http://www.ensembl.org/id/ENSG00000047346	https://www.ncbi.nlm.nih.gov/gene?term=(FAM214A[Gene Name]) AND Homo sapiens[Organism]	https://pubmed.ncbi.nlm.nih.gov/35381951 https://pubmed.ncbi.nlm.nih.gov/35121757 https://pubmed.ncbi.nlm.nih.gov/33645482	https://pubmed.ncbi.nlm.nih.gov/35381951 https://pubmed.ncbi.nlm.nih.gov/35121757 https://pubmed.ncbi.nlm.nih.gov/33645482	https://pubmed.ncbi.nlm.nih.gov/35381951 https://pubmed.ncbi.nlm.nih.gov/35121757 https://pubmed.ncbi.nlm.nih.gov/33645482
ENSG00000116701	NCF2	141.789	2.62634	5.14788e-09	5.12996e-07	Y	neutrophil cytosolic factor 2	NCF-2, NOXA2, P67-PHOX, P67PHOX	neutrophil cytosol factor 2|67 kDa neutrophil oxidase factor|NADPH oxidase activator 2|chronic granulomatous disease, autosomal 2|neutrophil NADPH oxidase factor 2|neutrophil cytosolic factor 2 (65kD, chronic granulomatous disease, autosomal 2)	neutrophil cytosolic factor 2	https://www.ensembl.org/Homo_sapiens/Gene/ExpressionAtlas?g=ENSG00000116701	http://www.ensembl.org/id/ENSG00000116701	https://www.ncbi.nlm.nih.gov/gene?term=(NCF2[Gene Name]) AND Homo sapiens[Organism]	https://pubmed.ncbi.nlm.nih.gov/36181646 https://pubmed.ncbi.nlm.nih.gov/36177003 https://pubmed.ncbi.nlm.nih.gov/36035208 https://pubmed.ncbi.nlm.nih.gov/35997928 https://pubmed.ncbi.nlm.nih.gov/35900637 https://pubmed.ncbi.nlm.nih.gov/35839011 https://pubmed.ncbi.nlm.nih.gov/35790963 https://pubmed.ncbi.nlm.nih.gov/35728702 https://pubmed.ncbi.nlm.nih.gov/35499057 https://pubmed.ncbi.nlm.nih.go…	https://pubmed.ncbi.nlm.nih.gov/36181646 https://pubmed.ncbi.nlm.nih.gov/36177003 https://pubmed.ncbi.nlm.nih.gov/36035208 https://pubmed.ncbi.nlm.nih.gov/35997928 https://pubmed.ncbi.nlm.nih.gov/35900637 https://pubmed.ncbi.nlm.nih.gov/35839011 https://pubmed.ncbi.nlm.nih.gov/35790963 https://pubmed.ncbi.nlm.nih.gov/35728702 https://pubmed.ncbi.nlm.nih.gov/35499057 https://pubmed.ncbi.nlm.nih.go…	https://pubmed.ncbi.nlm.nih.gov/36680322 https://pubmed.ncbi.nlm.nih.gov/36671813 https://pubmed.ncbi.nlm.nih.gov/36534309 https://pubmed.ncbi.nlm.nih.gov/36467613 https://pubmed.ncbi.nlm.nih.gov/36457990 https://pubmed.ncbi.nlm.nih.gov/36181646 https://pubmed.ncbi.nlm.nih.gov/36177003 https://pubmed.ncbi.nlm.nih.gov/36035208 https://pubmed.ncbi.nlm.nih.gov/36017103 https://pubmed.ncbi.nlm.nih.go…
ENSG00000070404	FSTL3	228.085	2.20687	7.20762e-09	7.09275e-07	Y	follistatin like 3	FLRG, FSRP	follistatin-related protein 3|follistatin-like 3 (secreted glycoprotein)|follistatin-like protein 3|follistatin-related gene protein	follistatin like 3	https://www.ensembl.org/Homo_sapiens/Gene/ExpressionAtlas?g=ENSG00000070404	http://www.ensembl.org/id/ENSG00000070404	https://www.ncbi.nlm.nih.gov/gene?term=(FSTL3[Gene Name]) AND Homo sapiens[Organism]	https://pubmed.ncbi.nlm.nih.gov/36502285 https://pubmed.ncbi.nlm.nih.gov/35711567 https://pubmed.ncbi.nlm.nih.gov/35664334 https://pubmed.ncbi.nlm.nih.gov/35655921 https://pubmed.ncbi.nlm.nih.gov/35528613 https://pubmed.ncbi.nlm.nih.gov/35511773 https://pubmed.ncbi.nlm.nih.gov/35510530 https://pubmed.ncbi.nlm.nih.gov/35484307 https://pubmed.ncbi.nlm.nih.gov/35315496 https://pubmed.ncbi.nlm.nih.go…	https://pubmed.ncbi.nlm.nih.gov/36502285 https://pubmed.ncbi.nlm.nih.gov/35711567 https://pubmed.ncbi.nlm.nih.gov/35664334 https://pubmed.ncbi.nlm.nih.gov/35655921 https://pubmed.ncbi.nlm.nih.gov/35528613 https://pubmed.ncbi.nlm.nih.gov/35511773 https://pubmed.ncbi.nlm.nih.gov/35510530 https://pubmed.ncbi.nlm.nih.gov/35484307 https://pubmed.ncbi.nlm.nih.gov/35315496 https://pubmed.ncbi.nlm.nih.go…	https://pubmed.ncbi.nlm.nih.gov/36660892 https://pubmed.ncbi.nlm.nih.gov/36587801 https://pubmed.ncbi.nlm.nih.gov/36502285 https://pubmed.ncbi.nlm.nih.gov/36440002 https://pubmed.ncbi.nlm.nih.gov/36325361 https://pubmed.ncbi.nlm.nih.gov/36276926 https://pubmed.ncbi.nlm.nih.gov/36245988 https://pubmed.ncbi.nlm.nih.gov/36209572 https://pubmed.ncbi.nlm.nih.gov/35711567 https://pubmed.ncbi.nlm.nih.go…
ENSG00000108932	SLC16A6	247.199	2.94244	8.70525e-09	8.46075e-07	Y	solute carrier family 16 member 6	MCT6, MCT7	monocarboxylate transporter 7|breast cancer protein BCY5|monocarboxylate transporter 6|solute carrier family 16, member 6 (monocarboxylic acid transporter 7)	solute carrier family 16 member 6	https://www.ensembl.org/Homo_sapiens/Gene/ExpressionAtlas?g=ENSG00000108932	http://www.ensembl.org/id/ENSG00000108932	https://www.ncbi.nlm.nih.gov/gene?term=(SLC16A6[Gene Name]) AND Homo sapiens[Organism]	https://pubmed.ncbi.nlm.nih.gov/36341328 https://pubmed.ncbi.nlm.nih.gov/35933992 https://pubmed.ncbi.nlm.nih.gov/35257743 https://pubmed.ncbi.nlm.nih.gov/32232919 https://pubmed.ncbi.nlm.nih.gov/30692937 https://pubmed.ncbi.nlm.nih.gov/24454846 https://pubmed.ncbi.nlm.nih.gov/23555315 https://pubmed.ncbi.nlm.nih.gov/23462296 https://pubmed.ncbi.nlm.nih.gov/22302940 https://pubmed.ncbi.nlm.nih.go…	https://pubmed.ncbi.nlm.nih.gov/36341328 https://pubmed.ncbi.nlm.nih.gov/35933992 https://pubmed.ncbi.nlm.nih.gov/35257743 https://pubmed.ncbi.nlm.nih.gov/32232919 https://pubmed.ncbi.nlm.nih.gov/30692937 https://pubmed.ncbi.nlm.nih.gov/24454846 https://pubmed.ncbi.nlm.nih.gov/23555315 https://pubmed.ncbi.nlm.nih.gov/23462296 https://pubmed.ncbi.nlm.nih.gov/22302940 https://pubmed.ncbi.nlm.nih.go…	https://pubmed.ncbi.nlm.nih.gov/36417410 https://pubmed.ncbi.nlm.nih.gov/36341328 https://pubmed.ncbi.nlm.nih.gov/36009735 https://pubmed.ncbi.nlm.nih.gov/35933992 https://pubmed.ncbi.nlm.nih.gov/35257743 https://pubmed.ncbi.nlm.nih.gov/33347826 https://pubmed.ncbi.nlm.nih.gov/32232919 https://pubmed.ncbi.nlm.nih.gov/30692937 https://pubmed.ncbi.nlm.nih.gov/28283079 https://pubmed.ncbi.nlm.nih.go…
ENSG00000189184	PCDH18	56.5978	-3.5392	9.10297e-09	8.79302e-07	Y	protocadherin 18	PCDH68L	protocadherin-18|protocadherin 68-like protein	protocadherin 18	https://www.ensembl.org/Homo_sapiens/Gene/ExpressionAtlas?g=ENSG00000189184	http://www.ensembl.org/id/ENSG00000189184	https://www.ncbi.nlm.nih.gov/gene?term=(PCDH18[Gene Name]) AND Homo sapiens[Organism]	https://pubmed.ncbi.nlm.nih.gov/31868331 https://pubmed.ncbi.nlm.nih.gov/31279844 https://pubmed.ncbi.nlm.nih.gov/29888653 https://pubmed.ncbi.nlm.nih.gov/29775430 https://pubmed.ncbi.nlm.nih.gov/29259037 https://pubmed.ncbi.nlm.nih.gov/28588296 https://pubmed.ncbi.nlm.nih.gov/26739415 https://pubmed.ncbi.nlm.nih.gov/26294325 https://pubmed.ncbi.nlm.nih.gov/24436137 https://pubmed.ncbi.nlm.nih.go…	https://pubmed.ncbi.nlm.nih.gov/31868331 https://pubmed.ncbi.nlm.nih.gov/31279844 https://pubmed.ncbi.nlm.nih.gov/29888653 https://pubmed.ncbi.nlm.nih.gov/29775430 https://pubmed.ncbi.nlm.nih.gov/29259037 https://pubmed.ncbi.nlm.nih.gov/28588296 https://pubmed.ncbi.nlm.nih.gov/26739415 https://pubmed.ncbi.nlm.nih.gov/26294325 https://pubmed.ncbi.nlm.nih.gov/24436137 https://pubmed.ncbi.nlm.nih.go…	https://pubmed.ncbi.nlm.nih.gov/35685361 https://pubmed.ncbi.nlm.nih.gov/32194642 https://pubmed.ncbi.nlm.nih.gov/31868331 https://pubmed.ncbi.nlm.nih.gov/31279844 https://pubmed.ncbi.nlm.nih.gov/29888653 https://pubmed.ncbi.nlm.nih.gov/29775430 https://pubmed.ncbi.nlm.nih.gov/29259037 https://pubmed.ncbi.nlm.nih.gov/29075151 https://pubmed.ncbi.nlm.nih.gov/28588296 https://pubmed.ncbi.nlm.nih.go…
[truncated: 28,272 more rows]
