# Supplementary material for: Impact of the m.13513G>A Variant on the Functions of the OXPHOS System and Cell Retrograde Signaling
Source: Curr Issues Mol Biol. 2023 Feb 22;45(3):1794–809. doi: 10.3390/cimb45030115 (PMC10047405; doi:10.3390/cimb45030115)
Supplement: Supplementary file 1 [file cimb-45-00115-s001.zip › Supplementary Table S3_new.xlsx]

## Sheet: GO terms Molecular Functions
p-value	adj_pval	OddsRatio	Term	count_DE_genes	DE_genes
0.00424443	0.0930841	366.48	aldehyde oxidase activity	1	AOX1
0.00424443	0.0930841	366.48	tryptophan 2,3-dioxygenase activity	1	TDO2
0.00565539	0.0930841	244.307	ryanodine-sensitive calcium-release channel activity	1	RYR3
0.00565539	0.0930841	244.307	calcium-induced calcium release activity	1	RYR3
0.0057236	0.0930841	4.30452	transporter activity	6	GRID1,NIPAL4,SLC24A4,FABP3,RYR3,ABCG1
0.00706442	0.0930841	183.22	carbonyl reductase (NADPH) activity	1	DHRS2
0.00706442	0.0930841	183.22	glucokinase activity	1	HKDC1
0.00706442	0.0930841	183.22	calcium, potassium:sodium antiporter activity	1	SLC24A4
0.00706442	0.0930841	183.22	fructokinase activity	1	HKDC1
0.00706442	0.0930841	183.22	mannokinase activity	1	HKDC1
0.00706442	0.0930841	183.22	phosphatidylcholine floppase activity	1	ABCG1
0.00847154	0.105352	146.568	molybdopterin cofactor binding	1	AOX1
0.00987673	0.105352	122.133	toxin transmembrane transporter activity	1	ABCG1
0.00987673	0.105352	122.133	icosatetraenoic acid binding	1	FABP3
0.00987673	0.105352	122.133	G protein-coupled glutamate receptor activity	1	GRM2
0.01128	0.114851	104.68	dipeptidyl-peptidase activity	1	FAP
0.0140808	0.133352	81.4089	oxidoreductase activity, acting on CH or CH2 groups	1	AOX1
0.0154784	0.133352	73.264	glucose binding	1	HKDC1
0.0154784	0.133352	73.264	calcium:cation antiporter activity	1	SLC24A4
0.0154784	0.133352	73.264	ATPase-coupled intramembrane lipid transporter activity	1	ABCG1
0.0164354	0.136353	11.0639	ligand-gated channel activity	2	GRID1,RYR3
0.0182678	0.146142	61.0467	filamin binding	1	DPYSL4
0.0219081	0.16213	9.46146	divalent inorganic cation transmembrane transporter activity	2	SLC24A4,RYR3
0.0224084	0.16213	5.45449	ion channel activity	3	GRID1,SLC24A4,RYR3
0.0224376	0.16213	48.8293	magnesium ion transmembrane transporter activity	1	NIPAL4
0.0238238	0.166767	45.775	long-chain fatty acid transporter activity	1	FABP3
0.0265904	0.180493	40.6844	ionotropic glutamate receptor activity	1	GRID1
0.0279709	0.184147	38.5411	cholesterol transfer activity	1	ABCG1
0.0293496	0.184147	36.612	carbohydrate kinase activity	1	HKDC1
0.029595	0.184147	4.88078	passive transmembrane transporter activity	3	GRID1,SLC24A4,RYR3
0.0307263	0.186019	34.8667	2 iron, 2 sulfur cluster binding	1	AOX1
0.0359907	0.202801	7.18889	carboxylic acid binding	2	FABP3,TDO2
0.0362145	0.202801	29.2816	oxidoreductase activity, acting on single donors with incorporation of molecular oxygen	1	TDO2
0.0362145	0.202801	29.2816	ligand-gated calcium channel activity	1	RYR3
0.040311	0.220236	26.14	intracellular ligand-gated ion channel activity	1	RYR3
0.0443908	0.236751	23.6065	solute:cation antiporter activity	1	SLC24A4
0.045747	0.23831	22.8675	FAD binding	1	AOX1
0.0488322	0.247916	2.56046	identical protein binding	6	FAP,AOX1,TDO2,SLAMF7,SYT16,ABCG1
0.0498045	0.247916	20.904	oxygen binding	1	TDO2

## Sheet: GO terms Biolgical Process
p-value	adj_pval	OddsRatio	Term	count_DE_genes	DE_genes
0.000130324	0.118726	148.854	phospholipid homeostasis	2	FABP3,ABCG1
0.0016117	0.228085	38.0142	intracellular lipid transport	2	FABP3,ABCG1
0.00275404	0.228085	28.656	protein homotetramerization	2	RYR3,TDO2
0.00397035	0.267414	392.479	melanocyte proliferation	1	FAP
0.0040666	0.267414	5.48721	ion homeostasis	5	SLC24A4,FABP3,RYR3,GRM2,ABCG1
0.00528745	0.267414	3.94921	ion transport	7	GRID1,NIPAL4,SLC24A4,FABP3,RYR3,GRM2,ABCG1
0.00529043	0.267414	261.639	regulation of collagen catabolic process	1	FAP
0.00529043	0.267414	261.639	glycoprotein transport	1	ABCG1
0.00529043	0.267414	261.639	negative regulation of cell proliferation involved in contact inhibition	1	FAP
0.00529043	0.267414	261.639	glutamate homeostasis	1	GRM2
0.00660884	0.267414	196.219	negative regulation of extracellular matrix disassembly	1	FAP
0.00660884	0.267414	196.219	tryptophan catabolic process to kynurenine	1	TDO2
0.00660884	0.267414	196.219	vitamin B6 metabolic process	1	AOX1
0.00660884	0.267414	196.219	regulation of phosphatidylcholine biosynthetic process	1	FABP3
0.00683909	0.267414	17.7212	positive regulation of lipid localization	2	FABP3,ABCG1
0.00712328	0.267414	17.3423	synaptic transmission, glutamatergic	2	GRID1,GRM2
0.00785691	0.267414	16.462	cholesterol homeostasis	2	FABP3,ABCG1
0.00792556	0.267414	156.967	nucleobase catabolic process	1	AOX1
0.00792556	0.267414	156.967	positive regulation of glomerular mesangial cell proliferation	1	SERPINB7
0.00924062	0.280607	130.799	adenylate cyclase-inhibiting G protein-coupled glutamate receptor signaling pathway	1	GRM2
0.00924062	0.280607	130.799	positive regulation of transforming growth factor beta1 production	1	SERPINB7
0.00924062	0.280607	130.799	cellular response to magnesium ion	1	RYR3
0.00975028	0.286532	14.6729	collagen metabolic process	2	FAP,SERPINB7
0.0102524	0.291872	14.2845	histone lysine methylation	2	DYDC2,PAX5
0.0118657	0.317931	98.0885	positive regulation of cholesterol biosynthetic process	1	ABCG1
0.0118657	0.317931	98.0885	detection of cell density	1	FAP
0.0131757	0.324408	87.1852	negative regulation of cholesterol storage	1	ABCG1
0.0131757	0.324408	87.1852	indolalkylamine catabolic process	1	TDO2
0.0131757	0.324408	87.1852	cellular response to caffeine	1	RYR3
0.0144841	0.334545	78.4625	chromatin silencing at telomere	1	DYDC2
0.0144841	0.334545	78.4625	negative regulation of histone H3-K9 methylation	1	PAX5
0.0157908	0.334545	71.3258	tryptophan metabolic process	1	TDO2
0.0157908	0.334545	71.3258	lateral ventricle development	1	PAX5
0.0157908	0.334545	71.3258	phospholipid efflux	1	ABCG1
0.0157908	0.334545	71.3258	positive regulation of phospholipid biosynthetic process	1	FABP3
0.0170958	0.342075	65.3785	negative regulation of macrophage derived foam cell differentiation	1	ABCG1
0.0170958	0.342075	65.3785	negative regulation of cytosolic calcium ion concentration	1	RYR3
0.0173479	0.342075	10.763	positive regulation of lipid metabolic process	2	FABP3,ABCG1
0.0183992	0.342075	60.3462	regulation of cholesterol esterification	1	ABCG1
0.0183992	0.342075	60.3462	regulation of fibrinolysis	1	FAP
0.0183992	0.342075	60.3462	regulation of cell proliferation involved in kidney development	1	SERPINB7
0.0197009	0.347621	56.0327	regulation of glomerulus development	1	SERPINB7
0.0197009	0.347621	56.0327	positive regulation of execution phase of apoptosis	1	FAP
0.0206774	0.347621	9.78261	homophilic cell adhesion via plasma membrane adhesion molecules	2	PCDHGB5,PCDHGB2
0.021001	0.347621	52.2944	low-density lipoprotein particle remodeling	1	ABCG1
0.021001	0.347621	52.2944	glomerular mesangium development	1	SERPINB7
0.021001	0.347621	52.2944	magnesium ion transmembrane transport	1	NIPAL4
0.0222994	0.347621	49.0234	mitotic cell cycle arrest	1	FAP
0.0222994	0.347621	49.0234	lipid import into cell	1	FABP3
0.0235962	0.347621	46.1373	high-density lipoprotein particle remodeling	1	ABCG1
0.0235962	0.347621	46.1373	sterol esterification	1	ABCG1
0.0235962	0.347621	46.1373	myeloid dendritic cell differentiation	1	DHRS2
0.0235962	0.347621	46.1373	cellular response to ATP	1	RYR3
0.0236581	0.347621	5.35344	divalent metal ion transport	3	NIPAL4,SLC24A4,RYR3
0.0244992	0.354266	8.91495	protein methylation	2	DYDC2,PAX5
0.0261847	0.356034	41.2763	purine nucleobase metabolic process	1	AOX1
0.0261847	0.356034	41.2763	negative regulation of adenylate cyclase activity	1	GRM2
0.0261847	0.356034	41.2763	positive regulation of cholesterol efflux	1	ABCG1
0.0261847	0.356034	41.2763	positive regulation of amyloid-beta formation	1	ABCG1
0.0267671	0.357587	8.49078	positive regulation of peptide secretion	2	RASL10B,ABCG1
0.0274765	0.357587	39.2104	positive regulation of steroid biosynthetic process	1	ABCG1
0.0274765	0.357587	39.2104	reverse cholesterol transport	1	ABCG1
0.0300552	0.375693	35.642	amine catabolic process	1	TDO2
0.0303824	0.375693	4.84276	organic anion transport	3	FABP3,GRM2,ABCG1
0.0304579	0.375693	7.90498	regulation of lipid biosynthetic process	2	FABP3,ABCG1
0.0313421	0.375693	34.0906	indole-containing compound metabolic process	1	TDO2
0.0313421	0.375693	34.0906	carbohydrate phosphorylation	1	HKDC1
0.0313421	0.375693	34.0906	amelogenesis	1	SLC24A4
0.0326273	0.38107	32.6684	intracellular cholesterol transport	1	ABCG1
0.0326273	0.38107	32.6684	benzene-containing compound metabolic process	1	TDO2
0.0339109	0.381393	31.36	positive regulation of collagen biosynthetic process	1	SERPINB7
0.0339109	0.381393	31.36	ionotropic glutamate receptor signaling pathway	1	GRID1
0.0339109	0.381393	31.36	glucose 6-phosphate metabolic process	1	HKDC1
0.0364732	0.39531	29.034	aromatic amino acid family catabolic process	1	TDO2
0.0364732	0.39531	29.034	kidney vasculature development	1	SERPINB7
0.0364732	0.39531	29.034	regulation of fatty acid transport	1	FABP3
0.037226	0.39531	7.0674	protein complex oligomerization	2	RYR3,TDO2
0.0377519	0.39531	27.9955	positive regulation of sterol transport	1	ABCG1
0.0377519	0.39531	27.9955	regulation of B cell receptor signaling pathway	1	PAX5
0.039451	0.408407	2.72447	homeostatic process	6	HKDC1,SLC24A4,FABP3,RYR3,GRM2,ABCG1
0.0403044	0.412554	26.1264	protein-lipid complex remodeling	1	ABCG1
0.0415783	0.420864	25.2823	regulation of fatty acid oxidation	1	FABP3
0.0426278	0.426746	3.36275	oxidation-reduction process	4	DHRS2,AOX1,FABP3,TDO2
0.0461001	0.456492	6.26323	cellular ketone metabolic process	2	FABP3,TDO2
0.0466573	0.457041	22.3881	regulation of transforming growth factor beta production	1	SERPINB7
0.0477008	0.461846	4.02096	nucleobase-containing small molecule metabolic process	3	HKDC1,AOX1,TDO2
0.0491872	0.461846	21.1757	triglyceride catabolic process	1	FABP3
0.0491872	0.461846	21.1757	foam cell differentiation	1	ABCG1
0.049653	0.461846	6.00356	lipid modification	2	FABP3,ABCG1

## Sheet: GO terms Cellular Components
p-value	adj_pval	OddsRatio	Term	count_DE_genes	DE_genes
0.00582889	0.430707	19.1844	sarcoplasm	2	FABP3,RYR3
0.0085598	0.430707	144.637	invadopodium membrane	1	FAP
0.0121162	0.430707	12.9873	integral component of postsynaptic membrane	2	GRID1,GRM2
0.0170489	0.430707	65.7239	spanning component of plasma membrane	1	SLC24A4
0.0170489	0.430707	65.7239	Set1C/COMPASS complex	1	DYDC2
0.018457	0.430707	60.2438	MLL3/4 complex	1	DYDC2
0.023423	0.430707	9.08396	intrinsic component of synaptic membrane	2	GRID1,GRM2
0.0236004	0.430707	2.30791	integral component of membrane	13	PCDHGB5,FAP,TM4SF18,GRID1,SEL1L3,NIPAL4,SLC24A4,PCDHGB2,CD163L1,RYR3,GRM2,SLAMF7,ABCG1
0.0268643	0.435799	40.1502	astrocyte projection	1	GRM2
0.031042	0.453212	34.4092	lamellipodium membrane	1	FAP
0.0475801	0.600615	21.8833	smooth endoplasmic reticulum	1	RYR3
