# Supplementary material for: Impact of the m.13513G>A Variant on the Functions of the OXPHOS System and Cell Retrograde Signaling
Source: Curr Issues Mol Biol. 2023 Feb 22;45(3):1794–809. doi: 10.3390/cimb45030115 (PMC10047405; doi:10.3390/cimb45030115)
Supplement: Supplementary file 1 [file cimb-45-00115-s001.zip › Supplementary Table S4_new.xlsx]

## Sheet: GO terms Molecular Functions
p-value	adj_pval	OddsRatio	Term	count_DE_genes	DE_genes
2.63529e-06	0.00237009	1.94156	molecular function regulator activity	70	CCN3,TFPI2,SERPINF1,SERPIND1,APLN,RGCC,GREM1,IL24,TBC1D4,SEMA5A,IL11,IQGAP2,CD70,RGS4,PDGFB,EDN1,VEGFA,ANXA1,FRY,SPP1,VAV3,MAP2K6,ADM2,CRLF1,TXNIP,TGFA,A2M,ARHGAP18,SCG2,SCG5,ARHGAP28,NCF2,RCAN2,RGS2,INHBA,PINLYP,SLPI,ADRB1,ESR2,HBEGF,SFN,GPRC5B,COL7A1,BMP4,DKK2,BST2,PKIB,CACNG6,SPINT2,RAPGEF4,IL18,CXCL3,ADRB2,PYCARD,ALK,CSF3,SHH,RASGRP1,ADGRB3,RASGRF1,AFAP1L2,RIMS1,WNK2,CACNG4,PPP1R16B,RGS7,SEMA…
5.14118e-06	0.00237009	2.51849	calcium ion binding	34	PCDH7,CDH6,LTBP1,PLA2G4A,PRSS3,EDIL3,TGM2,DYSF,THBD,SULF2,ANXA1,LPL,ADAM8,ADGRL3,DNER,CDH23,PCDH18,DLL4,REPS2,TENM2,SYT12,CALB2,RAB11FIP4,MEGF6,SHH,RASGRP1,NKD1,DGKG,S100A8,ACTN2,PCDH10,CLSTN2,CDH11,MMP13
7.99012e-06	0.00245563	3.83726	cytokine activity	17	GREM1,IL24,IL11,CD70,EDN1,VEGFA,SPP1,CRLF1,SCG2,INHBA,BMP4,IL18,CXCL3,CSF3,BMP5,TGFB2,IL1B
1.38097e-05	0.00261992	2.75201	signaling receptor activator activity	26	CCN3,APLN,GREM1,IL24,SEMA5A,IL11,CD70,PDGFB,EDN1,VEGFA,SPP1,ADM2,CRLF1,TGFA,SCG2,INHBA,HBEGF,BMP4,IL18,CXCL3,CSF3,SHH,SEMA6D,BMP5,TGFB2,IL1B
1.59383e-05	0.00261992	2.03233	signaling receptor binding	67	CCN3,APLN,ITGBL1,GREM1,IL24,SEMA5A,EFNB1,IL11,EDIL3,CD70,IGFBP2,PDGFB,EDN1,VEGFA,IRS2,ANXA1,LPL,SPP1,VAV3,FZD8,LAMA2,DNER,ADM2,CRLF1,TGFA,A2M,SCG2,DLL4,ITGB4,INHBA,HOMER3,AGR2,ADRB1,ESR2,HBEGF,PLAT,GPRC5B,PPARGC1A,BMP4,FES,DKK2,ANO1,ITGA10,ITGB2,DIAPH2,IL18,CXCL3,PYCARD,GNAL,PTPRC,CSF3,SHH,ICAM5,MAP7,FABP4,RASGRF1,AVPR1A,S100A8,ACTN2,PTPRZ1,VWDE,CACNG4,SEMA6D,BMP5,TGFB2,IL1B,CD74
1.70493e-05	0.00261992	1.94747	molecular transducer activity	56	STRA6,LTBP1,VIPR1,SPHK1,COLEC12,CSPG4,IL7R,THBD,NPR2,PAQR5,FZD8,ADGRL3,DNER,CRLF1,LEPR,NTRK2,PGR,EPHB1,RORB,OSCAR,HRH2,GPC4,ADRB1,ESR2,GPRC5B,GPR68,CSF3R,UNC5C,PTPRB,ROR1,ITGB2,CALCRL,ADRB2,NR5A2,GPR4,LGR5,EPHA3,ALK,PTPRC,GRIA4,ADGRB3,CHRM3,AVPR1A,CXCR2,PTPRZ1,UNC5B,SCARF1,CSF2RB,HPGD,ACKR3,C3AR1,LPAR1,CNR1,CD74,ADGRF4,ADGRB1
0.000395172	0.0493251	3.68714	integrin binding	11	CCN3,ITGBL1,EDIL3,SPP1,ITGB4,ITGA10,ITGB2,ICAM5,ACTN2,PTPRZ1,IL1B
0.000430349	0.0493251	13.7272	heparan sulfate proteoglycan binding	4	SEMA5A,LPL,CFH,PTPRC
0.000481481	0.0493251	4.2756	metalloendopeptidase activity	9	ADAM8,PHEX,PAPPA2,PAPPA,MMP1,MMP3,MMP9,ADAMTS17,MMP13
0.000543988	0.0501557	3.53945	growth factor activity	11	CCN3,IL11,PDGFB,VEGFA,TGFA,INHBA,HBEGF,BMP4,CSF3,BMP5,TGFB2
0.000669802	0.0561416	6.28919	peptide hormone binding	6	VIPR1,NPR2,LEPR,INHBA,CALCRL,AVPR1A
0.000970798	0.0745897	3.08672	voltage-gated channel activity	12	KCNK10,KCNK6,KCNA2,NALCN,ANO1,CACNG6,KCNN3,KCNB2,KCNC1,CACNG4,SNAP25,CNR1
0.00125083	0.0887126	95.6499	interleukin-8 binding	2	A2M,CXCR2
0.00207118	0.136402	3.42028	cytokine binding	11	LTBP1,GREM1,NOG,CRLF1,A2M,LEPR,CSF3R,CXCR2,ACKR3,CD74,CHRD
0.00246756	0.142193	47.8223	palmitoyl-CoA oxidase activity	2	ACOX2,ACADL
0.00246756	0.142193	47.8223	brain-derived neurotrophic factor binding	2	A2M,NTRK2
0.00266135	0.143133	13.0706	BMP receptor binding	3	BMP4,PYCARD,BMP5
0.00279436	0.143133	7.68256	receptor serine/threonine kinase binding	4	INHBA,BMP4,PYCARD,BMP5
0.00300223	0.145687	3.2245	voltage-gated cation channel activity	9	KCNK6,KCNA2,CACNG6,KCNN3,KCNB2,KCNC1,CACNG4,SNAP25,CNR1
0.003485	0.159722	2.09539	DNA-binding transcription activator activity, RNA polymerase II-specific	19	ETV1,CEBPB,FOXF1,ALX4,PGR,ZNF175,RORB,TFCP2L1,PBX1,ZNF845,EBF2,CSRNP3,NR5A2,EGR3,FOXA1,DMRT2,HOXB5,GRHL3,MAFB
0.00403079	0.159722	6.85829	epidermal growth factor receptor binding	4	VAV3,TGFA,AGR2,HBEGF
0.00405664	0.159722	31.8798	phosphatidylserine flippase activity	2	ATP8B1,ATP8A1
0.00412724	0.159722	3.70968	serine-type endopeptidase inhibitor activity	7	TFPI2,SERPINF1,SERPIND1,A2M,SLPI,COL7A1,SPINT2
0.00415763	0.159722	1.79555	lipid binding	28	STRA6,PLA2G4A,SPHK1,IQGAP2,DYSF,JPH2,ANXA1,LPL,PLEKHN1,ATP8B1,PAQR5,PGR,ACOX2,ESR2,SYT12,FES,ZFYVE28,CLVS2,NR5A2,RASGRP1,FABP4,DGKG,S100A8,ACTN2,STXBP6,RBP7,LPAR1,ADGRB1
0.00474943	0.175159	10.268	transmembrane receptor protein tyrosine phosphatase activity	3	PTPRB,PTPRC,PTPRZ1
0.00538989	0.191134	4.80775	extracellular matrix binding	5	VEGFA,NTN4,TINAGL1,SPP1,SHH
0.0060023	0.195261	23.9085	laminin-1 binding	2	NTN4,SHH
0.0060023	0.195261	23.9085	coreceptor activity involved in Wnt signaling pathway, planar cell polarity pathway	2	GPC4,ROR1
0.00619092	0.195261	5.99967	chemoattractant activity	4	PDGFB,VEGFA,SCG2,BMP4
0.00649523	0.195261	3.85115	amyloid-beta binding	6	BCHE,ITGB2,ADRB2,GRIA4,TGFB2,CD74
0.00656517	0.195261	8.98354	narrow pore channel activity	3	KCNK10,KCNK6,NALCN
0.00725723	0.209099	4.45063	monocarboxylic acid transmembrane transporter activity	5	ABCG2,SLC16A6,ABCC3,CEACAM1,SLC27A2
0.00751283	0.209904	1.79062	protein homodimerization activity	24	PTGS2,GREM1,HMGCS1,PDGFB,VEGFA,CEBPB,LPL,NOG,ALDH1A3,ABCG2,NTRK2,TENM2,ACOX2,CEACAM1,BST2,ANO1,ADRB2,PYCARD,RAB11FIP4,TMEM266,GSTA4,FOXP2,SOX6,TGFB2
0.00814531	0.220882	2.73412	heparin binding	9	CCN3,SERPIND1,VEGFA,LPL,CFH,NAV2,HBEGF,BMP4,PTPRC
0.0094747	0.234332	2.01487	amide binding	16	PLA2G4A,CEMIP,VIPR1,TMEM158,NPR2,BCHE,LEPR,INHBA,ITGB2,CALCRL,ADRB2,GRIA4,AVPR1A,ACADL,TGFB2,CD74
0.0109027	0.234332	15.9372	guanylate cyclase activity	2	NPR2,GUCY1A2
0.0109027	0.234332	15.9372	morphogen activity	2	GREM1,SHH
0.0127125	0.234332	6.84271	G-protein alpha-subunit binding	3	RGS4,RGS2,RGS7
0.0127125	0.234332	6.84271	R-SMAD binding	3	RGCC,ANKRD1,LDLRAD4
0.0138284	0.234332	13.6597	adrenergic receptor activity	2	ADRB1,ADRB2
0.0138284	0.234332	13.6597	vascular endothelial growth factor receptor 2 binding	2	GREM1,VEGFA
0.0138284	0.234332	13.6597	phosphatidylserine floppase activity	2	ATP8B1,ATP8A1
0.0142295	0.234332	6.53131	Notch binding	3	CCN3,DNER,DLL4
0.0157194	0.234332	4.46214	scavenger receptor activity	4	COLEC12,LOXL4,SCARF1,ACKR3
0.0157194	0.234332	4.46214	coreceptor activity	4	CSPG4,GPC4,ROR1,ACKR3
0.0161457	0.234332	2.80862	transmembrane transporter binding	7	ANK1,AKAP6,TCAF2,PYCARD,KCNC1,ACTN2,RIMS1
0.0170523	0.234332	11.9516	superoxide-generating NADPH oxidase activator activity	2	PDGFB,NCF2
0.0170523	0.234332	11.9516	oxidoreductase activity, acting on the CH-CH group of donors, oxygen as acceptor	2	ACOX2,ACADL
0.0184651	0.234332	1.28545	cation binding	107	PTGS2,PCDH7,CDH6,LTBP1,PLA2G4A,PRSS3,LPXN,EDIL3,SPHK1,COLEC12,TGM2,HBA1,DYSF,LIMCH1,THBD,SULF2,ANXA1,LMO7,LFNG,LPL,ATP8B1,ADAM8,VAV3,PHEX,ADGRL3,DNER,CDH23,BCHE,PCDH18,PGR,ZNF175,DLL4,RORB,PAPPA2,REPS2,ATP8A1,HR,MOXD1,NEURL1B,TENM2,PGM5,ZNF845,LHX1,ZNF160,ESR2,SYT12,ANO1,ZFYVE28,ALOXE3,ITGA10,EBF2,PRUNE2,ZNF100,GALNT17,ITGB2,ALPP,ZNF483,CALB2,PAPPA,MMP1,MMP3,NT5M,ZNF385D,NR5A2,ZNF813,RAB11FIP4,GN…
0.0199446	0.234332	2.3337	serine hydrolase activity	9	PRSS3,ADAM8,PLAT,MMP1,MMP3,NAALAD2,MMP9,HTRA3,MMP13
0.020561	0.234332	10.623	dystroglycan binding	2	MAP2,AGR2
0.020561	0.234332	10.623	cardiolipin binding	2	PLEKHN1,ATP8B1
0.0220349	0.247758	3.99622	nuclear receptor activity	4	PGR,RORB,ESR2,NR5A2
0.0232973	0.249446	5.32033	Wnt-protein binding	3	FZD8,ROR1,APCDD1L
0.0234755	0.249446	3.24415	transmembrane receptor protein kinase activity	5	LTBP1,NTRK2,EPHB1,EPHA3,ALK
0.0235485	0.249446	2.26294	enzyme inhibitor activity	17	TFPI2,SERPINF1,SERPIND1,IQGAP2,ANXA1,FRY,TXNIP,A2M,SCG5,RGS2,PINLYP,SLPI,SFN,COL7A1,BST2,PKIB,SPINT2
0.0243415	0.249446	9.56021	adenylate cyclase binding	2	AKAP6,ADRB2
0.0249365	0.249446	3.83595	calcium-dependent phospholipid binding	4	PLA2G4A,DYSF,ANXA1,SYT12
0.0254094	0.249446	5.13003	lipoprotein particle binding	3	COLEC12,LPL,SCARF1
0.0262869	0.249446	2.34922	extracellular matrix structural constituent	8	TFPI2,LTBP1,EDIL3,TINAGL1,LAMA2,COL7A1,COL8A2,ACAN
0.0266043	0.249446	1.48556	transmembrane signaling receptor activity	47	LTBP1,VIPR1,SPHK1,IL7R,THBD,FZD8,ADGRL3,DNER,CRLF1,LEPR,NTRK2,EPHB1,RORB,OSCAR,HRH2,ADRB1,GPRC5B,GPR68,CSF3R,UNC5C,PTPRB,ROR1,ITGB2,CALCRL,ADRB2,GPR4,LGR5,EPHA3,ALK,PTPRC,GRIA4,ADGRB3,CHRM3,AVPR1A,CXCR2,PTPRZ1,UNC5B,SCARF1,CSF2RB,HPGD,ACKR3,C3AR1,LPAR1,CNR1,CD74,ADGRF4,ADGRB1
0.0270556	0.249446	3.11723	PDZ domain binding	5	FZD8,ADRB1,NKD1,CXXC4,ADGRB1
0.0279054	0.249446	2.32066	serine-type endopeptidase activity	8	PRSS3,ADAM8,PLAT,MMP1,MMP3,MMP9,HTRA3,MMP13
0.0283811	0.249446	8.69062	phospholipase inhibitor activity	2	ANXA1,PINLYP
0.0283811	0.249446	8.69062	titin binding	2	ANKRD1,ACTN2
0.0283811	0.249446	8.69062	insulin-like growth factor I binding	2	IGFBP2,ITGB4
0.0283811	0.249446	8.69062	co-receptor binding	2	BMP4,DKK2
0.0287399	0.249446	2.30663	phosphatidylinositol phosphate binding	8	PLA2G4A,IQGAP2,JPH2,PLEKHN1,ZFYVE28,CLVS2,ACTN2,STXBP6
0.0299317	0.249446	4.7875	delayed rectifier potassium channel activity	3	KCNA2,KCNB2,KCNC1
0.0326678	0.249446	7.96596	platelet-derived growth factor receptor binding	2	PDGFB,VEGFA
0.0326678	0.249446	7.96596	ABC-type xenobiotic transporter activity	2	ABCG2,ABCC3
0.0348489	0.249446	4.48778	amide transmembrane transporter activity	3	ABCG2,SLC47A1,SLC14A1
0.0349701	0.249446	3.42381	phosphatidylserine binding	4	JPH2,PLEKHN1,SYT12,ADGRB1
0.0371895	0.249446	7.35279	long-chain fatty acid binding	2	FABP4,S100A8
0.0371895	0.249446	7.35279	Wnt-activated receptor activity	2	FZD8,ROR1
0.0387257	0.249446	2.8117	cytokine receptor activity	8	IL7R,CRLF1,LEPR,CSF3R,CXCR2,CSF2RB,ACKR3,CD74
0.0401261	0.249446	2.15055	peptidase inhibitor activity	8	TFPI2,SERPINF1,SERPIND1,A2M,SLPI,COL7A1,BST2,SPINT2
0.0404146	0.249446	2.2893	peptide receptor activity	7	VIPR1,NPR2,CALCRL,LGR5,AVPR1A,CXCR2,ACKR3
0.0404146	0.249446	2.2893	potassium ion transmembrane transporter activity	7	KCNK10,KCNK6,KCNA2,KCNN3,KCNB2,KCNC1,SNAP25
0.0405578	0.249446	1.41248	RNA polymerase II cis-regulatory region sequence-specific DNA binding	34	ETV1,CEBPB,FOXQ1,FOXF1,PGR,ZNF175,RORB,TFCP2L1,PBX1,ZNF845,DACH1,ZNF160,ESR2,EBF2,ZNF100,ZNF483,CUX2,NR5A2,ZNF813,PROX1,ZNF423,EGR3,ZFP82,FOXA1,DMRT2,HOXB5,ZNF736,GRHL3,ZNF680,FOXP2,SOX6,STAT5A,MAFB,ZNF708
0.0410587	0.249446	1.69892	ion channel activity	15	KCNK10,KCNK6,KCNA2,PIEZO2,NALCN,ANO1,SCNN1A,CACNG6,KCNN3,KCNB2,GRIA4,KCNC1,CACNG4,SNAP25,CNR1
0.0415879	0.249446	6.85943	insulin-like growth factor binding	4	CCN3,IGFBP2,ITGB4,HTRA3
0.041935	0.249446	6.82721	retinol binding	2	STRA6,RBP7
0.041935	0.249446	6.82721	potassium ion leak channel activity	2	KCNK10,KCNK6
0.041935	0.249446	6.82721	bioactive lipid receptor activity	2	SPHK1,LPAR1
0.041935	0.249446	6.82721	NAD+ binding	2	ALDH1A3,HPGD
0.0425415	0.251252	3.19982	glycosaminoglycan binding	14	CCN3,SERPIND1,CEMIP,SEMA5A,VEGFA,SULF2,LPL,CFH,NAV2,HBEGF,BMP4,PTPRC,SHH,ACAN
0.0427837	0.251252	3.19484	cell adhesion mediator activity	4	ANXA1,GLDN,ITGA10,STXBP6
0.0468931	0.268543	6.37171	NAD+ kinase activity	2	SPHK1,DGKG
0.0468931	0.268543	6.37171	transmembrane-ephrin receptor activity	2	EPHB1,EPHA3
0.0468931	0.268543	6.37171	long-chain fatty acid transporter activity	2	SLC27A2,FABP4
0.0468931	0.268543	6.37171	flippase activity	2	ATP8B1,ATP8A1
0.0476551	0.271222	1.63262	passive transmembrane transporter activity	16	KCNK10,KCNK6,KCNA2,PIEZO2,NALCN,ANO1,SCNN1A,CACNG6,SLC14A1,KCNN3,KCNB2,GRIA4,KCNC1,CACNG4,SNAP25,CNR1
0.0479909	0.271458	2.06881	endopeptidase regulator activity	8	TFPI2,SERPINF1,SERPIND1,A2M,SLPI,COL7A1,BST2,SPINT2

## Sheet: GO terms Biolgical Process
p-value	adj_pval	OddsRatio	Term	count_DE_genes	DE_genes
6.75594e-13	3.84683e-09	2.72985	localization of cell	82	CCN3,PTGS2,SERPINF1,MTUS1,RGCC,ITGBL1,GREM1,CEMIP,PRSS3,IL24,SEMA5A,EFNB1,LPXN,SPHK1,LIMCH1,CSPG4,PDGFB,EDN1,VEGFA,IRS2,PLK2,NTN4,ANXA1,JCAD,NOG,FOXF1,ADAM8,VAV3,LAMA2,ADGRL3,DNER,ARHGAP18,SCG2,NTRK2,EPHB1,DLL4,ATP8A1,ITGB4,DACH1,LHX1,GPC4,HBEGF,PLAT,BMP4,FES,CEACAM1,BST2,ARID5B,CSF3R,UNC5C,SPINT2,ACTA2,ITGB2,TCAF2,CXCL3,PYCARD,TSPAN11,PROX1,EGR3,EPHA3,PTPRC,SHH,MMP9,ABI3,NEDD9,CXCR2,S100A8,STAT5…
4.30145e-11	9.16712e-08	2.65984	positive regulation of cell communication	81	CCN3,PTGS2,GREM1,SEMA5A,IL11,SPHK1,ANKRD1,TGM2,RGS4,CSPG4,PDGFB,IL7R,EDN1,VEGFA,IRS2,SULF2,NPR2,PLK2,LFNG,JCAD,SPP1,ADAM8,LURAP1L,FZD8,LAMA2,MAP2K6,TGFA,NTRK2,PTPN22,DLL4,INHBA,CYFIP2,DOK6,AKAP6,AGR2,HBEGF,G0S2,SYT12,GPRC5B,GPR68,BMP4,DKK2,BST2,ANO1,ROR1,ACTA2,IL18,CALB2,CUX2,ADRB2,PYCARD,GPR4,LGR5,PROX1,ZNF423,ALK,PTPRC,CSF3,SHH,RASGRP1,FOXA1,MMP9,NKD1,RASGRF1,S100A8,AFAP1L2,UNC5B,RIMS1,LAPTM5,W…
4.82988e-11	9.16712e-08	2.65202	positive regulation of signaling	81	CCN3,PTGS2,GREM1,SEMA5A,IL11,SPHK1,ANKRD1,TGM2,RGS4,CSPG4,PDGFB,IL7R,EDN1,VEGFA,IRS2,SULF2,NPR2,PLK2,LFNG,JCAD,SPP1,ADAM8,LURAP1L,FZD8,LAMA2,MAP2K6,TGFA,NTRK2,PTPN22,DLL4,INHBA,CYFIP2,DOK6,AKAP6,AGR2,HBEGF,G0S2,SYT12,GPRC5B,GPR68,BMP4,DKK2,BST2,ANO1,ROR1,ACTA2,IL18,CALB2,CUX2,ADRB2,PYCARD,GPR4,LGR5,PROX1,ZNF423,ALK,PTPRC,CSF3,SHH,RASGRP1,FOXA1,MMP9,NKD1,RASGRF1,S100A8,AFAP1L2,UNC5B,RIMS1,LAPTM5,W…
7.67759e-11	1.09291e-07	2.96682	regulation of cell motility	55	CCN3,PTGS2,SERPINF1,MTUS1,RGCC,GREM1,CEMIP,IL24,SEMA5A,SPHK1,LIMCH1,PDGFB,EDN1,VEGFA,IRS2,PLK2,ANXA1,JCAD,NOG,FOXF1,ADAM8,LAMA2,ARHGAP18,DLL4,ATP8A1,DACH1,HBEGF,BMP4,FES,CEACAM1,BST2,UNC5C,SPINT2,ACTA2,TCAF2,PYCARD,PROX1,PTPRC,SHH,MMP9,ABI3,NEDD9,STAT5A,IFITM1,ACKR3,C3AR1,LDLRAD4,SEMA6D,BMP5,TGFB2,IL1B,CD74,ADTRP,CHRD,ADGRB1
1.14196e-10	1.30047e-07	5.4686	angiogenesis	44	CCN3,PTGS2,SERPINF1,APLN,RGCC,GREM1,SEMA5A,SPHK1,CSPG4,EDN1,VEGFA,PLK2,ANXA1,JCAD,ADAM8,VAV3,TNFAIP2,FZD8,ADM2,TGFA,SCG2,LEPR,EPHB1,DLL4,BMP4,CEACAM1,PTPRB,THSD7A,CALCRL,IL18,GPR4,EGR3,SHH,ADGRB3,COL8A2,UNC5B,PPP1R16B,ACKR3,C3AR1,TGFB2,IL1B,ADTRP,CNMD,ADGRB1
4.2846e-10	4.06608e-07	2.58847	generation of neurons	65	SERPINF1,SEMA5A,EFNB1,NCAM2,EDN1,VEGFA,ETV1,MAP2,NTN4,FRY,CEBPB,NOG,SPP1,ATP8B1,FZD8,LAMA2,ADGRL3,DNER,CDH23,BCHE,NTRK2,GPRIN3,EPHB1,DLL4,COBL,RORB,RGS2,INHBA,TENM2,CYFIP2,DISP3,PBX1,SLITRK2,LHX1,GPRC5B,BMP4,FES,GLDN,UNC5C,ROR1,SLITRK5,CUX2,PROX1,EPHA3,ALK,SDK2,SHH,FOXA1,ADGRB3,DGKG,ABI3,RASGRF1,PTPRZ1,UNC5B,RIMS1,SCARF1,TSPAN2,SNAP25,CDH11,LPAR1,SEMA6D,BMP5,CNR1,TGFB2,ADGRB1
6.06127e-10	4.93041e-07	4.00545	vasculature development	52	CCN3,PTGS2,SERPINF1,APLN,STRA6,RGCC,GREM1,SEMA5A,SPHK1,CSPG4,PDGFB,EDN1,VEGFA,PLK2,ANXA1,JCAD,NOG,FOXF1,ADAM8,VAV3,TNFAIP2,FZD8,ADM2,TGFA,SCG2,LEPR,NTRK2,EPHB1,DLL4,BMP4,CEACAM1,PTPRB,ACTA2,THSD7A,CALCRL,IL18,GPR4,PROX1,EGR3,SHH,ADGRB3,COL8A2,UNC5B,HPGD,PPP1R16B,ACKR3,C3AR1,TGFB2,IL1B,ADTRP,CNMD,ADGRB1
7.92113e-10	5.20541e-07	2.49421	response to endogenous stimulus	71	PTGS2,SERPINF1,APLN,LTBP1,GREM1,TBC1D4,LPXN,IGFBP2,ANKRD1,TGM2,RGS4,PDGFB,EDN1,IRS2,SULF2,ANXA1,CEBPB,LPL,NOG,SPP1,PHEX,SESN3,GAS2L1,TXNIP,A2M,BCHE,LEPR,NTRK2,PTPN22,FSTL3,PGR,DLL4,INHBA,HRH2,SPRY1,AKAP6,LHX1,ESR2,PLAT,BMP4,CEACAM1,ANO1,SCNN1A,SPINT2,ITGB2,PAPPA,ADRB2,NR5A2,LGR5,GNAL,ZNF423,EGR3,ALK,FOXA1,LMO2,PDK4,KCNC1,CHRM3,AVPR1A,ACTN2,SOX6,HPGD,PDE3A,STAT5A,HTRA3,LDLRAD4,BMP5,TGFB2,IL1B,ADTR…
8.22772e-10	5.20541e-07	1.90264	cellular response to stimulus	213	CCN3,TFPI2,PTGS2,SERPINF1,KCNK10,CDH6,MTUS1,APLN,RGCC,DEPTOR,ITGBL1,LTBP1,GREM1,PLA2G4A,BMF,IL24,VIPR1,TBC1D4,SEMA5A,EFNB1,IL11,LPXN,SPHK1,SHISA3,IQGAP2,COLEC12,CD70,IGFBP2,ANKRD1,TGM2,RGS4,HBA1,CSPG4,PDGFB,IL7R,EDN1,VEGFA,SLC6A9,IRS2,SULF2,NPR2,PLK2,ANXA1,CEBPB,LFNG,LPL,JCAD,NOG,FOXF1,SPP1,ADAM8,VAV3,LURAP1L,FZD8,PHEX,SESN3,ADGRL3,DNER,SH3TC2,MAP2K6,ABCG2,ADM2,GAS2L1,CRLF1,TXNIP,TGFA,ARHGAP18,SC…
1.40987e-09	8.02778e-07	2.48044	positive regulation of response to stimulus	91	CCN3,PTGS2,RGCC,GREM1,PLA2G4A,SEMA5A,IL11,LPXN,SPHK1,ANKRD1,TGM2,RGS4,CSPG4,PDGFB,IL7R,EDN1,THBD,VEGFA,SULF2,NPR2,PLK2,ANXA1,CEBPB,LFNG,LPL,JCAD,ADAM8,VAV3,LURAP1L,FZD8,MAP2K6,CFH,TGFA,A2M,SCG2,NTRK2,PTPN22,SKAP1,DLL4,PLPP4,INHBA,CYFIP2,DOK6,ACOX2,AKAP6,AGR2,HBEGF,G0S2,THEMIS2,GPRC5B,BMP4,DKK2,CEACAM1,BST2,ROR1,ACTA2,ITGB2,IL18,CUX2,ADRB2,PYCARD,GPR4,LGR5,PROX1,ZNF423,ALK,PTPRC,CSF3,SHH,RASGRP1,F…
2.04223e-08	1.05713e-05	2.39764	regulation of phosphate metabolic process	60	PTGS2,RGCC,DEPTOR,GREM1,CEMIP,IL24,IL11,SPHK1,LIMCH1,CSPG4,PDGFB,EDN1,VEGFA,IRS2,NOG,ADAM8,VAV3,FZD8,MAP2K6,CRLF1,TGFA,LEPR,NTRK2,PTPN22,EPHB1,RGS2,INHBA,SPRY1,HBEGF,SFN,GPRC5B,PPARGC1A,BMP4,CEACAM1,ZFYVE28,PKIB,PTPRB,ROR1,ITGB2,IL18,ADRB2,PYCARD,PROX1,EPHA3,ALK,PTPRC,CSF3,RASGRP1,MMP9,FABP4,PDK4,NEDD9,AFAP1L2,PPP1R16B,LDLRAD4,BMP5,TGFB2,IL1B,CD74,ADTRP
2.43877e-08	1.1572e-05	3.96501	epithelium migration	26	CCN3,PTGS2,SERPINF1,RGCC,GREM1,PRSS3,SEMA5A,LPXN,PDGFB,EDN1,VEGFA,PLK2,ANXA1,JCAD,SCG2,DLL4,HBEGF,BMP4,CEACAM1,PROX1,EGR3,MMP9,STAT5A,TGFB2,ADTRP,ADGRB1
3.63066e-08	1.59023e-05	2.73383	positive regulation of phosphorus metabolic process	44	PTGS2,RGCC,GREM1,CEMIP,IL24,IL11,SPHK1,LIMCH1,CSPG4,PDGFB,EDN1,VEGFA,ADAM8,VAV3,FZD8,MAP2K6,CRLF1,TGFA,LEPR,NTRK2,EPHB1,INHBA,HBEGF,GPRC5B,PPARGC1A,BMP4,ROR1,IL18,ADRB2,PROX1,EPHA3,ALK,PTPRC,CSF3,RASGRP1,MMP9,NEDD9,AFAP1L2,PPP1R16B,BMP5,TGFB2,IL1B,CD74,ADTRP
6.67644e-08	2.7154e-05	122.787	positive regulation of prostaglandin biosynthetic process	5	PTGS2,ANXA1,AVPR1A,IL1B,CD74
2.14769e-07	8.15261e-05	2.88846	regulation of growth	35	CCN3,PLAC8,GREM1,SEMA5A,SPHK1,IGFBP2,RGS4,EDN1,VEGFA,MAP2,NOG,SPP1,PAPPA2,RGS2,INHBA,TFCP2L1,AKAP6,AGR2,ADRB1,ESR2,HBEGF,SFN,BMP4,CEACAM1,BST2,ADRB2,PROX1,NKD1,NEDD9,AVPR1A,S100A8,RIMS1,STAT5A,SEMA6D,TGFB2
2.64756e-07	9.422e-05	2.452	regulation of protein phosphorylation	51	PTGS2,RGCC,DEPTOR,GREM1,CEMIP,IL24,IL11,SPHK1,LIMCH1,CSPG4,PDGFB,EDN1,VEGFA,NOG,ADAM8,FZD8,MAP2K6,CRLF1,TGFA,LEPR,NTRK2,PTPN22,RGS2,INHBA,SPRY1,HBEGF,SFN,GPRC5B,BMP4,CEACAM1,ZFYVE28,PKIB,PTPRB,ITGB2,IL18,ADRB2,PYCARD,PROX1,PTPRC,CSF3,RASGRP1,MMP9,FABP4,NEDD9,AFAP1L2,LDLRAD4,BMP5,TGFB2,IL1B,CD74,ADTRP
4.88309e-07	0.000163027	2.17715	regulation of programmed cell death	59	PTGS2,PLAC8,RGCC,DEPTOR,GREM1,BMF,SEMA5A,SPHK1,ANKRD1,TGM2,IL7R,EDN1,VEGFA,IRS2,PLK2,ANXA1,CEBPB,FOXQ1,NOG,ALX4,PLEKHN1,ADAM8,ALDH1A3,MAP2K6,CRLF1,TXNIP,TGFA,SCG2,NTRK2,INHBA,G0S2,SFN,PPARGC1A,BMP4,UNC5C,CSRNP3,HMGN5,PYCARD,EGR3,ALK,PTPRC,SHH,FOXA1,MMP9,GRIA4,PDK4,S100A8,ACTN2,PTPRZ1,UNC5B,LAPTM5,HPGD,PDE3A,ACKR3,BMP5,CNR1,TGFB2,IL1B,CD74
5.15366e-07	0.000163027	11.1469	brown fat cell differentiation	9	PTGS2,PLAC8,CEBPB,RGS2,ADRB1,PPARGC1A,EBF2,ADRB2,FABP4
6.65418e-07	0.000195807	6.95172	positive regulation of cold-induced thermogenesis	12	PLAC8,VEGFA,CEBPB,LEPR,ADRB1,G0S2,PPARGC1A,EBF2,IL18,ADRB2,FABP4,ACADL
6.87765e-07	0.000195807	3.61363	response to external stimulus	102	CCN3,PTGS2,SERPINF1,SERPIND1,PLAC8,MTUS1,STRA6,GREM1,PRSS3,IL24,SEMA5A,EFNB1,SPHK1,COLEC12,IGFBP2,ANKRD1,PDGFB,IL7R,EDN1,THBD,VEGFA,ETV1,PLK2,ANXA1,CEBPB,LPL,NOG,FOXF1,SPP1,ADAM8,VAV3,PHEX,ALDH1A3,SESN3,LAMA2,CFH,GAS2L1,TXNIP,A2M,BCHE,SCG2,PTPN22,NCF2,ZNF175,EPHB1,PIEZO2,SLPI,TRAC,LHX1,ADRB1,HBEGF,PLAT,GPRC5B,PPARGC1A,BMP4,FES,CEACAM1,BST2,ANO1,CSF3R,UNC5C,ACTA2,ITGB2,CALCRL,IL18,CXCL3,ADRB2,MMP3…
7.61922e-07	0.00020659	49.1067	positive regulation of T cell differentiation in thymus	5	IL7R,ADAM8,EGR3,SHH,RASGRP1
1.63976e-06	0.000424401	2.80703	positive regulation of cellular component movement	31	PTGS2,CEMIP,SEMA5A,SPHK1,PDGFB,EDN1,VEGFA,IRS2,PLK2,MAP2,ANXA1,JCAD,FOXF1,ADAM8,ATP8A1,HBEGF,BMP4,ACTA2,TCAF2,PYCARD,PROX1,PTPRC,MMP9,NEDD9,STAT5A,ACKR3,C3AR1,SEMA6D,TGFB2,IL1B,CD74
1.82015e-06	0.000450607	2.79174	positive regulation of locomotion	31	PTGS2,CEMIP,SEMA5A,SPHK1,PDGFB,EDN1,VEGFA,IRS2,PLK2,ANXA1,JCAD,FOXF1,ADAM8,SCG2,ATP8A1,HBEGF,BMP4,ACTA2,TCAF2,PYCARD,PROX1,PTPRC,MMP9,NEDD9,STAT5A,ACKR3,C3AR1,SEMA6D,TGFB2,IL1B,CD74
2.02543e-06	0.000480534	3.26171	ameboidal-type cell migration	32	CCN3,PTGS2,SERPINF1,RGCC,GREM1,PRSS3,SEMA5A,EFNB1,LPXN,PDGFB,EDN1,VEGFA,PLK2,ANXA1,JCAD,SCG2,DLL4,ITGB4,HBEGF,BMP4,CEACAM1,ARID5B,ACTA2,PROX1,EGR3,SHH,MMP9,STAT5A,SEMA6D,TGFB2,ADTRP,ADGRB1
2.47944e-06	0.000564718	6.05086	leukocyte chemotaxis	19	CCN3,MTUS1,GREM1,PDGFB,EDN1,VEGFA,ANXA1,ADAM8,VAV3,SCG2,CSF3R,ITGB2,CXCL3,CXCR2,S100A8,C3AR1,TGFB2,IL1B,CD74
2.81741e-06	0.000598708	5.4476	regulation of cellular ketone metabolic process	13	PTGS2,IRS2,ANXA1,PPARGC1A,CEACAM1,PROX1,PDK4,AVPR1A,BMP5,CNR1,ACADL,IL1B,CD74
2.83898e-06	0.000598708	13.8086	prostanoid biosynthetic process	7	PTGS2,PLA2G4A,EDN1,ANXA1,AVPR1A,IL1B,CD74
3.04477e-06	0.000619176	4.99454	granulocyte migration	14	EDN1,ANXA1,ADAM8,VAV3,SCG2,CSF3R,ITGB2,CXCL3,CXCR2,S100A8,C3AR1,TGFB2,IL1B,CD74
3.22362e-06	0.000632941	3.61223	urogenital system development	26	SERPINF1,STRA6,GREM1,PDGFB,VEGFA,SULF2,ANXA1,NOG,FOXF1,CRLF1,PBX1,SPRY1,LHX1,BMP4,ARID5B,ACTA2,KIF26B,GPR4,LGR5,PROX1,SHH,FOXA1,MMP9,FREM2,HPGD,TGFB2
3.46824e-06	0.000638582	2.80211	positive regulation of cell migration	30	PTGS2,CEMIP,SEMA5A,SPHK1,PDGFB,EDN1,VEGFA,IRS2,PLK2,ANXA1,JCAD,FOXF1,ADAM8,ATP8A1,HBEGF,BMP4,ACTA2,TCAF2,PYCARD,PROX1,PTPRC,MMP9,NEDD9,STAT5A,ACKR3,C3AR1,SEMA6D,TGFB2,IL1B,CD74
3.47665e-06	0.000638582	2.60823	regulation of cell activation	33	PLA2G4A,ILDR2,EFNB1,SPHK1,CD70,IGFBP2,PDGFB,IL7R,THBD,IRS2,ANXA1,CEBPB,FOXF1,ADAM8,VAV3,PTPN22,INHBA,THEMIS2,BMP4,FES,CEACAM1,ACTA2,ITGB2,IL18,PYCARD,EGR3,PTPRC,SHH,RASGRP1,LAPTM5,CNR1,IL1B,CD74
4.25182e-06	0.000743162	2.3004	positive regulation of protein modification process	42	PTGS2,RGCC,GREM1,CEMIP,IL24,IL11,SPHK1,LIMCH1,CSPG4,PDGFB,EDN1,VEGFA,NNMT,ADAM8,FZD8,MAP2K6,CRLF1,TGFA,LEPR,NTRK2,PTPN22,INHBA,HBEGF,GPRC5B,PPARGC1A,BMP4,IL18,ADRB2,PROX1,PTPRC,CSF3,RASGRP1,MMP9,NEDD9,AFAP1L2,LAPTM5,PPP1R16B,BMP5,TGFB2,IL1B,CD74,ADTRP
4.35206e-06	0.000743162	2.88639	transmembrane receptor protein tyrosine kinase signaling pathway	39	APLN,GREM1,EFNB1,IGFBP2,CSPG4,PDGFB,VEGFA,IRS2,SULF2,JCAD,NOG,SESN3,SH3TC2,TXNIP,TGFA,NTRK2,EPHB1,REPS2,CYFIP2,DOK6,SPRY1,AGR2,HBEGF,PLAT,FES,CEACAM1,ARID5B,ZFYVE28,ADRB2,EPHA3,ALK,MMP9,PDK4,NEDD9,AFAP1L2,FAM83A,STAT5A,BMP5,IL1B
4.43757e-06	0.000743162	2.18401	cellular response to organic substance	98	PTGS2,SERPINF1,APLN,LTBP1,GREM1,IL24,TBC1D4,LPXN,SPHK1,COLEC12,CD70,IGFBP2,ANKRD1,TGM2,RGS4,PDGFB,IL7R,EDN1,VEGFA,IRS2,SULF2,NPR2,ANXA1,CEBPB,LPL,JCAD,NOG,FOXF1,SPP1,PHEX,SESN3,MAP2K6,GAS2L1,CRLF1,LEPR,NTRK2,PTPN22,FSTL3,PGR,DLL4,RORB,INHBA,CYFIP2,HRH2,SPRY1,AKAP6,LHX1,AGR2,ESR2,PLAT,GPR68,BMP4,FES,CEACAM1,ANO1,ARID5B,CSF3R,SCNN1A,SPINT2,CALCRL,IL18,CXCL3,CUX2,ADRB2,PYCARD,NR5A2,LGR5,GNAL,ZNF423,…
4.59628e-06	0.00074775	2.12842	regulation of biological quality	137	CCN3,TFPI2,PTGS2,SERPINF1,SERPIND1,KCNK10,PLAC8,APLN,DEPTOR,PLA2G4A,CEMIP,SEMA5A,ILDR2,IL11,TGM2,RGS4,PDGFB,JPH2,IL7R,EDN1,THBD,VEGFA,SLC6A9,IRS2,NPR2,PLK2,MAP2,ANXA1,CEBPB,LPL,KCNK6,SPP1,PLEKHN1,ATP8B1,ADAM8,VAV3,ALDH1A3,SESN3,KCNA2,LAMA2,MAP2K6,ADM2,CDH23,ARHGAP18,BCHE,NAV2,LEPR,NTRK2,SCG5,ARHGAP28,EPHB1,PIEZO2,RGS2,ATP8A1,MOXD1,INHBA,SPATA7,NALCN,CYFIP2,DISP3,SLITRK2,HRH2,ACOX2,AKAP6,GPC4,AGR2…
6.61822e-06	0.00104678	9.41014	prostaglandin metabolic process	8	PTGS2,PLA2G4A,EDN1,ANXA1,AVPR1A,HPGD,IL1B,CD74
6.85483e-06	0.0010549	4.98365	positive regulation of mononuclear cell proliferation	13	EFNB1,CD70,IGFBP2,IRS2,ANXA1,VAV3,PTPN22,IL18,PYCARD,PTPRC,SHH,IL1B,CD74
8.35162e-06	0.00125142	24.5467	regulation of unsaturated fatty acid biosynthetic process	5	PTGS2,ANXA1,AVPR1A,IL1B,CD74
9.91008e-06	0.00141513	2.4697	response to growth factor	33	APLN,LTBP1,GREM1,LPXN,SPHK1,ANKRD1,PDGFB,EDN1,VEGFA,SULF2,ANXA1,JCAD,NOG,NTRK2,FSTL3,DLL4,CYFIP2,SPRY1,LHX1,BMP4,SPINT2,ZNF423,EGR3,KCNC1,SOX6,HPGD,PDE3A,HTRA3,LDLRAD4,BMP5,TGFB2,IL1B,CHRD
9.94122e-06	0.00141513	5.75025	artery development	11	STRA6,EDN1,VEGFA,NOG,FOXF1,DLL4,BMP4,PROX1,SHH,HPGD,TGFB2
1.06061e-05	0.00147295	2.14724	cell surface receptor signaling pathway	124	CCN3,CDH6,APLN,DEPTOR,ITGBL1,LTBP1,GREM1,IL24,VIPR1,SEMA5A,EFNB1,LPXN,SPHK1,SHISA3,CD70,IGFBP2,RGS4,CSPG4,PDGFB,IL7R,EDN1,VEGFA,IRS2,SULF2,NPR2,ANXA1,LFNG,JCAD,NOG,FOXF1,VAV3,FZD8,SESN3,ADGRL3,DNER,SH3TC2,CRLF1,TXNIP,TGFA,SCG2,LEPR,NTRK2,PTPN22,FSTL3,SKAP1,EPHB1,DLL4,REPS2,PLPP4,NEURL1B,ITGB4,INHBA,HOMER3,CYFIP2,DISP3,DOK6,OSCAR,SPRY1,GPC4,AGR2,HBEGF,G0S2,THEMIS2,PLAT,GPRC5B,BMP4,FES,DKK2,CEACAM1…
1.0931e-05	0.00148193	3.7367	positive regulation of leukocyte cell-cell adhesion	17	EFNB1,CD70,IGFBP2,IL7R,ANXA1,ADAM8,PTPN22,SKAP1,ITGB2,IL18,PYCARD,EGR3,PTPRC,SHH,RASGRP1,IL1B,CD74
1.14886e-05	0.00152131	2.38309	positive regulation of cell differentiation	40	PTGS2,SERPINF1,RGCC,GREM1,SEMA5A,TGM2,IL7R,EDN1,VEGFA,ANXA1,CEBPB,LPL,ADAM8,NTRK2,INHBA,AKAP6,LHX1,SFN,GPRC5B,GPR68,BMP4,FES,CEACAM1,IL18,CUX2,PROX1,EGR3,PTPRC,CSF3,SHH,RASGRP1,FOXA1,NEDD9,PTPRZ1,SOX6,PDE3A,IFITM1,TGFB2,IL1B,CD74
1.22706e-05	0.00158793	2.11528	negative regulation of molecular function	46	TFPI2,PTGS2,SERPINF1,SERPIND1,DEPTOR,IQGAP2,PDGFB,VEGFA,SLC6A9,IRS2,MAP2,ANXA1,FRY,NOG,TXNIP,A2M,LEPR,SCG5,ARHGAP28,PTPN22,RGS2,PINLYP,SLPI,SPRY1,ESR2,SFN,COL7A1,BMP4,DKK2,CEACAM1,BST2,ZFYVE28,PKIB,SPINT2,PTPRB,TCAF2,ADRB2,PYCARD,PROX1,PTPRC,MMP9,FABP4,ACTN2,CNR1,TGFB2,IL1B
1.52684e-05	0.00180064	4.02872	regulation of cell junction assembly	15	GREM1,LIMCH1,VEGFA,NTRK2,EPHB1,SLITRK2,GPC4,SLITRK5,CUX2,EPHA3,ADGRB3,ABI3,CLSTN2,IL1B,ADGRB1
1.59922e-05	0.00180064	2.61908	positive regulation of catalytic activity	46	RGCC,GREM1,CEMIP,TBC1D4,TGM2,RGS4,PDGFB,EDN1,VEGFA,ADAM8,VAV3,FZD8,MAP2K6,TGFA,NTRK2,EPHB1,CYFIP2,ADRB1,PARM1,HBEGF,GPRC5B,PKIB,RAPGEF4,ROR1,ITGB2,IL18,ADRB2,PYCARD,LGR5,PROX1,EPHA3,ALK,PTPRC,RASGRP1,RASGRF1,NEDD9,GRHL3,AVPR1A,S100A8,AFAP1L2,LAPTM5,RGS7,LPAR1,TGFB2,IL1B,CD74
1.60751e-05	0.00180064	2.79581	tissue development	92	CCN3,PTGS2,KRT8,MEST,STRA6,RGCC,GREM1,SEMA5A,EFNB1,ANKRD1,TGM2,RGS4,PDGFB,JPH2,EDN1,VEGFA,SULF2,NTN4,ANXA1,CEBPB,FOXQ1,LFNG,NOG,FOXF1,SPP1,KRT75,ALX4,PHEX,ALDH1A3,LAMA2,DNER,CRLF1,TXNIP,CDH23,PGR,EPHB1,DLL4,COBL,RGS2,ITGB4,INHBA,TFCP2L1,PBX1,PGM5,SPRY1,AKAP6,LHX1,GPC4,AGR2,HBEGF,SFN,PPARGC1A,COL7A1,BMP4,CEACAM1,ARID5B,EBF2,UNC5C,SPINT2,ROR1,ACTA2,ITGB2,KIF26B,ADRB2,NR5A2,GPR4,LGR5,PROX1,EPHA3,PTP…
1.61896e-05	0.00180064	4.25925	monocarboxylic acid biosynthetic process	17	PTGS2,PLA2G4A,FADS2,EDN1,ANXA1,LPL,ALDH1A3,CEACAM1,ALOXE3,SLC27A2,PROX1,PDK4,AVPR1A,CYP39A1,ACADL,IL1B,CD74
1.6215e-05	0.00180064	10.1484	regulation of neuroinflammatory response	7	PTGS2,SPHK1,IL18,MMP3,PTPRC,MMP9,IL1B
1.64273e-05	0.00180064	2.56413	positive regulation of cell death	29	PTGS2,RGCC,BMF,ANKRD1,TGM2,HBA1,ANXA1,PLEKHN1,ADAM8,ALDH1A3,MAP2K6,TXNIP,INHBA,ACOX2,G0S2,BMP4,UNC5C,CSRNP3,ITGB2,MMP3,PYCARD,PTPRC,FOXA1,MMP9,S100A8,LAPTM5,HPGD,CNR1,TGFB2
1.64357e-05	0.00180064	4.5595	adenylate cyclase-activating G protein-coupled receptor signaling pathway	13	ADGRL3,ADM2,ADRB1,RAPGEF4,CALCRL,ADRB2,GPR4,LGR5,GNAL,ADGRB3,LPAR1,CNR1,ADGRB1
1.64442e-05	0.00180064	2.33942	export from cell	41	CCN3,RGCC,PLA2G4A,ILDR2,IL11,ANKRD1,EDN1,IRS2,ANXA1,FOXF1,SPP1,ADAM8,TNFAIP2,KCNA2,MAP2K6,ABCG2,SCG2,NTRK2,SCG5,SLC17A9,INHBA,ANK1,SLC47A1,SYT12,GPR68,FES,CEACAM1,ANO1,RAPGEF4,LIN7A,ITGB2,RAB3C,RASGRP1,AVPR1A,RIMS1,STXBP6,SNAP25,CNR1,TGFB2,IL1B,ADTRP
1.85271e-05	0.00199044	1.76207	response to chemical	147	CCN3,PTGS2,SERPINF1,SERPIND1,MTUS1,APLN,STRA6,RGCC,LTBP1,GREM1,PLA2G4A,IL24,TBC1D4,SEMA5A,ILDR2,EFNB1,LPXN,SPHK1,COLEC12,CD70,IGFBP2,ANKRD1,TGM2,RGS4,HBA1,PDGFB,IL7R,EDN1,THBD,VEGFA,IRS2,SULF2,NPR2,ETV1,ANXA1,CEBPB,NNMT,LPL,JCAD,NOG,FOXF1,SPP1,ADAM8,VAV3,PHEX,SESN3,LAMA2,MAP2K6,ABCG2,GAS2L1,CRLF1,TXNIP,TGFA,A2M,BCHE,SCG2,LEPR,NTRK2,PTPN22,FSTL3,PGR,EPHB1,DLL4,RORB,RGS2,INHBA,SLPI,CYFIP2,SLC47A1,H…
2.17021e-05	0.0022488	2.40259	cell morphogenesis involved in differentiation	32	SEMA5A,EFNB1,LPXN,EDN1,VEGFA,ETV1,MAP2,NTN4,NOG,SPP1,LAMA2,CDH23,NTRK2,EPHB1,COBL,SLITRK2,LHX1,UNC5C,SPINT2,SLITRK5,CUX2,PROX1,EPHA3,SHH,ADGRB3,ABI3,NEDD9,PTPRZ1,UNC5B,CDH11,SEMA6D,ADGRB1
2.22036e-05	0.0022488	5.82989	mesonephric tubule development	10	GREM1,VEGFA,NOG,CRLF1,PBX1,SPRY1,LHX1,BMP4,KIF26B,SHH
2.2496e-05	0.0022488	3.68724	muscle cell proliferation	16	CCN3,PTGS2,APLN,PDGFB,EDN1,NOG,EPHB1,HBEGF,PPARGC1A,BMP4,CALCRL,IL18,SHH,MMP9,HPGD,TGFB2
2.25117e-05	0.0022488	2.111	system development	170	CCN3,PTGS2,SERPINF1,APLN,STRA6,RGCC,GREM1,SEMA5A,EFNB1,IL11,SPHK1,ANKRD1,TGM2,NCAM2,RGS4,CSPG4,PDGFB,JPH2,IL7R,EDN1,VEGFA,IRS2,SULF2,NPR2,ETV1,PLK2,MAP2,NTN4,ANXA1,FRY,CEBPB,LFNG,JCAD,NOG,FOXF1,SPP1,KRT75,ALX4,ATP8B1,ADAM8,VAV3,TNFAIP2,FZD8,PHEX,ALDH1A3,KCNA2,LAMA2,ADGRL3,DNER,SH3TC2,MAP2K6,ADM2,CRLF1,TGFA,A2M,CDH23,BCHE,NAV2,SCG2,LEPR,NTRK2,GPRIN3,PTPN22,FSTL3,PCDH18,PGR,EPHB1,DLL4,COBL,RORB,PAP…
2.47061e-05	0.00242546	3.01128	regulation of protein serine/threonine kinase activity	21	RGCC,CEMIP,PDGFB,EDN1,VEGFA,ADAM8,FZD8,MAP2K6,TGFA,PTPN22,RGS2,SPRY1,SFN,BMP4,PKIB,ADRB2,PYCARD,PROX1,PTPRC,RASGRP1,IL1B
3.02514e-05	0.00291951	17.5295	prostaglandin transport	5	PLA2G4A,EDN1,MAP2K6,SLCO2A1,IL1B
3.13337e-05	0.00297357	32.6489	pharyngeal arch artery morphogenesis	4	EDN1,NOG,BMP4,TGFB2
3.1871e-05	0.00297497	5.56666	mesonephros development	10	GREM1,VEGFA,NOG,CRLF1,PBX1,SPRY1,LHX1,BMP4,KIF26B,SHH
3.50923e-05	0.00317878	1.91281	cell projection organization	54	SERPINF1,SEMA5A,EFNB1,NCAM2,CSPG4,EDN1,VEGFA,ETV1,MAP2,FRY,NOG,SPP1,ATP8B1,VAV3,LAMA2,CDH23,NTRK2,GPRIN3,EPHB1,COBL,RGS2,ITGB4,TENM2,CYFIP2,SLITRK2,LHX1,C15orf62,FES,GLDN,UNC5C,ROR1,SLITRK5,CUX2,EPHA3,ALK,SHH,ADGRB3,DGKG,ABI3,RASGRF1,ACTN2,PTPRZ1,UNC5B,RIMS1,SCARF1,TSPAN2,SNAP25,PPP1R16B,CDH11,LPAR1,SEMA6D,BMP5,CNR1,ADGRB1
3.51709e-05	0.00317878	2.19456	hematopoietic or lymphoid organ development	37	IL11,IL7R,VEGFA,ANXA1,CEBPB,LFNG,KRT75,ADAM8,FZD8,LEPR,PTPN22,FSTL3,DLL4,INHBA,PBX1,HOXB8,OSCAR,ZNF160,GPR68,BMP4,FES,CEACAM1,CSF3R,IL18,EGR3,PTPRC,CSF3,SHH,RASGRP1,MMP9,PTPRZ1,TSPAN2,ALAS2,MAFB,TGFB2,IL1B,CD74
3.76352e-05	0.00332747	4.91709	camera-type eye morphogenesis	11	STRA6,VEGFA,ALDH1A3,NTRK2,EPHB1,RORB,LHX1,BMP4,PROX1,SDK2,COL8A2
3.79848e-05	0.00332747	7.18084	positive regulation of synapse assembly	8	NTRK2,EPHB1,SLITRK2,SLITRK5,CUX2,ADGRB3,CLSTN2,ADGRB1
3.95409e-05	0.0034113	4.48357	positive regulation of inflammatory response	12	PTGS2,CEBPB,LPL,ADAM8,GPRC5B,IL18,PYCARD,GPR4,FABP4,S100A8,CNR1,IL1B
4.09951e-05	0.00348397	1.71013	negative regulation of cellular process	155	CCN3,TFPI2,PTGS2,SERPINF1,SERPIND1,PLAC8,APLN,SPOCD1,RGCC,DEPTOR,LTBP1,GREM1,BMF,CEMIP,IL24,TBC1D4,SEMA5A,ILDR2,IL11,LPXN,SPHK1,SHISA3,IGFBP2,ANKRD1,RGS4,LIMCH1,PDGFB,JPH2,IL7R,EDN1,THBD,VEGFA,RTN1,SLC6A9,IRS2,SULF2,NPR2,PLK2,MAP2,ANXA1,FRY,CEBPB,FOXQ1,LFNG,LPL,NOG,FOXF1,SPP1,PLEKHN1,ATP8B1,ADAM8,SESN3,CRLF1,TXNIP,TGFA,A2M,BCHE,SCG2,LEPR,NTRK2,ARHGAP28,PTPN22,TP53I11,FSTL3,ZNF175,EPHB1,DLL4,RORB,…
4.3264e-05	0.00362273	4.43837	adaptive thermogenesis	14	PLAC8,VEGFA,CEBPB,MAP2K6,LEPR,ADRB1,G0S2,PPARGC1A,EBF2,IL18,ADRB2,ZNF423,FABP4,ACADL
4.41364e-05	0.00364222	2.1027	negative regulation of cell death	40	CCN3,PTGS2,SERPINF1,PLAC8,GREM1,SEMA5A,SPHK1,IL7R,EDN1,VEGFA,IRS2,PLK2,ANXA1,CEBPB,FOXQ1,NOG,ADAM8,CRLF1,TGFA,SCG2,NTRK2,AGR2,SFN,PPARGC1A,BMP4,HMGN5,EGR3,CSF3,SHH,MMP9,GRIA4,PDK4,PTPRZ1,UNC5B,LAPTM5,PDE3A,ACKR3,BMP5,IL1B,CD74
5.11109e-05	0.0041575	5.90621	regulation of animal organ morphogenesis	13	GREM1,EDN1,VEGFA,NTN4,NOG,SPRY1,LHX1,GPC4,BMP4,ROR1,SHH,NKD1,GRHL3
5.6746e-05	0.00453423	2.24643	neuron projection development	45	SERPINF1,SEMA5A,EFNB1,NCAM2,EDN1,VEGFA,ETV1,MAP2,FRY,NOG,SPP1,LAMA2,CDH23,NTRK2,GPRIN3,EPHB1,COBL,RGS2,CYFIP2,SLITRK2,LHX1,FES,UNC5C,ROR1,SLITRK5,CUX2,EPHA3,ALK,SHH,ADGRB3,DGKG,ABI3,RASGRF1,PTPRZ1,UNC5B,RIMS1,SCARF1,TSPAN2,SNAP25,CDH11,LPAR1,SEMA6D,BMP5,CNR1,ADGRB1
5.73348e-05	0.00453423	3.2457	carboxylic acid transport	17	PLA2G4A,RGS4,EDN1,SLC6A9,ANXA1,ATP8B1,MAP2K6,ABCG2,NTRK2,SLC16A6,RGS2,SLC47A1,ABCC3,CEACAM1,SLCO2A1,AVPR1A,IL1B
6.08147e-05	0.00470825	2.14023	locomotion	86	CCN3,PTGS2,SERPINF1,SERPIND1,MTUS1,RGCC,ITGBL1,GREM1,CEMIP,PRSS3,IL24,SEMA5A,EFNB1,LPXN,SPHK1,LIMCH1,CSPG4,PDGFB,EDN1,VEGFA,IRS2,ETV1,PLK2,NTN4,ANXA1,JCAD,NOG,FOXF1,ADAM8,VAV3,LAMA2,ADGRL3,DNER,ARHGAP18,SCG2,NTRK2,EPHB1,DLL4,ATP8A1,ITGB4,DACH1,LHX1,GPC4,HBEGF,PLAT,BMP4,FES,CEACAM1,BST2,ARID5B,CSF3R,UNC5C,SPINT2,ACTA2,ITGB2,TCAF2,CXCL3,PYCARD,TSPAN11,PROX1,EGR3,EPHA3,PTPRC,SHH,MMP9,ABI3,NEDD9,CXCR…
6.11891e-05	0.00470825	2.81482	negative regulation of locomotion	21	CCN3,SERPINF1,RGCC,GREM1,IL24,SEMA5A,LIMCH1,NOG,DLL4,DACH1,BST2,SPINT2,SHH,IFITM1,LDLRAD4,SEMA6D,BMP5,CD74,ADTRP,CHRD,ADGRB1
6.77571e-05	0.00514412	2.87663	negative regulation of cellular component movement	20	CCN3,SERPINF1,RGCC,GREM1,IL24,LIMCH1,NOG,DLL4,DACH1,BST2,SPINT2,SHH,IFITM1,LDLRAD4,SEMA6D,BMP5,CD74,ADTRP,CHRD,ADGRB1
7.77572e-05	0.00582565	2.5695	regulation of multicellular organismal development	62	SERPINF1,RGCC,GREM1,SEMA5A,SPHK1,TGM2,RGS4,IL7R,EDN1,VEGFA,PLK2,MAP2,ANXA1,CEBPB,JCAD,NOG,SPP1,ADAM8,LAMA2,ADM2,NTRK2,FSTL3,EPHB1,DLL4,RGS2,INHBA,HOXB8,SLITRK2,SPRY1,AKAP6,LHX1,SFN,GPR68,BMP4,FES,CEACAM1,CSF3R,SLITRK5,IL18,CUX2,ADRB2,GPR4,PROX1,EGR3,PTPRC,CSF3,SHH,RASGRP1,MMP9,ADGRB3,PTPRZ1,SOX6,CLSTN2,PPP1R16B,MAFB,C3AR1,SEMA6D,TGFB2,IL1B,CD74,CNMD,ADGRB1
7.94972e-05	0.00587867	73.2812	ductus arteriosus closure	3	STRA6,FOXF1,HPGD
8.19013e-05	0.0059788	13.6311	positive regulation of fatty acid biosynthetic process	5	PTGS2,ANXA1,AVPR1A,IL1B,CD74
8.6457e-05	0.00623147	2.91212	negative regulation of cell migration	19	CCN3,SERPINF1,RGCC,GREM1,IL24,LIMCH1,NOG,DLL4,DACH1,BST2,SHH,IFITM1,LDLRAD4,SEMA6D,BMP5,CD74,ADTRP,CHRD,ADGRB1
8.76832e-05	0.00624085	2.64343	positive regulation of biological process	202	CCN3,PTGS2,SERPINF1,PLAC8,APLN,STRA6,RGCC,GREM1,PLA2G4A,BMF,CEMIP,IL24,VIPR1,SEMA5A,EFNB1,IL11,LPXN,EDIL3,SPHK1,COLEC12,CD70,IGFBP2,ANKRD1,TGM2,RGS4,HBA1,LIMCH1,CSPG4,PDGFB,JPH2,IL7R,EDN1,THBD,VEGFA,SLC6A9,IRS2,SULF2,NPR2,ETV1,PLK2,MAP2,ANXA1,CEBPB,LMO7,LFNG,NNMT,LPL,JCAD,NOG,FOXF1,SPP1,ALX4,PLEKHN1,ADAM8,VAV3,LURAP1L,FZD8,ALDH1A3,SESN3,LAMA2,MAP2K6,CFH,ADM2,CRLF1,SSBP2,TXNIP,TGFA,A2M,SCG2,LEPR,N…
9.02258e-05	0.00634254	3.00331	organic acid biosynthetic process	18	PTGS2,PLA2G4A,FADS2,EDN1,ANXA1,LPL,ALDH1A3,CEACAM1,ALOXE3,SLC27A2,PROX1,PDK4,GGT5,AVPR1A,CYP39A1,ACADL,IL1B,CD74
9.16171e-05	0.0063618	2.48516	regulation of response to external stimulus	43	CCN3,PTGS2,SERPINF1,MTUS1,GREM1,SEMA5A,SPHK1,PDGFB,EDN1,THBD,VEGFA,PLK2,ANXA1,CEBPB,LPL,FOXF1,SPP1,ADAM8,CFH,A2M,SCG2,PTPN22,PLAT,GPRC5B,CEACAM1,CALCRL,IL18,MMP3,PYCARD,GPR4,PTPRC,RASGRP1,MMP9,FABP4,S100A8,SCARF1,C3AR1,ACP5,SEMA6D,CNR1,IL1B,CD74,ADTRP
9.71065e-05	0.0065603	4.05125	temperature homeostasis	17	PTGS2,PLAC8,VEGFA,CEBPB,MAP2K6,LEPR,ADRB1,G0S2,PPARGC1A,EBF2,IL18,ADRB2,ZNF423,FABP4,CNR1,ACADL,IL1B
9.76244e-05	0.0065603	2.79496	eye development	20	SERPINF1,STRA6,VEGFA,ALDH1A3,NTRK2,EPHB1,DLL4,RORB,INHBA,PBX1,SPRY1,LHX1,BMP4,PROX1,SDK2,SHH,COL8A2,GRHL3,FREM2,TGFB2
9.89366e-05	0.0065603	4.80635	receptor internalization	10	APLN,GREM1,VEGFA,CEACAM1,ITGB2,CALCRL,CXCR2,CACNG4,SNAP25,ACKR3
0.000100244	0.0065603	6.16801	nephron tubule morphogenesis	8	GREM1,VEGFA,NOG,PBX1,LHX1,BMP4,KIF26B,SHH
0.000100564	0.0065603	2.64011	negative regulation of phosphorus metabolic process	22	DEPTOR,GREM1,PDGFB,IRS2,NOG,PTPN22,RGS2,INHBA,SPRY1,SFN,BMP4,CEACAM1,ZFYVE28,PKIB,PTPRB,PYCARD,PTPRC,FABP4,PPP1R16B,LDLRAD4,TGFB2,IL1B
0.000101389	0.0065603	2.33434	plasma membrane bounded cell projection morphogenesis	28	SEMA5A,EFNB1,EDN1,VEGFA,ETV1,MAP2,NOG,SPP1,LAMA2,NTRK2,EPHB1,COBL,CYFIP2,SLITRK2,LHX1,UNC5C,SLITRK5,CUX2,EPHA3,SHH,ADGRB3,ABI3,PTPRZ1,UNC5B,RIMS1,CDH11,SEMA6D,ADGRB1
0.000112663	0.00717186	1.65274	signaling	202	CCN3,PTGS2,KCNK10,CDH6,APLN,DEPTOR,ITGBL1,LTBP1,GREM1,PLA2G4A,BMF,IL24,VIPR1,SEMA5A,ILDR2,EFNB1,IL11,LPXN,SPHK1,SHISA3,IQGAP2,COLEC12,CD70,IGFBP2,ANKRD1,TGM2,RGS4,CSPG4,PDGFB,IL7R,EDN1,VEGFA,SLC6A9,IRS2,SULF2,NPR2,PLK2,NTN4,ANXA1,CEBPB,LMO7,LFNG,LPL,JCAD,NOG,FOXF1,SPP1,ADAM8,VAV3,LURAP1L,FZD8,PHEX,SESN3,KCNA2,LAMA2,ADGRL3,DNER,SH3TC2,MAP2K6,ADM2,CRLF1,TXNIP,TGFA,ARHGAP18,BCHE,SCG2,LEPR,NTRK2,SCG5…
0.000113795	0.00717186	2.24813	positive regulation of cellular component organization	47	SERPINF1,APLN,RGCC,GREM1,BMF,SEMA5A,SPHK1,LIMCH1,PDGFB,EDN1,VEGFA,ANXA1,TGFA,NTRK2,SKAP1,EPHB1,COBL,RGS2,ATP8A1,TENM2,SLITRK2,C15orf62,PPARGC1A,FES,PKIB,ROR1,SLITRK5,CUX2,MMP1,ADRB2,MMP3,PYCARD,PROX1,EPHA3,ALK,CSF3,MMP9,ADGRB3,ACTN2,SCARF1,CLSTN2,LPAR1,BMP5,CNR1,TGFB2,IL1B,ADGRB1
0.000114619	0.00717186	4.71429	unsaturated fatty acid metabolic process	10	PTGS2,PLA2G4A,FADS2,EDN1,ANXA1,ALOXE3,AVPR1A,HPGD,IL1B,CD74
0.000115978	0.00717801	3.5024	negative regulation of protein kinase activity	14	DEPTOR,PTPN22,RGS2,SPRY1,SFN,BMP4,CEACAM1,ZFYVE28,PKIB,PTPRB,PYCARD,PTPRC,FABP4,IL1B
0.000117925	0.00722007	1.6473	cell communication	203	CCN3,PTGS2,KCNK10,CDH6,APLN,DEPTOR,ITGBL1,LTBP1,GREM1,PLA2G4A,BMF,IL24,VIPR1,SEMA5A,ILDR2,EFNB1,IL11,LPXN,SPHK1,SHISA3,IQGAP2,COLEC12,CD70,IGFBP2,ANKRD1,TGM2,RGS4,CSPG4,PDGFB,IL7R,EDN1,VEGFA,SLC6A9,IRS2,SULF2,NPR2,PLK2,NTN4,ANXA1,CEBPB,LFNG,LPL,JCAD,NOG,FOXF1,SPP1,ADAM8,VAV3,LURAP1L,FZD8,PHEX,SESN3,KCNA2,LAMA2,ADGRL3,DNER,SH3TC2,MAP2K6,ADM2,GAS2L1,CRLF1,TXNIP,TGFA,ARHGAP18,BCHE,SCG2,LEPR,NTRK2,SC…
0.000120002	0.00723294	5.23276	renal tubule development	9	GREM1,VEGFA,NOG,PBX1,LHX1,BMP4,KIF26B,LGR5,SHH
0.000121316	0.00723294	2.11908	animal organ development	142	CCN3,PTGS2,SERPINF1,KRT8,APLN,STRA6,RGCC,GREM1,SEMA5A,ILDR2,EFNB1,IL11,SPHK1,ANKRD1,TGM2,RGS4,PDGFB,JPH2,IL7R,EDN1,VEGFA,IRS2,SULF2,NPR2,ETV1,NTN4,ANXA1,SMTN,CEBPB,FOXQ1,LFNG,NNMT,NOG,FOXF1,SPP1,KRT75,ALX4,ATP8B1,ADAM8,FZD8,PHEX,ALDH1A3,LAMA2,ADGRL3,DNER,MAP2K6,CRLF1,TXNIP,TGFA,A2M,CDH23,LEPR,NTRK2,PTPN22,FSTL3,PCDH18,PGR,EPHB1,DLL4,COBL,RORB,PAPPA2,RGS2,ITGB4,INHBA,TFCP2L1,PBX1,HOXB8,OSCAR,SPRY1…
0.000122825	0.00723294	3.9441	cardiac muscle tissue development	18	GREM1,ANKRD1,RGS4,JPH2,EDN1,VEGFA,NOG,DLL4,RGS2,AKAP6,BMP4,PROX1,ACTN2,SOX6,XIRP2,ASB2,BMP5,TGFB2
0.000123217	0.00723294	4.66956	positive regulation of MAP kinase activity	10	PDGFB,EDN1,VEGFA,ADAM8,FZD8,MAP2K6,TGFA,PTPRC,RASGRP1,IL1B
0.000129727	0.0075374	3.66829	multi-organism reproductive process	15	PTGS2,IGFBP2,EDN1,THBD,VEGFA,SPP1,PGR,RGS2,ITGB4,PAPPA,MMP9,AVPR1A,HPGD,CNR1,IL1B
0.000138618	0.00793359	2.71771	sensory system development	20	SERPINF1,STRA6,VEGFA,ALDH1A3,NTRK2,EPHB1,DLL4,RORB,INHBA,PBX1,SPRY1,LHX1,BMP4,PROX1,SDK2,SHH,COL8A2,GRHL3,FREM2,TGFB2
0.000140067	0.00793359	19.5851	positive regulation of prostaglandin secretion	4	PLA2G4A,EDN1,MAP2K6,IL1B
0.000140726	0.00793359	8.67537	negative regulation of epithelial to mesenchymal transition	6	NOG,SPRY1,FOXA1,LDLRAD4,BMP5,TGFB2
0.000142422	0.00795049	2.28372	regulation of defense response	28	CCN3,PTGS2,SERPINF1,SPHK1,PLK2,ANXA1,CEBPB,LPL,FOXF1,ADAM8,CFH,A2M,PTPN22,GPRC5B,CEACAM1,CALCRL,IL18,MMP3,PYCARD,GPR4,PTPRC,RASGRP1,MMP9,FABP4,S100A8,ACP5,CNR1,IL1B
0.000150542	0.00832222	3.60971	inner ear development	13	ATP8B1,ALDH1A3,CDH23,BMP4,LIN7A,ROR1,LGR5,PROX1,SHH,GRHL3,FREM2,MAFB,TGFB2
0.00015431	0.00843268	3.84257	negative regulation of secretion	12	CCN3,IL11,EDN1,ANXA1,FOXF1,INHBA,CEACAM1,STXBP6,CNR1,IL1B,CD74,ADTRP
0.000155502	0.00843268	1.794	positive regulation of nucleic acid-templated transcription	54	PLAC8,APLN,RGCC,GREM1,IL11,ANKRD1,PDGFB,EDN1,VEGFA,ETV1,CEBPB,LMO7,NOG,FOXF1,SPP1,ALX4,SSBP2,FSTL3,SKAP1,PGR,ZNF175,RORB,INHBA,TFCP2L1,PBX1,ZNF845,LHX1,ESR2,PPARGC1A,BMP4,ARID5B,EBF2,CSRNP3,HMGN5,IL18,ADRB2,NR5A2,PROX1,ZNF423,EGR3,CSF3,SHH,FOXA1,LMO2,DMRT2,HOXB5,GRHL3,ACTN2,AFAP1L2,MAFB,BMP5,TGFB2,IL1B,CD74
0.000167031	0.00897241	1.50967	establishment of localization	125	CCN3,PTGS2,KCNK10,APLN,STRA6,RGCC,GREM1,PLA2G4A,CEMIP,TBC1D4,ILDR2,IL11,SPHK1,COLEC12,ANKRD1,TGM2,RGS4,HBA1,DYSF,PDGFB,JPH2,EDN1,VEGFA,SLC6A9,IRS2,MAP2,ANXA1,CEBPB,TINAGL1,KCNK6,FOXF1,SPP1,ATP8B1,ADAM8,VAV3,TNFAIP2,KCNA2,DNER,SH3TC2,MAP2K6,ABCG2,TXNIP,CDH23,SCG2,LEPR,NTRK2,SCG5,NCF2,SLC16A6,PIEZO2,REPS2,RGS2,ATP8A1,PLPP4,NEURL1B,SLC17A9,INHBA,HOMER3,ANK1,NALCN,SLC47A1,DISP3,ABCC3,HRH2,SPRY1,AKAP6…
0.000173846	0.00925122	3.06085	cell morphogenesis	48	CDH6,GREM1,SEMA5A,EFNB1,LPXN,IL7R,EDN1,VEGFA,ETV1,MAP2,NTN4,ANXA1,FRY,NOG,SPP1,ADAM8,LAMA2,CDH23,ARHGAP18,NTRK2,EPHB1,COBL,TFCP2L1,CYFIP2,SLITRK2,LHX1,C15orf62,FES,UNC5C,SPINT2,ITGB2,SLITRK5,CUX2,PROX1,EPHA3,SHH,ADGRB3,ABI3,NEDD9,PTPRZ1,UNC5B,RIMS1,PALMD,CDH11,LPAR1,SEMA6D,TGFB2,ADGRB1
0.000183495	0.00960458	2.24621	cell part morphogenesis	28	SEMA5A,EFNB1,EDN1,VEGFA,ETV1,MAP2,NOG,SPP1,LAMA2,NTRK2,EPHB1,COBL,CYFIP2,SLITRK2,LHX1,UNC5C,SLITRK5,CUX2,EPHA3,SHH,ADGRB3,ABI3,PTPRZ1,UNC5B,RIMS1,CDH11,SEMA6D,ADGRB1
0.00018386	0.00960458	11.1503	positive regulation of heart rate	5	RGS4,EDN1,ADM2,ADRB1,AVPR1A
0.000186749	0.00966682	3.17454	muscle organ development	22	STRA6,ANKRD1,JPH2,ETV1,SMTN,NOG,ALX4,LAMA2,DNER,EPHB1,DLL4,HBEGF,BMP4,ARID5B,PROX1,EGR3,SHH,SOX6,XIRP2,ASB2,TGFB2,ADGRB1
0.000193293	0.00991543	5.55778	regulation of ERBB signaling pathway	8	SH3TC2,TGFA,AGR2,HBEGF,CEACAM1,ZFYVE28,MMP9,AFAP1L2
0.000195388	0.00993337	3.50812	multi-multicellular organism process	15	PTGS2,IGFBP2,EDN1,THBD,VEGFA,SPP1,PGR,RGS2,ITGB4,PAPPA,MMP9,AVPR1A,HPGD,CNR1,IL1B
0.00019764	0.00995894	2.27348	negative regulation of developmental process	48	CCN3,SERPINF1,PLAC8,RGCC,GREM1,SEMA5A,RGS4,PDGFB,VEGFA,NPR2,PLK2,MAP2,ANXA1,NOG,SPP1,FSTL3,EPHB1,RORB,RGS2,INHBA,DISP3,PBX1,HOXB8,SPRY1,ADRB1,GPR68,BMP4,CEACAM1,IL18,ADRB2,GPR4,SHH,FOXA1,MMP9,NKD1,ADGRB3,MBNL3,SOX6,MAFB,LDLRAD4,SEMA6D,BMP5,TGFB2,IL1B,CD74,CHRD,CNMD,ADGRB1
0.000207383	0.0103136	5.49506	cardiac muscle cell development	9	RGS4,EDN1,VEGFA,RGS2,AKAP6,BMP4,PROX1,ACTN2,ASB2
0.000208301	0.0103136	2.39159	positive regulation of apoptotic process	24	PTGS2,RGCC,BMF,ANKRD1,TGM2,ANXA1,PLEKHN1,ADAM8,ALDH1A3,MAP2K6,TXNIP,INHBA,G0S2,BMP4,UNC5C,CSRNP3,PYCARD,PTPRC,FOXA1,MMP9,S100A8,HPGD,CNR1,TGFB2
0.0002124	0.0104259	7.97066	lipid export from cell	6	PLA2G4A,EDN1,SPP1,MAP2K6,INHBA,IL1B
0.000218766	0.0106466	1.72574	positive regulation of macromolecule biosynthetic process	59	PLAC8,APLN,RGCC,GREM1,IL11,ANKRD1,PDGFB,EDN1,VEGFA,SLC6A9,IRS2,ETV1,CEBPB,LMO7,NOG,FOXF1,SPP1,ALX4,MAP2K6,SSBP2,FSTL3,SKAP1,PGR,ZNF175,RORB,INHBA,TFCP2L1,PBX1,ZNF845,LHX1,ESR2,PARM1,PPARGC1A,BMP4,ARID5B,PKIB,EBF2,CSRNP3,HMGN5,IL18,ADRB2,NR5A2,PROX1,ZNF423,EGR3,CSF3,SHH,FOXA1,LMO2,DMRT2,HOXB5,GRHL3,ACTN2,AFAP1L2,MAFB,BMP5,TGFB2,IL1B,CD74
0.000230113	0.0110106	5.40492	nerve development	8	EDN1,SULF2,ATP8B1,KCNA2,NAV2,EPHB1,ACKR3,MAFB
0.000230113	0.0110106	5.40492	pancreas development	8	ILDR2,ANXA1,FOXF1,BMP4,NR5A2,PROX1,SHH,BMP5
0.000232733	0.0110432	2.53787	reproductive system development	21	PTGS2,SERPINF1,STRA6,PDGFB,VEGFA,ANXA1,CEBPB,LFNG,NOG,SPP1,A2M,PGR,INHBA,LHX1,BMP4,ARID5B,SPINT2,SHH,FOXA1,BMP5,TGFB2
0.000239562	0.0112733	5.36878	neutrophil chemotaxis	11	EDN1,VAV3,CSF3R,ITGB2,CXCL3,CXCR2,S100A8,C3AR1,TGFB2,IL1B,CD74
0.000241794	0.0112851	7.76048	positive regulation of mitotic nuclear division	6	RGCC,SPHK1,PDGFB,EDN1,TGFA,IL1B
0.000246636	0.0113254	16.3191	negative regulation of smooth muscle contraction	4	PTGS2,RGS2,CALCRL,ADRB2
0.000246636	0.0113254	16.3191	glomerular mesangium development	4	PDGFB,BMP4,ACTA2,GPR4
0.000252315	0.0114935	2.08236	actin filament-based process	32	RGCC,SEMA5A,IQGAP2,ANKRD1,RGS4,LIMCH1,EDN1,ANXA1,SMTN,GAS2L1,ARHGAP18,ARHGAP28,COBL,CYFIP2,PGM5,C15orf62,FES,BST2,ACTA2,THSD7A,DIAPH2,PYCARD,PROX1,EPHA3,CSF3,ABI3,NEDD9,GRHL3,ACTN2,XIRP2,LPAR1,ASB2
0.000259708	0.0116946	4.228	embryonic skeletal system development	10	SULF2,NOG,ALX4,PBX1,HOXB8,LHX1,BMP4,SHH,DMRT2,HOXB5
0.000260838	0.0116946	2.94376	amide transport	16	CCN3,ILDR2,EDN1,IRS2,ANXA1,ABCG2,SLC47A1,GPR68,ANO1,SLC14A1,RAPGEF4,S100A8,SNAP25,CNR1,IL1B,CD74
0.000265144	0.0117947	3.60771	phosphatidylinositol-mediated signaling	12	PDGFB,EDN1,NTRK2,CEACAM1,ROR1,IL18,CSF3,RASGRP1,CA8,UNC5B,PPP1R16B,TGFB2
0.000269953	0.0119156	36.6366	positive regulation of fever generation	3	PTGS2,CNR1,IL1B
0.000281639	0.0123358	3.19383	morphogenesis of an epithelium	32	GREM1,TGM2,EDN1,VEGFA,NTN4,FOXQ1,NOG,FOXF1,ALDH1A3,PGR,DLL4,COBL,PBX1,SPRY1,LHX1,GPC4,HBEGF,BMP4,CEACAM1,SPINT2,ROR1,KIF26B,LGR5,PROX1,SHH,FOXA1,NKD1,GRHL3,FREM2,ASB2,BMP5,TGFB2
0.000292927	0.0126551	2.29325	cell-cell signaling	71	CCN3,PTGS2,GREM1,PLA2G4A,SEMA5A,ILDR2,EFNB1,IL11,SHISA3,CD70,IGFBP2,RGS4,PDGFB,EDN1,IRS2,SULF2,PLK2,ANXA1,NOG,SPP1,FZD8,PHEX,KCNA2,LAMA2,MAP2K6,BCHE,NTRK2,SCG5,PGR,EPHB1,INHBA,HRH2,LHX1,GPC4,ESR2,SYT12,PLAT,GPRC5B,GPR68,BMP4,DKK2,ANO1,RAPGEF4,LIN7A,ROR1,ITGB2,APCDD1L,IL18,CALB2,CUX2,ADRB2,LGR5,EGR3,SHH,FOXA1,NKD1,PTCHD1,CHRM3,RASGRF1,GRHL3,S100A8,RIMS1,CXXC4,WNK2,CACNG4,SNAP25,CLSTN2,CDH11,CNR1,I…
0.000293374	0.0126551	2.04105	negative regulation of multicellular organismal process	53	CCN3,PTGS2,SERPINF1,PLAC8,RGCC,GREM1,SEMA5A,RGS4,PDGFB,EDN1,THBD,PLK2,MAP2,ANXA1,NOG,SPP1,MAP2K6,PTPN22,FSTL3,DLL4,RGS2,INHBA,HOMER3,SPRY1,ADRB1,PLAT,GPR68,BMP4,CEACAM1,BST2,CALCRL,ADRB2,PYCARD,GPR4,ZNF423,PTPRC,SHH,FOXA1,ADGRB3,AVPR1A,LAPTM5,SOX6,MAFB,LDLRAD4,ACP5,SEMA6D,BMP5,TGFB2,IL1B,CD74,ADTRP,CNMD,ADGRB1
0.00030755	0.0131669	2.61809	negative regulation of phosphorylation	19	DEPTOR,GREM1,IRS2,NOG,PTPN22,RGS2,INHBA,SPRY1,SFN,BMP4,CEACAM1,ZFYVE28,PKIB,PTPRB,PYCARD,PTPRC,FABP4,LDLRAD4,IL1B
0.000321509	0.0136617	4.5354	positive regulation of lymphocyte differentiation	9	IL7R,ANXA1,ADAM8,IL18,EGR3,PTPRC,SHH,RASGRP1,CD74
0.00033273	0.0140338	2.07345	regulation of anatomical structure morphogenesis	46	SERPINF1,RGCC,GREM1,SEMA5A,SPHK1,EDN1,VEGFA,PLK2,MAP2,NTN4,ANXA1,LFNG,JCAD,NOG,SPP1,ADM2,ARHGAP18,NTRK2,SPRY1,LHX1,GPC4,C15orf62,BMP4,FES,CEACAM1,ROR1,ITGB2,CUX2,GPR4,SHH,NKD1,ADGRB3,DMRT2,ABI3,NEDD9,GRHL3,RIMS1,PALMD,PPP1R16B,C3AR1,LPAR1,SEMA6D,TGFB2,IL1B,CNMD,ADGRB1
0.000336012	0.014068	4.08273	cardiocyte differentiation	13	GREM1,RGS4,EDN1,VEGFA,RGS2,SPRY1,AKAP6,BMP4,PROX1,ACTN2,SOX6,ASB2,TGFB2
0.000347843	0.0144221	5.05707	cell adhesion mediated by integrin	8	CCN3,ITGBL1,LPXN,SKAP1,ITGB4,ITGA10,ITGB2,TGFB2
0.000349535	0.0144221	7.19147	negative regulation of blood pressure	6	APLN,KCNK6,ADM2,ADRB1,ADRB2,CNR1
0.000358182	0.0146726	3.73119	positive regulation of hemopoiesis	11	IL7R,ANXA1,ADAM8,GPR68,FES,IL18,EGR3,PTPRC,SHH,RASGRP1,CD74
0.000362618	0.0146991	2.21717	positive regulation of cell population proliferation	56	PTGS2,PLAC8,APLN,GREM1,IL24,VIPR1,SEMA5A,EFNB1,IL11,SPHK1,CD70,IGFBP2,PDGFB,IL7R,EDN1,VEGFA,IRS2,ANXA1,JCAD,NOG,FOXF1,VAV3,CRLF1,TGFA,SCG2,NTRK2,PTPN22,DLL4,DISP3,PBX1,LHX1,HBEGF,BMP4,BST2,HMGN5,CALCRL,IL18,PYCARD,PROX1,EGR3,PTPRC,CSF3,SHH,MMP9,AVPR1A,CXCR2,CSF2RB,HPGD,STAT5A,PPP1R16B,ST8SIA1,BMP5,TGFB2,IL1B,CD74,CHRD
0.000365511	0.0146991	2.4473	signal release	21	CCN3,PLA2G4A,ILDR2,IL11,EDN1,IRS2,ANXA1,SPP1,KCNA2,MAP2K6,SCG5,INHBA,SYT12,GPR68,ANO1,RAPGEF4,LIN7A,RIMS1,SNAP25,CNR1,IL1B
0.000370028	0.0146991	2.84612	ossification	22	PTGS2,GREM1,NPR2,CEBPB,NOG,SPP1,PHEX,MAP2K6,FSTL3,RORB,PBX1,BMP4,ADRB2,SHH,MMP9,CSGALNACT1,IFITM1,CDH11,BMP5,MMP13,TGFB2,CHRD
0.000370324	0.0146991	2.84628	regulation of cell adhesion	46	RGCC,GREM1,SEMA5A,ILDR2,EFNB1,LPXN,EDIL3,CD70,IGFBP2,TGM2,LIMCH1,PDGFB,IL7R,VEGFA,ANXA1,CEBPB,LMO7,FOXF1,ADAM8,VAV3,PTPN22,FSTL3,SKAP1,AGR2,BMP4,FES,CEACAM1,SPINT2,ITGB2,IL18,KIF26B,PYCARD,GPR4,EGR3,EPHA3,PTPRC,SHH,RASGRP1,FOXA1,NEDD9,LAPTM5,TGFB2,IL1B,CD74,ADTRP,CHRD
0.000371738	0.0146991	2.96282	regulation of transmembrane receptor protein serine/threonine kinase signaling pathway	15	CCN3,LTBP1,GREM1,NOG,FSTL3,INHBA,SPRY1,BMP4,ZNF423,SHH,HTRA3,LDLRAD4,BMP5,TGFB2,CHRD
0.000376477	0.0147839	4.42956	positive regulation of DNA-binding transcription factor activity	18	RGCC,GREM1,SPHK1,EDN1,VEGFA,ADAM8,ESR2,PPARGC1A,ARID5B,ROR1,IL18,PYCARD,ALK,CSF3,SHH,FOXA1,S100A8,IL1B
0.000384176	0.0149828	2.73453	pattern specification process	24	GREM1,EFNB1,EDN1,LFNG,NOG,FOXF1,ALX4,DLL4,COBL,PBX1,HOXB8,SPRY1,LHX1,BMP4,SHH,FOXA1,DMRT2,HOXB5,GRHL3,CXXC4,MAFB,ASB2,BMP5,CHRD
0.000391444	0.0151625	3.44476	blood circulation	27	PTGS2,APLN,RGS4,PDGFB,EDN1,VEGFA,NPR2,CELF2,KCNK6,MAP2K6,ADM2,NAV2,DLL4,RGS2,HRH2,ADRB1,HBEGF,CEACAM1,ACTA2,ADRB2,GPR4,CHRM3,AVPR1A,PDE3A,C3AR1,CNR1,TGFB2
0.000399515	0.0152672	3.23982	regulation of epithelial cell proliferation	23	SERPINF1,APLN,RGCC,SEMA5A,PDGFB,VEGFA,JCAD,NOG,TGFA,SCG2,PGR,DLL4,SFN,BMP4,CEACAM1,PROX1,EGR3,SHH,STAT5A,PPP1R16B,BMP5,TGFB2,CNMD
0.000401614	0.0152672	13.9863	positive regulation of branching involved in ureteric bud morphogenesis	4	GREM1,VEGFA,NOG,LHX1
0.000407554	0.0152672	2.19649	regulation of plasma membrane bounded cell projection organization	26	SERPINF1,SEMA5A,VEGFA,MAP2,SPP1,ATP8B1,NTRK2,COBL,RGS2,TENM2,C15orf62,FES,ROR1,CUX2,EPHA3,ALK,ADGRB3,DGKG,ABI3,SCARF1,SNAP25,PPP1R16B,LPAR1,SEMA6D,BMP5,CNR1
0.000418152	0.0155331	2.92748	negative regulation of transferase activity	15	DEPTOR,IRS2,PTPN22,RGS2,SPRY1,SFN,BMP4,CEACAM1,ZFYVE28,PKIB,PTPRB,PYCARD,PTPRC,FABP4,IL1B
0.000420109	0.0155331	4.90348	positive regulation of endothelial cell proliferation	11	APLN,SEMA5A,PDGFB,VEGFA,JCAD,SCG2,BMP4,PROX1,EGR3,STAT5A,PPP1R16B
0.000425453	0.0156292	29.3077	membranous septum morphogenesis	3	NOG,BMP4,TGFB2
0.000435816	0.0159073	2.8011	regulation of secretion by cell	31	CCN3,RGCC,PLA2G4A,IL11,ANKRD1,EDN1,IRS2,ANXA1,FOXF1,SPP1,ADAM8,KCNA2,MAP2K6,SCG5,INHBA,SYT12,GPR68,FES,CEACAM1,ANO1,RAPGEF4,ITGB2,RAB3C,AVPR1A,RIMS1,STXBP6,SNAP25,CNR1,TGFB2,IL1B,ADTRP
0.000440028	0.0159587	6.85624	positive regulation of anion transport	6	PLA2G4A,EDN1,CEBPB,MAP2K6,AVPR1A,IL1B
0.000459526	0.0165604	2.60388	cellular response to organic cyclic compound	29	PTGS2,SERPINF1,COLEC12,TGM2,RGS4,PDGFB,EDN1,ANXA1,CEBPB,FOXF1,SPP1,PHEX,PGR,INHBA,HRH2,AKAP6,ESR2,PLAT,BMP4,FES,SCNN1A,IL18,GNAL,ALK,FOXA1,CHRM3,PDE3A,IL1B,ADTRP
0.000477924	0.0171151	1.68354	system process	74	CCN3,PTGS2,SERPINF1,KCNK10,APLN,STRA6,CEMIP,SPHK1,NCAM2,RGS4,PDGFB,SYNM,EDN1,VEGFA,SLC6A9,SULF2,NPR2,PLK2,SMTN,CEBPB,CELF2,KCNK6,ATP8B1,ALDH1A3,KCNA2,MAP2K6,ABCG2,ADM2,CDH23,BCHE,NAV2,LEPR,NTRK2,EPHB1,PIEZO2,DLL4,RORB,RGS2,ATP8A1,INHBA,SPATA7,HOXB8,ABCC3,HRH2,AKAP6,ADRB1,HBEGF,BMP4,CEACAM1,ANO1,ALOXE3,ROR1,ACTA2,CALCRL,CUX2,ADRB2,GPR4,KCNB2,GNAL,ADGRB3,PTCHD1,CHRM3,RASGRF1,AVPR1A,ACTN2,PTPRZ1,RIM…
0.000494127	0.0175847	3.16291	regulation of lymphocyte proliferation	15	EFNB1,CD70,IGFBP2,IRS2,ANXA1,CEBPB,VAV3,PTPN22,BMP4,IL18,PYCARD,PTPRC,SHH,IL1B,CD74
0.000500644	0.017706	13.0532	renal vesicle development	4	GREM1,LHX1,BMP4,KIF26B
0.000508978	0.0178896	2.87094	cell adhesion	85	CCN3,PCDH7,CDH6,RGCC,ITGBL1,GREM1,SEMA5A,ILDR2,EFNB1,LPXN,EDIL3,CD70,IGFBP2,TGM2,NCAM2,LIMCH1,PDGFB,IL7R,VEGFA,NTN4,ANXA1,CEBPB,LMO7,JCAD,FOXF1,SPP1,ADAM8,VAV3,LAMA2,ADGRL3,CDH23,PTPN22,FSTL3,PCDH18,SKAP1,EPHB1,ITGB4,TENM2,CYFIP2,PGM5,SLITRK2,GPC4,AGR2,THEMIS2,COL7A1,BMP4,FES,CEACAM1,GLDN,CSF3R,ITGA10,SPINT2,ITGB2,IL18,KIF26B,PYCARD,GPR4,EGR3,EPHA3,PTPRC,SDK2,SHH,RASGRP1,FOXA1,ICAM5,COL8A2,NEDD9,…
0.000528748	0.0184705	2.74801	cognition	16	PTGS2,SERPINF1,KCNK10,STRA6,PLK2,CEBPB,BCHE,NTRK2,ATP8A1,CUX2,ADGRB3,PTCHD1,RASGRF1,PTPRZ1,SNAP25,CNR1
0.000533547	0.0185245	4.20677	response to lipopolysaccharide	18	PTGS2,IL24,ANKRD1,EDN1,THBD,CEBPB,PTPN22,SLPI,IL18,CXCL3,PYCARD,CSF3,S100A8,CSF2RB,HPGD,ACP5,CNR1,IL1B
0.000547818	0.0189047	6.5508	positive regulation of neural precursor cell proliferation	6	VEGFA,DLL4,DISP3,LHX1,PROX1,SHH
0.000564906	0.0193769	4.17142	positive regulation of endothelial cell migration	11	PTGS2,SEMA5A,PDGFB,EDN1,VEGFA,PLK2,ANXA1,JCAD,BMP4,PROX1,STAT5A
0.00060416	0.0205993	12.3015	ovulation	6	PTGS2,PGR,RGS2,INHBA,PLAT,HPGD
0.000620602	0.021034	4.11269	branching morphogenesis of an epithelial tube	13	GREM1,EDN1,VEGFA,NOG,FOXF1,PGR,DLL4,PBX1,SPRY1,LHX1,BMP4,SHH,FOXA1
0.000628627	0.0211799	24.4218	regulation of immature T cell proliferation	3	BMP4,SHH,IL1B
0.000633568	0.0212208	1.6731	positive regulation of RNA metabolic process	55	PLAC8,APLN,RGCC,GREM1,IL11,ANKRD1,PDGFB,EDN1,VEGFA,ETV1,CEBPB,LMO7,NOG,FOXF1,SPP1,ALX4,PLEKHN1,SSBP2,FSTL3,SKAP1,PGR,ZNF175,RORB,INHBA,TFCP2L1,PBX1,ZNF845,LHX1,ESR2,PPARGC1A,BMP4,ARID5B,EBF2,CSRNP3,HMGN5,IL18,ADRB2,NR5A2,PROX1,ZNF423,EGR3,CSF3,SHH,FOXA1,LMO2,DMRT2,HOXB5,GRHL3,ACTN2,AFAP1L2,MAFB,BMP5,TGFB2,IL1B,CD74
0.000647559	0.0215013	8.17333	positive regulation of cell migration involved in sprouting angiogenesis	5	PTGS2,VEGFA,PLK2,ANXA1,JCAD
0.000649495	0.0215013	3.7297	mesenchymal cell differentiation	16	RGCC,GREM1,SEMA5A,EFNB1,EDN1,NOG,SPRY1,BMP4,EPHA3,SHH,FOXA1,LDLRAD4,SEMA6D,BMP5,TGFB2,IL1B
0.000662787	0.0218145	2.0311	brain development	29	SEMA5A,SPHK1,RGS4,IRS2,NOG,ALDH1A3,ADGRL3,NTRK2,PCDH18,EPHB1,RGS2,INHBA,PBX1,LHX1,BMP4,UNC5C,PROX1,ALK,SHH,PTCHD1,KCNC1,AVPR1A,TSPAN2,FOXP2,SOX6,MAFB,RGS7,SEMA6D,BMP5
0.000677746	0.0221787	2.38095	regulation of nervous system development	20	SERPINF1,SEMA5A,TGM2,VEGFA,MAP2,NOG,SPP1,NTRK2,EPHB1,DLL4,SLITRK2,SLITRK5,CUX2,SHH,ADGRB3,PTPRZ1,CLSTN2,SEMA6D,IL1B,ADGRB1
0.000735309	0.0237949	3.02186	negative regulation of immune system process	26	CCN3,GREM1,ILDR2,LPXN,IL7R,PLK2,ANXA1,CEBPB,FOXF1,A2M,PTPN22,FSTL3,INHBA,GPR68,BMP4,CEACAM1,BST2,PTPRC,SHH,LAPTM5,MAFB,BMP5,CNR1,TGFB2,CD74,ADTRP
0.000737429	0.0237949	1.79626	positive regulation of transcription by RNA polymerase II	41	PLAC8,RGCC,GREM1,IL11,EDN1,VEGFA,ETV1,CEBPB,LMO7,NOG,FOXF1,ALX4,SSBP2,FSTL3,SKAP1,PGR,ZNF175,RORB,INHBA,TFCP2L1,PBX1,ZNF845,PPARGC1A,BMP4,EBF2,CSRNP3,IL18,ADRB2,NR5A2,PROX1,EGR3,CSF3,SHH,FOXA1,LMO2,DMRT2,HOXB5,GRHL3,MAFB,BMP5,IL1B
0.000739674	0.0237949	7.90925	salivary gland development	5	TGM2,NTN4,TFCP2L1,SHH,TGFB2
0.00074734	0.0238689	3.9988	vascular process in circulatory system	18	PTGS2,EDN1,VEGFA,SLC6A9,ABCG2,LEPR,RGS2,ATP8A1,ABCC3,HRH2,ADRB1,CEACAM1,ACTA2,ADRB2,GPR4,CHRM3,AVPR1A,PDE3A
0.000750358	0.0238689	2.75538	positive regulation of secretion	17	RGCC,PLA2G4A,ANKRD1,EDN1,IRS2,SPP1,ADAM8,MAP2K6,INHBA,GPR68,ANO1,ITGB2,AVPR1A,S100A8,CNR1,TGFB2,IL1B
0.000769278	0.0242775	4.44108	sensory perception of pain	9	CCN3,PTGS2,EDN1,KCNA2,EPHB1,HOXB8,ANO1,ALOXE3,CNR1
0.00077173	0.0242775	3.64076	morphogenesis of a branching structure	17	GREM1,TGM2,EDN1,VEGFA,NTN4,NOG,FOXF1,PGR,DLL4,PBX1,SPRY1,LHX1,BMP4,SPINT2,PROX1,SHH,FOXA1
0.000824092	0.0257823	6.01473	platelet-derived growth factor receptor signaling pathway	6	CSPG4,PDGFB,VEGFA,TXNIP,PLAT,ARID5B
0.000839019	0.0261059	4.37673	negative regulation of developmental growth	12	PLAC8,SEMA5A,RGS4,MAP2,NOG,SPP1,RGS2,ADRB1,BMP4,ADRB2,NKD1,SEMA6D
0.000849049	0.0262744	3.33894	tissue remodeling	11	GREM1,CSPG4,SPP1,ADAM8,LEPR,DLL4,CEACAM1,IL18,ADRB2,PDK4,ACP5
0.00087365	0.0268895	2.71158	hormone transport	15	CCN3,ILDR2,IL11,EDN1,IRS2,ANXA1,SPP1,SCG5,INHBA,GPR68,ANO1,RAPGEF4,SNAP25,CNR1,IL1B
0.000884609	0.0270805	20.9318	negative regulation of T cell mediated cytotoxicity	3	IL7R,CEACAM1,PTPRC
0.000899759	0.0271342	4.32632	gland morphogenesis	12	TGM2,NTN4,CEBPB,NOG,TGFA,PGR,BMP4,CEACAM1,PROX1,SHH,FOXA1,TGFB2
0.000900661	0.0271342	10.8759	regulation of icosanoid secretion	4	PLA2G4A,EDN1,MAP2K6,IL1B
0.000900661	0.0271342	10.8759	hepatocyte proliferation	4	CEBPB,TGFA,CEACAM1,PROX1
0.000905887	0.027148	2.70128	wound healing	24	TFPI2,SERPIND1,PLA2G4A,IL24,DYSF,PDGFB,EDN1,THBD,VEGFA,ANXA1,NOG,VAV3,TGFA,HBEGF,PLAT,CEACAM1,ACTA2,GPR4,SHH,DGKG,GRHL3,S100A8,TGFB2,ADTRP
0.000916959	0.0273359	2.51639	regulation of ion transmembrane transport	23	KCNK10,CEMIP,RGS4,JPH2,EDN1,SLC6A9,KCNK6,KCNA2,RGS2,NALCN,AKAP6,CACNG6,TCAF2,ADRB2,KCNB2,MMP9,KCNC1,CHRM3,RASGRF1,ACTN2,WNK2,CACNG4,RGS7
0.000937811	0.0278119	1.39936	cellular component organization or biogenesis	158	CCN3,SERPINF1,KRT8,CDH6,APLN,RGCC,DEPTOR,GREM1,BMF,TBC1D4,SEMA5A,EFNB1,LPXN,SPHK1,IQGAP2,ANKRD1,NCAM2,RGS4,DYSF,LIMCH1,CSPG4,PDGFB,IL7R,SYNM,EDN1,VEGFA,SULF2,ETV1,PLK2,MAP2,NTN4,ANXA1,FRY,SMTN,LPL,NOG,CELF2,FOXF1,SPP1,KRT75,ATP8B1,ADAM8,VAV3,ALDH1A3,KCNA2,LAMA2,ADGRL3,DNER,SH3TC2,GAS2L1,TGFA,CDH23,ARHGAP18,NAV2,NTRK2,GPRIN3,ARHGAP28,SKAP1,EPHB1,COBL,PAPPA2,REPS2,RGS2,ATP8A1,ITGB4,INHBA,SPATA7,TEN…
0.000949844	0.0280229	4.89586	positive regulation of kinase activity	28	RGCC,GREM1,CEMIP,PDGFB,EDN1,VEGFA,ADAM8,VAV3,FZD8,MAP2K6,TGFA,NTRK2,EPHB1,HBEGF,GPRC5B,ROR1,IL18,ADRB2,PROX1,EPHA3,ALK,PTPRC,RASGRP1,NEDD9,AFAP1L2,TGFB2,IL1B,CD74
0.000965587	0.0283405	3.52896	morphogenesis of embryonic epithelium	10	GREM1,NOG,ALDH1A3,COBL,BMP4,SPINT2,SHH,GRHL3,BMP5,TGFB2
0.00097531	0.028479	2.06044	embryo development ending in birth or egg hatching	26	PDGFB,EDN1,VEGFA,SULF2,CEBPB,LFNG,NOG,FOXF1,ALX4,COBL,PLPP4,PBX1,HOXB8,LHX1,BMP4,SPINT2,NR5A2,PROX1,SHH,FOXA1,DMRT2,HOXB5,GRHL3,BMP5,TGFB2,CHRD
0.000997078	0.0289661	2.35899	positive regulation of leukocyte activation	19	PLA2G4A,EFNB1,CD70,IGFBP2,IL7R,IRS2,ANXA1,ADAM8,VAV3,PTPN22,ITGB2,IL18,PYCARD,EGR3,PTPRC,SHH,RASGRP1,IL1B,CD74
0.00101928	0.0294608	3.81524	response to steroid hormone	18	PTGS2,SERPINF1,IGFBP2,EDN1,ANXA1,SPP1,TXNIP,A2M,BCHE,PGR,ESR2,PLAT,BMP4,PAPPA,FOXA1,AVPR1A,TGFB2,ADTRP
0.00103199	0.029578	3.25418	negative regulation of leukocyte activation	13	ILDR2,ANXA1,CEBPB,FOXF1,PTPN22,INHBA,BMP4,CEACAM1,PTPRC,SHH,LAPTM5,CNR1,CD74
0.00103372	0.029578	3.25311	positive regulation of MAPK cascade	27	IL11,SPHK1,CSPG4,PDGFB,EDN1,VEGFA,JCAD,ADAM8,FZD8,MAP2K6,TGFA,NTRK2,PTPN22,DOK6,BMP4,ACTA2,ADRB2,PYCARD,ALK,PTPRC,RASGRP1,LAPTM5,ACKR3,LPAR1,TGFB2,IL1B,CD74
0.00104132	0.0296465	10.3894	regulation of organic acid transport	8	PLA2G4A,RGS4,EDN1,IRS2,MAP2K6,RGS2,AVPR1A,IL1B
0.0010565	0.029929	3.7946	bone development	14	GREM1,TGM2,SULF2,NPR2,PHEX,MAP2K6,LEPR,PAPPA2,GPR68,BMP4,PTPRC,CSGALNACT1,ACP5,MMP13
0.00107303	0.0302467	10.3029	liver morphogenesis	4	CEBPB,TGFA,CEACAM1,PROX1
0.00108428	0.0304133	4.78239	positive regulation of phosphatidylinositol 3-kinase signaling	7	PDGFB,NTRK2,ROR1,IL18,CSF3,UNC5B,TGFB2
0.00111912	0.0311924	1.89284	response to cytokine	36	PTGS2,IL24,SPHK1,CD70,ANKRD1,PDGFB,IL7R,EDN1,NPR2,ANXA1,CEBPB,FOXF1,CRLF1,LEPR,AKAP6,CEACAM1,BST2,ARID5B,CSF3R,IL18,CXCL3,PYCARD,NR5A2,PTPRC,CSF3,FABP4,CXCR2,LAPTM5,CSF2RB,STAT5A,IFITM1,ACKR3,LSP1,ACP5,IL1B,CD74
0.00112302	0.0311924	3.45436	positive regulation of lipid metabolic process	10	PTGS2,PDGFB,IRS2,ANXA1,VAV3,DISP3,PPARGC1A,AVPR1A,IL1B,CD74
0.00115426	0.0313591	2.46315	homeostatic process	66	CCN3,PTGS2,SERPINF1,PLAC8,CEMIP,ILDR2,TGM2,JPH2,IL7R,EDN1,VEGFA,SLC6A9,IRS2,ANXA1,CEBPB,LPL,SPP1,ADAM8,SESN3,LAMA2,MAP2K6,CDH23,LEPR,INHBA,SPATA7,DISP3,ACOX2,AKAP6,ADRB1,G0S2,SFN,GPR68,PPARGC1A,BMP4,ANO1,SCNN1A,ALOXE3,EBF2,IL18,TLCD4,CALB2,ADRB2,NR5A2,GPR4,ZNF423,ALK,PTPRC,FOXA1,FABP4,PDK4,GRHL3,AVPR1A,CXCR2,S100A8,WNK2,ALAS2,CYP39A1,ACKR3,MAFB,C3AR1,ACP5,LPAR1,CNR1,ACADL,IL1B,CD74
0.00116708	0.0313591	5.58825	regulation of morphogenesis of an epithelium	8	GREM1,VEGFA,NTN4,NOG,LHX1,BMP4,SHH,NKD1
0.00116802	0.0313591	4.71663	muscle organ morphogenesis	7	ANKRD1,NOG,DLL4,ARID5B,PROX1,XIRP2,TGFB2
0.00118529	0.0313591	2.00153	anterograde trans-synaptic signaling	27	PTGS2,RGS4,EDN1,PLK2,LAMA2,BCHE,NTRK2,EPHB1,HRH2,SYT12,PLAT,LIN7A,CALB2,CUX2,ADRB2,EGR3,PTCHD1,CHRM3,RASGRF1,RIMS1,CACNG4,SNAP25,CLSTN2,CDH11,CNR1,IL1B,ADGRB1
0.00119504	0.0313591	97.9202	metanephric renal vesicle morphogenesis	4	GREM1,LHX1,BMP4,KIF26B
0.00119803	0.0313591	1.87448	regulation of localization	111	CCN3,PTGS2,SERPINF1,MEST,KCNK10,MTUS1,APLN,RGCC,GREM1,PLA2G4A,CEMIP,IL24,TBC1D4,SEMA5A,IL11,SPHK1,ANKRD1,TGM2,RGS4,DYSF,LIMCH1,PDGFB,JPH2,EDN1,VEGFA,SLC6A9,IRS2,PLK2,MAP2,ANXA1,CEBPB,LPL,JCAD,NOG,KCNK6,FOXF1,SPP1,ATP8B1,ADAM8,KCNA2,LAMA2,SH3TC2,MAP2K6,ARHGAP18,LEPR,SCG5,DLL4,RGS2,ATP8A1,PLPP4,INHBA,HOMER3,NALCN,DISP3,DACH1,AKAP6,GPC4,AGR2,HBEGF,SYT12,SFN,GPR68,BMP4,FES,CEACAM1,BST2,ANO1,CACNG6,UN…
0.00119817	0.0313591	18.3143	short-term memory	3	SERPINF1,CUX2,PTCHD1
0.00119817	0.0313591	18.3143	negative regulation of multicellular organism growth	3	PLAC8,ADRB1,ADRB2
0.00119817	0.0313591	18.3143	negative thymic T cell selection	3	PTPRC,SHH,CD74
0.00119817	0.0313591	18.3143	lateral sprouting from an epithelium	3	NOG,BMP4,SHH
0.00119817	0.0313591	18.3143	cellular response to UV-A	3	MMP1,MMP3,MMP9
0.00120612	0.0313591	97.455	norepinephrine-epinephrine-mediated vasodilation involved in regulation of systemic arterial blood pressure	2	ADRB1,ADRB2
0.00120612	0.0313591	97.455	positive regulation of ovulation	2	INHBA,PLAT
0.00120612	0.0313591	97.455	positive regulation of peptidyl-tyrosine autophosphorylation	2	GREM1,VEGFA
0.00124723	0.0322805	2.20954	cellular response to oxygen-containing compound	49	PTGS2,SERPINF1,IL24,TBC1D4,SPHK1,COLEC12,ANKRD1,TGM2,RGS4,PDGFB,EDN1,IRS2,ANXA1,CEBPB,LPL,SPP1,PHEX,SESN3,MAP2K6,NTRK2,PTPN22,RORB,INHBA,HRH2,AKAP6,ESR2,PLAT,GPR68,FES,CEACAM1,ANO1,CALCRL,IL18,CXCL3,ADRB2,MMP3,PYCARD,GNAL,EPHA3,ALK,CSF3,MMP9,PDK4,CHRM3,AVPR1A,ACTN2,PDE3A,STAT5A,IL1B
0.00127483	0.0328457	2.16373	regulation of transport	78	CCN3,PTGS2,KCNK10,APLN,RGCC,GREM1,PLA2G4A,CEMIP,TBC1D4,IL11,SPHK1,ANKRD1,TGM2,RGS4,DYSF,PDGFB,JPH2,EDN1,VEGFA,SLC6A9,IRS2,MAP2,ANXA1,CEBPB,KCNK6,FOXF1,SPP1,ATP8B1,ADAM8,KCNA2,SH3TC2,MAP2K6,LEPR,SCG5,RGS2,ATP8A1,PLPP4,INHBA,HOMER3,NALCN,DISP3,AKAP6,SYT12,SFN,GPR68,BMP4,FES,CEACAM1,ANO1,CACNG6,RAPGEF4,ITGB2,TCAF2,ADRB2,PYCARD,KCNB2,EPHA3,PTPRC,RAB3C,SHH,MMP9,KCNC1,CHRM3,RASGRF1,AVPR1A,S100A8,ACTN2,…
0.00129128	0.0331196	4.07325	positive regulation of ion transmembrane transporter activity	9	JPH2,EDN1,SLC6A9,AKAP6,ADRB2,KCNC1,ACTN2,WNK2,CACNG4
0.00131485	0.0335729	1.53589	regulation of cellular protein metabolic process	70	TFPI2,PTGS2,SERPINF1,SERPIND1,RGCC,DEPTOR,GREM1,CEMIP,IL24,IL11,SPHK1,LIMCH1,CSPG4,PDGFB,EDN1,VEGFA,FRY,NNMT,NOG,PLEKHN1,ADAM8,FZD8,MAP2K6,CRLF1,TGFA,A2M,LEPR,NTRK2,PTPN22,RGS2,INHBA,SLPI,CYFIP2,SPRY1,HBEGF,PLAT,SFN,GPRC5B,PPARGC1A,COL7A1,BMP4,CEACAM1,BST2,ZFYVE28,PKIB,SPINT2,PTPRB,ITGB2,IL18,ADRB2,PYCARD,PROX1,PTPRC,CSF3,SHH,RASGRP1,MMP9,FABP4,NEDD9,S100A8,AFAP1L2,LAPTM5,PPP1R16B,LDLRAD4,BMP5,TG…
0.00136881	0.0347947	2.95571	positive regulation of transmembrane transport	12	CEMIP,JPH2,EDN1,SLC6A9,IRS2,AKAP6,ADRB2,KCNC1,ACTN2,WNK2,CACNG4,RGS7
0.00142128	0.0356194	1.52304	biological regulation	307	CCN3,TFPI2,PTGS2,SERPINF1,SERPIND1,MEST,KCNK10,CDH6,PLAC8,MTUS1,APLN,SPOCD1,STRA6,RGCC,DEPTOR,ITGBL1,LTBP1,GREM1,PLA2G4A,BMF,CEMIP,IL24,VIPR1,TBC1D4,SEMA5A,ILDR2,EFNB1,IL11,LPXN,EDIL3,SPHK1,SHISA3,IQGAP2,COLEC12,CD70,IGFBP2,ANKRD1,TGM2,RGS4,HBA1,DYSF,LIMCH1,CSPG4,PDGFB,JPH2,IL7R,EDN1,THBD,VEGFA,RTN1,SLC6A9,IRS2,SULF2,NPR2,ETV1,PLK2,MAP2,NTN4,ANXA1,FRY,CEBPB,LMO7,DEPP1,FOXQ1,LFNG,NNMT,LPL,JCAD,NOG…
0.0014217	0.0356194	1.76656	negative regulation of protein metabolic process	38	TFPI2,PTGS2,SERPINF1,SERPIND1,DEPTOR,GREM1,EDN1,VEGFA,RTN1,FRY,NOG,PLEKHN1,A2M,NTRK2,PTPN22,RGS2,SLPI,SPRY1,HBEGF,PLAT,SFN,COL7A1,BMP4,CEACAM1,BST2,ZFYVE28,PKIB,SPINT2,PTPRB,PYCARD,PTPRC,SHH,MMP9,FABP4,PPP1R16B,LDLRAD4,IL1B,ADGRB1
0.0014244	0.0356194	2.94092	anterior/posterior pattern specification	12	LFNG,NOG,FOXF1,ALX4,COBL,PBX1,HOXB8,LHX1,BMP4,SHH,DMRT2,HOXB5
0.00142628	0.0356194	5.35683	negative regulation of lipid biosynthetic process	6	SPHK1,PDGFB,CEACAM1,PROX1,BMP5,ACADL
0.00143653	0.0357187	6.69468	endothelial cell migration	23	CCN3,PTGS2,SERPINF1,RGCC,GREM1,PRSS3,SEMA5A,LPXN,PDGFB,EDN1,VEGFA,PLK2,ANXA1,JCAD,SCG2,DLL4,BMP4,CEACAM1,PROX1,EGR3,STAT5A,ADTRP,ADGRB1
0.00147164	0.0364326	3.60576	positive regulation of neuron projection development	12	SERPINF1,NTRK2,COBL,RGS2,FES,ROR1,CUX2,EPHA3,ALK,SCARF1,BMP5,CNR1
0.00148146	0.0364428	6.65604	positive regulation of protein tyrosine kinase activity	7	GREM1,PDGFB,TGFA,HBEGF,GPRC5B,NEDD9,AFAP1L2
0.00148485	0.0364428	9.32067	positive regulation of fatty acid transport	4	PLA2G4A,EDN1,MAP2K6,IL1B
0.00152124	0.0370278	16.4776	positive regulation of heart contraction	8	APLN,RGS4,EDN1,ADM2,RGS2,ADRB1,AVPR1A,TGFB2
0.00154111	0.0370278	2.39002	negative regulation of hydrolase activity	17	TFPI2,PTGS2,SERPINF1,SERPIND1,VEGFA,ANXA1,A2M,LEPR,RGS2,SLPI,SPRY1,SFN,COL7A1,BST2,SPINT2,MMP9,TGFB2
0.00154436	0.0370278	3.57934	regulation of wound healing	9	PDGFB,EDN1,THBD,ANXA1,HBEGF,PLAT,CEACAM1,ACTA2,ADTRP
0.00155486	0.0370278	4.47063	somite development	7	LFNG,NOG,FOXF1,COBL,LHX1,SHH,DMRT2
0.00156472	0.0370278	2.76492	anatomical structure maturation	13	GREM1,EDN1,VEGFA,NPR2,NTN4,PGR,TFCP2L1,GLDN,FOXA1,ADGRB3,SCARF1,PDE3A,TGFB2
0.00157217	0.0370278	1.59397	positive regulation of cellular biosynthetic process	62	PTGS2,PLAC8,APLN,RGCC,GREM1,IL11,ANKRD1,PDGFB,EDN1,VEGFA,SLC6A9,IRS2,ETV1,ANXA1,CEBPB,LMO7,NNMT,NOG,FOXF1,SPP1,ALX4,SSBP2,FSTL3,SKAP1,PGR,ZNF175,RORB,INHBA,TFCP2L1,PBX1,ZNF845,LHX1,ESR2,PARM1,PPARGC1A,BMP4,ARID5B,PKIB,EBF2,CSRNP3,HMGN5,IL18,ADRB2,NR5A2,PROX1,ZNF423,EGR3,CSF3,SHH,FOXA1,LMO2,DMRT2,HOXB5,GRHL3,AVPR1A,ACTN2,AFAP1L2,MAFB,BMP5,TGFB2,IL1B,CD74
0.00157372	0.0370278	16.2785	regulation of heat generation	3	PTGS2,CNR1,IL1B
0.00157372	0.0370278	16.2785	negative regulation of pathway-restricted SMAD protein phosphorylation	3	GREM1,NOG,LDLRAD4
0.00157372	0.0370278	16.2785	positive regulation of macrophage cytokine production	3	GPRC5B,LAPTM5,CD74
0.00157372	0.0370278	16.2785	cellular response to follicle-stimulating hormone stimulus	3	EDN1,INHBA,PLAT
0.00159591	0.0373955	3.07035	negative regulation of cell-cell adhesion	13	RGCC,ILDR2,VEGFA,ANXA1,CEBPB,PTPN22,BMP4,CEACAM1,SPINT2,SHH,LAPTM5,CD74,ADTRP
0.00162011	0.0378069	5.21181	positive regulation of synaptic transmission	11	PTGS2,PLK2,LAMA2,NTRK2,SYT12,CALB2,RIMS1,CACNG4,SNAP25,CLSTN2,CNR1
0.00166842	0.0387755	3.90056	development of primary female sexual characteristics	8	VEGFA,CEBPB,LFNG,A2M,PGR,INHBA,DACH1,ARID5B
0.00171265	0.0395836	3.52214	mammary gland development	9	APLN,VEGFA,IRS2,CEBPB,FOXF1,TGFA,PGR,BMP4,STAT5A
0.0017171	0.0395836	3.88108	icosanoid metabolic process	10	PTGS2,PLA2G4A,EDN1,ANXA1,ALOXE3,GGT5,AVPR1A,HPGD,IL1B,CD74
0.00173008	0.0397221	1.80628	positive regulation of multicellular organismal process	70	PTGS2,SERPINF1,PLAC8,APLN,RGCC,GREM1,SEMA5A,SPHK1,TGM2,RGS4,PDGFB,IL7R,EDN1,THBD,VEGFA,SULF2,ANXA1,CEBPB,LPL,JCAD,NOG,ADAM8,ADM2,LEPR,NTRK2,PTPN22,EPHB1,RGS2,INHBA,SLITRK2,HRH2,SPRY1,AKAP6,LHX1,ADRB1,G0S2,PLAT,GPRC5B,GPR68,PPARGC1A,BMP4,FES,EBF2,SLITRK5,IL18,CUX2,ADRB2,PYCARD,PROX1,EGR3,PTPRC,SHH,RASGRP1,ADGRB3,FABP4,CHRM3,AVPR1A,PTPRZ1,AFAP1L2,RIMS1,LAPTM5,SOX6,CLSTN2,C3AR1,CNR1,ACADL,TGFB2,IL1B…
0.00177993	0.0405714	2.23579	behavior	29	PTGS2,SERPINF1,KCNK10,APLN,STRA6,ETV1,PLK2,CEBPB,ALDH1A3,KCNA2,ADM2,CDH23,BCHE,NAV2,LEPR,NTRK2,ATP8A1,HOXB8,DACH1,ADRB1,CUX2,ALK,ADGRB3,PTCHD1,RASGRF1,AVPR1A,PTPRZ1,SNAP25,CNR1
0.00178132	0.0405714	1.4339	response to stress	105	CCN3,TFPI2,PTGS2,SERPINF1,SERPIND1,PLAC8,RGCC,PLA2G4A,IL24,SPHK1,COLEC12,ANKRD1,HBA1,DYSF,PDGFB,IL7R,EDN1,THBD,VEGFA,PLK2,ANXA1,CEBPB,LPL,NOG,FOXF1,SPP1,PLEKHN1,ADAM8,VAV3,SESN3,MAP2K6,CFH,GAS2L1,TXNIP,TGFA,A2M,SCG2,PTPN22,NCF2,ZNF175,EPHB1,PAPPA2,ITGB4,INHBA,SLPI,ACOX2,AGR2,ADRB1,HBEGF,THEMIS2,PLAT,SFN,GPRC5B,GPR68,PPARGC1A,BMP4,FES,CEACAM1,BST2,ANO1,CSF3R,ACTA2,ITGB2,CALCRL,IL18,CXCL3,ADRB2,MMP…
0.00180214	0.0408821	3.49422	epithelial tube formation	9	GREM1,NOG,COBL,BMP4,SPINT2,PROX1,GRHL3,BMP5,TGFB2
0.0018674	0.0420275	6.2841	lung alveolus development	5	STRA6,FOXF1,PGR,BMP4,FOXA1
0.0018674	0.0420275	6.2841	positive regulation of potassium ion transmembrane transport	5	AKAP6,KCNC1,ACTN2,WNK2,RGS7
0.00187909	0.0421241	1.73606	positive regulation of gene expression	38	PTGS2,RGCC,SPHK1,PDGFB,IL7R,VEGFA,SULF2,ANXA1,CEBPB,LPL,NOG,ADAM8,ADM2,NTRK2,PTPN22,PGR,DLL4,INHBA,AGR2,GPRC5B,PPARGC1A,BMP4,HMGN5,ACTA2,IL18,CUX2,PYCARD,PTPRC,SHH,RASGRP1,GRHL3,AFAP1L2,RIMS1,LAPTM5,C3AR1,IL1B,CD74,ADTRP
0.00189351	0.042281	3.81668	regulation of signaling receptor activity	12	GREM1,EDN1,SLC6A9,NOG,TGFA,ESR2,HBEGF,DKK2,ZFYVE28,ADRB2,RASGRF1,CACNG4
0.00193329	0.0430005	3.45461	kidney development	22	SERPINF1,STRA6,GREM1,PDGFB,VEGFA,SULF2,NOG,CRLF1,PBX1,SPRY1,LHX1,BMP4,ARID5B,ACTA2,KIF26B,GPR4,PROX1,SHH,MMP9,FREM2,HPGD,TGFB2
0.00201533	0.0444608	14.6499	hemoglobin biosynthetic process	3	SLC6A9,INHBA,ALAS2
0.00201533	0.0444608	14.6499	eyelid development in camera-type eye	3	STRA6,INHBA,GRHL3
0.00202237	0.0444608	6.15818	regulation of morphogenesis of a branching structure	7	GREM1,VEGFA,NTN4,NOG,LHX1,BMP4,SHH
0.00203486	0.0445634	4.24893	stem cell development	7	SEMA5A,EFNB1,EDN1,BMP4,PTPRC,SHH,SEMA6D
0.00213833	0.04665	2.19673	actin filament organization	19	RGCC,SEMA5A,IQGAP2,RGS4,LIMCH1,GAS2L1,ARHGAP18,ARHGAP28,COBL,CYFIP2,C15orf62,DIAPH2,PYCARD,PROX1,CSF3,NEDD9,ACTN2,XIRP2,LPAR1
0.00218698	0.0475292	1.7038	regulation of signal transduction	104	CCN3,PTGS2,APLN,DEPTOR,LTBP1,GREM1,IL24,SEMA5A,IL11,LPXN,SPHK1,SHISA3,IGFBP2,ANKRD1,TGM2,RGS4,CSPG4,PDGFB,IL7R,EDN1,VEGFA,SLC6A9,SULF2,NPR2,PLK2,LFNG,JCAD,NOG,ADAM8,VAV3,LURAP1L,FZD8,SESN3,SH3TC2,MAP2K6,TGFA,ARHGAP18,SCG2,NTRK2,ARHGAP28,PTPN22,FSTL3,EPHB1,DLL4,RGS2,INHBA,HOMER3,CYFIP2,DOK6,SPRY1,AKAP6,GPC4,AGR2,ESR2,HBEGF,G0S2,GPRC5B,BMP4,DKK2,CEACAM1,BST2,ZFYVE28,ROR1,ACTA2,APCDD1L,IL18,CUX2,ADR…
0.00220909	0.0476635	2.37297	establishment of protein localization to extracellular region	16	CCN3,ILDR2,ANKRD1,IRS2,ANXA1,ADAM8,SCG2,GPR68,ANO1,RAPGEF4,RAB3C,SNAP25,CNR1,TGFB2,IL1B,ADTRP
0.0022099	0.0476635	1.58373	developmental process	216	CCN3,PTGS2,SERPINF1,KRT8,MEST,CDH6,PLAC8,APLN,SPOCD1,STRA6,RGCC,GREM1,SEMA5A,ILDR2,EFNB1,IL11,LPXN,SPHK1,IGFBP2,ANKRD1,TGM2,NCAM2,RGS4,DYSF,CSPG4,PDGFB,JPH2,IL7R,EDN1,VEGFA,IRS2,SULF2,NPR2,ETV1,PLK2,MAP2,NTN4,ANXA1,FRY,SMTN,CEBPB,FOXQ1,LFNG,NNMT,LPL,JCAD,NOG,FOXF1,SPP1,KRT75,ALX4,ATP8B1,ADAM8,VAV3,PAQR5,TNFAIP2,FZD8,PHEX,ALDH1A3,KCNA2,LAMA2,ADGRL3,DNER,SH3TC2,MAP2K6,ADM2,CRLF1,TXNIP,TGFA,A2M,CDH2…
0.00222836	0.0478804	1.90787	synaptic signaling	27	PTGS2,RGS4,EDN1,PLK2,LAMA2,BCHE,NTRK2,EPHB1,HRH2,SYT12,PLAT,LIN7A,CALB2,CUX2,ADRB2,EGR3,PTCHD1,CHRM3,RASGRF1,RIMS1,CACNG4,SNAP25,CLSTN2,CDH11,CNR1,IL1B,ADGRB1
0.00226175	0.048415	1.95893	inflammatory response	37	CCN3,PTGS2,SERPINF1,SPHK1,PLK2,ANXA1,CEBPB,LPL,FOXF1,SPP1,ADAM8,A2M,SCG2,THEMIS2,GPRC5B,GPR68,ITGB2,CALCRL,IL18,CXCL3,MMP3,PYCARD,GPR4,PTPRC,RASGRP1,MMP9,FABP4,GGT5,CXCR2,S100A8,AFAP1L2,TSPAN2,CHST1,C3AR1,ACP5,CNR1,IL1B
0.00230734	0.0487462	3.36094	blood vessel diameter maintenance	9	PTGS2,EDN1,RGS2,HRH2,ADRB1,ACTA2,ADRB2,CHRM3,AVPR1A
0.00231535	0.0487462	2.9194	positive regulation of molecular function	64	RGCC,GREM1,CEMIP,TBC1D4,SPHK1,TGM2,RGS4,PDGFB,JPH2,EDN1,VEGFA,SLC6A9,LFNG,ADAM8,VAV3,FZD8,MAP2K6,TGFA,NTRK2,EPHB1,CYFIP2,AKAP6,ADRB1,ESR2,PARM1,HBEGF,GPRC5B,PPARGC1A,BMP4,ARID5B,PKIB,EBF2,RAPGEF4,ROR1,ITGB2,IL18,ADRB2,PYCARD,LGR5,PROX1,EPHA3,ALK,PTPRC,CSF3,SHH,RASGRP1,FOXA1,MMP9,KCNC1,RASGRF1,NEDD9,GRHL3,AVPR1A,S100A8,ACTN2,AFAP1L2,LAPTM5,WNK2,CACNG4,RGS7,LPAR1,TGFB2,IL1B,CD74
0.00231692	0.0487462	4.82835	G protein-coupled receptor signaling pathway, coupled to cyclic nucleotide second messenger	6	VIPR1,ANXA1,HRH2,CALCRL,CHRM3,CNR1
0.00231692	0.0487462	4.82835	positive regulation of NIK/NF-kappaB signaling	6	GREM1,SPHK1,EDN1,IL18,LAPTM5,IL1B
0.00233333	0.0487462	2.76112	developmental cell growth	12	SEMA5A,RGS4,EDN1,VEGFA,MAP2,SPP1,COBL,RGS2,CYFIP2,AKAP6,RIMS1,SEMA6D
0.00234134	0.0487462	3.35267	sensory organ morphogenesis	16	STRA6,EDN1,VEGFA,NOG,ALDH1A3,CDH23,NTRK2,EPHB1,RORB,LHX1,BMP4,PROX1,SDK2,COL8A2,GRHL3,MAFB
0.00234593	0.0487462	49.0907	heat generation	5	PTGS2,ADRB1,ADRB2,CNR1,IL1B
0.00236785	0.0487462	48.8541	glomerular mesangial cell development	3	PDGFB,ACTA2,GPR4
0.00237995	0.0487462	48.7249	positive regulation of immature T cell proliferation in thymus	2	SHH,IL1B
0.00237995	0.0487462	48.7249	paramesonephric duct development	2	STRA6,LHX1
0.00237995	0.0487462	48.7249	ureter smooth muscle development	2	BMP4,SHH
0.00237995	0.0487462	48.7249	trans-synaptic signaling by BDNF, modulating synaptic transmission	2	NTRK2,PLAT
0.00240839	0.0491519	2.28582	anatomical structure formation involved in morphogenesis	71	CCN3,PTGS2,SERPINF1,APLN,STRA6,RGCC,GREM1,SEMA5A,SPHK1,ANKRD1,TGM2,CSPG4,EDN1,VEGFA,PLK2,ANXA1,LFNG,JCAD,NOG,FOXF1,ATP8B1,ADAM8,VAV3,TNFAIP2,FZD8,ALDH1A3,ADM2,TGFA,SCG2,LEPR,EPHB1,DLL4,COBL,ITGB4,INHBA,PGM5,SPRY1,LHX1,COL7A1,BMP4,CEACAM1,SPINT2,PTPRB,ITGB2,THSD7A,CALCRL,IL18,KIF26B,GPR4,PROX1,EGR3,SDK2,SHH,FOXA1,MMP9,ADGRB3,COL8A2,DMRT2,GRHL3,ACTN2,UNC5B,PPP1R16B,ACKR3,MAFB,C3AR1,BMP5,TGFB2,IL1B,…
0.00242071	0.0492268	3.33549	regulation of tube size	9	PTGS2,EDN1,RGS2,HRH2,ADRB1,ACTA2,ADRB2,CHRM3,AVPR1A
0.00249873	0.0499563	4.75022	negative regulation of muscle cell differentiation	6	CCN3,RGS4,PDGFB,RGS2,SHH,SOX6
0.00249873	0.0499563	4.75022	regulation of hemostasis	6	PDGFB,EDN1,THBD,PLAT,CEACAM1,ADTRP
0.00251063	0.0499563	5.83429	endocardial cushion development	5	NOG,FOXF1,BMP4,BMP5,TGFB2
0.00252677	0.0499563	13.3173	neuron remodeling	3	NTN4,ADGRB3,SCARF1
0.00252677	0.0499563	13.3173	optic nerve development	3	KCNA2,NAV2,EPHB1
0.00252677	0.0499563	13.3173	hyaluronan biosynthetic process	3	CEMIP,PDGFB,IL1B
0.00252677	0.0499563	13.3173	nose development	3	STRA6,ALDH1A3,PROX1
0.00252677	0.0499563	13.3173	positive thymic T cell selection	3	PTPRC,SHH,CD74
0.00254351	0.0500285	2.6062	regulation of blood circulation	13	PTGS2,APLN,RGS4,EDN1,CELF2,ADM2,RGS2,HRH2,ADRB1,HBEGF,CHRM3,AVPR1A,TGFB2
0.00258803	0.0500285	3.06109	respiratory tube development	12	STRA6,VEGFA,NOG,FOXF1,PHEX,PGR,SPRY1,AGR2,BMP4,PROX1,SHH,FOXA1
0.00261618	0.0500285	7.82766	regulation of T-helper 1 type immune response	4	PLA2G4A,ANXA1,IL18,IL1B
0.00261618	0.0500285	7.82766	physiological cardiac muscle hypertrophy	4	RGS4,EDN1,RGS2,AKAP6
0.00261618	0.0500285	7.82766	positive regulation of vascular endothelial growth factor production	4	PTGS2,SULF2,C3AR1,IL1B
0.00261618	0.0500285	7.82766	cranial nerve morphogenesis	4	ATP8B1,KCNA2,EPHB1,MAFB
0.00261618	0.0500285	7.82766	myeloid leukocyte cytokine production	4	GPRC5B,LAPTM5,TGFB2,CD74
0.00261618	0.0500285	7.82766	kidney vasculature development	4	PDGFB,BMP4,ACTA2,GPR4
0.00261947	0.0500285	2.59681	leukocyte differentiation	30	IL11,IL7R,VEGFA,ANXA1,CEBPB,LFNG,ADAM8,FZD8,LEPR,PTPN22,FSTL3,DLL4,INHBA,PBX1,OSCAR,GPR68,BMP4,FES,CEACAM1,IL18,EGR3,PTPRC,CSF3,SHH,RASGRP1,MMP9,TSPAN2,MAFB,IL1B,CD74
0.0026222	0.0500285	4.0481	negative regulation of response to wounding	7	PDGFB,EDN1,THBD,SPP1,PLAT,CEACAM1,ADTRP
0.00262707	0.0500285	4.69816	nephron morphogenesis	8	GREM1,VEGFA,NOG,PBX1,LHX1,BMP4,KIF26B,SHH
0.00274825	0.0521521	3.57967	regulation of lipid transport	8	PLA2G4A,EDN1,IRS2,SPP1,MAP2K6,ATP8A1,DISP3,IL1B
0.0027569	0.0521521	5.69829	acute-phase response	5	PTGS2,CEBPB,A2M,CNR1,IL1B
0.002787	0.0524541	2.84509	calcium-mediated signaling	11	SPHK1,EDN1,RCAN2,HOMER3,AKAP6,NR5A2,PTPRC,CHRM3,AVPR1A,CXCR2,ACKR3
0.00279129	0.0524541	3.02719	cellular response to BMP stimulus	10	GREM1,NOG,FSTL3,BMP4,SPINT2,ZNF423,HTRA3,BMP5,TGFB2,CHRD
0.0028148	0.052722	3.02326	negative regulation of cell growth	12	CCN3,GREM1,SEMA5A,RGS4,MAP2,SPP1,RGS2,INHBA,ESR2,BST2,SEMA6D,TGFB2
0.00289426	0.0538831	4.60127	ovulation cycle	6	SERPINF1,MAP2K6,A2M,PGR,INHBA,TGFB2
0.00289572	0.0538831	3.54722	embryonic appendage morphogenesis	8	GREM1,NOG,ALX4,PBX1,BMP4,SHH,FREM2,TGFB2
0.00291645	0.0539083	5.61566	positive regulation of smooth muscle cell proliferation	9	PTGS2,PDGFB,EDN1,HBEGF,BMP4,CALCRL,IL18,MMP9,HPGD
0.00291918	0.0539083	3.23739	positive regulation of small molecule metabolic process	9	PTGS2,IRS2,ANXA1,NNMT,PPARGC1A,CLYBL,AVPR1A,IL1B,CD74
0.0029607	0.0539083	2.17877	negative regulation of response to external stimulus	18	CCN3,SERPINF1,GREM1,SEMA5A,PDGFB,EDN1,THBD,PLK2,FOXF1,SPP1,A2M,PLAT,CEACAM1,CALCRL,PTPRC,ACP5,SEMA6D,ADTRP
0.00296077	0.0539083	3.95461	positive regulation of lipid localization	7	PLA2G4A,EDN1,LPL,SPP1,MAP2K6,ATP8A1,IL1B
0.00296186	0.0539083	2.55741	chemotaxis	39	CCN3,SERPIND1,MTUS1,GREM1,SEMA5A,EFNB1,PDGFB,EDN1,VEGFA,ETV1,ANXA1,NOG,ADAM8,VAV3,LAMA2,SCG2,EPHB1,LHX1,HBEGF,BMP4,FES,CSF3R,UNC5C,ITGB2,CXCL3,EGR3,EPHA3,SHH,CXCR2,S100A8,UNC5B,ACKR3,LSP1,C3AR1,LPAR1,SEMA6D,TGFB2,IL1B,CD74
0.00297117	0.0539083	7.52619	response to amphetamine	4	RGS4,EDN1,RGS2,RGS7
0.00297117	0.0539083	7.52619	response to gonadotropin	4	EDN1,INHBA,PLAT,PAPPA
0.00297282	0.0539083	1.61661	positive regulation of protein metabolic process	48	PTGS2,RGCC,GREM1,CEMIP,IL24,IL11,SPHK1,LIMCH1,CSPG4,PDGFB,EDN1,VEGFA,SLC6A9,PLK2,NNMT,ADAM8,FZD8,MAP2K6,CRLF1,TGFA,LEPR,NTRK2,PTPN22,INHBA,CYFIP2,HBEGF,GPRC5B,PPARGC1A,BMP4,IL18,ADRB2,PYCARD,PROX1,PTPRC,CSF3,RASGRP1,MMP9,NKD1,NEDD9,S100A8,AFAP1L2,LAPTM5,PPP1R16B,BMP5,TGFB2,IL1B,CD74,ADTRP
0.00302018	0.0539295	5.56848	negative regulation of myeloid leukocyte differentiation	5	FSTL3,INHBA,GPR68,CEACAM1,MAFB
0.00302018	0.0539295	5.56848	macrophage differentiation	5	VEGFA,INHBA,BMP4,MMP9,TSPAN2
0.00302018	0.0539295	5.56848	regulation of bone remodeling	5	GREM1,SPP1,ADAM8,LEPR,PDK4
0.00302018	0.0539295	5.56848	digestive tract morphogenesis	5	STRA6,FOXF1,AGR2,BMP4,SHH
0.00302134	0.0539295	2.55108	muscle cell differentiation	22	CCN3,GREM1,ANKRD1,RGS4,DYSF,PDGFB,EDN1,VEGFA,FOXF1,DNER,RGS2,PGM5,AKAP6,BMP4,PROX1,SHH,ADGRB3,AVPR1A,ACTN2,SOX6,ASB2,ADGRB1
0.00310873	0.0548504	4.53023	regulation of coagulation	6	PDGFB,EDN1,THBD,PLAT,CEACAM1,ADTRP
0.00311147	0.0548504	12.2069	epithelial cell maturation	3	PGR,TFCP2L1,FOXA1
0.00311147	0.0548504	12.2069	positive regulation of granulocyte macrophage colony-stimulating factor production	3	IL18,RASGRP1,IL1B
0.00311147	0.0548504	12.2069	morphogenesis of an epithelial bud	3	NOG,BMP4,SHH
0.00316294	0.0555857	2.28268	regulation of GTPase activity	16	TBC1D4,IQGAP2,TGM2,RGS4,VAV3,NTRK2,SPRY1,ADRB1,RAPGEF4,PYCARD,EPHA3,RASGRP1,RASGRF1,NEDD9,GRHL3,RGS7
0.00335723	0.0586463	1.9527	negative regulation of cell population proliferation	32	CCN3,PTGS2,SERPINF1,APLN,RGCC,GREM1,IL24,CEBPB,NOG,BCHE,SCG2,TP53I11,EPHB1,DLL4,INHBA,DACH1,SPRY1,SFN,PPARGC1A,BMP4,CEACAM1,SPINT2,PROX1,SHH,WNK2,IFITM1,ACKR3,BMP5,TGFB2,IL1B,CNMD,ADGRB1
0.00335769	0.0586463	7.24704	positive regulation of smooth muscle contraction	4	PTGS2,SPHK1,EDN1,CHRM3
0.00343117	0.0597465	1.89203	cell junction organization	25	CDH6,GREM1,LIMCH1,VEGFA,ADGRL3,DNER,NTRK2,EPHB1,ITGB4,SLITRK2,GPC4,SLITRK5,CUX2,EPHA3,PPFIBP2,SDK2,ADGRB3,ABI3,ACTN2,CLSTN2,XIRP2,CDH11,TGFB2,IL1B,ADGRB1
0.0034628	0.0601134	1.69737	regulation of catalytic activity	82	TFPI2,PTGS2,SERPINF1,SERPIND1,RGCC,DEPTOR,GREM1,CEMIP,TBC1D4,IQGAP2,TGM2,RGS4,PDGFB,EDN1,VEGFA,IRS2,ANXA1,FRY,ADAM8,VAV3,FZD8,MAP2K6,TXNIP,TGFA,A2M,ARHGAP18,LEPR,NTRK2,SCG5,ARHGAP28,PTPN22,NCF2,EPHB1,RCAN2,RGS2,PINLYP,SLPI,CYFIP2,SPRY1,ADRB1,PARM1,HBEGF,SFN,GPRC5B,COL7A1,BMP4,CEACAM1,BST2,ZFYVE28,PKIB,SPINT2,PTPRB,RAPGEF4,ROR1,ITGB2,IL18,ADRB2,PYCARD,LGR5,PROX1,EPHA3,ALK,PTPRC,RASGRP1,MMP9,ADGRB3…
0.00348548	0.06013	2.75753	regulation of myeloid cell differentiation	11	CEBPB,FSTL3,INHBA,HOXB8,GPR68,FES,CEACAM1,CSF3R,CSF3,MAFB,CD74
0.00349544	0.06013	3.14486	response to nutrient	9	PTGS2,IGFBP2,LPL,SPP1,PHEX,A2M,BCHE,FES,CNR1
0.00349544	0.06013	3.14486	regulation of blood vessel endothelial cell migration	9	PTGS2,RGCC,PDGFB,VEGFA,PLK2,ANXA1,JCAD,DLL4,STAT5A
0.00357297	0.0612786	4.39452	ventricular septum development	6	STRA6,NOG,BMP4,PROX1,XIRP2,TGFB2
0.00359926	0.0613793	11.4632	tube formation	12	GREM1,TGM2,VEGFA,NOG,COBL,BMP4,SPINT2,PROX1,SHH,GRHL3,BMP5,TGFB2
0.0036004	0.0613793	5.3258	response to cold	5	PLAC8,LPL,ADRB1,ADRB2,RGS7
0.00364997	0.0620385	33.6889	striated muscle tissue development	20	GREM1,ANKRD1,RGS4,JPH2,EDN1,VEGFA,NOG,DLL4,RGS2,PGM5,AKAP6,BMP4,PROX1,SHH,ACTN2,SOX6,XIRP2,ASB2,BMP5,TGFB2
0.00369277	0.0624517	4.36192	response to glucocorticoid	10	PTGS2,SERPINF1,IGFBP2,EDN1,ANXA1,A2M,BCHE,PLAT,PAPPA,AVPR1A
0.00370608	0.0624517	2.24325	regulation of apoptotic signaling pathway	16	PTGS2,DEPTOR,NOG,SCG2,INHBA,G0S2,BMP4,PYCARD,PTPRC,MMP9,S100A8,UNC5B,ACKR3,BMP5,IL1B,CD74
0.00370718	0.0624517	2.90143	regulation of cation channel activity	10	JPH2,EDN1,SLC6A9,AKAP6,ADRB2,MMP9,KCNC1,RASGRF1,ACTN2,CACNG4
0.00377258	0.0628847	11.2673	venous blood vessel development	3	VEGFA,FOXF1,PROX1
0.00377706	0.0628847	6.98784	metanephros morphogenesis	4	GREM1,LHX1,BMP4,KIF26B
0.00377706	0.0628847	6.98784	positive regulation of cytosolic calcium ion concentration involved in phospholipase C-activating G protein-coupled signaling pathway	4	EDN1,GPR4,C3AR1,LPAR1
0.00377706	0.0628847	6.98784	positive regulation of p38MAPK cascade	4	SPHK1,VEGFA,BMP4,IL1B
0.00382351	0.0629491	4.32966	cellular response to vascular endothelial growth factor stimulus	6	SPHK1,VEGFA,ANXA1,JCAD,DLL4,EGR3
0.0038244	0.0629491	2.47695	regulation of kinase activity	41	RGCC,DEPTOR,GREM1,CEMIP,PDGFB,EDN1,VEGFA,IRS2,ADAM8,VAV3,FZD8,MAP2K6,TGFA,NTRK2,PTPN22,EPHB1,RGS2,SPRY1,HBEGF,SFN,GPRC5B,BMP4,CEACAM1,ZFYVE28,PKIB,PTPRB,ROR1,IL18,ADRB2,PYCARD,PROX1,EPHA3,ALK,PTPRC,RASGRP1,FABP4,NEDD9,AFAP1L2,TGFB2,IL1B,CD74
0.00385572	0.0629491	2.47411	regulation of transmembrane transporter activity	13	JPH2,EDN1,SLC6A9,AKAP6,TCAF2,ADRB2,MMP9,KCNC1,CHRM3,RASGRF1,ACTN2,WNK2,CACNG4
0.00389422	0.0629491	32.5659	mesangial cell differentiation	3	PDGFB,ACTA2,GPR4
0.00391359	0.0629491	32.4815	cerebellar Purkinje cell-granule cell precursor cell signaling involved in regulation of granule cell precursor cell proliferation	2	LHX1,SHH
0.00391359	0.0629491	32.4815	nitric oxide transport	2	HBA1,EDN1
0.00391359	0.0629491	32.4815	long-chain fatty acid catabolic process	2	ACADL,ADTRP
0.00391359	0.0629491	32.4815	embryonic retina morphogenesis in camera-type eye	2	LHX1,PROX1
0.00391359	0.0629491	32.4815	positive regulation of sarcomere organization	2	EDN1,PROX1
0.00391359	0.0629491	32.4815	lung vasculature development	2	STRA6,FOXF1
0.00391359	0.0629491	32.4815	salivary gland cavitation	2	TGM2,SHH
0.00391359	0.0629491	32.4815	mesenchyme migration	2	FOXF1,ACTA2
0.00399373	0.0639088	2.29277	regulation of anatomical structure size	24	PTGS2,DEPTOR,SEMA5A,IL7R,EDN1,VEGFA,MAP2,SPP1,VAV3,ARHGAP18,ARHGAP28,RGS2,CYFIP2,HRH2,ADRB1,C15orf62,ACTA2,ADRB2,PYCARD,CSF3,CHRM3,AVPR1A,ACTN2,SEMA6D
0.0039957	0.0639088	2.57227	extracellular matrix organization	17	RGCC,GREM1,SULF2,NTN4,FOXF1,ADAM8,SPINT2,MMP1,MMP3,LOXL4,MMP9,COL8A2,ADAMTS17,CSGALNACT1,MMP13,TGFB2,ADTRP
0.00402986	0.0642746	3.07283	positive regulation of cell growth	11	SEMA5A,SPHK1,EDN1,VEGFA,AKAP6,HBEGF,SFN,AVPR1A,S100A8,RIMS1,TGFB2
0.00415752	0.0661254	3.05744	positive regulation of NF-kappaB transcription factor activity	9	GREM1,SPHK1,ADAM8,ROR1,IL18,PYCARD,ALK,S100A8,IL1B
0.00421153	0.0666147	1.65835	cation transport	37	PTGS2,KCNK10,CEMIP,RGS4,PDGFB,JPH2,EDN1,SLC6A9,KCNK6,KCNA2,CDH23,PIEZO2,RGS2,ATP8A1,PLPP4,HOMER3,NALCN,SLC47A1,AKAP6,SYT12,ANO1,SCNN1A,CACNG6,CALCRL,ADRB2,KCNN3,KCNB2,PTPRC,MMP9,KCNC1,RASGRF1,ACTN2,WNK2,CACNG4,SNAP25,RGS7,CNR1
0.00421168	0.0666147	2.68444	regulation of T cell activation	20	ILDR2,EFNB1,CD70,IGFBP2,IL7R,ANXA1,CEBPB,ADAM8,PTPN22,BMP4,CEACAM1,IL18,PYCARD,EGR3,PTPRC,SHH,RASGRP1,LAPTM5,IL1B,CD74
0.00423053	0.0667276	6.74652	embryonic digestive tract development	4	STRA6,FOXF1,SHH,TGFB2
0.0042832	0.0673717	1.66118	movement of cell or subcellular component	86	CCN3,PTGS2,SERPINF1,MTUS1,RGCC,ITGBL1,GREM1,CEMIP,PRSS3,IL24,SEMA5A,EFNB1,LPXN,SPHK1,LIMCH1,CSPG4,PDGFB,EDN1,VEGFA,IRS2,ETV1,PLK2,MAP2,NTN4,ANXA1,JCAD,NOG,FOXF1,ADAM8,VAV3,LAMA2,ADGRL3,DNER,ARHGAP18,SCG2,NTRK2,EPHB1,DLL4,ATP8A1,ITGB4,DACH1,LHX1,GPC4,HBEGF,PLAT,BMP4,FES,CEACAM1,BST2,ARID5B,CSF3R,UNC5C,SPINT2,ACTA2,ITGB2,TCAF2,CXCL3,PYCARD,TSPAN11,PROX1,EGR3,EPHA3,PTPRC,SHH,RASGRP1,MMP9,ABI3,NEDD9,…
0.00440691	0.0689491	1.8539	negative regulation of signal transduction	47	CCN3,PTGS2,APLN,DEPTOR,LTBP1,GREM1,LPXN,SHISA3,IGFBP2,RGS4,SULF2,LFNG,NOG,SESN3,SCG2,PTPN22,FSTL3,DLL4,RGS2,HOMER3,SPRY1,BMP4,DKK2,CEACAM1,ZFYVE28,APCDD1L,ADRB2,PYCARD,PTPRC,SHH,MMP9,NKD1,DGKG,UNC5B,CXXC4,LAPTM5,WNK2,PDE3A,ACKR3,HTRA3,RGS7,LDLRAD4,BMP5,TGFB2,IL1B,CD74,CHRD
0.00440771	0.0689491	2.14262	response to xenobiotic stimulus	17	PTGS2,IGFBP2,ANKRD1,EDN1,NNMT,LPL,VAV3,MAP2K6,TXNIP,TGFA,BCHE,INHBA,KCNC1,GSTA4,PDE3A,TGFB2,IL1B
0.00451298	0.0698299	10.4619	pulmonary valve morphogenesis	3	STRA6,BMP4,TGFB2
0.00451298	0.0698299	10.4619	regulation of odontogenesis	3	EDN1,BMP4,SHH
0.00451298	0.0698299	10.4619	positive regulation of dendrite development	3	COBL,ALK,BMP5
0.00451306	0.0698299	1.74788	response to abiotic stimulus	40	PTGS2,SERPINF1,PLAC8,STRA6,RGCC,BMF,IGFBP2,ANKRD1,EDN1,THBD,VEGFA,ETV1,ANXA1,LPL,PLEKHN1,ADAM8,TXNIP,EPHB1,PIEZO2,PAPPA2,ADRB1,PLAT,GPR68,ANO1,SCNN1A,MMP1,ADRB2,MMP3,GPR4,PTPRC,MMP9,MAP7,KCNC1,AVPR1A,ALAS2,ST8SIA1,RGS7,GUCY1A2,TGFB2,IL1B
0.00464989	0.0717519	1.99521	negative regulation of protein modification process	20	DEPTOR,GREM1,FRY,NOG,PTPN22,RGS2,SPRY1,SFN,BMP4,CEACAM1,ZFYVE28,PKIB,PTPRB,PYCARD,PTPRC,FABP4,PPP1R16B,LDLRAD4,IL1B,ADGRB1
0.00472752	0.0727527	3.25278	skeletal system morphogenesis	13	GREM1,NOG,ALX4,PAPPA2,HOXB8,LHX1,BMP4,ARID5B,HOXB5,SOX6,CSGALNACT1,ACP5,MMP13
0.00475558	0.0728362	2.32176	positive regulation of phosphorylation	42	PTGS2,RGCC,GREM1,CEMIP,IL24,IL11,SPHK1,LIMCH1,CSPG4,PDGFB,EDN1,VEGFA,ADAM8,VAV3,FZD8,MAP2K6,CRLF1,TGFA,LEPR,NTRK2,EPHB1,INHBA,HBEGF,GPRC5B,BMP4,ROR1,IL18,ADRB2,PROX1,EPHA3,ALK,PTPRC,CSF3,RASGRP1,MMP9,NEDD9,AFAP1L2,BMP5,TGFB2,IL1B,CD74,ADTRP
0.00475853	0.0728362	2.51253	positive regulation of immune effector process	12	ANXA1,FOXF1,PTPN22,GPRC5B,FES,ITGB2,IL18,PTPRC,RASGRP1,LAPTM5,IL1B,CD74
0.00477451	0.0728849	4.95324	positive regulation of T cell proliferation	10	EFNB1,CD70,IGFBP2,ANXA1,PTPN22,IL18,PYCARD,PTPRC,SHH,IL1B
0.00509669	0.077595	2.61195	cell-cell adhesion	53	CCN3,PCDH7,CDH6,RGCC,ILDR2,EFNB1,CD70,IGFBP2,NCAM2,IL7R,VEGFA,ANXA1,CEBPB,FOXF1,ADAM8,ADGRL3,CDH23,PTPN22,FSTL3,PCDH18,SKAP1,TENM2,CYFIP2,SLITRK2,GPC4,BMP4,CEACAM1,GLDN,ITGA10,SPINT2,ITGB2,IL18,KIF26B,PYCARD,EGR3,PTPRC,SDK2,SHH,RASGRP1,FOXA1,ICAM5,COL8A2,S100A8,STXBP6,LAPTM5,PCDH10,CLSTN2,CDH11,BMP5,TGFB2,IL1B,CD74,ADTRP
0.00518056	0.0785885	3.54498	neural tube formation	7	NOG,COBL,BMP4,SPINT2,GRHL3,BMP5,TGFB2
0.0052249	0.0785885	2.16038	positive regulation of developmental process	62	PTGS2,SERPINF1,RGCC,GREM1,SEMA5A,SPHK1,TGM2,PDGFB,IL7R,EDN1,VEGFA,ANXA1,CEBPB,LPL,JCAD,NOG,ADAM8,ADM2,NTRK2,EPHB1,COBL,INHBA,SLITRK2,SPRY1,AKAP6,LHX1,AGR2,SFN,GPRC5B,GPR68,PPARGC1A,BMP4,FES,CEACAM1,SLITRK5,IL18,CUX2,ADRB2,PROX1,EGR3,ALK,PTPRC,CSF3,SHH,RASGRP1,FOXA1,ADGRB3,DMRT2,NEDD9,PTPRZ1,RIMS1,SCARF1,SOX6,CLSTN2,PDE3A,IFITM1,C3AR1,BMP5,TGFB2,IL1B,CD74,ADGRB1
0.00522839	0.0785885	2.48058	negative regulation of endopeptidase activity	12	TFPI2,PTGS2,SERPINF1,SERPIND1,VEGFA,A2M,SLPI,SFN,COL7A1,BST2,SPINT2,MMP9
0.00524476	0.0785885	6.31057	branching involved in blood vessel morphogenesis	4	EDN1,VEGFA,DLL4,SHH
0.00524476	0.0785885	6.31057	response to vitamin D	4	PTGS2,SPP1,PHEX,FES
0.00524476	0.0785885	6.31057	negative regulation of exocytosis	4	ANXA1,FOXF1,CEACAM1,STXBP6
0.00533238	0.0795259	3.18263	positive regulation of peptidyl-tyrosine phosphorylation	16	GREM1,IL24,IL11,CSPG4,PDGFB,VEGFA,CRLF1,TGFA,HBEGF,GPRC5B,IL18,PTPRC,CSF3,NEDD9,AFAP1L2,CD74
0.00533525	0.0795259	9.76393	negative regulation of vascular permeability	3	VEGFA,CEACAM1,PDE3A
0.00541202	0.0804596	2.73874	gastrulation	10	APLN,NOG,FOXF1,ITGB4,INHBA,LHX1,COL7A1,BMP4,ITGB2,MMP9
0.00545685	0.0809148	3.50862	vesicle fusion	7	TBC1D4,SPHK1,DYSF,ANXA1,VAV3,STXBP6,SNAP25
0.00549012	0.0811968	2.58415	positive regulation of ion transport	17	PLA2G4A,CEMIP,PDGFB,JPH2,EDN1,SLC6A9,CEBPB,MAP2K6,AKAP6,ADRB2,KCNC1,AVPR1A,ACTN2,WNK2,CACNG4,RGS7,IL1B
0.00560879	0.0827369	3.97731	vasculogenesis	6	VEGFA,FOXF1,NTRK2,CEACAM1,SHH,ACKR3
0.00574403	0.0830143	3.47299	feeding behavior	7	APLN,STRA6,ADM2,LEPR,NTRK2,DACH1,CNR1
0.00576302	0.0830143	24.4244	anterior/posterior axon guidance	3	LHX1,UNC5C,UNC5B
0.00578974	0.0830143	1.85895	endocytosis	23	APLN,GREM1,SPHK1,COLEC12,VEGFA,DNER,REPS2,NEURL1B,CEACAM1,ITGB2,CALCRL,ADRB2,PYCARD,EPHA3,LOXL4,SHH,CXCR2,SCARF1,CACNG4,SNAP25,ACKR3,MARCHF3,ADGRB1
0.00579208	0.0830143	24.3598	regulation of somitogenesis	2	LFNG,DMRT2
0.00579208	0.0830143	24.3598	interleukin-18-mediated signaling pathway	2	PDGFB,IL18
0.00579208	0.0830143	24.3598	atrial cardiac muscle tissue morphogenesis	2	NOG,PROX1
0.00579208	0.0830143	24.3598	ureteric bud formation	2	GREM1,NOG
0.00579208	0.0830143	24.3598	regulation of prostatic bud formation	2	BMP4,SHH
0.00579208	0.0830143	24.3598	cellular response to luteinizing hormone stimulus	2	EDN1,PLAT
0.00579208	0.0830143	24.3598	comma-shaped body morphogenesis	2	LHX1,BMP4
0.00579208	0.0830143	24.3598	motor neuron migration	2	VEGFA,LHX1
0.0058068	0.0830143	1.55118	reproduction	45	PTGS2,SERPINF1,SPOCD1,STRA6,IGFBP2,PDGFB,EDN1,THBD,VEGFA,NPR2,ANXA1,CEBPB,LFNG,NOG,SPP1,PAQR5,MAP2K6,A2M,LEPR,PGR,RGS2,ITGB4,INHBA,PBX1,DACH1,LHX1,PLAT,BMP4,ARID5B,SPINT2,DIAPH2,PAPPA,LGR5,SHH,FOXA1,MMP9,DMRT2,AVPR1A,RIMS1,HPGD,PDE3A,BMP5,CNR1,TGFB2,IL1B
0.00581713	0.0830143	4.70974	regulation of lymphocyte apoptotic process	5	IL7R,IRS2,ADAM8,BMP4,CD74
0.00597245	0.0850178	4.67568	dorsal/ventral pattern formation	10	GREM1,EDN1,NOG,DLL4,LHX1,BMP4,SHH,FOXA1,CXXC4,CHRD
0.00600454	0.0850861	2.87734	negative regulation of epithelial cell proliferation	9	SERPINF1,RGCC,SCG2,DLL4,SFN,BMP4,CEACAM1,TGFB2,CNMD
0.00600713	0.0850861	2.25596	enzyme linked receptor protein signaling pathway	53	CCN3,APLN,LTBP1,GREM1,EFNB1,LPXN,IGFBP2,CSPG4,PDGFB,VEGFA,IRS2,SULF2,NPR2,JCAD,NOG,SESN3,SH3TC2,TXNIP,TGFA,NTRK2,FSTL3,EPHB1,REPS2,INHBA,CYFIP2,DOK6,SPRY1,AGR2,HBEGF,PLAT,BMP4,FES,CEACAM1,ARID5B,ZFYVE28,ADRB2,ZNF423,EPHA3,ALK,SHH,MMP9,PDK4,NEDD9,AFAP1L2,HPGD,FAM83A,STAT5A,HTRA3,LDLRAD4,BMP5,TGFB2,IL1B,CHRD
0.00604236	0.0853728	3.43807	integrin-mediated signaling pathway	7	ITGBL1,VAV3,ITGB4,CEACAM1,ITGA10,ITGB2,NEDD9
0.00621233	0.0871883	3.09575	embryonic organ development	25	STRA6,PDGFB,EDN1,VEGFA,CEBPB,NOG,FOXF1,ALX4,ALDH1A3,A2M,CDH23,COBL,PBX1,HOXB8,LHX1,BMP4,SPINT2,PROX1,SHH,HOXB5,GRHL3,MAFB,ASB2,BMP5,TGFB2
0.00624174	0.0871883	9.15318	negative regulation of platelet activation	3	PDGFB,THBD,CEACAM1
0.00624174	0.0871883	9.15318	mammary gland alveolus development	3	VEGFA,FOXF1,TGFA
0.00626273	0.0871883	4.62063	negative regulation of BMP signaling pathway	5	GREM1,NOG,FSTL3,HTRA3,CHRD
0.00626273	0.0871883	4.62063	embryonic digit morphogenesis	5	NOG,ALX4,BMP4,SHH,FREM2
0.00626273	0.0871883	4.62063	maternal process involved in female pregnancy	5	PTGS2,SPP1,PGR,RGS2,CNR1
0.00630966	0.0876273	2.53238	axon guidance	14	SEMA5A,EFNB1,EDN1,VEGFA,ETV1,NOG,LAMA2,EPHB1,LHX1,UNC5C,EPHA3,SHH,UNC5B,SEMA6D
0.00640991	0.088803	5.92747	cardiac atrium development	4	NOG,DLL4,PROX1,TGFB2
0.00655916	0.0906501	2.16259	cellular response to hormone stimulus	26	SERPINF1,TBC1D4,IGFBP2,EDN1,IRS2,ANXA1,LPL,PHEX,SESN3,GAS2L1,LEPR,PGR,INHBA,ESR2,PLAT,BMP4,CEACAM1,NR5A2,LGR5,FOXA1,LMO2,PDK4,ACTN2,STAT5A,IL1B,ADTRP
0.00679116	0.0936292	2.6436	regulation of vasculature development	18	SERPINF1,RGCC,GREM1,SEMA5A,SPHK1,VEGFA,PLK2,JCAD,ADM2,CEACAM1,GPR4,ADGRB3,PPP1R16B,C3AR1,TGFB2,IL1B,CNMD,ADGRB1
0.00690663	0.0949911	3.03708	myeloid leukocyte activation	14	PLA2G4A,SPHK1,DYSF,ANXA1,FOXF1,FES,ITGB2,IL18,PYCARD,PTPRC,RASGRP1,CXCR2,CNR1,CD74
0.00700438	0.0958837	2.80388	regulation of production of molecular mediator of immune response	9	PTPN22,GPRC5B,BST2,IL18,PTPRC,LAPTM5,TGFB2,IL1B,CD74
0.0070052	0.0958837	8.71869	regulation of fatty acid biosynthetic process	8	PTGS2,ANXA1,CEACAM1,PDK4,AVPR1A,ACADL,IL1B,CD74
0.00705551	0.0963406	3.02564	regulation of nervous system process	8	CCN3,RGS4,EDN1,CUX2,ADRB2,AVPR1A,RIMS1,CACNG4
0.00718438	0.0978467	8.63673	axonal fasciculation	4	SEMA5A,NCAM2,EPHA3,CNR1
0.00722485	0.0978467	4.45212	negative regulation of MAP kinase activity	5	PTPN22,RGS2,SPRY1,BMP4,IL1B
0.00722485	0.0978467	4.45212	negative regulation of hormone secretion	5	CCN3,IL11,EDN1,INHBA,IL1B
0.00723454	0.0978467	8.61429	dorsal spinal cord development	3	HOXB8,LHX1,PROX1
0.00727318	0.0981362	2.7861	homophilic cell adhesion via plasma membrane adhesion molecules	9	PCDH7,CDH6,CDH23,PCDH18,CEACAM1,SDK2,PCDH10,CLSTN2,CDH11
0.00735854	0.0990533	3.00238	regulation of nuclear division	8	RGCC,SPHK1,PDGFB,EDN1,TGFA,BMP4,PDE3A,IL1B
0.00747022	0.100319	2.27088	positive regulation of cellular component biogenesis	22	RGCC,BMF,LIMCH1,VEGFA,NTRK2,SKAP1,EPHB1,COBL,TENM2,SLITRK2,C15orf62,FES,SLITRK5,CUX2,MMP1,MMP3,PYCARD,CSF3,ADGRB3,CLSTN2,LPAR1,ADGRB1
0.0075324	0.100912	1.4744	regulation of cellular process	291	CCN3,TFPI2,PTGS2,SERPINF1,SERPIND1,KCNK10,CDH6,PLAC8,MTUS1,APLN,SPOCD1,RGCC,DEPTOR,ITGBL1,LTBP1,GREM1,PLA2G4A,BMF,CEMIP,IL24,VIPR1,TBC1D4,SEMA5A,ILDR2,EFNB1,IL11,LPXN,EDIL3,SPHK1,SHISA3,IQGAP2,COLEC12,CD70,IGFBP2,ANKRD1,TGM2,RGS4,HBA1,DYSF,LIMCH1,CSPG4,PDGFB,JPH2,IL7R,EDN1,THBD,VEGFA,RTN1,SLC6A9,IRS2,SULF2,NPR2,ETV1,PLK2,MAP2,ANXA1,FRY,CEBPB,LMO7,DEPP1,FOXQ1,LFNG,NNMT,LPL,JCAD,NOG,CELF2,KCNK6,FOX…
0.0075498	0.100912	2.76853	central nervous system neuron differentiation	9	MAP2,NTRK2,EPHB1,DLL4,INHBA,LHX1,PROX1,SHH,CDH11
0.00771049	0.102819	3.27346	lipid oxidation	7	IRS2,ACOX2,PPARGC1A,SLC27A2,PDK4,CNR1,ACADL
0.00773499	0.102904	5.58815	cellular biogenic amine biosynthetic process	4	SMS,NNMT,MOXD1,TGFB2
0.00787821	0.103775	2.74842	positive regulation of supramolecular fiber organization	11	RGCC,SEMA5A,LIMCH1,EDN1,C15orf62,FES,PYCARD,PROX1,CSF3,ACTN2,LPAR1
0.00800093	0.103775	19.4868	xenobiotic transmembrane transport	2	ATP8B1,ABCC3
0.00800093	0.103775	19.4868	paracrine signaling	2	PDGFB,PGR
0.00800093	0.103775	19.4868	positive regulation of axon extension involved in axon guidance	2	SEMA5A,VEGFA
0.00800093	0.103775	19.4868	positive regulation of cell adhesion molecule production	2	COLEC12,IL1B
0.00800093	0.103775	19.4868	bud elongation involved in lung branching	2	SPRY1,BMP4
0.00800093	0.103775	19.4868	lung lobe morphogenesis	2	FOXF1,SHH
0.00800093	0.103775	19.4868	BMP signaling pathway involved in heart development	2	NOG,BMP4
0.00800093	0.103775	19.4868	negative regulation of monocyte chemotaxis	2	CCN3,GREM1
0.00800093	0.103775	19.4868	aminophospholipid translocation	2	ATP8B1,ATP8A1
0.00800093	0.103775	19.4868	dorsal root ganglion development	2	RGS4,UNC5C
0.00808123	0.104346	3.2424	cellular response to fibroblast growth factor stimulus	7	APLN,SULF2,NOG,DLL4,SPRY1,LHX1,EGR3
0.00808159	0.104346	2.9489	neurogenesis	75	SERPINF1,SEMA5A,EFNB1,TGM2,NCAM2,CSPG4,EDN1,VEGFA,ETV1,MAP2,NTN4,ANXA1,FRY,CEBPB,NOG,SPP1,ATP8B1,FZD8,LAMA2,ADGRL3,DNER,SH3TC2,CDH23,BCHE,NAV2,LEPR,NTRK2,GPRIN3,EPHB1,DLL4,COBL,RORB,RGS2,ITGB4,INHBA,TENM2,CYFIP2,DISP3,PBX1,SLITRK2,LHX1,GPRC5B,BMP4,FES,GLDN,UNC5C,ROR1,SLITRK5,CUX2,PROX1,EPHA3,ALK,SDK2,SHH,FOXA1,ADGRB3,DGKG,ABI3,RASGRF1,S100A8,PTPRZ1,UNC5B,RIMS1,SCARF1,TSPAN2,SOX6,SNAP25,CDH11,LPAR…
0.00825816	0.105624	8.15647	positive regulation of mesenchymal cell proliferation	4	IRS2,FOXF1,SHH,CHRD
0.00828556	0.105624	4.29544	extracellular matrix disassembly	5	ADAM8,MMP1,MMP3,MMP9,MMP13
0.0083155	0.105624	8.13528	regulation of complement activation	3	CFH,A2M,IL1B
0.0083155	0.105624	8.13528	cell proliferation involved in kidney development	3	PDGFB,BMP4,SHH
0.0083155	0.105624	8.13528	positive regulation of cardiocyte differentiation	3	GREM1,BMP4,TGFB2
0.00832666	0.105624	2.93468	limb morphogenesis	8	GREM1,NOG,ALX4,PBX1,BMP4,SHH,FREM2,TGFB2
0.00832666	0.105624	2.93468	digestive system development	8	STRA6,FOXF1,ALX4,COBL,AGR2,BMP4,SHH,TGFB2
0.00833377	0.105624	5.45722	embryo implantation	6	PTGS2,VEGFA,SPP1,ITGB4,MMP9,IL1B
0.0083651	0.105624	2.9318	embryonic organ morphogenesis	16	STRA6,EDN1,NOG,FOXF1,ALX4,ALDH1A3,CDH23,HOXB8,LHX1,BMP4,PROX1,SHH,HOXB5,GRHL3,MAFB,ASB2
0.00838466	0.105624	3.6322	post-embryonic development	6	VEGFA,ALX4,CDH23,LHX1,BMP4,ARID5B
0.00838466	0.105624	3.6322	transport across blood-brain barrier	6	SLC6A9,ABCG2,LEPR,ATP8A1,ABCC3,AVPR1A
0.00846493	0.1064	3.21192	hair cycle	7	PTGS2,FOXQ1,ALX4,INHBA,LGR5,SHH,TGFB2
0.00868049	0.108869	2.22554	regulation of cellular response to growth factor stimulus	15	APLN,LTBP1,GREM1,SULF2,JCAD,NOG,FSTL3,CYFIP2,SPRY1,BMP4,ZNF423,HTRA3,LDLRAD4,IL1B,CHRD
0.00873734	0.109342	2.70041	lipid homeostasis	9	IRS2,LPL,DISP3,ACOX2,IL18,TLCD4,NR5A2,FABP4,CYP39A1
0.00884928	0.1105	3.58771	mesenchymal cell development	6	SEMA5A,EFNB1,EDN1,BMP4,SHH,SEMA6D
0.00902314	0.112195	2.89121	positive regulation of Wnt signaling pathway	8	SEMA5A,SULF2,GPRC5B,DKK2,LGR5,SHH,NKD1,WNK2
0.00902443	0.112195	1.93707	response to extracellular stimulus	18	PTGS2,IGFBP2,LPL,SPP1,PHEX,SESN3,GAS2L1,A2M,BCHE,ADRB1,PPARGC1A,FES,ADRB2,PROX1,PTPRC,PDK4,AVPR1A,CNR1
0.0092284	0.114196	5.28551	neutrophil activation	4	ANXA1,ITGB2,IL18,CXCR2
0.0092284	0.114196	5.28551	semi-lunar valve development	4	STRA6,DLL4,BMP4,TGFB2
0.00933205	0.114196	3.54429	body fluid secretion	6	APLN,EDN1,VEGFA,AGR2,CHRM3,STAT5A
0.00933205	0.114196	3.54429	positive regulation of cell division	6	PDGFB,VEGFA,TGFA,SHH,TGFB2,IL1B
0.00936452	0.114196	7.74442	regulation of kidney development	5	GREM1,VEGFA,NOG,LHX1,BMP4
0.00938726	0.114196	2.86995	negative regulation of neuron apoptotic process	8	CEBPB,FOXQ1,ADAM8,CRLF1,NTRK2,PPARGC1A,PTPRZ1,UNC5B
0.00941356	0.114196	2.51055	embryo development	44	APLN,STRA6,GREM1,EFNB1,PDGFB,EDN1,VEGFA,SULF2,CEBPB,LFNG,NOG,FOXF1,ALX4,ALDH1A3,LAMA2,A2M,CDH23,DLL4,COBL,PLPP4,ITGB4,INHBA,PBX1,HOXB8,LHX1,COL7A1,BMP4,SPINT2,ITGB2,NR5A2,PROX1,SHH,FOXA1,MMP9,DMRT2,HOXB5,GRHL3,CXXC4,FREM2,MAFB,ASB2,BMP5,TGFB2,CHRD
0.00944957	0.114196	4.14938	positive chemotaxis	5	SEMA5A,PDGFB,VEGFA,SCG2,BMP4
0.00948626	0.114196	7.70669	ectoderm development	3	LHX1,SHH,GRHL3
0.00948626	0.114196	7.70669	cell differentiation in hindbrain	3	NOG,LHX1,PROX1
0.00948626	0.114196	7.70669	dorsal/ventral neural tube patterning	3	BMP4,SHH,FOXA1
0.00948626	0.114196	7.70669	negative regulation of organic acid transport	3	RGS4,IRS2,RGS2
0.00948626	0.114196	7.70669	branching involved in salivary gland morphogenesis	3	TGM2,NTN4,SHH
0.00948626	0.114196	7.70669	positive regulation of blood vessel endothelial cell proliferation involved in sprouting angiogenesis	3	VEGFA,JCAD,PPP1R16B
0.00948626	0.114196	7.70669	regulation of cardiac muscle cell differentiation	3	GREM1,BMP4,SOX6
0.00969647	0.11648	3.12381	endothelial cell differentiation	7	VEGFA,BMP4,CEACAM1,PROX1,HOXB5,PPP1R16B,IL1B
0.00982786	0.117628	1.88245	regulation of establishment of protein localization	19	CCN3,PTGS2,CEMIP,ANKRD1,IRS2,ADAM8,SH3TC2,SFN,GPR68,BMP4,ANO1,ITGB2,TCAF2,SHH,SNAP25,CNR1,TGFB2,IL1B,ADTRP
0.00983332	0.117628	3.50191	neural tube closure	6	NOG,COBL,BMP4,SPINT2,GRHL3,TGFB2
0.0099007	0.117716	2.26927	cellular response to organonitrogen compound	26	PTGS2,TBC1D4,TGM2,RGS4,EDN1,IRS2,CEBPB,LPL,SESN3,NTRK2,PTPN22,HRH2,AKAP6,PLAT,CEACAM1,ANO1,SCNN1A,ADRB2,GNAL,ALK,PDK4,CHRM3,ACTN2,PDE3A,STAT5A,IL1B
0.00990149	0.117716	3.11015	mesoderm development	9	MEST,VEGFA,NOG,FOXF1,ITGB4,INHBA,LHX1,BMP4,SHH
0.00990272	0.117716	7.55536	response to biotic stimulus	44	PTGS2,PLAC8,PRSS3,IL24,COLEC12,ANKRD1,IL7R,EDN1,THBD,ANXA1,CEBPB,LPL,ADAM8,CFH,TXNIP,A2M,PTPN22,NCF2,ZNF175,SLPI,DACH1,TRAC,FES,CEACAM1,BST2,ACTA2,IL18,CXCL3,PYCARD,PTPRC,CSF3,RASGRP1,FABP4,ABI3,S100A8,LAPTM5,CSF2RB,HPGD,IFITM1,ACP5,CNR1,IL1B,CD74,ADGRB1
0.0100407	0.11834	5.14614	collagen catabolic process	4	MMP1,MMP3,MMP9,MMP13
0.0100407	0.11834	5.14614	positive regulation of B cell proliferation	4	IRS2,VAV3,PTPRC,CD74
0.0100407	0.11834	5.14614	regulation of protein autophosphorylation	4	GREM1,PDGFB,VEGFA,PTPRC
0.0100407	0.11834	5.14614	regulation of actin cytoskeleton reorganization	4	IQGAP2,FES,CSF3,ABI3
0.0100615	0.11834	2.63554	appendage development	9	GREM1,NOG,ALX4,ITGB4,PBX1,BMP4,SHH,FREM2,TGFB2
0.0100825	0.11834	4.07681	T cell differentiation in thymus	11	IL7R,ADAM8,FZD8,BMP4,EGR3,PTPRC,SHH,RASGRP1,MAFB,IL1B,CD74
0.0101007	0.11834	2.63312	peptidyl-tyrosine phosphorylation	25	GREM1,IL24,IL11,CSPG4,PDGFB,VEGFA,MAP2K6,CRLF1,TGFA,NTRK2,EPHB1,HBEGF,GPRC5B,FES,ZFYVE28,ROR1,ITGB2,IL18,EPHA3,ALK,PTPRC,CSF3,NEDD9,AFAP1L2,CD74
0.0102529	0.119877	1.95003	muscle system process	17	PTGS2,SPHK1,RGS4,SYNM,EDN1,SULF2,SMTN,MAP2K6,RGS2,AKAP6,ACTA2,CALCRL,ADRB2,KCNB2,CHRM3,ACTN2,IL1B
0.0102851	0.120007	2.47467	regulation of synapse organization	10	NTRK2,EPHB1,SLITRK2,GPC4,SLITRK5,CUX2,ADGRB3,ABI3,CLSTN2,ADGRB1
0.0103535	0.120558	3.46052	cellular response to dopamine	6	TGM2,RGS4,HRH2,GNAL,ALK,CHRM3
0.0105261	0.120838	16.2381	pericardium morphogenesis	2	DLL4,BMP5
0.0105261	0.120838	16.2381	negative regulation of phospholipase activity	2	ANXA1,RGS2
0.0105261	0.120838	16.2381	positive regulation of ryanodine-sensitive calcium-release channel activity	2	JPH2,AKAP6
0.0105261	0.120838	16.2381	response to interleukin-18	2	PDGFB,IL18
0.0105261	0.120838	16.2381	S-shaped body morphogenesis	2	LHX1,BMP4
0.0105261	0.120838	16.2381	positive regulation of T-helper 1 cell cytokine production	2	IL18,IL1B
0.0105261	0.120838	16.2381	positive regulation of AMPA receptor activity	2	ADRB2,CACNG4
0.0105871	0.12095	3.06769	response to ethanol	7	RGS4,RGS2,CSF3,S100A8,HPGD,RGS7,CNR1
0.0105871	0.12095	3.06769	regulation of DNA biosynthetic process	7	RGCC,GREM1,ANKRD1,PDGFB,DACH1,PARM1,PKIB
0.0106156	0.12095	7.3556	positive regulation of epidermal growth factor receptor signaling pathway	5	TGFA,AGR2,HBEGF,MMP9,AFAP1L2
0.0106749	0.12095	7.34003	positive regulation of excitatory postsynaptic potential	4	RGS4,CUX2,ADRB2,RIMS1
0.010718	0.12095	5.03935	lung morphogenesis	6	NOG,FOXF1,SPRY1,BMP4,SHH,FOXA1
0.0107215	0.12095	4.0129	myofibril assembly	5	ANKRD1,EDN1,PGM5,PROX1,ACTN2
0.0107215	0.12095	4.0129	regulation of antigen receptor-mediated signaling pathway	5	LPXN,PTPN22,CEACAM1,PTPRC,LAPTM5
0.0107282	0.12095	2.09494	secretion	47	CCN3,APLN,RGCC,PLA2G4A,ILDR2,IL11,ANKRD1,EDN1,VEGFA,IRS2,ANXA1,FOXF1,SPP1,ADAM8,TNFAIP2,KCNA2,MAP2K6,SCG2,NTRK2,SCG5,SLC17A9,INHBA,ANK1,HRH2,AGR2,SYT12,GPR68,FES,CEACAM1,ANO1,RAPGEF4,LIN7A,ITGB2,RAB3C,RASGRP1,CHRM3,AVPR1A,S100A8,RIMS1,STXBP6,SNAP25,STAT5A,CNR1,TGFB2,IL1B,CD74,ADTRP
0.0107312	0.12095	1.71142	response to bacterium	25	PTGS2,PLAC8,IL24,COLEC12,ANKRD1,IL7R,EDN1,THBD,CEBPB,LPL,PTPN22,SLPI,TRAC,IL18,CXCL3,PYCARD,CSF3,FABP4,S100A8,CSF2RB,HPGD,ACP5,CNR1,IL1B,ADGRB1
0.0107482	0.12095	7.32095	positive regulation of alpha-beta T cell proliferation	3	PTPN22,IL18,PTPRC
0.0107777	0.121042	2.60425	regulation of cell size	9	DEPTOR,SEMA5A,IL7R,EDN1,VEGFA,MAP2,SPP1,VAV3,SEMA6D
0.0108929	0.121197	3.4201	columnar/cuboidal epithelial cell differentiation	6	CEBPB,AGR2,BMP4,PROX1,FOXA1,BMP5
0.0108929	0.121197	3.4201	cell-substrate junction assembly	6	GREM1,LIMCH1,VEGFA,ITGB4,EPHA3,ACTN2
0.0108929	0.121197	3.4201	molting cycle process	6	FOXQ1,ALX4,INHBA,LGR5,SHH,TGFB2
0.0108979	0.121197	5.01391	astrocyte development	4	ROR1,S100A8,TSPAN2,IL1B
0.0108979	0.121197	5.01391	superoxide anion generation	4	EDN1,NCF2,ITGB2,ACP5
0.010954	0.121347	2.78792	negative regulation of angiogenesis	8	SERPINF1,RGCC,PLK2,GPR4,ADGRB3,TGFB2,CNMD,ADGRB1
0.010954	0.121347	2.78792	retina development in camera-type eye	8	SERPINF1,NTRK2,DLL4,RORB,LHX1,PROX1,SDK2,TGFB2
0.0110718	0.122413	1.983	anatomical structure morphogenesis	129	CCN3,PTGS2,SERPINF1,CDH6,APLN,STRA6,RGCC,GREM1,SEMA5A,EFNB1,LPXN,SPHK1,ANKRD1,TGM2,CSPG4,IL7R,EDN1,VEGFA,ETV1,PLK2,MAP2,NTN4,ANXA1,FRY,CEBPB,FOXQ1,LFNG,JCAD,NOG,FOXF1,SPP1,ALX4,ATP8B1,ADAM8,VAV3,TNFAIP2,FZD8,PHEX,ALDH1A3,KCNA2,LAMA2,ADM2,TGFA,CDH23,ARHGAP18,SCG2,LEPR,NTRK2,PGR,EPHB1,DLL4,COBL,RORB,PAPPA2,ITGB4,INHBA,TFCP2L1,CYFIP2,PBX1,HOXB8,PGM5,SLITRK2,SPRY1,LHX1,GPC4,AGR2,HBEGF,C15orf62,COL7A1…
0.0111498	0.123037	2.58888	regulation of peptide secretion	9	CCN3,IRS2,GPR68,ANO1,S100A8,SNAP25,CNR1,IL1B,CD74
0.0112406	0.123799	2.43905	regulation of actin cytoskeleton organization	20	RGCC,SEMA5A,IQGAP2,RGS4,LIMCH1,EDN1,ARHGAP18,ARHGAP28,CYFIP2,C15orf62,FES,BST2,PYCARD,PROX1,EPHA3,CSF3,ABI3,GRHL3,ACTN2,LPAR1
0.0112625	0.123801	2.08175	response to organonitrogen compound	42	PTGS2,SERPINF1,TBC1D4,TGM2,RGS4,EDN1,THBD,IRS2,ANXA1,CEBPB,NNMT,LPL,PHEX,SESN3,BCHE,NTRK2,PTPN22,RGS2,HRH2,AKAP6,PLAT,CEACAM1,ANO1,SCNN1A,ITGB2,ADRB2,MMP3,GNAL,ALK,MMP9,PDK4,KCNC1,CHRM3,ACTN2,CACNG4,PDE3A,STAT5A,RGS7,MMP13,CNR1,IL1B,ADTRP
0.0113993	0.124822	3.94796	negative regulation of leukocyte mediated immunity	5	IL7R,FOXF1,CEACAM1,BST2,PTPRC
0.0113993	0.124822	3.94796	regulation of cardiac muscle tissue growth	5	RGS4,EDN1,NOG,RGS2,AKAP6
0.0114519	0.125029	3.3806	skin epidermis development	6	FOXQ1,ALX4,INHBA,LGR5,SHH,TGFB2
0.0114621	0.125029	2.0762	lipid localization	21	MEST,STRA6,PLA2G4A,EDN1,IRS2,ANXA1,LPL,SPP1,ATP8B1,MAP2K6,ABCG2,ATP8A1,INHBA,DISP3,ABCC3,CEACAM1,SLC27A2,FABP4,SLCO2A1,RBP7,IL1B
0.0115928	0.126213	2.13951	regulation of neuron death	13	SERPINF1,CEBPB,FOXQ1,ADAM8,CRLF1,NTRK2,EPHB1,PPARGC1A,ITGB2,CSF3,PTPRZ1,UNC5B,TGFB2
0.0118062	0.128291	2.74863	regulation of cell shape	8	VEGFA,ANXA1,ARHGAP18,C15orf62,FES,ITGB2,PALMD,LPAR1
0.0119593	0.129567	7.00381	metanephric nephron development	5	GREM1,PDGFB,LHX1,BMP4,KIF26B
0.0120324	0.129567	2.98718	positive regulation of cell-substrate adhesion	7	EDIL3,PDGFB,VEGFA,FOXF1,SKAP1,AGR2,NEDD9
0.0121027	0.129567	6.97196	natural killer cell differentiation	3	PBX1,PTPRC,RASGRP1
0.0121027	0.129567	6.97196	subpallium development	3	ALDH1A3,INHBA,FOXP2
0.0121027	0.129567	6.97196	negative regulation of fibroblast growth factor receptor signaling pathway	3	APLN,SULF2,SPRY1
0.0121027	0.129567	6.97196	positive regulation of neutrophil chemotaxis	3	EDN1,C3AR1,CD74
0.0121027	0.129567	6.97196	negative regulation of anion transport	3	RGS4,RGS2,TCAF2
0.0121056	0.129567	3.88508	positive regulation of cytokine production involved in immune response	5	GPRC5B,IL18,LAPTM5,IL1B,CD74
0.0121484	0.12978	4.8403	peptide secretion	13	CCN3,ILDR2,EDN1,IRS2,ANXA1,GPR68,ANO1,RAPGEF4,S100A8,SNAP25,CNR1,IL1B,CD74
0.0122147	0.130245	2.05874	negative regulation of proteolysis	14	TFPI2,PTGS2,SERPINF1,SERPIND1,VEGFA,A2M,SLPI,PLAT,SFN,COL7A1,BST2,SPINT2,SHH,MMP9
0.0122501	0.130378	2.72939	negative regulation of vasculature development	8	SERPINF1,RGCC,PLK2,GPR4,ADGRB3,TGFB2,CNMD,ADGRB1
0.012371	0.131419	1.9993	activation of immune response	15	RGCC,LPXN,VAV3,CFH,A2M,PTPN22,SKAP1,PLPP4,THEMIS2,CEACAM1,PYCARD,PTPRC,LAPTM5,C3AR1,IL1B
0.0125339	0.132274	1.39107	organic substance transport	64	CCN3,PTGS2,STRA6,PLA2G4A,CEMIP,ILDR2,ANKRD1,RGS4,EDN1,SLC6A9,IRS2,ANXA1,SPP1,ATP8B1,ADAM8,KCNA2,SH3TC2,MAP2K6,ABCG2,TXNIP,SCG2,NTRK2,SCG5,SLC16A6,RGS2,ATP8A1,NEURL1B,SLC17A9,INHBA,HOMER3,SLC47A1,DISP3,ABCC3,AKAP6,SYT12,SFN,GPR68,BMP4,CEACAM1,ANO1,SLC27A2,SLC14A1,RAPGEF4,LIN7A,ITGB2,CALCRL,TCAF2,RAB3C,SHH,FABP4,SLCO2A1,AVPR1A,S100A8,RIMS1,LAPTM5,CACNG4,SNAP25,RBP7,SLC2A12,CNR1,TGFB2,IL1B,CD74,ADTRP
0.0125444	0.132274	2.96126	hematopoietic progenitor cell differentiation	7	KRT75,FSTL3,INHBA,BMP4,PTPRC,SHH,PTPRZ1
0.0125444	0.132274	2.96126	response to estradiol	7	PTGS2,IGFBP2,ANXA1,TXNIP,ESR2,FOXA1,HPGD
0.0125444	0.132274	2.96126	ear morphogenesis	7	EDN1,NOG,ALDH1A3,CDH23,PROX1,GRHL3,MAFB
0.01263	0.13272	3.30427	neural crest cell differentiation	6	SEMA5A,EFNB1,EDN1,BMP4,SHH,SEMA6D
0.0126333	0.13272	14.3392	ear development	17	STRA6,EDN1,NOG,ATP8B1,ALDH1A3,CDH23,BMP4,LIN7A,ROR1,LGR5,PROX1,SHH,GRHL3,FREM2,MAFB,BMP5,TGFB2
0.0127507	0.133706	4.76881	regulation of neutrophil migration	4	EDN1,ADAM8,C3AR1,CD74
0.0128412	0.134407	3.82417	regulation of behavior	5	STRA6,KCNA2,LEPR,ADRB1,CNR1
0.0130719	0.136024	2.93579	regulation of leukocyte chemotaxis	7	CCN3,MTUS1,GREM1,EDN1,VEGFA,C3AR1,CD74
0.0131482	0.136024	14.0344	endoderm formation	6	NOG,INHBA,LHX1,COL7A1,ITGB2,MMP9
0.0131571	0.136024	3.27081	regulation of leukocyte cell-cell adhesion	23	ILDR2,EFNB1,CD70,IGFBP2,IL7R,ANXA1,CEBPB,ADAM8,PTPN22,SKAP1,BMP4,CEACAM1,ITGB2,IL18,PYCARD,EGR3,PTPRC,SHH,RASGRP1,LAPTM5,IL1B,CD74,ADTRP
0.0132897	0.136024	13.9538	embryonic camera-type eye formation	3	STRA6,ALDH1A3,PROX1
0.0133539	0.136024	13.9176	positive regulation of antigen processing and presentation	2	PYCARD,CD74
0.0133539	0.136024	13.9176	regulation of gamma-delta T cell differentiation	2	EGR3,PTPRC
0.0133539	0.136024	13.9176	retinal rod cell development	2	NTRK2,RORB
0.0133539	0.136024	13.9176	embryonic foregut morphogenesis	2	FOXF1,SHH
0.0133539	0.136024	13.9176	regulation of resting membrane potential	2	KCNK6,NALCN
0.0133539	0.136024	13.9176	ureteric bud elongation	2	BMP4,KIF26B
0.0133539	0.136024	13.9176	regulation of epithelial cell proliferation involved in prostate gland development	2	SERPINF1,SHH
0.0133539	0.136024	13.9176	positive regulation of cell growth involved in cardiac muscle cell development	2	EDN1,AKAP6
0.0133539	0.136024	13.9176	regulation of cardiac epithelial to mesenchymal transition	2	NOG,TGFB2
0.0133539	0.136024	13.9176	regulation of fibroblast growth factor production	2	PTGS2,RGCC
0.0133539	0.136024	13.9176	positive regulation of chemokine (C-X-C motif) ligand 2 production	2	LPL,CD74
0.0134002	0.136103	2.09686	anatomical structure homeostasis	13	PTGS2,ILDR2,VEGFA,SPP1,ADAM8,LAMA2,CDH23,SPATA7,CALB2,ADRB2,PDK4,ACP5,CNR1
0.0134697	0.136103	4.67636	positive regulation of cell adhesion	30	EFNB1,EDIL3,CD70,IGFBP2,TGM2,PDGFB,IL7R,VEGFA,ANXA1,FOXF1,ADAM8,VAV3,PTPN22,FSTL3,SKAP1,AGR2,ITGB2,IL18,KIF26B,PYCARD,EGR3,PTPRC,SHH,RASGRP1,FOXA1,NEDD9,TGFB2,IL1B,CD74,CHRD
0.0135506	0.136103	6.65469	negative regulation of myoblast differentiation	3	BMP4,IL18,MBNL3
0.0135506	0.136103	6.65469	negative regulation of T cell receptor signaling pathway	3	PTPN22,CEACAM1,LAPTM5
0.0135506	0.136103	6.65469	camera-type eye photoreceptor cell differentiation	3	NTRK2,RORB,SDK2
0.0135506	0.136103	6.65469	establishment of skin barrier	3	SFN,ALOXE3,GRHL3
0.0135506	0.136103	6.65469	regulation of anion transmembrane transport	3	RGS4,RGS2,TCAF2
0.0135529	0.136103	1.929	regulation of vesicle-mediated transport	22	APLN,GREM1,TBC1D4,SPHK1,TGM2,DYSF,VEGFA,ANXA1,FOXF1,SYT12,FES,CEACAM1,RAPGEF4,ITGB2,PYCARD,EPHA3,PTPRC,RAB3C,ACTN2,STXBP6,CNR1,IL1B
0.0137478	0.137093	4.65502	endodermal cell differentiation	4	INHBA,COL7A1,ITGB2,MMP9
0.0137478	0.137093	4.65502	negative regulation of T cell differentiation	4	ANXA1,BMP4,SHH,CD74
0.0137478	0.137093	4.65502	genitalia development	4	STRA6,LHX1,SHH,BMP5
0.0137478	0.137093	4.65502	positive regulation of vascular associated smooth muscle cell proliferation	4	PDGFB,EDN1,MMP9,HPGD
0.0138718	0.138088	2.24864	cellular response to transforming growth factor beta stimulus	11	LTBP1,LPXN,ANKRD1,EDN1,SPRY1,SOX6,HPGD,PDE3A,HTRA3,LDLRAD4,TGFB2
0.0141211	0.140324	1.84797	positive regulation of metabolic process	115	PTGS2,PLAC8,APLN,RGCC,GREM1,CEMIP,IL24,IL11,SPHK1,ANKRD1,LIMCH1,CSPG4,PDGFB,IL7R,EDN1,VEGFA,SLC6A9,IRS2,SULF2,ETV1,PLK2,ANXA1,CEBPB,LMO7,NNMT,LPL,NOG,FOXF1,SPP1,ALX4,PLEKHN1,ADAM8,VAV3,FZD8,SESN3,MAP2K6,ADM2,CRLF1,SSBP2,TGFA,LEPR,NTRK2,PTPN22,FSTL3,SKAP1,PGR,ZNF175,EPHB1,DLL4,RORB,INHBA,TFCP2L1,CYFIP2,DISP3,PBX1,ZNF845,LHX1,AGR2,ADRB1,ESR2,PARM1,HBEGF,G0S2,GPRC5B,PPARGC1A,BMP4,ARID5B,PKIB,EBF2,CS…
0.0141602	0.140467	6.52389	regulation of endothelial cell migration	16	PTGS2,SERPINF1,RGCC,SEMA5A,PDGFB,EDN1,VEGFA,PLK2,ANXA1,JCAD,DLL4,BMP4,CEACAM1,PROX1,STAT5A,ADGRB1
0.0144016	0.142373	3.70788	cardiac septum morphogenesis	5	NOG,BMP4,PROX1,BMP5,TGFB2
0.0144023	0.142373	4.5844	regulation of systemic arterial blood pressure	8	PDGFB,EDN1,KCNK6,ADM2,NAV2,ADRB1,ADRB2,AVPR1A
0.0145404	0.143273	4.57082	prostate gland development	6	SERPINF1,ANXA1,NOG,BMP4,SHH,FOXA1
0.014553	0.143273	3.196	cholesterol homeostasis	6	LPL,DISP3,IL18,NR5A2,FABP4,CYP39A1
0.0145688	0.143273	1.58948	regulation of immune system process	56	CCN3,MTUS1,RGCC,GREM1,PLA2G4A,ILDR2,EFNB1,LPXN,SPHK1,COLEC12,CD70,IGFBP2,IL7R,EDN1,VEGFA,IRS2,PLK2,ANXA1,CEBPB,FOXF1,ADAM8,VAV3,MAP2K6,CFH,A2M,PTPN22,FSTL3,SKAP1,PLPP4,INHBA,HOXB8,THEMIS2,GPRC5B,GPR68,BMP4,FES,CEACAM1,BST2,CSF3R,ITGB2,IL18,PYCARD,EGR3,PTPRC,CSF3,SHH,RASGRP1,LAPTM5,MAFB,C3AR1,BMP5,CNR1,TGFB2,IL1B,CD74,ADTRP
0.0147931	0.144978	4.54651	regulation of acute inflammatory response	4	PTGS2,ADAM8,CNR1,IL1B
0.0147931	0.144978	4.54651	response to cocaine	4	TGM2,RGS4,CACNG4,CNR1
0.0149032	0.145647	6.39617	monocyte differentiation	5	VEGFA,GPR68,BMP4,FES,CD74
0.0149485	0.145647	1.79751	negative regulation of intracellular signal transduction	19	CCN3,PTGS2,DEPTOR,SESN3,PTPN22,RGS2,HOMER3,SPRY1,BMP4,PYCARD,PTPRC,MMP9,DGKG,WNK2,PDE3A,ACKR3,TGFB2,IL1B,CD74
0.0149719	0.145647	2.45735	positive regulation of cytoskeleton organization	11	RGCC,SEMA5A,LIMCH1,EDN1,C15orf62,FES,PYCARD,PROX1,CSF3,ACTN2,LPAR1
0.0149874	0.145647	2.13581	cell activation involved in immune response	12	DYSF,ANXA1,LFNG,FOXF1,FES,CEACAM1,ITGB2,IL18,PYCARD,PTPRC,RASGRP1,CD74
0.0149893	0.145647	6.38194	axis elongation	4	SPRY1,BMP4,SHH,NKD1
0.0150927	0.145658	6.36501	vascular associated smooth muscle contraction	3	EDN1,ACTA2,CHRM3
0.0150927	0.145658	6.36501	Fc-gamma receptor signaling pathway involved in phagocytosis	3	VAV3,PLPP4,PTPRC
0.0150927	0.145658	6.36501	negative regulation of lipid catabolic process	3	ALK,CNR1,IL1B
0.0150927	0.145658	6.36501	positive regulation of release of cytochrome c from mitochondria	3	BMF,PYCARD,MMP9
0.0151753	0.146207	2.61935	regulation of actin polymerization or depolymerization	8	SEMA5A,ARHGAP18,ARHGAP28,CYFIP2,C15orf62,PYCARD,CSF3,ACTN2
0.0152275	0.146304	3.65234	cardiac ventricle morphogenesis	5	NOG,FOXF1,DLL4,PROX1,TGFB2
0.0152368	0.146304	3.16146	regulation of phagocytosis	6	SPHK1,TGM2,DYSF,PYCARD,PTPRC,IL1B
0.0156042	0.149274	1.99227	cellular response to peptide	14	TBC1D4,EDN1,IRS2,LPL,SESN3,PTPN22,PLAT,CEACAM1,ANO1,ADRB2,PDK4,ACTN2,STAT5A,IL1B
0.0157629	0.149274	1.58977	oxoacid metabolic process	29	PTGS2,PLA2G4A,FADS2,SMS,EDN1,IRS2,ANXA1,LPL,ATP8B1,ALDH1A3,ACOX2,PPARGC1A,CEACAM1,ALOXE3,SLC27A2,NR5A2,PROX1,PDK4,GGT5,AVPR1A,HPGD,CYP39A1,MAT1A,CSGALNACT1,CNR1,ACADL,IL1B,CD74,ADTRP
0.0158865	0.149274	12.418	regulation of epithelial to mesenchymal transition	11	RGCC,GREM1,NOG,SPRY1,BMP4,EPHA3,FOXA1,LDLRAD4,BMP5,TGFB2,IL1B
0.0158873	0.149274	4.44294	regulation of systemic arterial blood pressure mediated by a chemical signal	4	EDN1,ADRB1,ADRB2,AVPR1A
0.0158873	0.149274	4.44294	positive regulation of Notch signaling pathway	4	CCN3,LFNG,DLL4,TGFB2
0.0159643	0.149274	3.60309	myeloid leukocyte migration	19	CCN3,MTUS1,GREM1,PDGFB,EDN1,VEGFA,ANXA1,ADAM8,VAV3,SCG2,CSF3R,ITGB2,CXCL3,CXCR2,S100A8,C3AR1,TGFB2,IL1B,CD74
0.0160844	0.149274	3.59843	mesoderm formation	5	NOG,FOXF1,ITGB4,INHBA,BMP4
0.0160844	0.149274	3.59843	smooth muscle cell differentiation	5	PDGFB,VEGFA,FOXF1,BMP4,SHH
0.0160942	0.149274	1.7859	regulation of cellular component organization	82	CCN3,SERPINF1,APLN,RGCC,GREM1,BMF,TBC1D4,SEMA5A,SPHK1,IQGAP2,RGS4,LIMCH1,PDGFB,EDN1,VEGFA,PLK2,MAP2,ANXA1,SPP1,ATP8B1,GAS2L1,TGFA,ARHGAP18,NTRK2,ARHGAP28,SKAP1,EPHB1,COBL,PAPPA2,RGS2,ATP8A1,INHBA,TENM2,CYFIP2,SLITRK2,AKAP6,GPC4,ESR2,HBEGF,SFN,C15orf62,PPARGC1A,BMP4,FES,CEACAM1,BST2,PKIB,ROR1,SLITRK5,CUX2,MMP1,ADRB2,MMP3,PYCARD,PROX1,EPHA3,ALK,CSF3,MMP9,ADGRB3,DGKG,ABI3,GRHL3,AVPR1A,S100A8,ACTN2,R…
0.0163156	0.149274	6.15918	epithelial cell differentiation involved in kidney development	7	GREM1,PDGFB,LHX1,BMP4,ACTA2,GPR4,MMP9
0.0163271	0.149274	12.2354	response to lithium ion	4	PTGS2,IGFBP2,SHH,FABP4
0.0163723	0.149274	3.58022	fatty acid transport	9	PLA2G4A,EDN1,IRS2,ANXA1,MAP2K6,SLC27A2,FABP4,RBP7,IL1B
0.0164713	0.149274	12.1772	cardiac neural crest cell migration involved in outflow tract morphogenesis	2	EDN1,BMP4
0.0164713	0.149274	12.1772	regulation of extracellular matrix constituent secretion	2	RGCC,ADTRP
0.0164713	0.149274	12.1772	regulation of nitric oxide mediated signal transduction	2	VEGFA,GUCY1A2
0.0164713	0.149274	12.1772	regulation of cerebellar granule cell precursor proliferation	2	LHX1,SHH
0.0164713	0.149274	12.1772	floor plate development	2	COBL,CHRD
0.0164713	0.149274	12.1772	netrin-activated signaling pathway	2	UNC5C,UNC5B
0.0164713	0.149274	12.1772	positive regulation of monocyte differentiation	2	FES,CD74
0.0164713	0.149274	12.1772	trachea morphogenesis	2	BMP4,SHH
0.0164713	0.149274	12.1772	regulation of glomerular mesangial cell proliferation	2	PDGFB,BMP4
0.0164713	0.149274	12.1772	positive regulation of kidney development	2	NOG,BMP4
0.0164713	0.149274	12.1772	regulation of tetrapyrrole metabolic process	2	SLC6A9,CLYBL
0.0164713	0.149274	12.1772	negative regulation of cell-cell adhesion mediated by cadherin	2	RGCC,VEGFA
0.0166306	0.149274	2.78803	neuron development	52	SERPINF1,SEMA5A,EFNB1,NCAM2,EDN1,VEGFA,ETV1,MAP2,NTN4,FRY,NOG,SPP1,ATP8B1,LAMA2,CDH23,NTRK2,GPRIN3,EPHB1,COBL,RORB,RGS2,TENM2,CYFIP2,PBX1,SLITRK2,LHX1,FES,GLDN,UNC5C,ROR1,SLITRK5,CUX2,EPHA3,ALK,SHH,ADGRB3,DGKG,ABI3,RASGRF1,PTPRZ1,UNC5B,RIMS1,SCARF1,TSPAN2,SNAP25,CDH11,LPAR1,SEMA6D,BMP5,CNR1,TGFB2,ADGRB1
0.0166406	0.149274	4.37557	glomerulus development	7	PDGFB,SULF2,NOG,LHX1,BMP4,ACTA2,GPR4
0.0166707	0.149274	3.09457	regulation of organ growth	6	RGS4,EDN1,NOG,RGS2,AKAP6,PROX1
0.0166707	0.149274	3.09457	regulation of actomyosin structure organization	6	RGCC,LIMCH1,EDN1,ARHGAP28,PROX1,LPAR1
0.0167299	0.149274	6.09947	oocyte maturation	3	EDN1,NPR2,PDE3A
0.0167299	0.149274	6.09947	steroid catabolic process	3	SPP1,SCARF1,CYP39A1
0.0167299	0.149274	6.09947	adrenal gland development	3	STRA6,PBX1,ARID5B
0.0167299	0.149274	6.09947	negative regulation of amine transport	3	RGS4,RGS2,CNR1
0.0167663	0.149274	4.3653	neural crest cell migration	6	SEMA5A,EFNB1,EDN1,BMP4,SHH,SEMA6D
0.0169729	0.149274	3.54609	embryonic pattern specification	5	EFNB1,COBL,LHX1,SHH,CXXC4
0.0170311	0.149274	4.34397	positive regulation of pathway-restricted SMAD protein phosphorylation	4	INHBA,BMP4,BMP5,TGFB2
0.0172241	0.149274	2.55515	central nervous system development	43	SEMA5A,SPHK1,RGS4,IRS2,MAP2,NOG,ALDH1A3,ADGRL3,DNER,NAV2,NTRK2,PCDH18,EPHB1,DLL4,RGS2,INHBA,PBX1,HOXB8,LHX1,BMP4,UNC5C,ROR1,PROX1,ALK,SHH,PTCHD1,KCNC1,GRHL3,AVPR1A,S100A8,PTPRZ1,ACAN,TSPAN2,FOXP2,SOX6,ACKR3,MAFB,CDH11,RGS7,SEMA6D,BMP5,IL1B,CHRD
0.0174214	0.149274	3.06217	negative regulation of small molecule metabolic process	6	LEPR,CEACAM1,PROX1,BMP5,CNR1,ACADL
0.0174273	0.149274	2.39113	positive regulation of protein-containing complex assembly	9	BMF,VEGFA,SKAP1,C15orf62,FES,MMP1,MMP3,PYCARD,CSF3
0.0174321	0.149274	1.91459	cell migration	79	CCN3,PTGS2,SERPINF1,MTUS1,RGCC,ITGBL1,GREM1,CEMIP,PRSS3,IL24,SEMA5A,EFNB1,LPXN,SPHK1,LIMCH1,CSPG4,PDGFB,EDN1,VEGFA,IRS2,PLK2,NTN4,ANXA1,JCAD,NOG,FOXF1,ADAM8,VAV3,LAMA2,ADGRL3,DNER,SCG2,NTRK2,EPHB1,DLL4,ATP8A1,ITGB4,DACH1,LHX1,GPC4,HBEGF,PLAT,BMP4,CEACAM1,BST2,ARID5B,CSF3R,UNC5C,ACTA2,ITGB2,TCAF2,CXCL3,PYCARD,TSPAN11,PROX1,EGR3,EPHA3,PTPRC,SHH,MMP9,ABI3,NEDD9,CXCR2,S100A8,STAT5A,IFITM1,ACKR3,C3AR1…
0.0174595	0.149274	1.61766	cytokine production	26	PTGS2,RGCC,LTBP1,SPHK1,SULF2,ANXA1,CEBPB,LPL,ADAM8,PTPN22,INHBA,HOMER3,GPRC5B,CEACAM1,BST2,IL18,PYCARD,PTPRC,RASGRP1,AFAP1L2,LAPTM5,C3AR1,ACP5,TGFB2,IL1B,CD74
0.0176417	0.149274	4.29289	ureteric bud morphogenesis	8	GREM1,VEGFA,NOG,PBX1,LHX1,BMP4,KIF26B,SHH
0.0178558	0.149274	4.27366	connective tissue development	18	CCN3,GREM1,PDGFB,EDN1,SULF2,NOG,PPARGC1A,BMP4,ARID5B,EBF2,ACTA2,GPR4,FOXA1,SOX6,CSGALNACT1,BMP5,MMP13,CNMD
0.0179089	0.149274	1.27488	regulation of primary metabolic process	145	TFPI2,PTGS2,SERPINF1,SERPIND1,PLAC8,APLN,RGCC,DEPTOR,GREM1,CEMIP,IL24,ILDR2,IL11,LPXN,SPHK1,ANKRD1,LIMCH1,CSPG4,PDGFB,IL7R,EDN1,VEGFA,RTN1,SLC6A9,IRS2,ETV1,PLK2,ANXA1,FRY,CEBPB,LMO7,FOXQ1,NNMT,NOG,CELF2,FOXF1,SPP1,ALX4,PLEKHN1,ATP8B1,ADAM8,VAV3,FZD8,MAP2K6,CRLF1,SSBP2,TXNIP,TGFA,A2M,LEPR,NTRK2,PTPN22,FSTL3,SKAP1,PGR,ZNF175,DLL4,RORB,RGS2,HR,INHBA,TENM2,SLPI,TFCP2L1,CYFIP2,DISP3,PBX1,HOXB8,ZNF845,…
0.0179753	0.149274	2.53417	membrane fusion	8	TBC1D4,SPHK1,DYSF,ANXA1,VAV3,RIMS1,STXBP6,SNAP25
0.017977	0.149274	1.68659	negative regulation of apoptotic process	35	PTGS2,PLAC8,GREM1,SEMA5A,SPHK1,IL7R,EDN1,VEGFA,IRS2,PLK2,ANXA1,CEBPB,FOXQ1,NOG,ADAM8,CRLF1,TGFA,SCG2,NTRK2,SFN,PPARGC1A,BMP4,HMGN5,EGR3,SHH,MMP9,GRIA4,PDK4,PTPRZ1,UNC5B,PDE3A,ACKR3,BMP5,IL1B,CD74
0.0180734	0.149274	1.82409	epithelium development	56	KRT8,STRA6,GREM1,TGM2,PDGFB,EDN1,VEGFA,NTN4,ANXA1,CEBPB,FOXQ1,LFNG,NOG,FOXF1,KRT75,ALX4,ALDH1A3,CRLF1,TXNIP,CDH23,PGR,DLL4,COBL,INHBA,TFCP2L1,PBX1,SPRY1,LHX1,GPC4,AGR2,HBEGF,SFN,BMP4,CEACAM1,SPINT2,ROR1,ACTA2,KIF26B,NR5A2,GPR4,LGR5,PROX1,SHH,FOXA1,MMP9,NKD1,DMRT2,HOXB5,GRHL3,FREM2,PPP1R16B,ASB2,BMP5,TGFB2,IL1B,CHRD
0.0181036	0.149274	3.03352	positive regulation of cation transmembrane transport	11	CEMIP,JPH2,EDN1,SLC6A9,AKAP6,ADRB2,KCNC1,ACTN2,WNK2,CACNG4,RGS7
0.018225	0.149274	4.24931	negative regulation of leukocyte apoptotic process	4	IL7R,IRS2,BMP4,CD74
0.018225	0.149274	4.24931	positive regulation of extrinsic apoptotic signaling pathway	4	INHBA,G0S2,PYCARD,PTPRC
0.0182318	0.149274	2.15359	modulation of chemical synaptic transmission	22	PTGS2,RGS4,EDN1,PLK2,LAMA2,BCHE,NTRK2,EPHB1,SYT12,PLAT,CALB2,CUX2,ADRB2,RASGRF1,RIMS1,CACNG4,SNAP25,CLSTN2,CDH11,CNR1,IL1B,ADGRB1
0.0183891	0.149274	4.22341	blood vessel morphogenesis	50	CCN3,PTGS2,SERPINF1,APLN,STRA6,RGCC,GREM1,SEMA5A,SPHK1,CSPG4,EDN1,VEGFA,PLK2,ANXA1,JCAD,NOG,FOXF1,ADAM8,VAV3,TNFAIP2,FZD8,ADM2,TGFA,SCG2,LEPR,NTRK2,EPHB1,DLL4,BMP4,CEACAM1,PTPRB,THSD7A,CALCRL,IL18,GPR4,PROX1,EGR3,SHH,ADGRB3,COL8A2,UNC5B,HPGD,PPP1R16B,ACKR3,C3AR1,TGFB2,IL1B,ADTRP,CNMD,ADGRB1
0.0184625	0.149274	5.85517	endochondral ossification	3	BMP4,CSGALNACT1,MMP13
0.0184625	0.149274	5.85517	endocardial cushion formation	3	NOG,BMP5,TGFB2
0.0184625	0.149274	5.85517	myelination in peripheral nervous system	3	SH3TC2,NTRK2,ITGB4
0.0184625	0.149274	5.85517	sleep	3	KCNA2,ADRB1,IL18
0.0184625	0.149274	5.85517	negative regulation of cell killing	3	IL7R,CEACAM1,PTPRC
0.0184625	0.149274	5.85517	negative regulation of interleukin-2 production	3	HOMER3,PTPRC,LAPTM5
0.0184625	0.149274	5.85517	embryonic hindlimb morphogenesis	3	ALX4,BMP4,SHH
0.0184625	0.149274	5.85517	positive regulation of activated T cell proliferation	3	IGFBP2,IL18,PYCARD
0.0184625	0.149274	5.85517	positive regulation of protein targeting to membrane	3	CEMIP,ITGB2,TCAF2
0.0184996	0.149274	2.36529	regulation of protein binding	9	PDGFB,MAP2,LFNG,NOG,SLPI,BMP4,ADRB2,CSF3,MMP9
0.0185554	0.149274	2.51822	cartilage development	11	CCN3,GREM1,EDN1,SULF2,NOG,BMP4,SOX6,CSGALNACT1,BMP5,MMP13,CNMD
0.0187033	0.149274	1.85551	cell development	90	SERPINF1,SEMA5A,EFNB1,LPXN,ANKRD1,TGM2,NCAM2,RGS4,DYSF,PDGFB,EDN1,VEGFA,SULF2,NPR2,ETV1,MAP2,NTN4,FRY,NOG,SPP1,ATP8B1,PAQR5,LAMA2,DNER,SH3TC2,CDH23,NTRK2,GPRIN3,PGR,EPHB1,DLL4,COBL,RORB,RGS2,ITGB4,TENM2,TFCP2L1,CYFIP2,PBX1,PGM5,SLITRK2,SPRY1,AKAP6,LHX1,SFN,GPR68,BMP4,FES,ARID5B,GLDN,UNC5C,SPINT2,ROR1,ACTA2,SLITRK5,DIAPH2,CUX2,GPR4,LGR5,PROX1,EPHA3,ALK,PTPRC,SHH,FOXA1,ADGRB3,DGKG,ABI3,RASGRF1,NEDD…
0.0188461	0.149274	3.44582	fatty acid beta-oxidation	5	IRS2,ACOX2,SLC27A2,CNR1,ACADL
0.0189917	0.149274	2.99935	negative regulation of ion transmembrane transport	6	RGS4,SLC6A9,RGS2,TCAF2,MMP9,ACTN2
0.0192342	0.149274	4.16901	cell chemotaxis	25	CCN3,MTUS1,GREM1,SEMA5A,PDGFB,EDN1,VEGFA,ANXA1,ADAM8,VAV3,SCG2,EPHB1,HBEGF,CSF3R,ITGB2,CXCL3,EGR3,CXCR2,S100A8,ACKR3,C3AR1,LPAR1,TGFB2,IL1B,CD74
0.0192521	0.149274	2.70315	positive regulation of stress-activated protein kinase signaling cascade	7	SPHK1,VEGFA,BMP4,PYCARD,RASGRP1,TGFB2,IL1B
0.0192577	0.149274	2.98897	endocrine system development	9	STRA6,EDN1,ANXA1,NOG,PBX1,BMP4,ARID5B,SHH,BMP5
0.0194696	0.149274	4.15867	cell differentiation in spinal cord	4	DLL4,LHX1,SHH,SOX6
0.0194696	0.149274	4.15867	negative regulation of osteoblast differentiation	4	GREM1,NOG,RORB,CHRD
0.019619	0.149274	2.34001	positive regulation of intracellular transport	9	PTGS2,CEMIP,MAP2,SFN,ITGB2,TCAF2,SHH,ACTN2,IL1B
0.019619	0.149274	2.34001	regulation of stress-activated MAPK cascade	9	SPHK1,VEGFA,PTPN22,EPHB1,BMP4,PYCARD,RASGRP1,TGFB2,IL1B
0.0197072	0.149274	1.98464	B cell activation	13	IL11,CD70,IL7R,IRS2,LFNG,VAV3,INHBA,THEMIS2,BST2,PTPRC,RASGRP1,LAPTM5,CD74
0.0198317	0.149274	3.39778	positive regulation of interferon-gamma production	5	PTPN22,IL18,PYCARD,RASGRP1,IL1B
0.0198653	0.149274	10.8236	defense response to tumor cell	2	ABI3,LAPTM5
0.0198653	0.149274	10.8236	cGMP biosynthetic process	2	NPR2,GUCY1A2
0.0198653	0.149274	10.8236	cholesterol catabolic process	2	SCARF1,CYP39A1
0.0198653	0.149274	10.8236	lipoxygenase pathway	2	ALOXE3,HPGD
0.0198653	0.149274	10.8236	sequestering of extracellular ligand from receptor	2	LTBP1,GREM1
0.0198653	0.149274	10.8236	penile erection	2	AVPR1A,CNR1
0.0198653	0.149274	10.8236	maintenance of epithelial cell apical/basal polarity	2	ANK1,LIN7A
0.0198653	0.149274	10.8236	regulation of T-helper 2 cell differentiation	2	ANXA1,IL18
0.0198653	0.149274	10.8236	regulation of neurotrophin TRK receptor signaling pathway	2	CYFIP2,SPRY1
0.0198653	0.149274	10.8236	regulation of dopamine receptor signaling pathway	2	RGS4,ALK
0.0198653	0.149274	10.8236	embryonic skeletal joint morphogenesis	2	NOG,BMP4
0.0198653	0.149274	10.8236	bronchus development	2	AGR2,BMP4
0.0198653	0.149274	10.8236	regulation of thymocyte apoptotic process	2	ADAM8,BMP4
0.0198653	0.149274	10.8236	metanephric collecting duct development	2	BMP4,SHH
0.0199266	0.149274	5.66989	negative regulation of blood coagulation	6	PDGFB,EDN1,THBD,PLAT,CEACAM1,ADTRP
0.0202909	0.149274	5.62967	response to acidic pH	3	SERPINF1,SCNN1A,GPR4
0.0202909	0.149274	5.62967	negative regulation of heart growth	3	RGS4,NOG,RGS2
0.0202912	0.149274	2.32535	developmental growth involved in morphogenesis	15	SEMA5A,EDN1,VEGFA,MAP2,SPP1,COBL,CYFIP2,SPRY1,LHX1,BMP4,KIF26B,SHH,NKD1,RIMS1,SEMA6D
0.0206936	0.152038	3.35435	skeletal system development	33	CCN3,GREM1,TGM2,EDN1,SULF2,NPR2,NOG,ALX4,PHEX,MAP2K6,LEPR,PAPPA2,PBX1,HOXB8,LHX1,GPR68,BMP4,ARID5B,PTPRC,SHH,MMP9,DMRT2,HOXB5,ACAN,SOX6,CSGALNACT1,CDH11,ACP5,BMP5,MMP13,TGFB2,CHRD,CNMD
0.0207655	0.15237	4.07181	ephrin receptor signaling pathway	4	EFNB1,EPHB1,EPHA3,MMP9
0.0208034	0.152451	4.03982	multicellular organism development	182	CCN3,PTGS2,SERPINF1,CDH6,APLN,STRA6,RGCC,GREM1,SEMA5A,EFNB1,IL11,SPHK1,ANKRD1,TGM2,NCAM2,RGS4,CSPG4,PDGFB,JPH2,IL7R,EDN1,VEGFA,IRS2,SULF2,NPR2,ETV1,PLK2,MAP2,NTN4,ANXA1,FRY,CEBPB,LFNG,JCAD,NOG,FOXF1,SPP1,KRT75,ALX4,ATP8B1,ADAM8,VAV3,TNFAIP2,FZD8,PHEX,ALDH1A3,KCNA2,LAMA2,ADGRL3,DNER,SH3TC2,MAP2K6,ADM2,CRLF1,TGFA,A2M,CDH23,BCHE,NAV2,SCG2,LEPR,NTRK2,GPRIN3,PTPN22,FSTL3,PCDH18,PGR,EPHB1,DLL4,COBL,ROR…
0.0210214	0.15385	3.34276	response to carbohydrate	12	PTGS2,SERPINF1,ILDR2,COLEC12,IRS2,LPL,MAP2K6,TXNIP,GPR68,ANO1,CALCRL,IL1B
0.021072	0.154023	2.19546	regulated exocytosis	10	FOXF1,SYT12,FES,CEACAM1,RAPGEF4,ITGB2,RASGRP1,RIMS1,SNAP25,CNR1
0.0212335	0.155004	3.33358	negative regulation of T cell activation	9	ILDR2,ANXA1,CEBPB,PTPN22,BMP4,CEACAM1,SHH,LAPTM5,CD74
0.0213631	0.155751	4.03257	negative regulation of leukocyte differentiation	9	ANXA1,FSTL3,INHBA,GPR68,BMP4,CEACAM1,SHH,MAFB,CD74
0.0214481	0.15617	2.64034	hepaticobiliary system development	7	ANXA1,CEBPB,TGFA,COBL,CEACAM1,ARID5B,PROX1
0.021629	0.157287	2.18559	cell-matrix adhesion	10	ITGBL1,GREM1,LIMCH1,VEGFA,SKAP1,ITGB4,ITGA10,ITGB2,EPHA3,ACTN2
0.0218026	0.158347	2.43892	actin filament polymerization	8	ARHGAP18,ARHGAP28,COBL,CYFIP2,C15orf62,DIAPH2,PYCARD,CSF3
0.0219368	0.159119	2.09048	growth	46	CCN3,PLAC8,STRA6,GREM1,SEMA5A,SPHK1,IGFBP2,RGS4,EDN1,VEGFA,MAP2,ANXA1,NOG,SPP1,LEPR,COBL,PAPPA2,RGS2,INHBA,TFCP2L1,CYFIP2,SPRY1,AKAP6,LHX1,AGR2,ADRB1,ESR2,HBEGF,SFN,BMP4,CEACAM1,BST2,ARID5B,KIF26B,ADRB2,PROX1,SHH,NKD1,NEDD9,AVPR1A,S100A8,RIMS1,STAT5A,SEMA6D,MMP13,TGFB2
0.0220065	0.159313	2.4342	regulation of hormone secretion	13	CCN3,IL11,EDN1,IRS2,ANXA1,SPP1,SCG5,INHBA,GPR68,ANO1,SNAP25,CNR1,IL1B
0.0221132	0.159313	3.98849	positive regulation of epithelial to mesenchymal transition	4	RGCC,BMP4,TGFB2,IL1B
0.0221132	0.159313	3.98849	amino acid import	4	RGS4,SLC6A9,RGS2,SLC47A1
0.0221132	0.159313	3.98849	Wnt signaling pathway, planar cell polarity pathway	4	GPC4,ROR1,NKD1,GRHL3
0.0221132	0.159313	3.98849	cellular response to glucocorticoid stimulus	4	SERPINF1,EDN1,ANXA1,PLAT
0.0222154	0.159313	5.42087	activation of adenylate cyclase activity	3	ADRB1,ADRB2,LGR5
0.0222154	0.159313	5.42087	hair follicle morphogenesis	3	FOXQ1,SHH,TGFB2
0.0222154	0.159313	5.42087	face morphogenesis	3	STRA6,NOG,ARID5B
0.0222154	0.159313	5.42087	negative regulation of cartilage development	3	GREM1,NOG,BMP4
0.0223096	0.159787	2.08478	positive regulation of intracellular signal transduction	47	GREM1,SEMA5A,IL11,SPHK1,ANKRD1,TGM2,CSPG4,PDGFB,EDN1,VEGFA,NPR2,PLK2,JCAD,ADAM8,LURAP1L,FZD8,MAP2K6,TGFA,NTRK2,PTPN22,DOK6,AKAP6,HBEGF,GPRC5B,BMP4,BST2,ROR1,ACTA2,IL18,ADRB2,PYCARD,GPR4,PROX1,ALK,PTPRC,CSF3,RASGRP1,RASGRF1,S100A8,UNC5B,LAPTM5,ACKR3,LPAR1,GUCY1A2,TGFB2,IL1B,CD74
0.0224168	0.160152	2.88109	polysaccharide metabolic process	6	PDGFB,IRS2,LEPR,GYG2,CSGALNACT1,CHST1
0.0224168	0.160152	2.88109	response to catecholamine	6	TGM2,RGS4,HRH2,GNAL,ALK,CHRM3
0.0224924	0.160469	2.42374	regulation of muscle contraction	8	PTGS2,SPHK1,EDN1,RGS2,CALCRL,ADRB2,KCNB2,CHRM3
0.0225175	0.160469	1.27878	regulation of biosynthetic process	101	PTGS2,PLAC8,APLN,RGCC,GREM1,IL11,LPXN,SPHK1,ANKRD1,PDGFB,EDN1,VEGFA,SLC6A9,IRS2,ETV1,ANXA1,CEBPB,LMO7,FOXQ1,NNMT,NOG,FOXF1,SPP1,ALX4,PLEKHN1,ATP8B1,ADAM8,MAP2K6,SSBP2,TXNIP,LEPR,FSTL3,SKAP1,PGR,ZNF175,DLL4,RORB,RGS2,HR,INHBA,TENM2,TFCP2L1,PBX1,HOXB8,ZNF845,DACH1,LHX1,ZNF160,ESR2,PARM1,HBEGF,PPARGC1A,BMP4,CEACAM1,ARID5B,PKIB,EBF2,CSRNP3,HMGN5,ZNF100,ROR1,IL18,ZNF483,CUX2,ADRB2,PYCARD,NR5A2,ZNF813,…
0.022631	0.161076	2.27907	cellular response to steroid hormone stimulus	9	SERPINF1,EDN1,ANXA1,PGR,ESR2,PLAT,BMP4,FOXA1,ADTRP
0.0229891	0.163217	3.26133	outflow tract morphogenesis	5	EDN1,VEGFA,NOG,BMP4,TGFB2
0.0229891	0.163217	3.26133	aminoglycan biosynthetic process	5	CEMIP,PDGFB,CSGALNACT1,CHST1,IL1B
0.02314	0.163545	3.92856	cardiac muscle tissue morphogenesis	6	ANKRD1,NOG,DLL4,PROX1,XIRP2,TGFB2
0.0233568	0.163545	2.85187	kidney epithelium development	10	GREM1,VEGFA,NOG,CRLF1,PBX1,SPRY1,LHX1,BMP4,KIF26B,SHH
0.0233641	0.163545	2.15647	import into cell	10	RGS4,SLC6A9,IRS2,RGS2,NEURL1B,SLC47A1,SCNN1A,SLC27A2,WNK2,SNAP25
0.0235131	0.163545	3.90851	glial cell activation	4	SPHK1,ITGB2,PTPRC,IL1B
0.0235236	0.163545	9.74074	luteinization	2	A2M,INHBA
0.0235236	0.163545	9.74074	diet induced thermogenesis	2	ADRB1,ADRB2
0.0235236	0.163545	9.74074	mesenchymal to epithelial transition involved in metanephros morphogenesis	2	GREM1,BMP4
0.0235236	0.163545	9.74074	thalamus development	2	SHH,PTCHD1
0.0235236	0.163545	9.74074	secretory granule localization	2	MAP2,RASGRP1
0.0235236	0.163545	9.74074	regulation of natural killer cell proliferation	2	PTPN22,IL18
0.0235236	0.163545	9.74074	negative regulation of fatty acid oxidation	2	CNR1,ACADL
0.0235236	0.163545	9.74074	positive regulation of keratinocyte migration	2	HBEGF,MMP9
0.0235236	0.163545	9.74074	branching involved in prostate gland morphogenesis	2	BMP4,SHH
0.0235236	0.163545	9.74074	negative regulation of cell growth involved in cardiac muscle cell development	2	RGS4,RGS2
0.0235236	0.163545	9.74074	thrombin-activated receptor signaling pathway	2	IQGAP2,HPGD
0.0235236	0.163545	9.74074	cellular response to lithium ion	2	SHH,FABP4
0.0235236	0.163545	9.74074	fibroblast activation	2	RGCC,ACTA2
0.0236197	0.164013	2.58304	regulation of cell population proliferation	83	CCN3,PTGS2,SERPINF1,PLAC8,APLN,RGCC,GREM1,PLA2G4A,IL24,VIPR1,SEMA5A,EFNB1,IL11,SPHK1,CD70,IGFBP2,PDGFB,IL7R,EDN1,VEGFA,IRS2,ANXA1,CEBPB,JCAD,NOG,FOXF1,VAV3,CRLF1,TXNIP,TGFA,BCHE,SCG2,NTRK2,PTPN22,TP53I11,PGR,EPHB1,DLL4,INHBA,DISP3,PBX1,DACH1,SPRY1,LHX1,HBEGF,SFN,PPARGC1A,BMP4,FES,CEACAM1,BST2,HMGN5,SPINT2,CALCRL,IL18,PYCARD,NR5A2,LGR5,PROX1,EGR3,ALK,PTPRC,CSF3,SHH,MMP9,AVPR1A,CXCR2,PTPRZ1,CSF2RB,…
0.0236699	0.164161	2.84243	cell-cell adhesion via plasma-membrane adhesion molecules	15	PCDH7,CDH6,ADGRL3,CDH23,PCDH18,TENM2,SLITRK2,GPC4,CEACAM1,ITGB2,SDK2,PCDH10,CLSTN2,CDH11,TGFB2
0.0237414	0.164272	2.06321	fatty acid metabolic process	21	PTGS2,PLA2G4A,FADS2,EDN1,IRS2,ANXA1,LPL,ACOX2,PPARGC1A,CEACAM1,ALOXE3,SLC27A2,PDK4,GGT5,AVPR1A,HPGD,CNR1,ACADL,IL1B,CD74,ADTRP
0.0237435	0.164272	1.7962	regulation of peptidase activity	16	TFPI2,PTGS2,SERPINF1,SERPIND1,VEGFA,A2M,SLPI,CYFIP2,SFN,COL7A1,BST2,SPINT2,PYCARD,MMP9,S100A8,LAPTM5
0.0238642	0.164907	1.98979	cellular response to external stimulus	12	PTGS2,ANKRD1,LPL,PHEX,SESN3,GAS2L1,PIEZO2,FES,PTPRC,PDK4,AVPR1A,IL1B
0.0239179	0.165077	2.39392	biomineralization	8	PTGS2,GREM1,CEBPB,SPP1,PHEX,BMP4,ADRB2,MMP13
0.024125	0.166305	2.5728	regulation of epithelial cell differentiation	9	VEGFA,CEBPB,SPRY1,LHX1,SFN,BMP4,CEACAM1,MMP9,IL1B
0.024195	0.166464	2.25065	positive regulation of protein kinase activity	21	RGCC,GREM1,CEMIP,PDGFB,EDN1,VEGFA,ADAM8,FZD8,MAP2K6,TGFA,HBEGF,GPRC5B,IL18,ADRB2,PROX1,PTPRC,RASGRP1,NEDD9,AFAP1L2,TGFB2,IL1B
0.0242358	0.166464	5.22698	bile acid and bile salt transport	3	ATP8B1,ABCC3,CEACAM1
0.0242358	0.166464	5.22698	positive regulation of cyclin-dependent protein serine/threonine kinase activity	3	RGCC,PDGFB,PROX1
0.0242758	0.166538	2.82538	regulation of potassium ion transport	6	RGS4,AKAP6,KCNC1,ACTN2,WNK2,RGS7
0.0244628	0.167618	2.81972	memory	9	PTGS2,SERPINF1,KCNK10,PLK2,CEBPB,CUX2,PTCHD1,RASGRF1,CNR1
0.0246385	0.168619	2.56096	organelle fusion	7	TBC1D4,SPHK1,DYSF,ANXA1,VAV3,STXBP6,SNAP25
0.024725	0.168886	2.81209	positive regulation of immune response	24	RGCC,PLA2G4A,LPXN,ANXA1,ADAM8,VAV3,CFH,A2M,PTPN22,SKAP1,PLPP4,THEMIS2,CEACAM1,ITGB2,IL18,PYCARD,PTPRC,RASGRP1,LAPTM5,C3AR1,CNR1,TGFB2,IL1B,CD74
0.0247368	0.168886	2.37746	potassium ion transmembrane transport	13	KCNK10,RGS4,KCNK6,KCNA2,NALCN,AKAP6,KCNN3,KCNB2,KCNC1,ACTN2,WNK2,SNAP25,RGS7
0.0249656	0.170244	3.83166	response to amyloid-beta	4	ADRB2,MMP3,MMP9,MMP13
0.0252747	0.172146	1.52283	regulation of organelle organization	37	RGCC,BMF,TBC1D4,SEMA5A,SPHK1,IQGAP2,RGS4,LIMCH1,PDGFB,EDN1,PLK2,MAP2,ANXA1,GAS2L1,TGFA,ARHGAP18,ARHGAP28,CYFIP2,C15orf62,PPARGC1A,BMP4,FES,BST2,PKIB,ADRB2,PYCARD,PROX1,EPHA3,CSF3,MMP9,ABI3,GRHL3,S100A8,ACTN2,PDE3A,LPAR1,IL1B
0.0253403	0.172387	5.126	regulation of striated muscle cell differentiation	10	CCN3,GREM1,RGS4,EDN1,RGS2,AKAP6,BMP4,PROX1,SHH,SOX6
0.0253926	0.172536	5.12181	regulation of phosphatidylinositol 3-kinase signaling	10	PDGFB,NTRK2,CEACAM1,ROR1,IL18,CSF3,RASGRP1,UNC5B,PPP1R16B,TGFB2
0.0254842	0.172953	2.54185	negative regulation of canonical Wnt signaling pathway	7	GREM1,SHISA3,IGFBP2,NOG,DKK2,SHH,NKD1
0.0256317	0.173746	5.1028	insulin secretion	10	CCN3,ILDR2,IRS2,ANXA1,GPR68,ANO1,RAPGEF4,SNAP25,CNR1,IL1B
0.0262799	0.177928	1.80973	calcium ion transport	15	PTGS2,CEMIP,RGS4,PDGFB,JPH2,EDN1,CDH23,PLPP4,HOMER3,NALCN,AKAP6,CACNG6,CALCRL,PTPRC,CACNG4
0.0263522	0.178206	5.04646	heparan sulfate proteoglycan metabolic process	3	SULF2,HS6ST3,CSGALNACT1
0.0264549	0.178586	3.13538	SMAD protein signal transduction	5	CCN3,INHBA,BMP4,BMP5,TGFB2
0.0264711	0.178586	3.75777	ventricular cardiac muscle tissue development	4	NOG,DLL4,PROX1,TGFB2
0.0265036	0.178594	2.21246	phagocytosis	15	SPHK1,COLEC12,TGM2,DYSF,ANXA1,VAV3,LEPR,NCF2,PLPP4,ITGB2,PYCARD,PTPRC,ICAM5,IL1B,ADGRB1
0.0268794	0.180912	2.33755	respiratory system development	13	STRA6,VEGFA,NOG,FOXF1,PHEX,ALDH1A3,PGR,SPRY1,AGR2,BMP4,PROX1,SHH,FOXA1
0.0269956	0.181479	2.02017	leukocyte activation	42	PLA2G4A,ILDR2,EFNB1,IL11,SPHK1,CD70,IGFBP2,DYSF,IL7R,EDN1,IRS2,ANXA1,CEBPB,LFNG,FOXF1,ADAM8,VAV3,FZD8,LEPR,PTPN22,EPHB1,DLL4,INHBA,PBX1,THEMIS2,BMP4,FES,CEACAM1,BST2,ITGB2,IL18,PYCARD,EGR3,PTPRC,SHH,RASGRP1,CXCR2,LAPTM5,MAFB,CNR1,IL1B,CD74
0.0271299	0.181971	8.90958	bile acid metabolic process	5	ATP8B1,SLC27A2,NR5A2,PROX1,CYP39A1
0.0271327	0.181971	2.10049	glucose homeostasis	10	SERPINF1,IRS2,SESN3,LEPR,GPR68,PPARGC1A,ANO1,FOXA1,PDK4,CNR1
0.0272018	0.18222	8.89652	prostate gland epithelium morphogenesis	4	NOG,BMP4,SHH,FOXA1
0.0274342	0.182702	8.85474	telencephalon regionalization	2	BMP4,SHH
0.0274342	0.182702	8.85474	positive regulation of renal sodium excretion	2	EDN1,AVPR1A
0.0274342	0.182702	8.85474	positive regulation of epidermal growth factor-activated receptor activity	2	TGFA,HBEGF
0.0274342	0.182702	8.85474	peripheral nervous system neuron development	2	ETV1,NTRK2
0.0274342	0.182702	8.85474	extracellular regulation of signal transduction	2	LTBP1,GREM1
0.0277149	0.184356	1.75987	cytokine-mediated signaling pathway	22	SPHK1,CD70,PDGFB,IL7R,EDN1,CRLF1,LEPR,CEACAM1,CSF3R,IL18,CXCL3,PYCARD,PTPRC,CSF3,CXCR2,LAPTM5,CSF2RB,STAT5A,IFITM1,ACKR3,IL1B,CD74
0.0280299	0.186016	3.68667	ovarian follicle development	4	VEGFA,CEBPB,LFNG,INHBA
0.0280299	0.186016	3.68667	negative regulation of viral genome replication	4	SLPI,BST2,PROX1,IFITM1
0.0280742	0.186094	4.91203	blood vessel endothelial cell proliferation involved in sprouting angiogenesis	6	SEMA5A,VEGFA,JCAD,DLL4,BMP4,PPP1R16B
0.0281403	0.186315	2.48619	learning	7	PTGS2,STRA6,BCHE,NTRK2,ATP8A1,ADGRB3,SNAP25
0.0283179	0.187273	2.31265	regulation of leukocyte differentiation	17	IL7R,ANXA1,CEBPB,ADAM8,FSTL3,INHBA,GPR68,BMP4,FES,CEACAM1,IL18,EGR3,PTPRC,SHH,RASGRP1,MAFB,CD74
0.0284072	0.187645	2.18407	chemical homeostasis	41	SERPINF1,CEMIP,TGM2,JPH2,EDN1,VEGFA,SLC6A9,IRS2,LPL,SESN3,CDH23,LEPR,DISP3,ACOX2,AKAP6,SFN,GPR68,PPARGC1A,ANO1,SCNN1A,ALOXE3,IL18,TLCD4,CALB2,NR5A2,GPR4,PTPRC,FOXA1,FABP4,PDK4,GRHL3,AVPR1A,CXCR2,S100A8,WNK2,ALAS2,CYP39A1,ACKR3,C3AR1,LPAR1,CNR1
0.0285644	0.187813	4.87798	positive regulation of vasoconstriction	3	PTGS2,HRH2,AVPR1A
0.0285644	0.187813	4.87798	response to lipoprotein particle	3	LPL,ITGB2,ADTRP
0.0285644	0.187813	4.87798	adrenergic receptor signaling pathway	3	RGS2,ADRB1,ADRB2
0.0285644	0.187813	4.87798	regulation of renal system process	3	PDGFB,EDN1,AVPR1A
0.0289408	0.190068	3.05667	cellular response to acid chemical	5	VEGFA,CEBPB,SESN3,NTRK2,AVPR1A
0.0293668	0.192644	2.69504	positive regulation of adaptive immune response	6	PLA2G4A,SKAP1,IL18,PYCARD,PTPRC,IL1B
0.0296422	0.194227	3.6182	oocyte differentiation	4	EDN1,NPR2,LGR5,PDE3A
0.0297516	0.194719	3.03247	segmentation	7	LFNG,FOXF1,COBL,LHX1,BMP4,DMRT2,MAFB
0.0300117	0.195971	2.4504	regulation of insulin secretion	7	CCN3,IRS2,GPR68,ANO1,SNAP25,CNR1,IL1B
0.0300117	0.195971	2.4504	cellular response to carbohydrate stimulus	7	SERPINF1,COLEC12,IRS2,MAP2K6,GPR68,ANO1,CALCRL
0.0302045	0.197004	3.59422	cell migration involved in sprouting angiogenesis	9	PTGS2,GREM1,VEGFA,PLK2,ANXA1,JCAD,DLL4,EGR3,ADTRP
0.030468	0.198414	4.74555	lung epithelium development	5	STRA6,AGR2,BMP4,SHH,FOXA1
0.0305122	0.198414	3.57915	epithelial cell proliferation	27	CCN3,SERPINF1,APLN,RGCC,SEMA5A,PDGFB,VEGFA,CEBPB,JCAD,NOG,TGFA,SCG2,PGR,DLL4,SFN,BMP4,CEACAM1,LGR5,PROX1,EGR3,SHH,COL8A2,STAT5A,PPP1R16B,BMP5,TGFB2,CNMD
0.0305252	0.198414	2.2771	epithelial cell development	14	PDGFB,VEGFA,PGR,TFCP2L1,SFN,BMP4,SPINT2,ACTA2,GPR4,PROX1,FOXA1,PPP1R16B,BMP5,IL1B
0.030872	0.199756	4.72037	positive regulation of interleukin-2 production	3	ANXA1,PTPRC,IL1B
0.030872	0.199756	4.72037	positive regulation of telomerase activity	3	GREM1,PARM1,PKIB
0.030872	0.199756	4.72037	positive regulation of animal organ morphogenesis	3	EDN1,SPRY1,BMP4
0.030872	0.199756	4.72037	regulation of presynapse assembly	3	SLITRK2,GPC4,SLITRK5
0.0311202	0.200723	2.26826	negative regulation of cell development	8	SEMA5A,VEGFA,NPR2,MAP2,NOG,SPP1,SEMA6D,IL1B
0.0312921	0.200723	8.15869	ureter development	4	FOXF1,LHX1,BMP4,SHH
0.0313085	0.200723	3.55222	multicellular organismal water homeostasis	4	SFN,SCNN1A,ALOXE3,GRHL3
0.0313085	0.200723	3.55222	regulation of miRNA transcription	4	APLN,PDGFB,BMP4,TGFB2
0.031332	0.200723	8.15293	protein kinase C signaling	4	ANKRD1,PDGFB,VEGFA,DGKG
0.0315855	0.200723	8.1164	negative regulation of B cell apoptotic process	2	IRS2,CD74
0.0315855	0.200723	8.1164	ventricular trabecula myocardium morphogenesis	2	DLL4,TGFB2
0.0315855	0.200723	8.1164	activation of transmembrane receptor protein tyrosine kinase activity	2	GREM1,ADRB2
0.0315855	0.200723	8.1164	mechanosensory behavior	2	STRA6,ETV1
0.0315855	0.200723	8.1164	regulation of amino acid import across plasma membrane	2	RGS4,RGS2
0.0315855	0.200723	8.1164	negative regulation of mast cell activation	2	FOXF1,CNR1
0.0315855	0.200723	8.1164	negative regulation of smooth muscle cell apoptotic process	2	EDN1,GRIA4
0.0315855	0.200723	8.1164	negative regulation of leukocyte degranulation	2	FOXF1,CEACAM1
0.0315855	0.200723	8.1164	lateral mesoderm development	2	FOXF1,SHH
0.0315855	0.200723	8.1164	induction of positive chemotaxis	2	VEGFA,SCG2
0.0315855	0.200723	8.1164	response to interleukin-7	2	IL7R,LSP1
0.0317445	0.201509	1.64522	cellular metal ion homeostasis	19	CEMIP,TGM2,JPH2,EDN1,SLC6A9,CDH23,AKAP6,SCNN1A,CALB2,GPR4,PTPRC,AVPR1A,CXCR2,S100A8,ALAS2,ACKR3,C3AR1,LPAR1,CNR1
0.0317816	0.201519	1.56108	cell differentiation	155	CCN3,PTGS2,SERPINF1,KRT8,PLAC8,SPOCD1,RGCC,GREM1,SEMA5A,ILDR2,EFNB1,IL11,LPXN,ANKRD1,TGM2,NCAM2,RGS4,DYSF,CSPG4,PDGFB,IL7R,EDN1,VEGFA,SULF2,NPR2,ETV1,MAP2,NTN4,ANXA1,FRY,CEBPB,FOXQ1,LFNG,LPL,NOG,FOXF1,SPP1,KRT75,ATP8B1,ADAM8,PAQR5,TNFAIP2,FZD8,LAMA2,ADGRL3,DNER,SH3TC2,MAP2K6,TXNIP,A2M,CDH23,BCHE,NAV2,LEPR,NTRK2,GPRIN3,PTPN22,FSTL3,PGR,EPHB1,DLL4,COBL,RORB,RGS2,ITGB4,INHBA,TENM2,TFCP2L1,CYFIP2,DIS…
0.0319865	0.202593	2.13442	protein kinase B signaling	9	SEMA5A,ADAM8,SESN3,NTRK2,HBEGF,IL18,CSF3,IL1B,ADTRP
0.0325411	0.205877	2.24707	regulation of lipid metabolic process	18	PTGS2,SPHK1,PDGFB,IRS2,ANXA1,VAV3,DISP3,PPARGC1A,CEACAM1,PROX1,ALK,PDK4,AVPR1A,BMP5,CNR1,ACADL,IL1B,CD74
0.0328025	0.2073	2.12404	cellular response to lipopolysaccharide	9	IL24,ANKRD1,CEBPB,PTPN22,IL18,CXCL3,PYCARD,CSF3,IL1B
0.0329024	0.207469	2.24209	positive regulation of angiogenesis	8	GREM1,SEMA5A,SPHK1,VEGFA,JCAD,ADM2,C3AR1,IL1B
0.0329385	0.207469	2.9457	regulation of T cell mediated immunity	5	IL7R,CEACAM1,IL18,PTPRC,IL1B
0.0329385	0.207469	2.9457	mucopolysaccharide metabolic process	5	CEMIP,PDGFB,CSGALNACT1,CHST1,IL1B
0.0330287	0.207807	3.4886	regulation of sprouting angiogenesis	4	VEGFA,JCAD,CEACAM1,PPP1R16B
0.0332745	0.208204	4.57261	protein kinase A signaling	3	EDN1,AKAP6,ADRB2
0.0332745	0.208204	4.57261	maintenance of blood-brain barrier	3	PTGS2,VEGFA,LAMA2
0.0332745	0.208204	4.57261	positive regulation of protein-containing complex disassembly	3	SEMA5A,ADRB2,ACTN2
0.0332745	0.208204	4.57261	embryonic eye morphogenesis	3	STRA6,ALDH1A3,PROX1
0.0332745	0.208204	4.57261	cellular response to fatty acid	3	EDN1,LPL,PDK4
0.0342198	0.213883	7.70369	positive regulation of leukocyte proliferation	15	EFNB1,CD70,IGFBP2,IRS2,ANXA1,VAV3,PTPN22,BST2,IL18,PYCARD,PTPRC,SHH,CSF2RB,IL1B,CD74
0.0343437	0.214422	2.91048	intermediate filament-based process	5	KRT8,SYNM,SYNC,KRT75,SHH
0.0344777	0.214788	2.10358	establishment or maintenance of cell polarity	9	FOXF1,EPHB1,ANK1,SPRY1,SPINT2,LIN7A,KIF26B,SHH,MAP7
0.0344777	0.214788	2.10358	cellular lipid catabolic process	9	PLA2G4A,SPHK1,IRS2,LPL,ACOX2,SLC27A2,CNR1,ACADL,ADTRP
0.0348032	0.216579	3.42721	regulation of neurotransmitter receptor activity	4	SLC6A9,ADRB2,RASGRF1,CACNG4
0.0349187	0.216677	4.47782	negative regulation of ion transport	9	PTGS2,RGS4,SLC6A9,RGS2,TCAF2,MMP9,ACTN2,WNK2,CNR1
0.0349622	0.216677	7.61164	female sex differentiation	10	STRA6,VEGFA,CEBPB,LFNG,A2M,PGR,INHBA,DACH1,LHX1,ARID5B
0.0349894	0.216677	2.00644	lymphocyte differentiation	20	IL11,IL7R,ANXA1,LFNG,ADAM8,FZD8,LEPR,PTPN22,DLL4,INHBA,PBX1,BMP4,IL18,EGR3,PTPRC,SHH,RASGRP1,MAFB,IL1B,CD74
0.0353371	0.216677	2.0935	positive regulation of ERK1 and ERK2 cascade	9	PDGFB,PTPN22,BMP4,ACTA2,PYCARD,PTPRC,RASGRP1,ACKR3,CD74
0.0355207	0.216677	1.26918	regulation of RNA biosynthetic process	83	PLAC8,APLN,RGCC,GREM1,IL11,LPXN,SPHK1,ANKRD1,PDGFB,EDN1,VEGFA,ETV1,CEBPB,LMO7,FOXQ1,NOG,FOXF1,SPP1,ALX4,ATP8B1,ADAM8,SSBP2,TXNIP,FSTL3,SKAP1,PGR,ZNF175,DLL4,RORB,HR,INHBA,TENM2,TFCP2L1,PBX1,HOXB8,ZNF845,DACH1,LHX1,ZNF160,ESR2,PPARGC1A,BMP4,ARID5B,EBF2,CSRNP3,HMGN5,ZNF100,ROR1,IL18,ZNF483,CUX2,ADRB2,PYCARD,NR5A2,ZNF813,PROX1,ZNF423,EGR3,ZNF738,ALK,ZFP82,CSF3,SHH,FOXA1,LMO2,DMRT2,FABP4,HOXB5,ZNF736…
0.0356456	0.216677	2.87886	regulation of ERK1 and ERK2 cascade	14	PDGFB,PTPN22,EPHB1,SPRY1,BMP4,CEACAM1,ACTA2,PYCARD,PTPRC,RASGRP1,WNK2,ACKR3,IL1B,CD74
0.0357715	0.216677	4.43381	bile acid biosynthetic process	3	SLC27A2,PROX1,CYP39A1
0.0357715	0.216677	4.43381	cGMP-mediated signaling	3	NPR2,PDE3A,GUCY1A2
0.0357715	0.216677	4.43381	aorta morphogenesis	3	DLL4,PROX1,TGFB2
0.0357715	0.216677	4.43381	positive regulation of blood pressure	3	ADRB1,AVPR1A,CNR1
0.0357715	0.216677	4.43381	cellular response to lipoprotein particle stimulus	3	LPL,ITGB2,ADTRP
0.0358558	0.216677	2.2019	response to mechanical stimulus	10	PTGS2,STRA6,IGFBP2,ANKRD1,EDN1,ETV1,TXNIP,PIEZO2,KCNC1,IL1B
0.0359369	0.216677	1.9967	cellular response to biotic stimulus	10	IL24,ANKRD1,CEBPB,TXNIP,PTPN22,IL18,CXCL3,PYCARD,CSF3,IL1B
0.0359661	0.216677	7.49166	parturition	2	EDN1,HPGD
0.0359661	0.216677	7.49166	cell proliferation in external granule layer	2	LHX1,SHH
0.0359661	0.216677	7.49166	positive regulation of heterotypic cell-cell adhesion	2	SKAP1,IL1B
0.0359661	0.216677	7.49166	regulation of circadian sleep/wake cycle, sleep	2	KCNA2,ADRB1
0.0359661	0.216677	7.49166	positive regulation of fatty acid oxidation	2	IRS2,PPARGC1A
0.0359661	0.216677	7.49166	lipid phosphorylation	2	SPHK1,DGKG
0.0359661	0.216677	7.49166	cardiac neural crest cell development involved in heart development	2	EDN1,BMP4
0.0359661	0.216677	7.49166	hepatocyte differentiation	2	ANXA1,PROX1
0.0359661	0.216677	7.49166	regulation of presynaptic cytosolic calcium ion concentration	2	CALB2,CNR1
0.0359661	0.216677	7.49166	positive regulation of endothelial cell chemotaxis	2	SEMA5A,VEGFA
0.0360804	0.216677	1.76839	response to peptide hormone	14	PTGS2,TBC1D4,EDN1,IRS2,ANXA1,LPL,PHEX,SESN3,PLAT,CEACAM1,PDK4,ACTN2,STAT5A,IL1B
0.0363436	0.216677	2.55359	bone mineralization	6	PTGS2,GREM1,PHEX,BMP4,ADRB2,MMP13
0.036632	0.216677	3.36794	positive regulation of interleukin-8 production	4	PYCARD,AFAP1L2,IL1B,CD74
0.036632	0.216677	3.36794	regulation of macrophage activation	4	PLA2G4A,SPHK1,PTPRC,CD74
0.036632	0.216677	3.36794	photoreceptor cell differentiation	4	VEGFA,NTRK2,RORB,SDK2
0.036632	0.216677	3.36794	positive regulation of Ras protein signal transduction	4	GPR4,RASGRP1,RASGRF1,LPAR1
0.0369242	0.216677	2.84993	myeloid cell activation involved in immune response	6	DYSF,FOXF1,FES,ITGB2,PYCARD,RASGRP1
0.0370997	0.216677	2.07361	positive regulation of neurogenesis	9	SERPINF1,SEMA5A,TGM2,VEGFA,NTRK2,CUX2,SHH,PTPRZ1,IL1B
0.037264	0.216677	2.84248	roof of mouth development	5	ALX4,INHBA,ARID5B,SHH,TGFB2
0.0375877	0.216677	2.83381	cellular component morphogenesis	33	SEMA5A,EFNB1,ANKRD1,EDN1,VEGFA,ETV1,MAP2,NOG,SPP1,LAMA2,NTRK2,EPHB1,COBL,ITGB4,CYFIP2,PGM5,SLITRK2,LHX1,UNC5C,SLITRK5,CUX2,PROX1,EPHA3,SHH,ADGRB3,ABI3,ACTN2,PTPRZ1,UNC5B,RIMS1,CDH11,SEMA6D,ADGRB1
0.0376011	0.216677	2.53144	myotube differentiation	6	CCN3,DNER,SHH,ADGRB3,AVPR1A,ADGRB1
0.0376591	0.216677	2.17921	positive regulation of I-kappaB kinase/NF-kappaB signaling	8	PLK2,LURAP1L,GPRC5B,BST2,ROR1,LPAR1,IL1B,CD74
0.0378709	0.216677	4.32119	positive regulation of cell-cell adhesion	20	EFNB1,CD70,IGFBP2,IL7R,ANXA1,ADAM8,PTPN22,FSTL3,SKAP1,ITGB2,IL18,KIF26B,PYCARD,EGR3,PTPRC,SHH,RASGRP1,FOXA1,IL1B,CD74
0.037967	0.216677	3.32657	diencephalon development	6	SEMA5A,NOG,BMP4,SHH,PTCHD1,KCNC1
0.0383622	0.216677	4.30317	Schwann cell differentiation	3	SH3TC2,NTRK2,ITGB4
0.0383622	0.216677	4.30317	regulation of dopamine secretion	3	KCNA2,SYT12,CNR1
0.0383622	0.216677	4.30317	embryonic camera-type eye development	3	STRA6,ALDH1A3,PROX1
0.0383622	0.216677	4.30317	neurotrophin signaling pathway	3	NTRK2,CYFIP2,SPRY1
0.0383622	0.216677	4.30317	dopaminergic neuron differentiation	3	VEGFA,SHH,FOXA1
0.0383622	0.216677	4.30317	neuron projection extension involved in neuron projection guidance	3	SEMA5A,VEGFA,SEMA6D
0.0384021	0.216677	1.71525	positive regulation of protein localization	15	PTGS2,CEMIP,ANKRD1,IRS2,ADAM8,AGR2,SFN,GPR68,ANO1,ITGB2,TCAF2,EPHA3,SHH,TGFB2,IL1B
0.0385152	0.216677	3.31067	neuron fate commitment	4	DLL4,BMP4,SHH,FOXA1
0.0385152	0.216677	3.31067	regulation of focal adhesion assembly	4	GREM1,LIMCH1,VEGFA,EPHA3
0.0385152	0.216677	3.31067	negative regulation of reproductive process	4	SERPINF1,NPR2,PLAT,BMP4
0.0385834	0.216677	4.27167	tube morphogenesis	64	CCN3,PTGS2,SERPINF1,APLN,STRA6,RGCC,GREM1,SEMA5A,SPHK1,TGM2,CSPG4,EDN1,VEGFA,PLK2,ANXA1,JCAD,NOG,FOXF1,ADAM8,VAV3,TNFAIP2,FZD8,ADM2,TGFA,SCG2,LEPR,NTRK2,PGR,EPHB1,DLL4,COBL,PBX1,SPRY1,LHX1,AGR2,BMP4,CEACAM1,SPINT2,PTPRB,THSD7A,CALCRL,IL18,KIF26B,GPR4,LGR5,PROX1,EGR3,SHH,FOXA1,ADGRB3,COL8A2,GRHL3,UNC5B,HPGD,PPP1R16B,ACKR3,C3AR1,ASB2,BMP5,TGFB2,IL1B,ADTRP,CNMD,ADGRB1
0.0387704	0.216677	1.21354	regulation of macromolecule metabolic process	151	CCN3,TFPI2,PTGS2,SERPINF1,SERPIND1,PLAC8,APLN,SPOCD1,RGCC,DEPTOR,LTBP1,GREM1,CEMIP,IL24,ILDR2,IL11,LPXN,SPHK1,ANKRD1,LIMCH1,CSPG4,PDGFB,IL7R,EDN1,VEGFA,RTN1,SLC6A9,IRS2,SULF2,ETV1,PLK2,ANXA1,FRY,CEBPB,LMO7,FOXQ1,NNMT,LPL,NOG,CELF2,FOXF1,SPP1,ALX4,PLEKHN1,ATP8B1,ADAM8,FZD8,MAP2K6,ADM2,CRLF1,SSBP2,TXNIP,TGFA,A2M,LEPR,NTRK2,PTPN22,FSTL3,SKAP1,PGR,ZNF175,DLL4,RORB,RGS2,HR,INHBA,HOMER3,TENM2,SLPI,TFCP…
0.0389216	0.216677	2.0541	regulation of intracellular protein transport	9	PTGS2,CEMIP,SH3TC2,SFN,BMP4,ITGB2,TCAF2,SHH,IL1B
0.0396429	0.216677	1.96107	immune effector process	26	RGCC,CD70,DYSF,IL7R,ANXA1,LFNG,FOXF1,VAV3,CFH,A2M,PTPN22,PLPP4,GPRC5B,FES,CEACAM1,BST2,ITGB2,IL18,PYCARD,PTPRC,RASGRP1,LAPTM5,CSF2RB,TGFB2,IL1B,CD74
0.0401827	0.216677	1.37969	positive regulation of nitrogen compound metabolic process	88	PTGS2,PLAC8,APLN,RGCC,GREM1,CEMIP,IL24,IL11,SPHK1,ANKRD1,LIMCH1,CSPG4,PDGFB,EDN1,VEGFA,SLC6A9,ETV1,PLK2,CEBPB,LMO7,NNMT,NOG,FOXF1,SPP1,ALX4,PLEKHN1,ADAM8,FZD8,MAP2K6,CRLF1,SSBP2,TGFA,LEPR,NTRK2,PTPN22,FSTL3,SKAP1,PGR,ZNF175,RORB,INHBA,TFCP2L1,CYFIP2,PBX1,ZNF845,LHX1,ESR2,PARM1,HBEGF,GPRC5B,PPARGC1A,BMP4,ARID5B,PKIB,EBF2,CSRNP3,HMGN5,IL18,ADRB2,PYCARD,NR5A2,PROX1,ZNF423,EGR3,PTPRC,CSF3,SHH,RASGRP1…
0.0401986	0.216677	2.48826	response to organophosphorus	6	PTGS2,THBD,AKAP6,PLAT,PDE3A,IL1B
0.0401986	0.216677	2.48826	monocarboxylic acid catabolic process	6	IRS2,ACOX2,SLC27A2,CNR1,ACADL,ADTRP
0.0402365	0.216677	6.98822	endothelial cell chemotaxis	4	CCN3,SEMA5A,VEGFA,EGR3
0.0403754	0.216677	6.97461	spinal cord dorsal/ventral patterning	3	DLL4,SHH,CHRD
0.0404529	0.216677	3.25532	zymogen activation	4	PRSS3,CYFIP2,PLAT,PYCARD
0.0404529	0.216677	3.25532	regulation of osteoclast differentiation	4	CEBPB,FSTL3,GPR68,MAFB
0.0404529	0.216677	3.25532	negative regulation of axonogenesis	4	SEMA5A,MAP2,SPP1,SEMA6D
0.0404529	0.216677	3.25532	regulation of nitric oxide metabolic process	4	PTGS2,EDN1,ACP5,IL1B
0.0405651	0.216677	6.95616	positive regulation of bone resorption	2	SPP1,ADAM8
0.0405651	0.216677	6.95616	detection of temperature stimulus involved in sensory perception of pain	2	EPHB1,ANO1
0.0405651	0.216677	6.95616	positive regulation of membrane protein ectodomain proteolysis	2	ADAM8,IL1B
0.0405651	0.216677	6.95616	nephric duct development	2	LHX1,BMP4
0.0405651	0.216677	6.95616	metanephric glomerulus development	2	PDGFB,LHX1
0.0405651	0.216677	6.95616	regulation of epithelial cell differentiation involved in kidney development	2	LHX1,MMP9
0.041717	0.222621	2.7497	glial cell differentiation	12	NOG,DNER,SH3TC2,NTRK2,ITGB4,ROR1,SHH,S100A8,PTPRZ1,TSPAN2,SOX6,IL1B
0.0417818	0.222758	2.13137	regulation of neuron differentiation	8	DISP3,PBX1,GPRC5B,BMP4,PROX1,ALK,SHH,FOXA1
0.0419223	0.222881	2.74622	morphogenesis of a polarized epithelium	5	FOXF1,GPC4,ROR1,NKD1,GRHL3
0.0419223	0.222881	2.74622	axis specification	5	COBL,LHX1,BMP4,SHH,CXXC4
0.0419223	0.222881	2.74622	oligodendrocyte differentiation	5	NTRK2,SHH,PTPRZ1,TSPAN2,SOX6
0.042084	0.223532	1.81555	protein localization to cell periphery	12	SKAP1,ANK1,GPC4,AGR2,LIN7A,KCNB2,EPHA3,RAB3C,MAP7,ABI3,ACTN2,SNAP25
0.0424451	0.22503	3.20178	mechanoreceptor differentiation	4	ATP8B1,CDH23,NTRK2,BMP4
0.0424451	0.22503	3.20178	animal organ formation	4	NOG,SPRY1,BMP4,SHH
0.0428573	0.227004	2.11973	response to hexose	8	PTGS2,SERPINF1,ILDR2,IRS2,LPL,TXNIP,GPR68,ANO1
0.042898	0.227009	1.36868	response to external biotic stimulus	40	PTGS2,PLAC8,PRSS3,IL24,COLEC12,ANKRD1,IL7R,EDN1,THBD,ANXA1,CEBPB,LPL,ADAM8,CFH,A2M,PTPN22,NCF2,ZNF175,SLPI,TRAC,FES,CEACAM1,BST2,ACTA2,IL18,CXCL3,PYCARD,PTPRC,CSF3,RASGRP1,FABP4,S100A8,CSF2RB,HPGD,IFITM1,ACP5,CNR1,IL1B,CD74,ADGRB1
0.0438219	0.231682	4.06366	regulation of transforming growth factor beta production	3	PTGS2,LTBP1,TGFB2
0.0440629	0.23274	1.80158	regulation of cytosolic calcium ion concentration	14	CEMIP,JPH2,EDN1,CDH23,AKAP6,CALB2,GPR4,PTPRC,AVPR1A,CXCR2,ACKR3,C3AR1,LPAR1,CNR1
0.0441635	0.233056	1.8566	ion transport	54	PTGS2,KCNK10,PLA2G4A,CEMIP,RGS4,PDGFB,JPH2,EDN1,SLC6A9,ANXA1,CEBPB,KCNK6,ATP8B1,KCNA2,MAP2K6,ABCG2,CDH23,NTRK2,SLC16A6,PIEZO2,RGS2,ATP8A1,PLPP4,SLC17A9,HOMER3,NALCN,SLC47A1,ABCC3,AKAP6,SYT12,CEACAM1,ANO1,SCNN1A,CACNG6,CALCRL,TCAF2,ADRB2,KCNN3,KCNB2,PTPRC,MMP9,GRIA4,SLCO2A1,KCNC1,CHRM3,RASGRF1,AVPR1A,ACTN2,WNK2,CACNG4,SNAP25,RGS7,CNR1,IL1B
0.0442284	0.233182	1.64991	cellular divalent inorganic cation homeostasis	16	CEMIP,TGM2,JPH2,EDN1,CDH23,AKAP6,CALB2,GPR4,PTPRC,AVPR1A,CXCR2,S100A8,ACKR3,C3AR1,LPAR1,CNR1
0.0445442	0.23463	1.85294	regulation of cell development	19	SERPINF1,SEMA5A,TGM2,VEGFA,NPR2,MAP2,NOG,SPP1,NTRK2,DLL4,GPR68,BMP4,CUX2,SHH,NEDD9,PTPRZ1,PDE3A,SEMA6D,IL1B
0.0449049	0.234649	2.4175	activation of protein kinase activity	8	RGCC,GREM1,PDGFB,VEGFA,GPRC5B,IL18,ADRB2,TGFB2
0.0449726	0.234649	6.52482	negative regulation of mononuclear cell migration	4	CCN3,GREM1,BMP5,ADTRP
0.0450028	0.234649	6.52234	heart trabecula morphogenesis	4	NOG,DLL4,BMP5,TGFB2
0.0453721	0.234649	6.49206	positive regulation of type 2 immune response	2	IL18,CD74
0.0453721	0.234649	6.49206	segment specification	2	COBL,MAFB
0.0453721	0.234649	6.49206	regulation of striated muscle tissue development	2	JPH2,BMP4
0.0453721	0.234649	6.49206	preganglionic parasympathetic fiber development	2	NAV2,ACKR3
0.0453721	0.234649	6.49206	stabilization of membrane potential	2	KCNK10,KCNK6
0.0453721	0.234649	6.49206	positive regulation of vascular permeability	2	VEGFA,PDE3A
0.0453721	0.234649	6.49206	long-chain fatty acid import into cell	2	IRS2,SLC27A2
0.0453721	0.234649	6.49206	positive regulation of protein export from nucleus	2	SFN,IL1B
0.0453721	0.234649	6.49206	post-embryonic animal organ development	2	VEGFA,CDH23
0.0453721	0.234649	6.49206	trophoblast cell migration	2	VEGFA,ITGB4
0.0453721	0.234649	6.49206	protein trimerization	2	CLYBL,CD74
0.0453721	0.234649	6.49206	G protein-coupled receptor signaling pathway involved in heart process	2	EDN1,RGS2
0.0453721	0.234649	6.49206	regulation of protein kinase C signaling	2	VEGFA,DGKG
0.0453721	0.234649	6.49206	cellular response to thyroid hormone stimulus	2	GAS2L1,LMO2
0.0453721	0.234649	6.49206	regulation of endothelial cell development	2	VEGFA,IL1B
0.0453721	0.234649	6.49206	positive regulation of voltage-gated potassium channel activity	2	AKAP6,KCNC1
0.0453721	0.234649	6.49206	negative regulation of anoikis	2	NTRK2,PDK4
0.0454621	0.234901	2.22565	positive regulation of transport	41	PTGS2,APLN,RGCC,GREM1,PLA2G4A,CEMIP,ANKRD1,PDGFB,JPH2,EDN1,VEGFA,SLC6A9,IRS2,MAP2,ANXA1,CEBPB,SPP1,ADAM8,MAP2K6,ATP8A1,INHBA,AKAP6,SFN,GPR68,ANO1,ITGB2,TCAF2,ADRB2,PYCARD,PTPRC,SHH,KCNC1,AVPR1A,S100A8,ACTN2,WNK2,CACNG4,RGS7,CNR1,TGFB2,IL1B
0.0455696	0.235243	1.84539	Wnt signaling pathway	19	GREM1,SEMA5A,SHISA3,IGFBP2,EDN1,SULF2,NOG,FZD8,GPC4,GPRC5B,DKK2,ROR1,APCDD1L,LGR5,SHH,NKD1,GRHL3,CXXC4,WNK2
0.0457278	0.235846	2.40615	positive regulation of protein secretion	6	ANKRD1,IRS2,ADAM8,GPR68,ANO1,TGFB2
0.0457749	0.235875	1.98856	reactive oxygen species metabolic process	9	HBA1,PDGFB,EDN1,NCF2,ITGB2,MMP3,PDK4,ACP5,ADGRB1
0.0458266	0.235882	1.59169	positive regulation of hydrolase activity	18	TBC1D4,TGM2,RGS4,VEGFA,CYFIP2,ADRB1,RAPGEF4,PYCARD,PTPRC,RASGRP1,RASGRF1,NEDD9,GRHL3,AVPR1A,S100A8,LAPTM5,RGS7,LPAR1
0.0458591	0.235882	3.98341	regulation of interleukin-8 production	7	ANXA1,PTPN22,PYCARD,PTPRC,AFAP1L2,IL1B,CD74
0.0460821	0.236816	1.78874	circulatory system development	64	CCN3,PTGS2,SERPINF1,APLN,STRA6,RGCC,GREM1,SEMA5A,SPHK1,ANKRD1,RGS4,CSPG4,PDGFB,JPH2,EDN1,VEGFA,PLK2,ANXA1,JCAD,NOG,FOXF1,ADAM8,VAV3,TNFAIP2,FZD8,ADM2,TGFA,SCG2,LEPR,NTRK2,EPHB1,DLL4,RGS2,SPRY1,AKAP6,BMP4,CEACAM1,PTPRB,ACTA2,THSD7A,CALCRL,IL18,GPR4,PROX1,EGR3,SHH,ADGRB3,COL8A2,ACTN2,UNC5B,FREM2,SOX6,HPGD,PPP1R16B,ACKR3,XIRP2,C3AR1,ASB2,BMP5,TGFB2,IL1B,ADTRP,CNMD,ADGRB1
0.0466891	0.239502	3.95362	regulation of amino acid transport	3	RGS4,RGS2,AVPR1A
0.0466891	0.239502	3.95362	energy homeostasis	3	LEPR,PPARGC1A,ALK
0.0469169	0.240238	2.65623	regulation of chemokine production	5	LPL,IL18,PYCARD,IL1B,CD74
0.0469169	0.240238	2.65623	negative regulation of extrinsic apoptotic signaling pathway	5	SCG2,BMP4,UNC5B,BMP5,IL1B
0.0471803	0.24137	2.38646	regulation of interleukin-1 production	6	SPHK1,ANXA1,LPL,CEACAM1,PYCARD,ACP5
0.0477703	0.244146	1.48289	cellular chemical homeostasis	24	SERPINF1,CEMIP,TGM2,JPH2,EDN1,SLC6A9,IRS2,CDH23,AKAP6,GPR68,PPARGC1A,ANO1,SCNN1A,CALB2,GPR4,PTPRC,AVPR1A,CXCR2,S100A8,ALAS2,ACKR3,C3AR1,LPAR1,CNR1
0.0478087	0.244146	1.60574	response to inorganic substance	17	PTGS2,SERPINF1,SPHK1,IGFBP2,HBA1,EDN1,ANXA1,PHEX,TXNIP,SYT12,MMP3,SHH,MMP9,FABP4,KCNC1,AVPR1A,S100A8
0.0483158	0.246515	2.19376	axonogenesis	23	SEMA5A,EFNB1,EDN1,VEGFA,ETV1,MAP2,NOG,SPP1,LAMA2,NTRK2,EPHB1,COBL,SLITRK2,LHX1,UNC5C,SLITRK5,EPHA3,SHH,PTPRZ1,UNC5B,CDH11,SEMA6D,ADGRB1
0.0486569	0.247526	2.62753	long-term synaptic potentiation	5	PLK2,NTRK2,SYT12,CALB2,SNAP25
0.0486569	0.247526	2.62753	bone morphogenesis	5	PAPPA2,BMP4,CSGALNACT1,ACP5,MMP13
0.0487044	0.247526	2.18984	positive regulation of protein transport	13	PTGS2,CEMIP,ANKRD1,IRS2,ADAM8,SFN,GPR68,ANO1,ITGB2,TCAF2,SHH,TGFB2,IL1B
0.0487484	0.247526	3.0512	regulation of cardiac muscle hypertrophy	4	RGS4,EDN1,RGS2,AKAP6
0.0487484	0.247526	3.0512	regulation of cell-substrate junction organization	4	GREM1,LIMCH1,VEGFA,EPHA3
0.0487748	0.247526	3.87813	positive regulation of striated muscle cell differentiation	6	GREM1,EDN1,AKAP6,BMP4,PROX1,SHH
0.0489275	0.24808	3.87307	peripheral nervous system development	6	ETV1,SH3TC2,NTRK2,ITGB4,EGR3,ADGRB1
0.0496465	0.251054	3.84936	positive regulation of nitric oxide biosynthetic process	3	PTGS2,EDN1,IL1B
0.0496465	0.251054	3.84936	positive regulation of heart growth	3	EDN1,AKAP6,PROX1
0.0496465	0.251054	3.84936	response to dexamethasone	3	SERPINF1,EDN1,PLAT
0.0496962	0.251083	3.03011	actin cytoskeleton reorganization	8	IQGAP2,ANXA1,FES,THSD7A,CSF3,ABI3,NEDD9,ASB2

## Sheet: GO terms Cellular Components
p-value	adj_pval	OddsRatio	Term	count_DE_genes	DE_genes
6.57288e-12	3.49677e-09	2.16001	plasma membrane	193	PTGS2,PCDH7,KCNK10,CDH6,MTUS1,STRA6,ITGBL1,BMF,CEMIP,VIPR1,GLIPR1,SEMA5A,FADS2,EFNB1,LPXN,SPHK1,IQGAP2,COLEC12,CD70,IGFBP2,TGM2,NCAM2,RGS4,DYSF,CSPG4,PDGFB,JPH2,IL7R,SYNM,THBD,SLC6A9,IRS2,SULF2,NPR2,NTN4,ANXA1,SYNC,CSMD2,LMO7,FILIP1,LPL,JCAD,KCNK6,LRATD2,PLEKHN1,ATP8B1,ADAM8,VAV3,PAQR5,FZD8,PHEX,KCNA2,LAMA2,ADGRL3,DNER,SH3TC2,ABCG2,CRLF1,TGFA,CDH23,ARHGAP18,BCHE,LEPR,NTRK2,GPRIN3,PTPN22,NCF2,SLC1…
3.30628e-09	8.7947e-07	2.36067	integral component of plasma membrane	70	PCDH7,KCNK10,STRA6,ITGBL1,VIPR1,FADS2,EFNB1,CD70,CSPG4,THBD,SLC6A9,NPR2,KCNK6,ATP8B1,ADAM8,PHEX,KCNA2,ADGRL3,NTRK2,NCF2,SLC16A6,PCDH18,EPHB1,ITGB4,TENM2,ABCC3,HRH2,ADRB1,HBEGF,GPR68,CEACAM1,ANO1,CSF3R,SCNN1A,ITGA10,PTPRB,SLC14A1,ROR1,ITGB2,CALCRL,ADRB2,TSPAN11,GPR4,KCNB2,LGR5,EPHA3,ALK,PTPRC,GRIA4,ICAM5,ADGRB3,SLCO2A1,TMEM266,KCNC1,CHRM3,AVPR1A,CXCR2,PTPRZ1,TSPAN2,LAPTM5,CSF2RB,CACNG4,PCDH10,CLST…
9.56905e-07	0.000146899	3.0733	cell surface	43	ITGBL1,GREM1,IQGAP2,CSPG4,PDGFB,IL7R,THBD,VEGFA,SULF2,ANXA1,LMO7,LPL,ADAM8,ABCG2,CRLF1,TGFA,LEPR,ITGB4,GPC4,HBEGF,PLAT,GPRC5B,CEACAM1,BST2,GLDN,CSF3R,ITGA10,UNC5C,ROR1,ITGB2,ALPP,PTPRC,SHH,KCNC1,CXCR2,CSF2RB,VWDE,CACNG4,CLSTN2,ACKR3,LPAR1,CD74,ADTRP
1.1045e-06	0.000146899	3.54459	cell periphery	216	CCN3,TFPI2,PTGS2,PCDH7,SERPINF1,KCNK10,CDH6,MTUS1,STRA6,ITGBL1,LTBP1,GREM1,BMF,CEMIP,VIPR1,GLIPR1,SEMA5A,FADS2,EFNB1,LPXN,EDIL3,SPHK1,IQGAP2,COLEC12,CD70,IGFBP2,TGM2,NCAM2,RGS4,DYSF,CSPG4,PDGFB,JPH2,IL7R,SYNM,THBD,VEGFA,SLC6A9,IRS2,SULF2,NPR2,NTN4,ANXA1,FRY,SYNC,CSMD2,LMO7,FILIP1,LPL,JCAD,TINAGL1,KCNK6,LRATD2,PLEKHN1,ATP8B1,ADAM8,VAV3,PAQR5,TNFAIP2,FZD8,PHEX,KCNA2,LAMA2,ADGRL3,DNER,SH3TC2,ABCG2,C…
1.70462e-05	0.00181372	1.61702	vesicle	119	PCDH7,SERPINF1,KRT8,SERPIND1,MEST,PLAC8,BMF,CEMIP,PRSS3,GLIPR1,TBC1D4,SEMA5A,SMS,EFNB1,EDIL3,SPHK1,IQGAP2,COLEC12,CD70,IGFBP2,TGM2,HBA1,DYSF,CSPG4,PDGFB,IL7R,EDN1,VEGFA,SLC6A9,ANXA1,LFNG,TINAGL1,SPP1,KRT75,ADAM8,ALDH1A3,DNER,SH3TC2,CFH,TGFA,A2M,SCG2,NTRK2,SCG5,NCF2,EPHB1,PAPPA2,ATP8A1,MOXD1,NEURL1B,ITGB4,SLC17A9,SLPI,CYFIP2,SLC47A1,DISP3,GREB1,OSCAR,GPC4,ADRB1,PARM1,HBEGF,SYT12,PLAT,SFN,GPRC5B,CO…
2.61849e-05	0.00232173	3.09297	endocytic vesicle	20	CEMIP,SPHK1,COLEC12,HBA1,DYSF,IL7R,ADAM8,TGFA,NCF2,HBEGF,CSF3R,ADRB2,RAB11FIP4,CSF3,GRIA4,AVPR1A,SCARF1,CACNG4,LPAR1,CD74
4.52334e-05	0.00343773	3.06664	collagen-containing extracellular matrix	27	CCN3,SERPINF1,LTBP1,GREM1,EDIL3,TGM2,CSPG4,PDGFB,NTN4,ANXA1,TINAGL1,LAMA2,A2M,NAV2,ITGB4,SLPI,GPC4,COL7A1,LOXL4,SHH,MMP9,COL8A2,S100A8,PTPRZ1,ACAN,FREM2,TGFB2
0.000132074	0.00807995	1.93644	cytoplasmic vesicle membrane	43	PCDH7,CEMIP,GLIPR1,SPHK1,IQGAP2,COLEC12,DYSF,IL7R,SLC6A9,ANXA1,ADAM8,TGFA,NTRK2,EPHB1,ATP8A1,MOXD1,SLC17A9,DISP3,PARM1,HBEGF,SYT12,GPRC5B,CEACAM1,BST2,ZFYVE28,CSF3R,SLC27A2,PTPRB,ITGB2,CLVS2,ADRB2,RAB11FIP4,PTPRC,RAB3C,GRIA4,CXCR2,SCARF1,CACNG4,SNAP25,C3AR1,MARCHF3,LDLRAD4,CD74
0.000136691	0.00807995	3.12771	basal part of cell	16	PDGFB,EDN1,SLC6A9,ANXA1,TGFA,LEPR,ITGB4,ANK1,SLC47A1,ABCC3,CEACAM1,SLC14A1,LIN7A,MAP7,CHRM3,HPGD
0.000202998	0.0107995	2.08274	secretory granule	37	PCDH7,PLAC8,BMF,PRSS3,GLIPR1,IQGAP2,PDGFB,EDN1,VEGFA,SLC6A9,ADAM8,A2M,SCG2,SCG5,NCF2,ATP8A1,MOXD1,SLC17A9,SLPI,OSCAR,PLAT,CEACAM1,BST2,SCNN1A,SLC27A2,PTPRB,ITGB2,PYCARD,PTPRC,MMP9,CXCR2,S100A8,ACTN2,SNAP25,C3AR1,TGFB2,IL1B
0.00026743	0.0129339	2.3462	receptor complex	25	ITGBL1,VIPR1,CRLF1,LEPR,NTRK2,SKAP1,EPHB1,ITGB4,TRAC,GPRC5B,CSF3R,ITGA10,PTPRB,ROR1,ITGB2,SLITRK5,CALCRL,ADRB2,EPHA3,LOXL4,ALK,GRIA4,CSF2RB,CACNG4,CD74
0.0005371	0.0238115	4.71131	specific granule membrane	8	ADAM8,ATP8A1,CEACAM1,SLC27A2,PTPRB,ITGB2,SNAP25,C3AR1
0.000632761	0.0258945	1.61274	bounding membrane of organelle	64	PTGS2,PCDH7,PLA2G4A,BMF,CEMIP,GLIPR1,SPHK1,IQGAP2,COLEC12,PDGFB,JPH2,IL7R,THBD,RTN1,SLC6A9,ANXA1,LFNG,ADAM8,TGFA,NTRK2,PGR,EPHB1,ATP8A1,MOXD1,SLC17A9,AKAP6,PARM1,HBEGF,SYT12,COL7A1,CEACAM1,BST2,ZFYVE28,CSF3R,SCNN1A,SLC27A2,PTPRB,EVC2,GALNT17,ITGB2,CLVS2,ADRB2,PYCARD,RAB11FIP4,PTPRC,RAB3C,SHH,RASGRP1,GRIA4,CXCR2,SCARF1,LAPTM5,CACNG4,SNAP25,CLSTN2,ST8SIA1,CSGALNACT1,IFITM1,CHST1,C3AR1,MARCHF3,LDLRA…
0.000732991	0.0275695	1.75825	synapse	44	EFNB1,SPHK1,SLC6A9,SYNC,KCNA2,LAMA2,ADGRL3,CDH23,NTRK2,EPHB1,HOMER3,TENM2,CYFIP2,SLITRK2,HRH2,GPC4,ADRB1,SYT12,PLAT,UNC5C,RAPGEF4,LIN7A,ROR1,CALB2,EGR3,RAB3C,PPFIBP2,SDK2,GRIA4,ADGRB3,ABI3,PTCHD1,KCNC1,CHRM3,ACTN2,PTPRZ1,RIMS1,CACNG4,SNAP25,CLSTN2,PALMD,CDH11,CNR1,ADGRB1
0.000777335	0.0275695	3.00136	basolateral plasma membrane	13	PDGFB,SLC6A9,ANXA1,TGFA,LEPR,ANK1,SLC47A1,ABCC3,SLC14A1,LIN7A,MAP7,CHRM3,HPGD
0.00103816	0.0345188	1.72235	extracellular space	103	TFPI2,SERPINF1,KRT8,SERPIND1,MEST,MTUS1,APLN,GREM1,PRSS3,IL24,GLIPR1,SEMA5A,SMS,EFNB1,IL11,EDIL3,IQGAP2,COLEC12,CD70,IGFBP2,TGM2,HBA1,DYSF,CSPG4,PDGFB,EDN1,THBD,VEGFA,SULF2,ANXA1,LPL,TINAGL1,NOG,SPP1,KRT75,TNFAIP2,ALDH1A3,CFH,CRLF1,TGFA,A2M,BCHE,SCG2,FSTL3,EPHB1,PAPPA2,ATP8A1,MOXD1,ITGB4,INHBA,SLPI,CYFIP2,GREB1,OSCAR,GPC4,AGR2,HBEGF,PLAT,SFN,GPRC5B,COL7A1,BMP4,DKK2,CEACAM1,BST2,ANO1,GLDN,SCNN1A,S…
0.00146531	0.0458557	3.60776	sarcolemma	9	DYSF,SYNM,ANXA1,SYNC,LAMA2,PGM5,AKAP6,CACNG6,CACNG4
0.00207289	0.0612654	1.8501	anchoring junction	30	CCN3,CDH6,ITGBL1,ILDR2,LPXN,TGM2,CSPG4,SYNM,VEGFA,ANXA1,LMO7,JCAD,KCNA2,ADGRL3,SKAP1,ITGB4,PGM5,AKAP6,FES,CEACAM1,LIN7A,ITGB2,CALB2,PTPRC,NEDD9,ACTN2,STXBP6,XIRP2,CDH11,ADGRB1
0.00279447	0.0782451	4.63637	stress fiber	6	LIMCH1,GAS2L1,PGM5,ROR1,ACTA2,XIRP2
0.00327717	0.0871726	3.87723	basement membrane	7	SERPINF1,NTN4,LAMA2,ITGB4,COL7A1,COL8A2,FREM2
0.00346211	0.0877068	1.79987	somatodendritic compartment	29	CCN3,SERPINF1,PLK2,MAP2,KCNA2,DNER,NTRK2,EPHB1,COBL,HOMER3,TENM2,HRH2,UNC5C,CALB2,PYCARD,KCNN3,KCNB2,GRIA4,TMEM266,ABI3,KCNC1,CHRM3,ACTN2,CACNG4,SNAP25,CLSTN2,PALMD,TGFB2,ADGRB1
0.00365087	0.0882847	1.42302	integral component of membrane	159	PCDH7,MEST,KCNK10,CDH6,STRA6,ITGBL1,VIPR1,GLIPR1,SEMA5A,FADS2,ILDR2,EFNB1,TMEM158,SHISA3,COLEC12,CD70,NCAM2,DYSF,CSPG4,JPH2,IL7R,THBD,RTN1,SLC6A9,NPR2,B4GALNT3,CSMD2,LFNG,KCNK6,ATP8B1,ADAM8,PAQR5,HS6ST3,FZD8,PHEX,KCNA2,ADGRL3,DNER,ABCG2,TGFA,CDH23,LEPR,NTRK2,TP53I11,NCF2,SLC16A6,PCDH18,EPHB1,PIEZO2,DLL4,ATP8A1,MOXD1,PLPP4,ITGB4,SLC17A9,TMEM71,TENM2,NALCN,SLC47A1,DISP3,TMTC1,ABCC3,GREB1,OSCAR,TRAC…
0.00514177	0.118931	4.05492	actin filament bundle	6	LIMCH1,GAS2L1,PGM5,ROR1,ACTA2,XIRP2
0.0056837	0.125063	3.47977	filopodium	7	IQGAP2,MAP2,EPHB1,TENM2,UNC5C,ACTA2,ACTN2
0.005877	0.125063	24.17	phagolysosome	2	ADAM8,NCF2
0.00626006	0.128091	1.71142	extracellular region	133	CCN3,TFPI2,SERPINF1,KRT8,SERPIND1,MEST,PLAC8,MTUS1,APLN,ITGBL1,LTBP1,GREM1,CEMIP,PRSS3,IL24,GLIPR1,SEMA5A,SMS,EFNB1,IL11,EDIL3,IQGAP2,COLEC12,CD70,IGFBP2,TGM2,HBA1,DYSF,CSPG4,PDGFB,IL7R,EDN1,THBD,VEGFA,SULF2,NTN4,ANXA1,LFNG,LPL,TINAGL1,NOG,SPP1,KRT75,TNFAIP2,ALDH1A3,LAMA2,CFH,ADM2,CRLF1,TGFA,A2M,BCHE,SCG2,LEPR,SCG5,FSTL3,EPHB1,PAPPA2,ATP8A1,MOXD1,ITGB4,INHBA,PINLYP,SLPI,CYFIP2,GREB1,OSCAR,GPC4,AG…
0.00665538	0.131136	1.86124	dendrite	23	CCN3,PLK2,MAP2,KCNA2,DNER,NTRK2,EPHB1,COBL,HOMER3,TENM2,HRH2,UNC5C,CALB2,KCNB2,GRIA4,TMEM266,ABI3,KCNC1,CHRM3,ACTN2,CLSTN2,PALMD,ADGRB1
0.0081174	0.153975	19.335	axon hillock	2	SERPINF1,MAP2
0.00839336	0.153975	2.71822	adherens junction	10	CDH6,SYNM,VEGFA,ANXA1,JCAD,PGM5,CEACAM1,LIN7A,STXBP6,CDH11
0.0096644	0.171382	2.27594	distal axon	12	MAP2,KCNA2,NTRK2,COBL,TENM2,UNC5C,ROR1,CALB2,KCNC1,RASGRF1,SNAP25,CNR1
0.0106782	0.178584	16.1117	dendritic growth cone	2	MAP2,COBL
0.0109381	0.178584	2.15579	endoplasmic reticulum lumen	14	PTGS2,SERPIND1,LTBP1,PDGFB,EDN1,SPP1,BCHE,SCG2,FSTL3,COL7A1,BMP4,SLC27A2,SHH,COL8A2
0.01118	0.178584	4.97397	protein complex involved in cell adhesion	4	ITGBL1,ITGB4,ITGA10,ITGB2
0.0115112	0.178584	2.42897	membrane raft	16	PTGS2,EFNB1,ABCG2,SKAP1,EPHB1,AKAP6,BST2,ANO1,ITGB2,PTPRC,SHH,GASK1A,UNC5B,RGS7,CNR1,ADTRP
0.011749	0.178584	3.9162	platelet alpha granule lumen	5	PDGFB,VEGFA,A2M,ACTN2,TGFB2
0.0135455	0.189638	13.8093	junctional sarcoplasmic reticulum membrane	2	JPH2,AKAP6
0.0135455	0.189638	13.8093	chromaffin granule membrane	2	ATP8A1,SLC17A9
0.0135455	0.189638	13.8093	serine-type endopeptidase complex	2	THBD,CFH
0.0155294	0.196969	1.99271	apical plasma membrane	14	IGFBP2,CSPG4,SLC6A9,ANXA1,LMO7,ATP8B1,ABCG2,PAPPA2,SLC47A1,CEACAM1,BST2,ANO1,SCNN1A,ADRB2
0.0156848	0.196969	3.623	clathrin-coated endocytic vesicle membrane	5	IL7R,TGFA,HBEGF,ADRB2,CD74
0.0165654	0.196969	3.56954	tertiary granule membrane	5	ADAM8,CEACAM1,PTPRB,ITGB2,SNAP25
0.0184812	0.196969	1.68024	plasma membrane protein complex	26	CDH6,ITGBL1,KCNK6,ADAM8,FZD8,KCNA2,CDH23,NCF2,SKAP1,ITGB4,PGM5,TRAC,CACNG6,ITGA10,EVC2,LIN7A,ITGB2,CALCRL,KCNB2,GNAL,GRIA4,KCNC1,CSF2RB,CACNG4,CDH11,CD74
0.0188305	0.196969	5.80909	neuronal cell body membrane	3	KCNA2,KCNB2,KCNC1
0.0189388	0.196969	1.52153	cytoplasmic vesicle	81	PCDH7,SERPINF1,PLAC8,BMF,CEMIP,PRSS3,GLIPR1,SPHK1,IQGAP2,COLEC12,IGFBP2,HBA1,DYSF,PDGFB,IL7R,EDN1,VEGFA,SLC6A9,ANXA1,ADAM8,DNER,SH3TC2,TGFA,A2M,SCG2,NTRK2,SCG5,NCF2,EPHB1,ATP8A1,MOXD1,NEURL1B,SLC17A9,SLPI,DISP3,OSCAR,ADRB1,PARM1,HBEGF,SYT12,PLAT,GPRC5B,COL7A1,FES,CEACAM1,BST2,ZFYVE28,CSF3R,SCNN1A,SLC27A2,PTPRB,ITGB2,DIAPH2,CALCRL,CLVS2,ADRB2,PYCARD,RAB11FIP4,EPHA3,PTPRC,RAB3C,CSF3,MMP9,GRIA4,AVPR…
0.0201462	0.196969	10.7394	L-type voltage-gated calcium channel complex	2	CACNG6,CACNG4
0.0202979	0.196969	2.67048	extracellular matrix	34	CCN3,TFPI2,SERPINF1,LTBP1,GREM1,EDIL3,COLEC12,TGM2,CSPG4,PDGFB,VEGFA,NTN4,ANXA1,TINAGL1,LAMA2,A2M,NAV2,ITGB4,SLPI,GPC4,COL7A1,MMP1,MMP3,LOXL4,SHH,MMP9,COL8A2,S100A8,PTPRZ1,ACAN,ADAMTS17,FREM2,MMP13,TGFB2
0.0213079	0.202425	2.44958	site of polarized growth	8	MAP2,FRY,COBL,TENM2,UNC5C,RASGRF1,SNAP25,CNR1
0.0226911	0.211783	2.4189	cytoplasmic side of plasma membrane	8	PTPN22,RGS2,ANK1,PGM5,FES,GNAL,PTPRC,SNAP25
0.0238539	0.21351	9.66499	SCAR complex	2	CYFIP2,ABI3
0.0244652	0.21351	2.13852	contractile fiber	10	ANKRD1,JPH2,SYNM,SYNC,ANK1,PGM5,ACTA2,ACTN2,XIRP2,ASB2
0.0247106	0.21351	5.18588	catenin complex	3	CDH6,CDH23,CDH11
0.0248353	0.21351	1.60905	lytic vacuole	23	PLAC8,GLIPR1,CSPG4,TINAGL1,ADAM8,NCF2,ATP8A1,GPC4,BST2,CSF3R,CALCRL,ADRB2,PYCARD,CSF3,CXCR2,ACAN,LAPTM5,IFITM1,C3AR1,MARCHF3,ACP5,IL1B,CD74
0.0248827	0.21351	2.37427	early endosome membrane	8	SPHK1,ANXA1,NTRK2,EPHB1,ZFYVE28,CLVS2,MARCHF3,LDLRAD4
0.0254561	0.214963	1.81689	focal adhesion	15	ITGBL1,LPXN,TGM2,CSPG4,ANXA1,LMO7,ITGB4,PGM5,FES,ITGB2,PTPRC,NEDD9,ACTN2,XIRP2,ADGRB1
0.0275925	0.216962	8.82532	dense core granule	4	SLC6A9,ADAM8,SCG2,PLAT
0.0278166	0.216962	8.78589	neuronal dense core vesicle	2	SCG2,PLAT
0.0278166	0.216962	8.78589	phospholipid-translocating ATPase complex	2	ATP8B1,ATP8A1
0.0278448	0.216962	1.33428	cell projection	60	CCN3,PTGS2,SERPINF1,LPXN,IQGAP2,NCAM2,CSPG4,PLK2,MAP2,ANXA1,JCAD,SPP1,ATP8B1,KCNA2,ADGRL3,DNER,ABCG2,CDH23,ARHGAP18,NTRK2,EPHB1,COBL,RGS2,SPATA7,HOMER3,TENM2,ANK1,CYFIP2,HRH2,CEACAM1,GLDN,SCNN1A,UNC5C,EVC2,ROR1,ACTA2,THSD7A,CALB2,KCNN3,KCNB2,EPHA3,PTPRC,FOXA1,GRIA4,MAP7,TMEM266,ABI3,KCNC1,CHRM3,RASGRF1,NEDD9,ACTN2,RIMS1,SNAP25,CLSTN2,PALMD,PPP1R16B,CNR1,TGFB2,ADGRB1
0.0281398	0.216962	2.72355	actin filament	6	ANXA1,SMTN,GAS2L1,COBL,DIAPH2,ACTN2
0.0281398	0.216962	2.72355	plasma membrane raft	6	PTGS2,SKAP1,AKAP6,ITGB2,GASK1A,ADTRP
0.0303551	0.230699	3.5895	azurophil granule membrane	4	GLIPR1,ATP8A1,BST2,C3AR1
0.0314663	0.235214	4.68328	hippocampal mossy fiber to CA3 synapse	3	SLC6A9,SYT12,RAPGEF4
0.0321225	0.235214	2.13209	early endosome	17	SPHK1,DYSF,ANXA1,DNER,NTRK2,EPHB1,NEURL1B,ADRB1,PARM1,ZFYVE28,DIAPH2,CLVS2,ADRB2,EPHA3,ACKR3,MARCHF3,LDLRAD4
0.03646	0.235214	7.43344	parallel fiber to Purkinje cell synapse	2	SLC6A9,CALB2
0.0367249	0.235214	1.31787	extracellular exosome	57	SERPINF1,KRT8,SERPIND1,MEST,SEMA5A,SMS,EFNB1,EDIL3,IQGAP2,CD70,IGFBP2,TGM2,HBA1,DYSF,CSPG4,ANXA1,TINAGL1,SPP1,KRT75,ALDH1A3,CFH,A2M,EPHB1,PAPPA2,ATP8A1,ITGB4,SLPI,CYFIP2,GREB1,OSCAR,GPC4,PLAT,SFN,GPRC5B,CEACAM1,BST2,ANO1,SCNN1A,SLC27A2,C5orf46,LIN7A,ACTA2,ITGB2,CUX2,GNAL,LOXL4,ALK,PTPRC,MMP9,FABP4,S100A8,ACTN2,FREM2,HPGD,LSP1,CDH11,CD74
0.0377151	0.235214	2.06636	cation channel complex	9	KCNK6,KCNA2,AKAP6,SCNN1A,CACNG6,KCNB2,GRIA4,KCNC1,CACNG4
0.0385243	0.235214	1.54872	perinuclear region of cytoplasm	22	SERPINF1,LPXN,TGM2,SYNC,JCAD,SPP1,PHEX,TGFA,NTRK2,PTPN22,COBL,INHBA,CYFIP2,AKAP6,RAB3C,MAP7,LAPTM5,SNAP25,PPP1R16B,ACKR3,SLC2A12,ADGRB1
0.0389468	0.235214	1.30687	extracellular membrane-bounded organelle	59	SERPINF1,KRT8,SERPIND1,MEST,SEMA5A,SMS,EFNB1,EDIL3,IQGAP2,CD70,IGFBP2,TGM2,HBA1,DYSF,CSPG4,ANXA1,LFNG,TINAGL1,SPP1,KRT75,ALDH1A3,CFH,A2M,EPHB1,PAPPA2,ATP8A1,ITGB4,SLPI,CYFIP2,GREB1,OSCAR,GPC4,PLAT,SFN,GPRC5B,CEACAM1,BST2,ANO1,SCNN1A,SLC27A2,C5orf46,LIN7A,ACTA2,ITGB2,CUX2,GNAL,LOXL4,ALK,PTPRC,MMP9,GRIA4,FABP4,S100A8,ACTN2,FREM2,HPGD,LSP1,CDH11,CD74
0.0411182	0.235214	6.90212	exocyst	2	TNFAIP2,STXBP6
0.0411182	0.235214	6.90212	costamere	2	SYNM,PGM5
0.0433547	0.245369	2.11398	clathrin-coated vesicle	8	CEMIP,IL7R,EDN1,TGFA,HBEGF,CLVS2,ADRB2,CD74
0.0456654	0.255726	2.40666	Z disc	6	JPH2,SYNC,PGM5,ACTN2,XIRP2,ASB2
0.0468702	0.259739	1.66504	external side of plasma membrane	15	IL7R,THBD,ANXA1,ABCG2,CRLF1,LEPR,GPC4,CSF3R,ITGA10,ITGB2,PTPRC,CXCR2,CSF2RB,ACKR3,CD74
0.0476636	0.261413	3.07527	integral component of presynaptic membrane	4	SLC6A9,KCNA2,KCNC1,CNR1
0.048179	0.261543	2.63504	lysosomal lumen	5	CSPG4,GPC4,CSF3,ACAN,CD74
