# Supplementary figures and images for: Impact of the m.13513G>A Variant on the Functions of the OXPHOS System and Cell Retrograde Signaling
Source: MDPI journal article supplement (doi:10.3390/cimb45030115), 2023-02-22

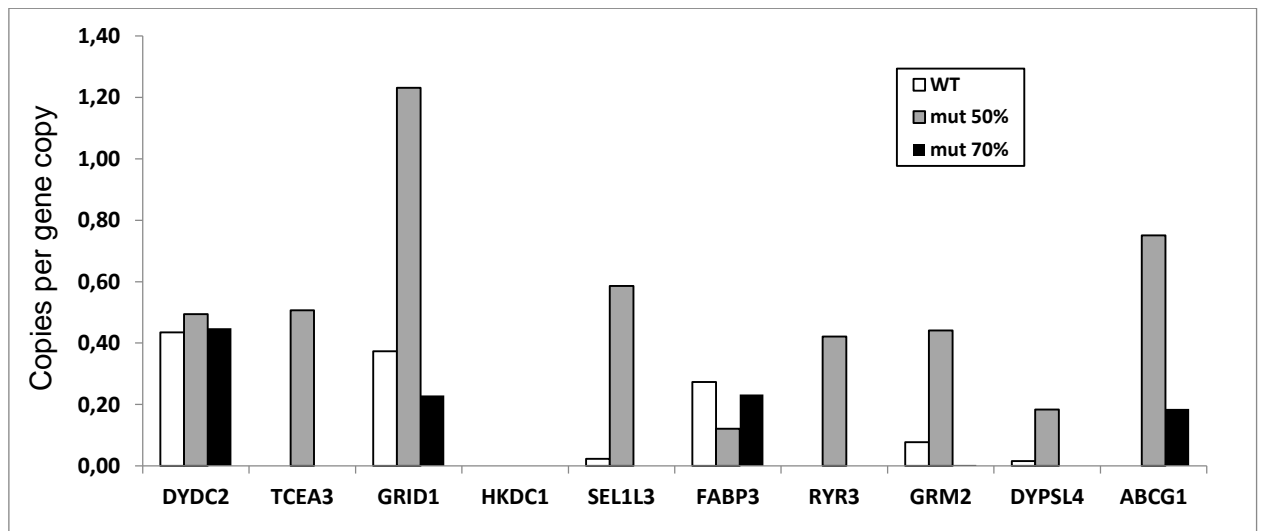

Supplement: s1 [file s1]
